# Supplementary material
Source: PubMed Central journal article supplement (PMC4449330)
Supplement: NIHMS680470-supplement-1.pdf [file NIHMS680470-supplement-1.pdf]

**Supplementary Fig. 1. Examples of deconvolution and annotation result from hydrophilic interaction chromatography tandem mass spectrometry.** Total 40 results including five standard compounds are described. NIST 12, MassBank, and ReSpect MS/MS libraries were used for peak annotations. Left panels (top and bottom) show the raw MS/MS chromatograms and the MS/MS spectrum of each metabolite. In middle-top panels, both raw- and deconvoluted MS/MS chromatograms are described where regular and bold lines show raw- and deconvoluted chromatograms, respectively. The deconvoluted MS/MS spectrum is shown in middle-down panels. Right panels show the deconvoluted MS/MS spectrum in blue and the reference MS/MS spectrum in red.

# Arginine-<sup>15</sup>N<sub>2</sub>

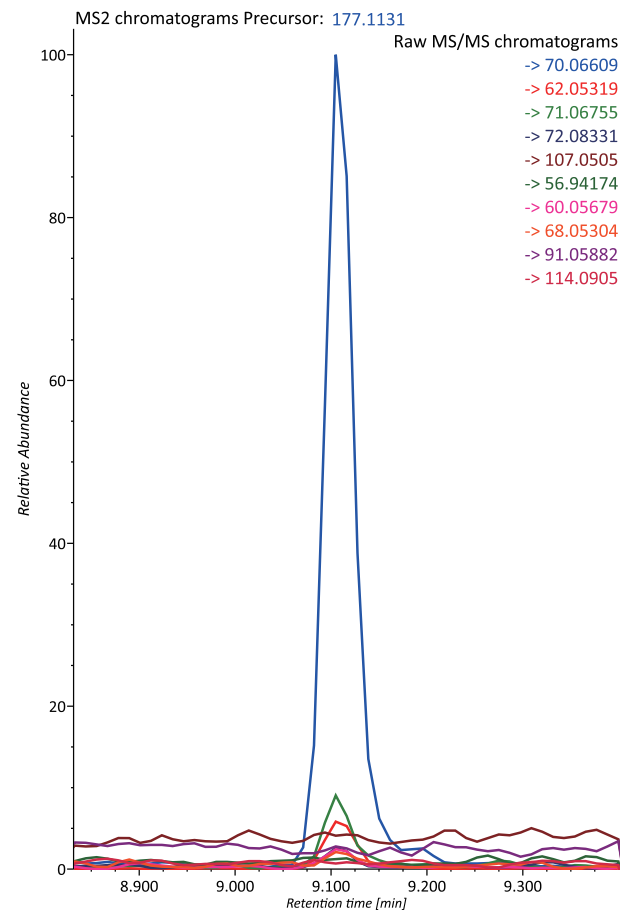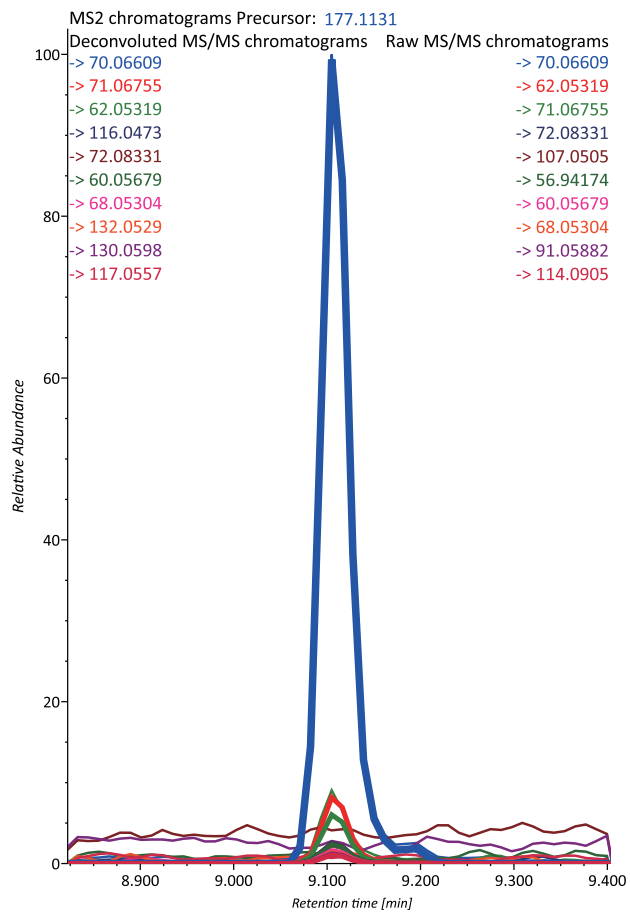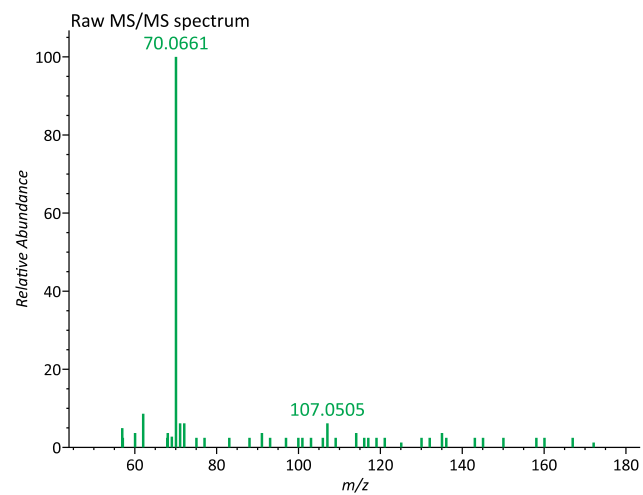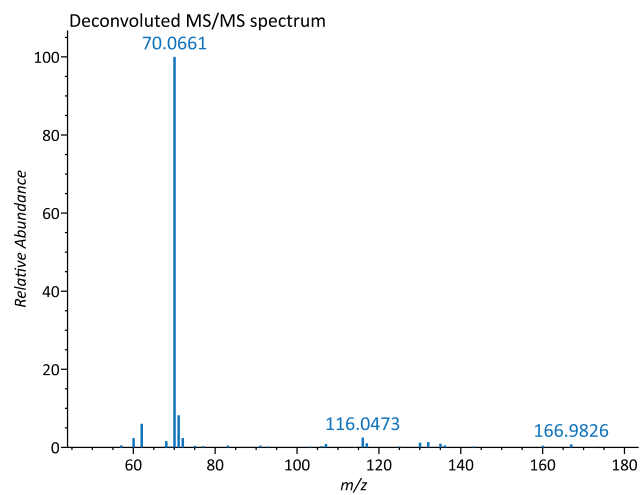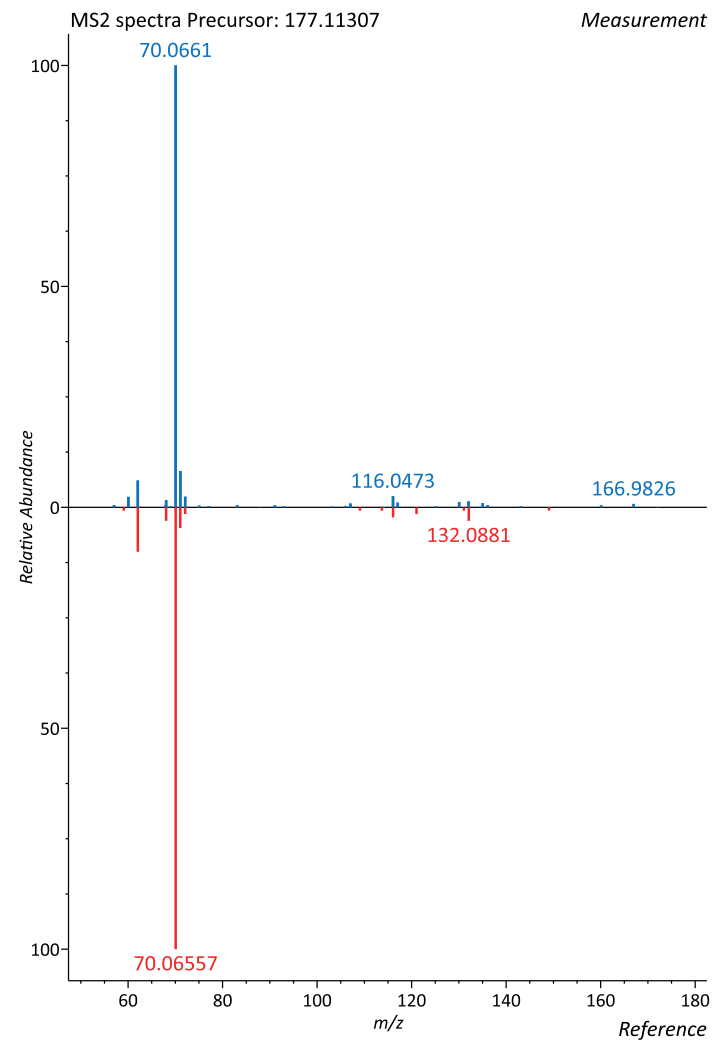

# Betaine-D<sub>3</sub>

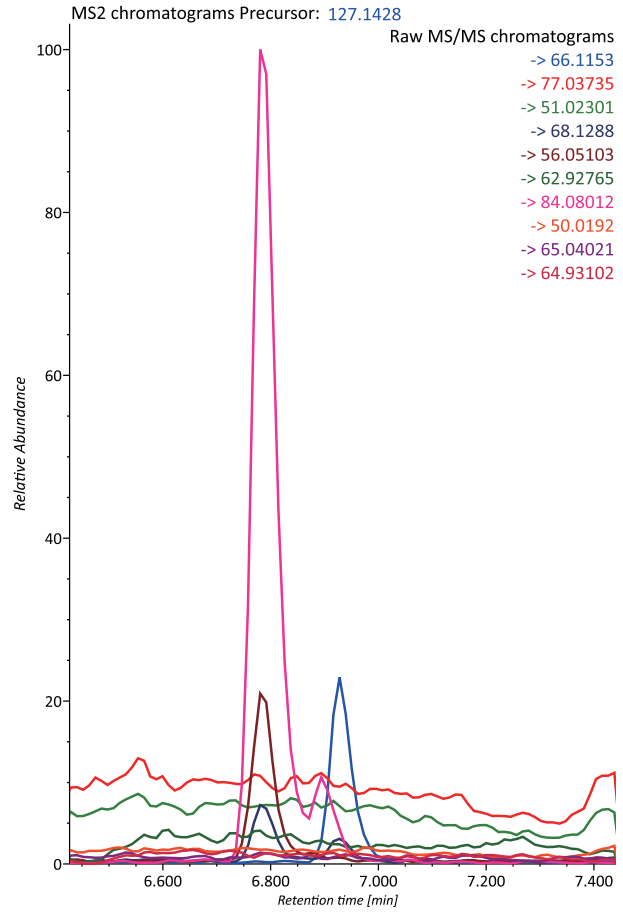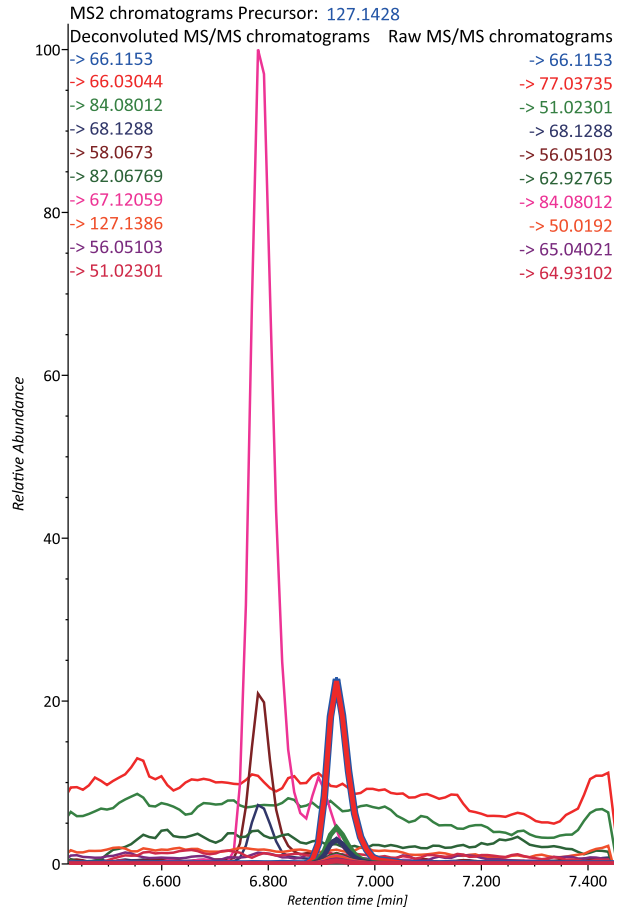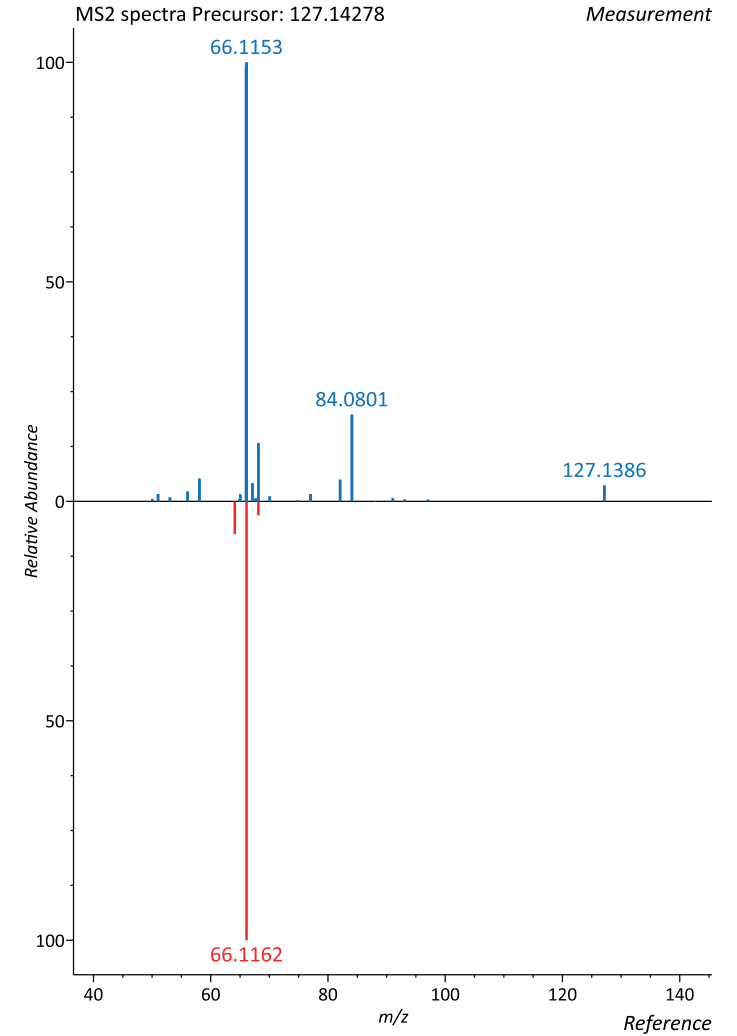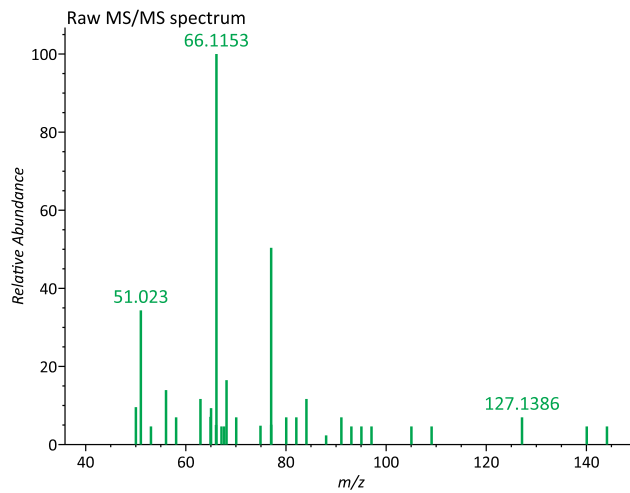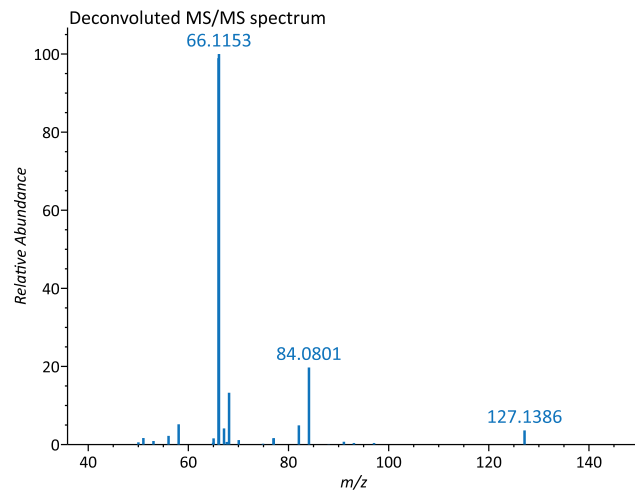

# Choline-D<sub>9</sub>

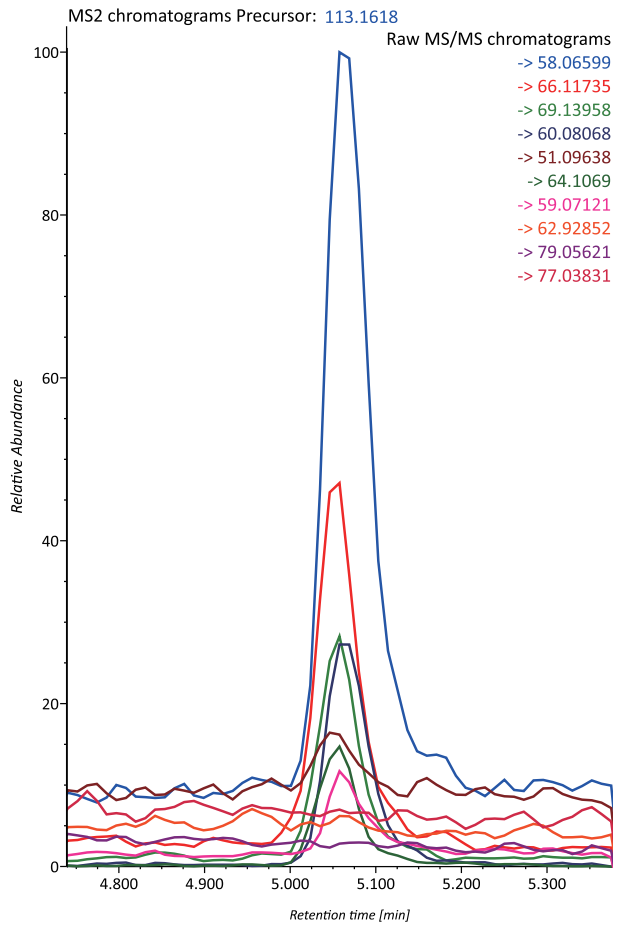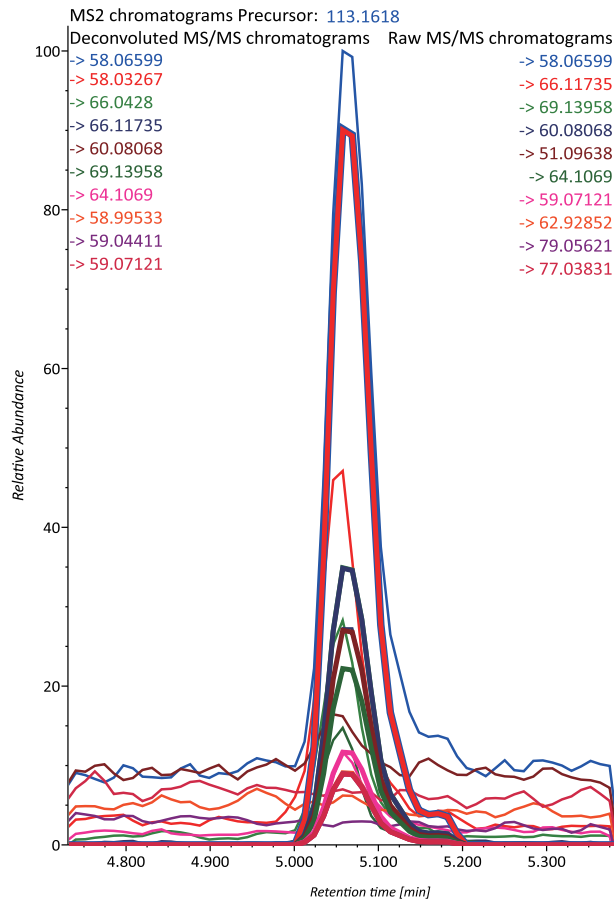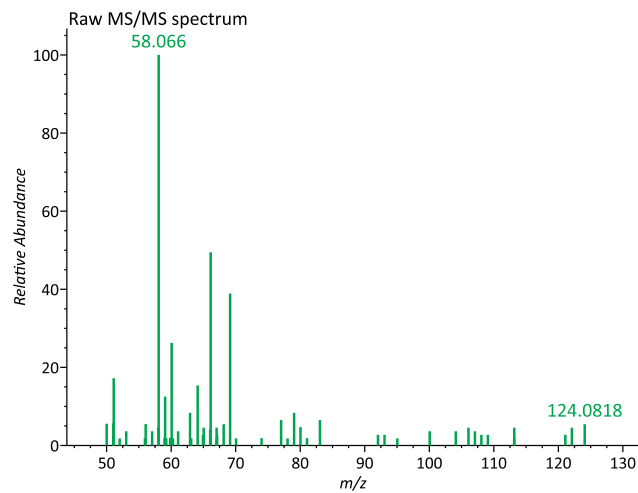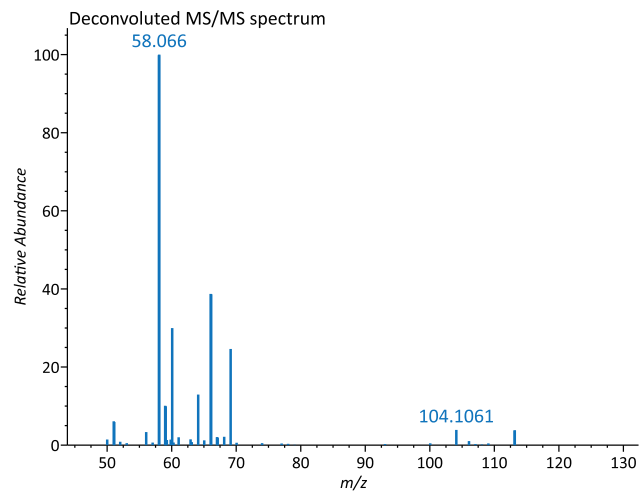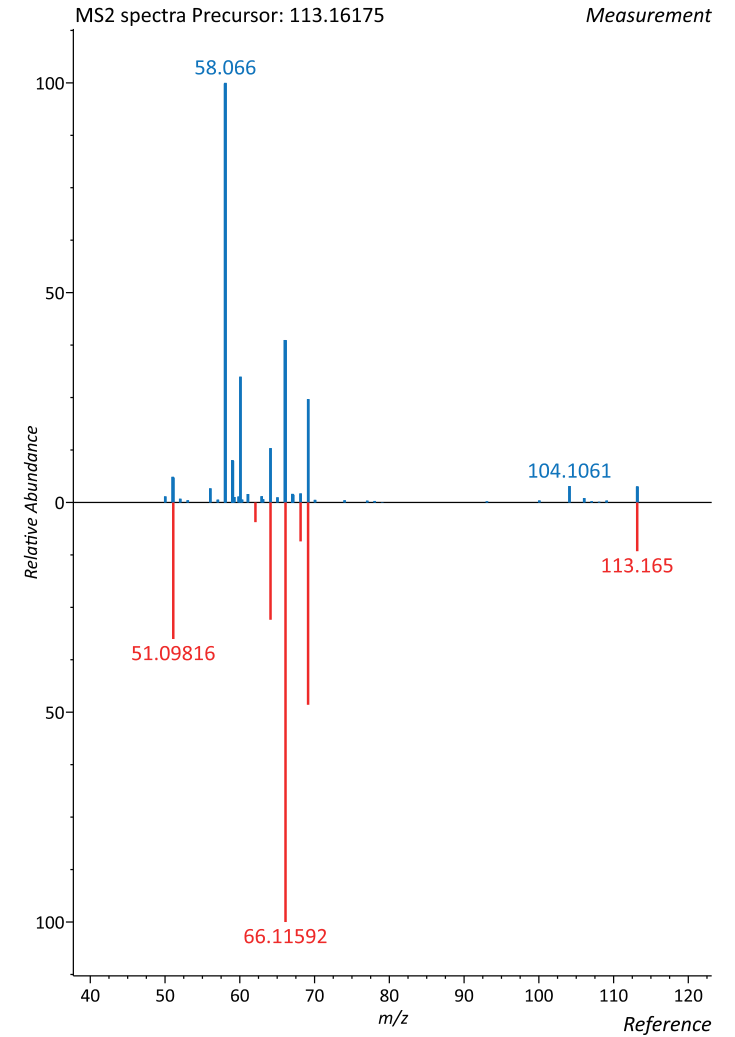

# Glutamine-D<sub>5</sub>

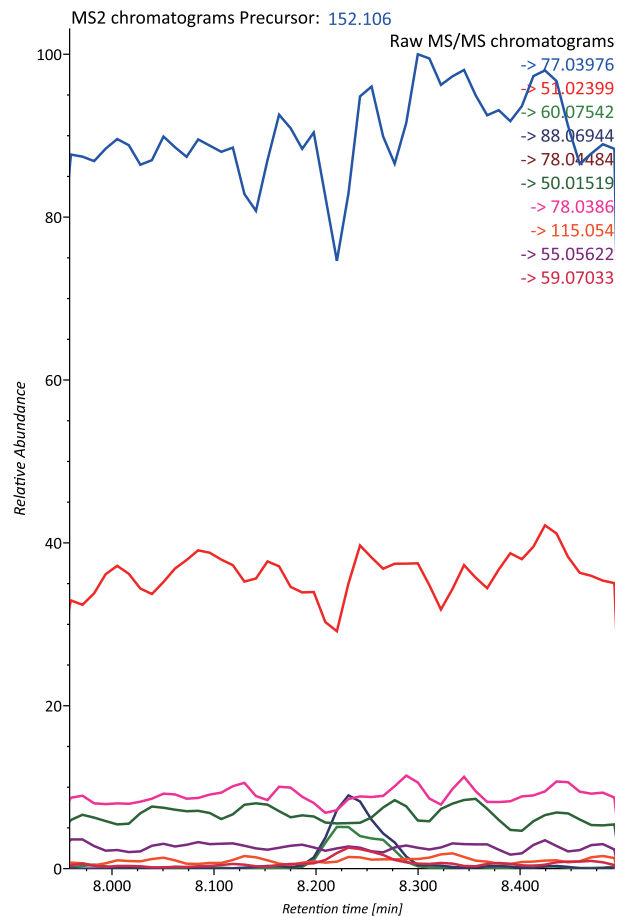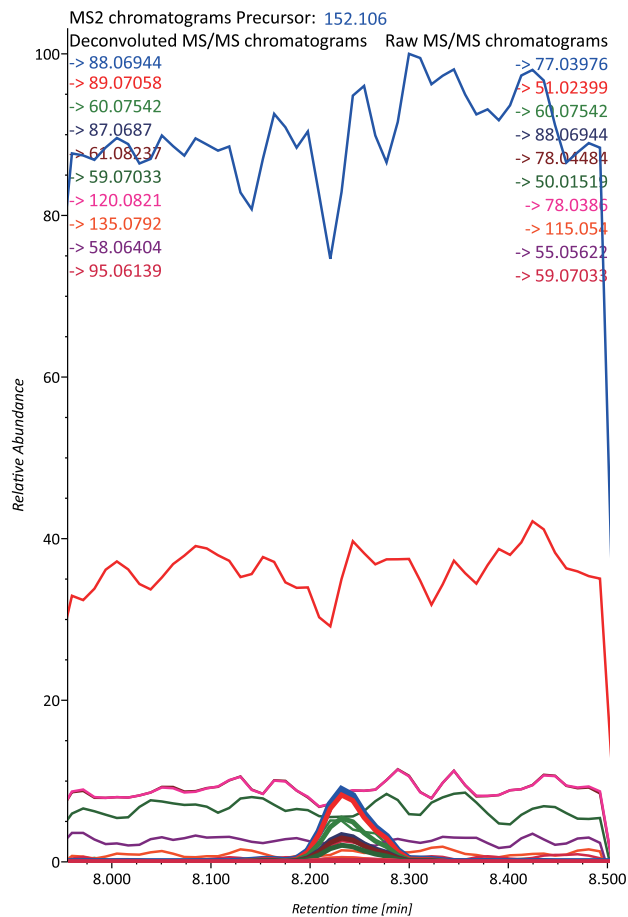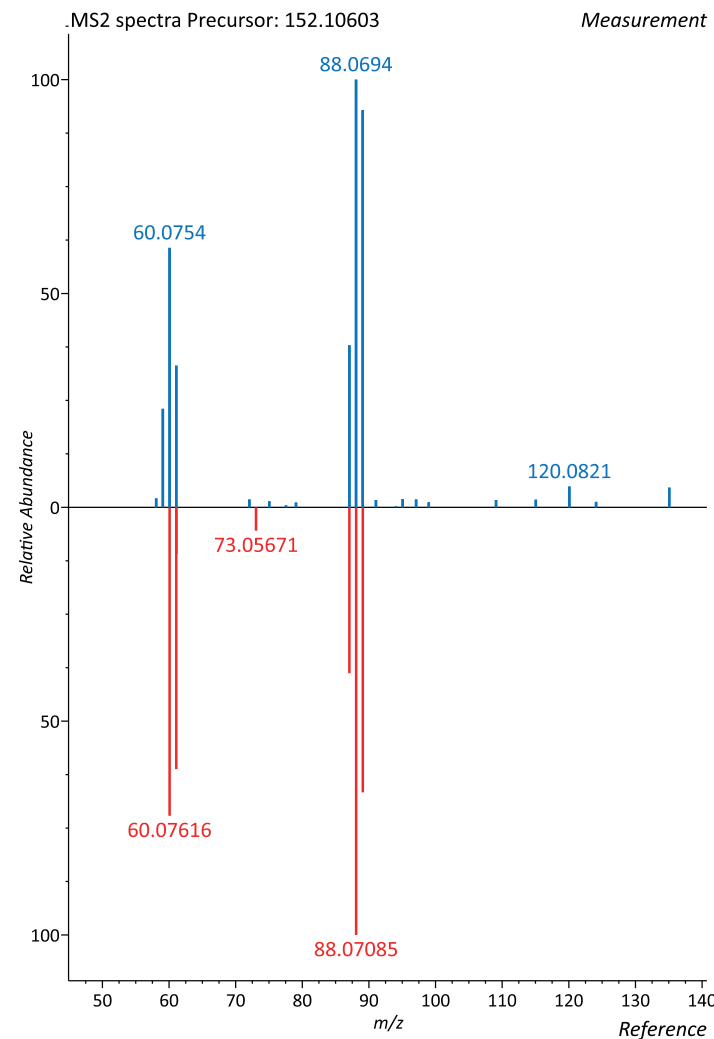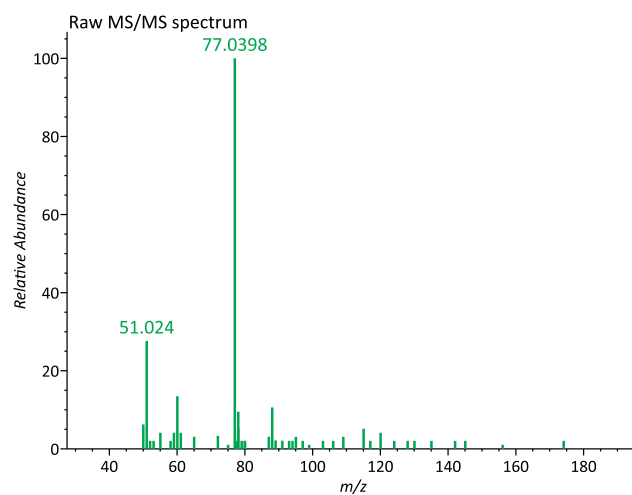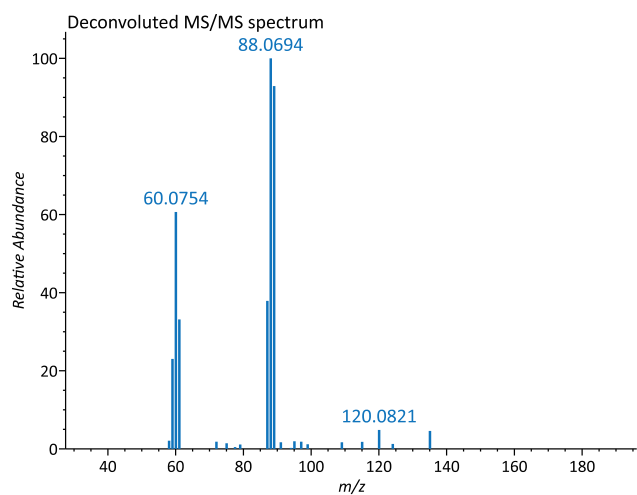

# Trimethylamine N-oxide-D<sub>9</sub> (TMAO-D<sub>9</sub>)

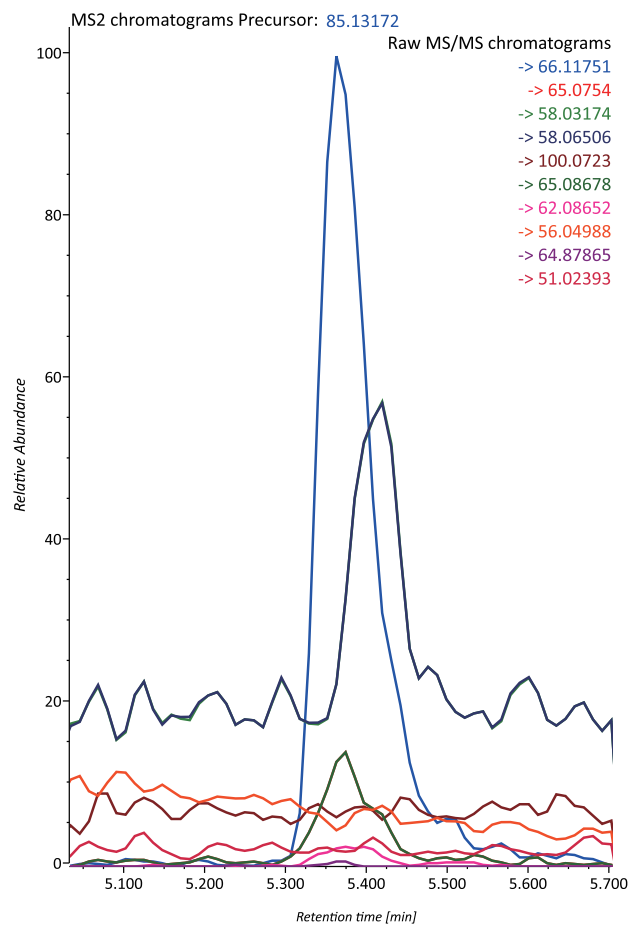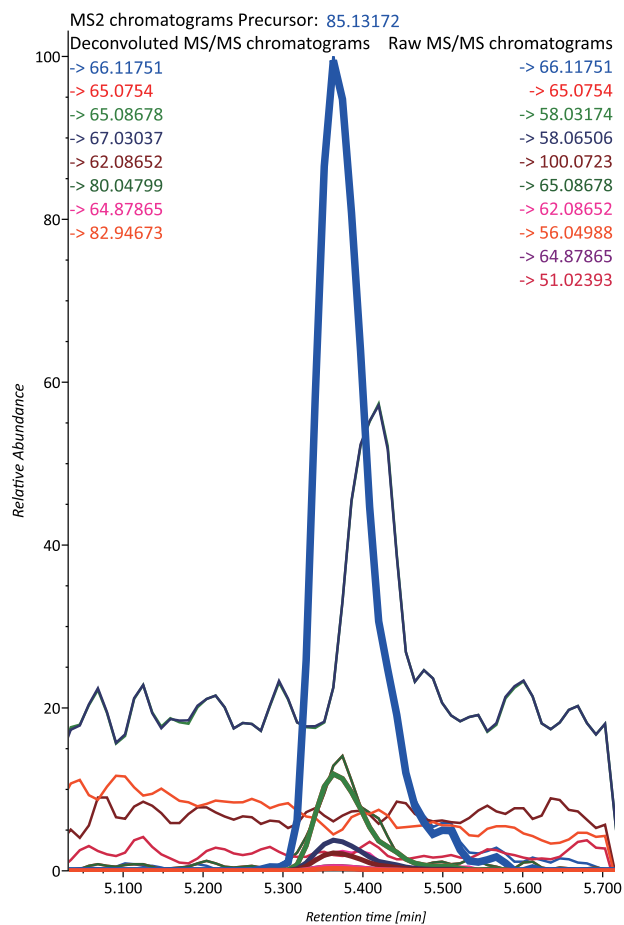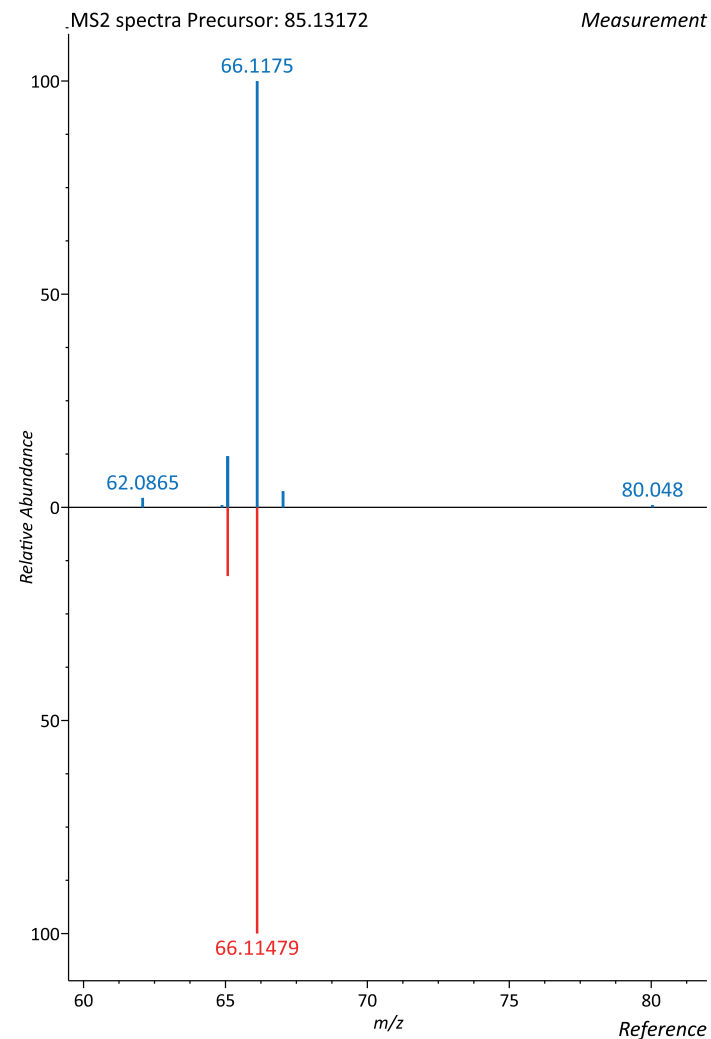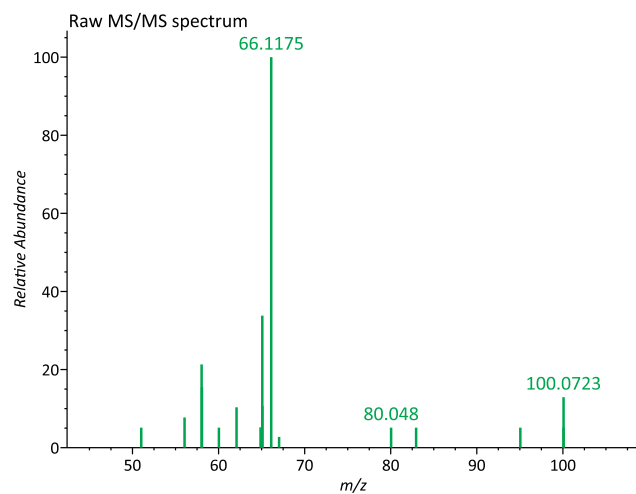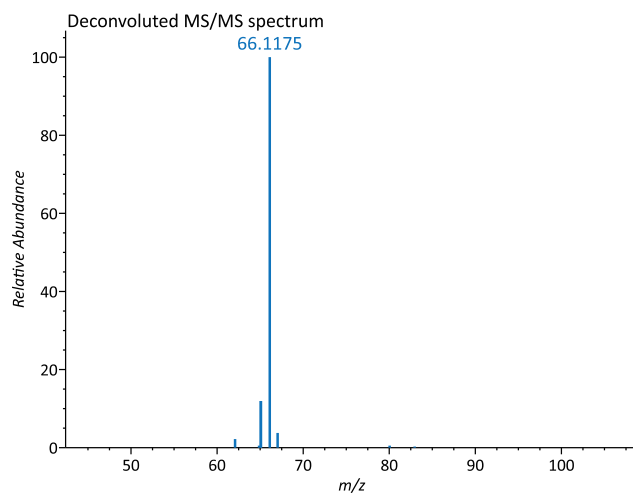

# 1,2-Benzendicarboxylic acid

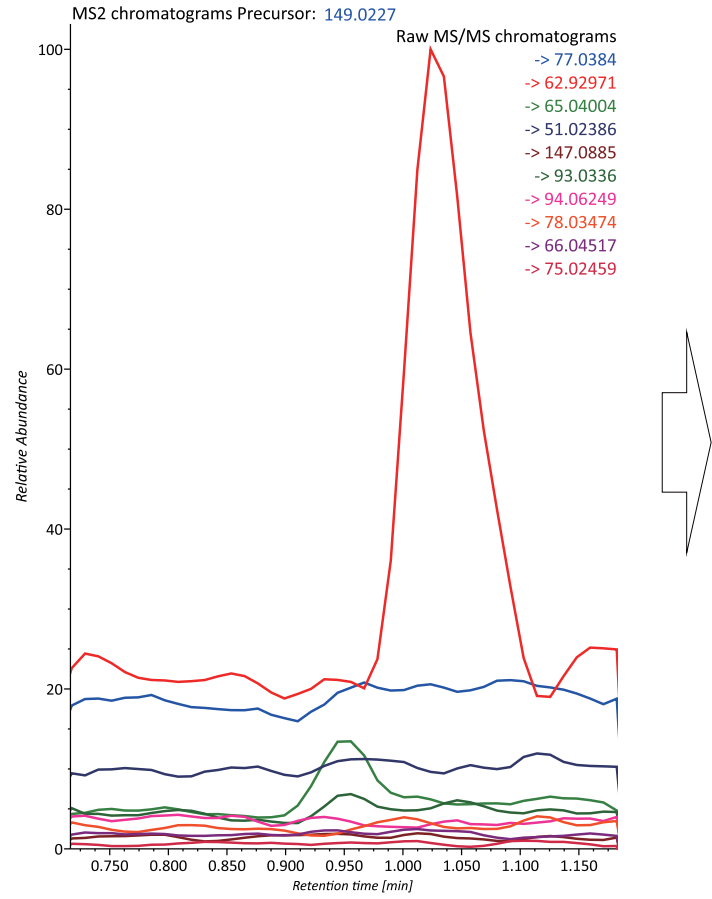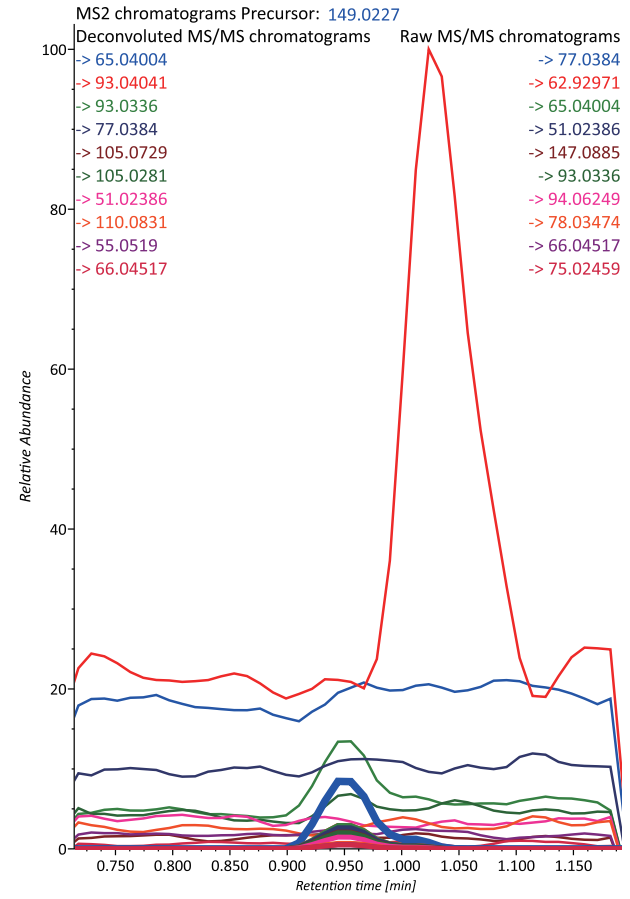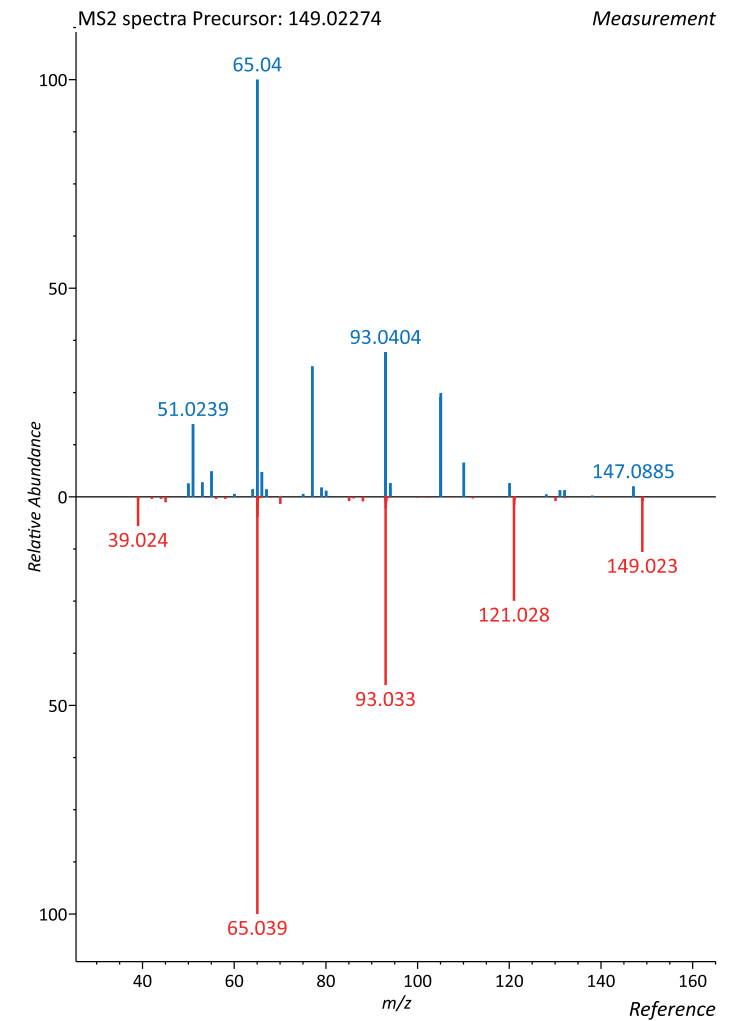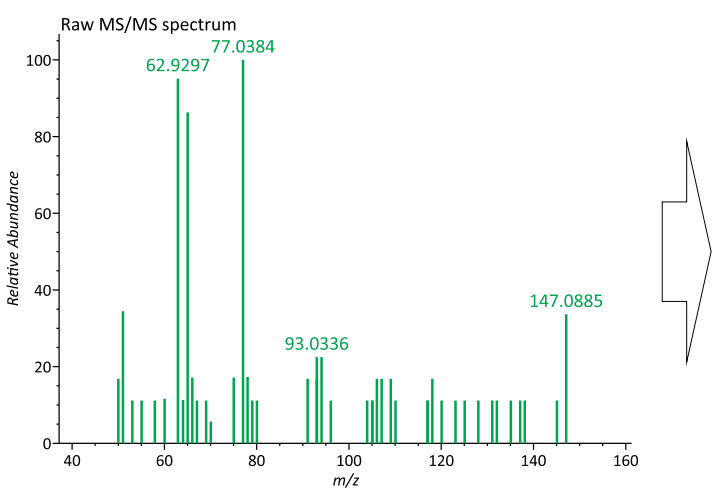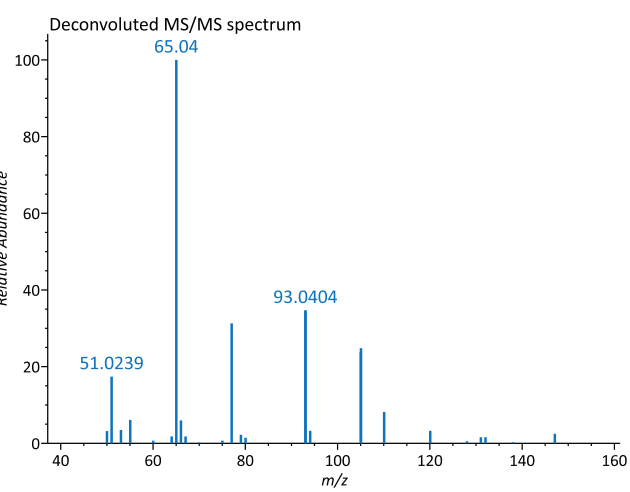

# 1-Methylhistamine

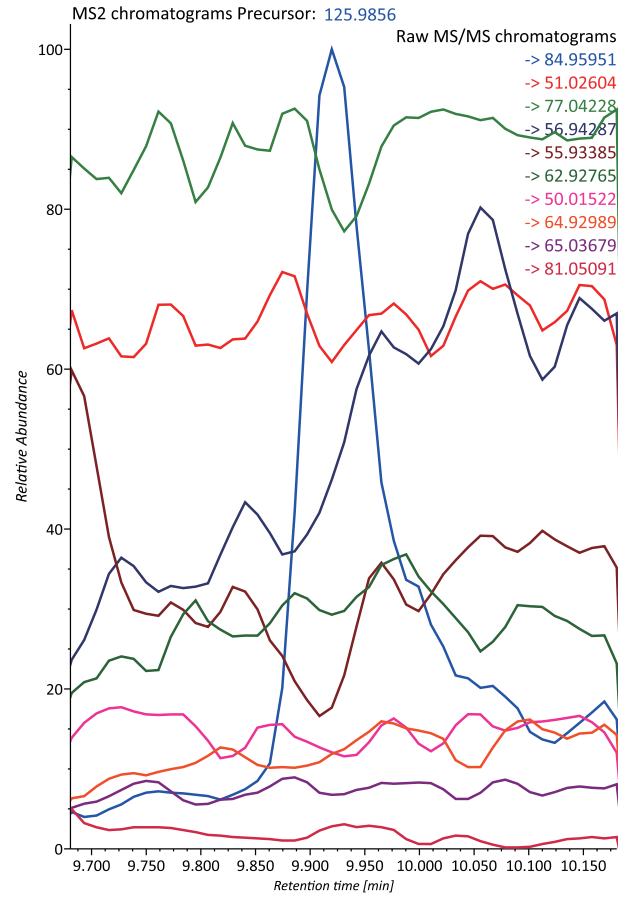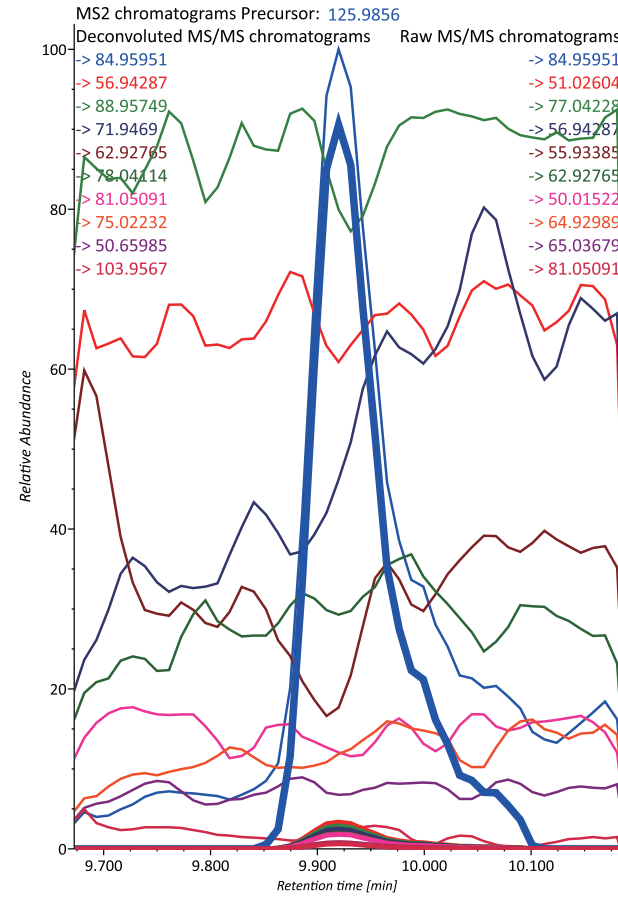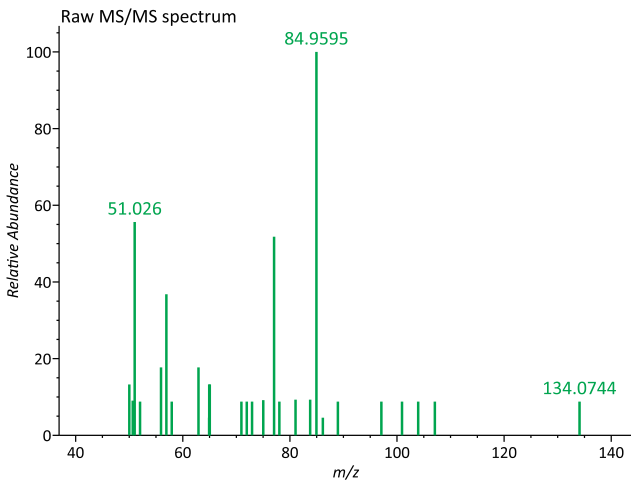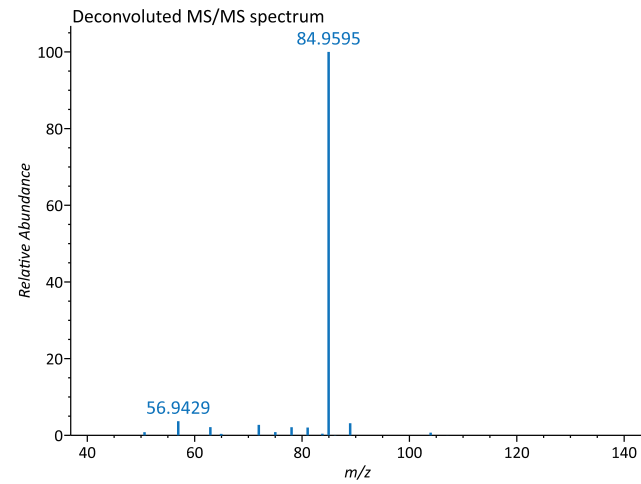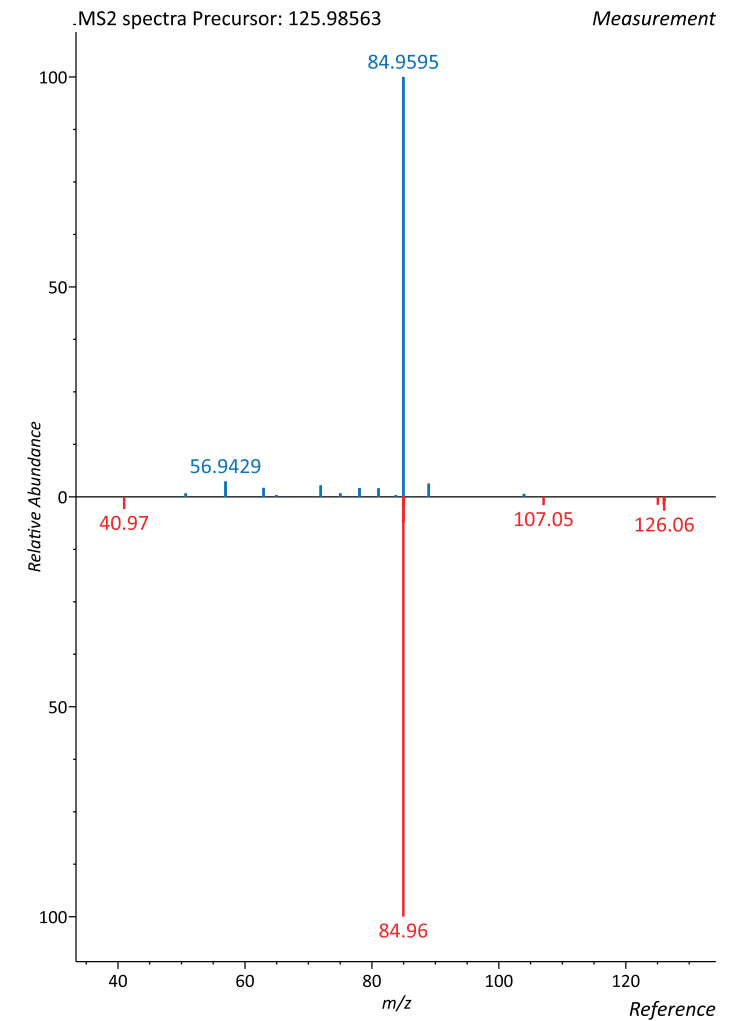



# PC (14:0/0:0)

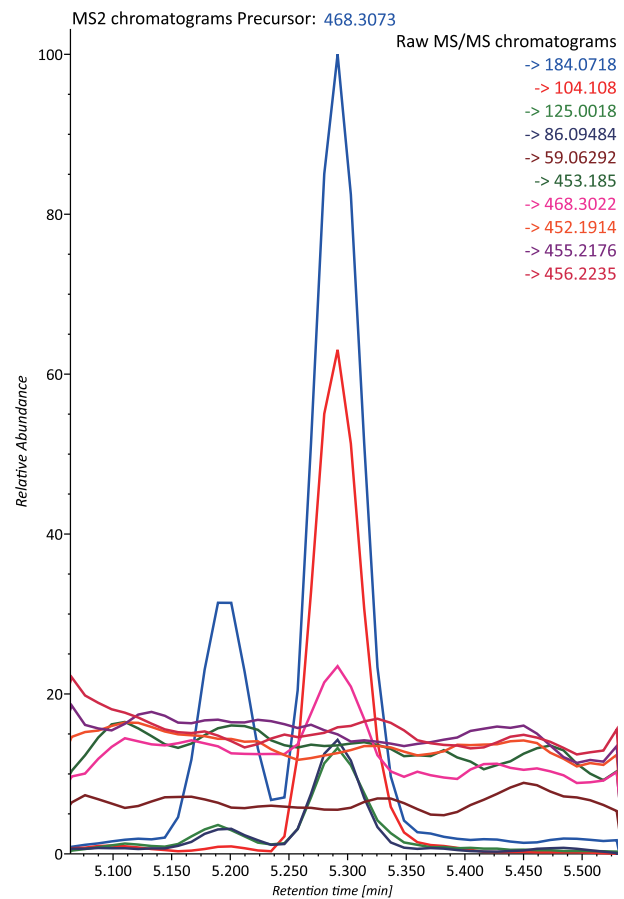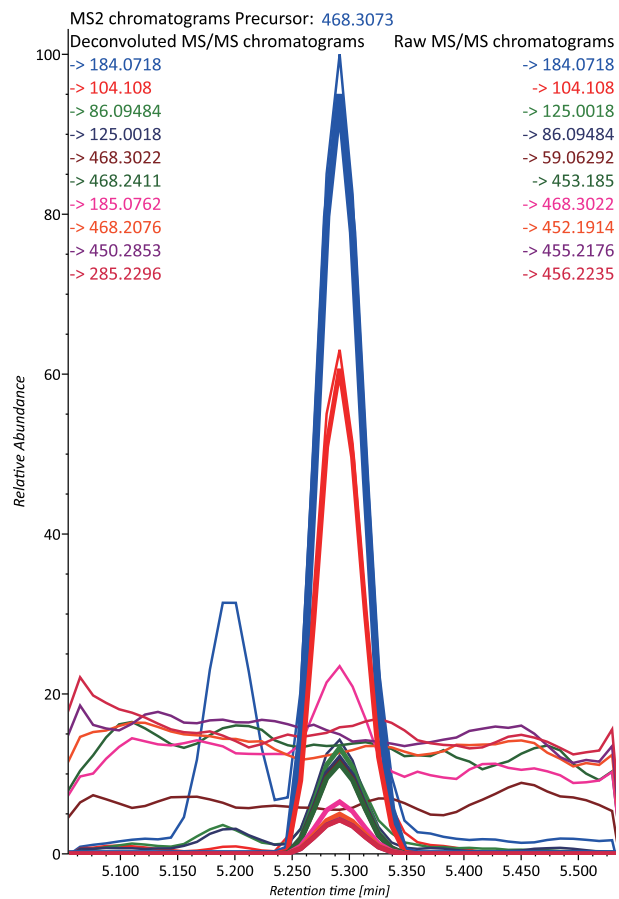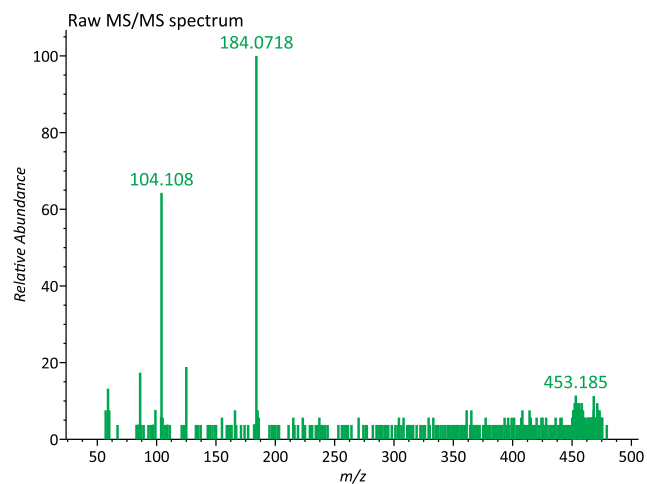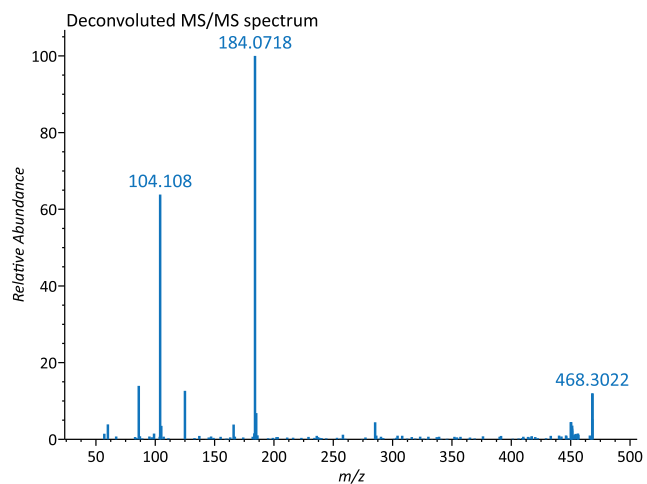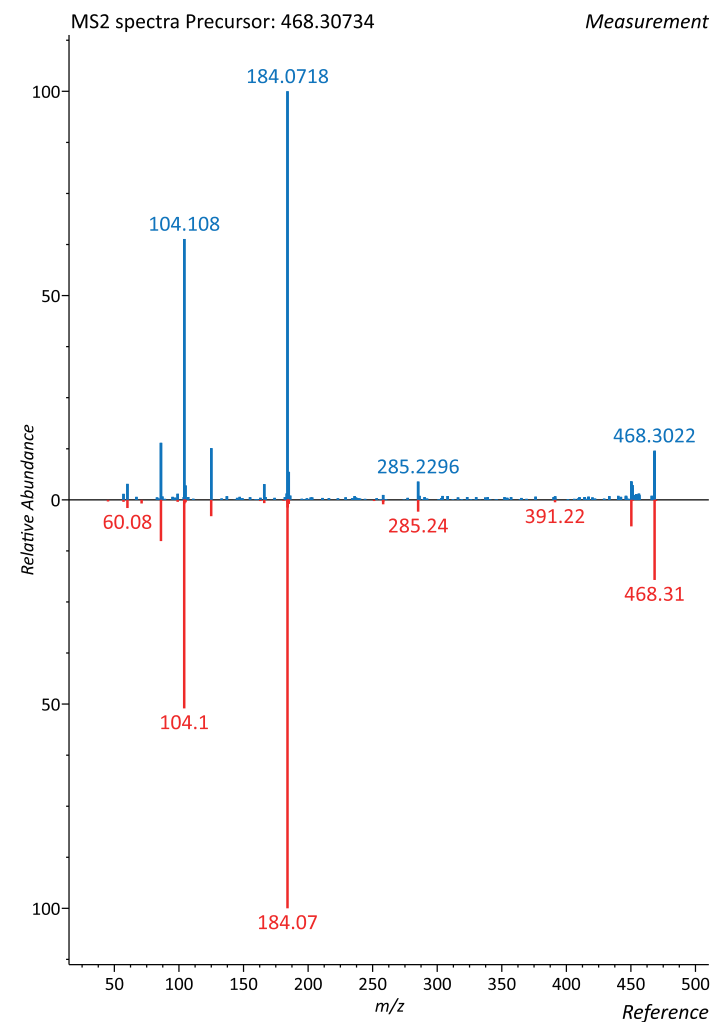

# 2-Amino-1-phenylethanol

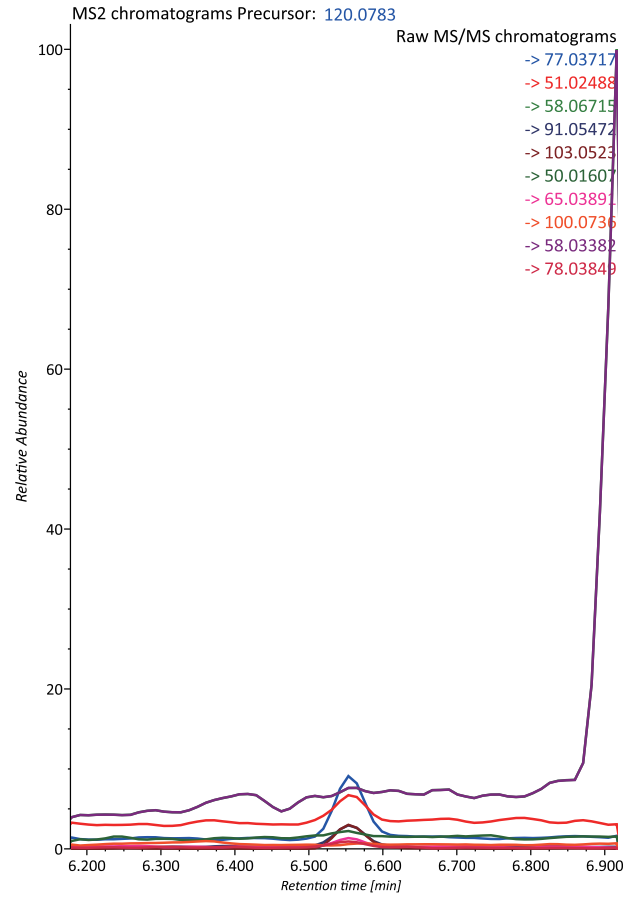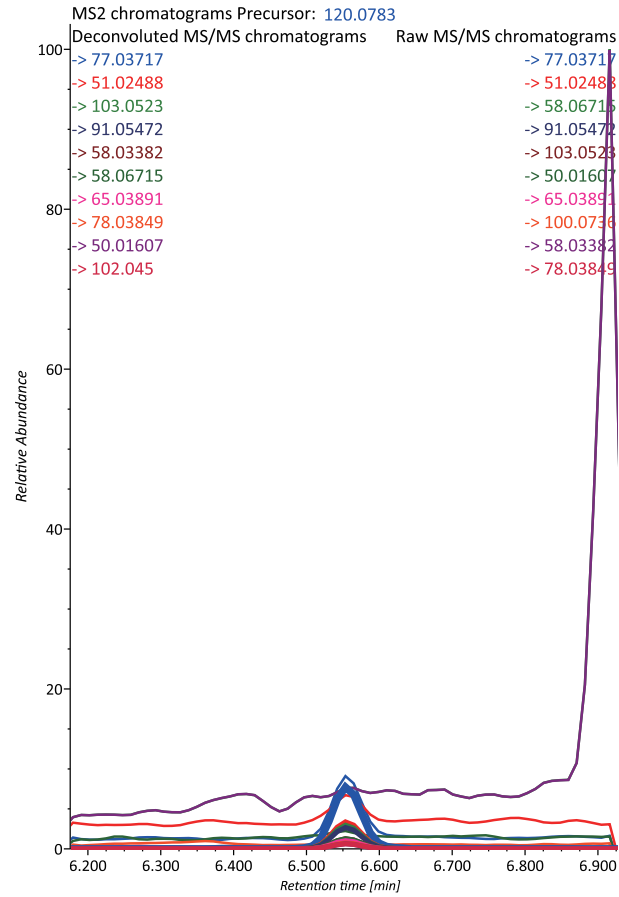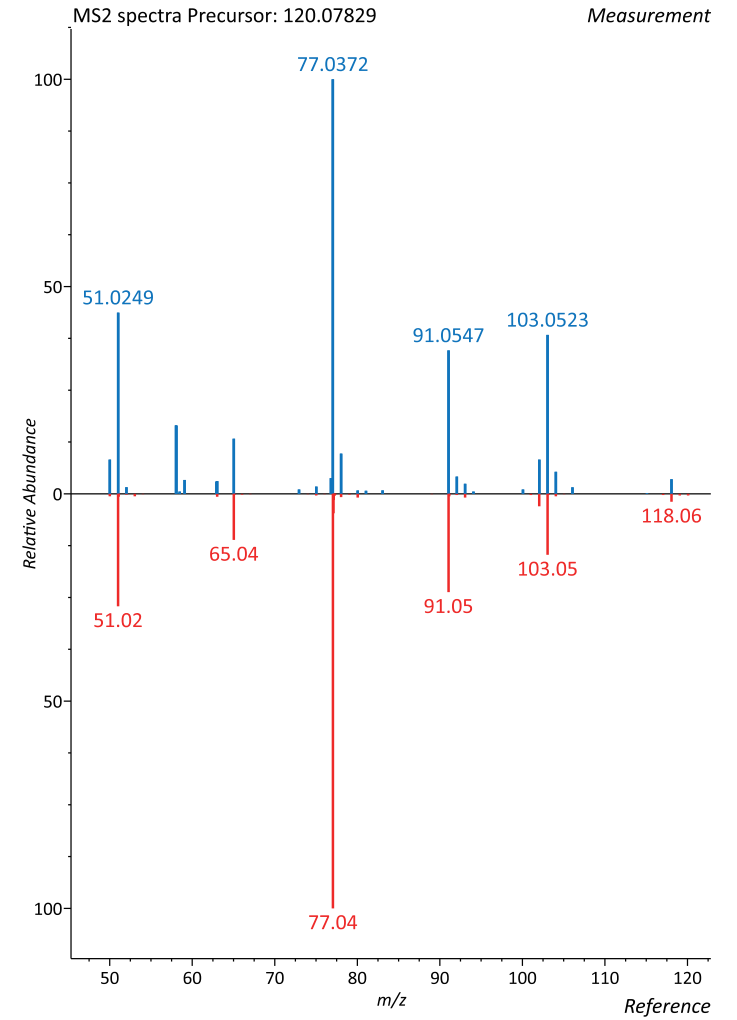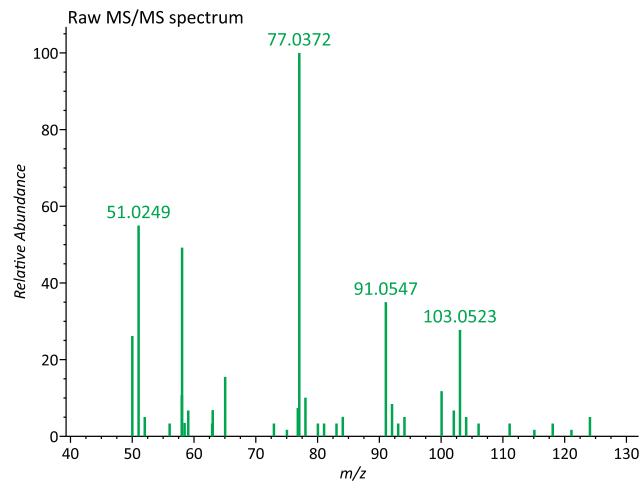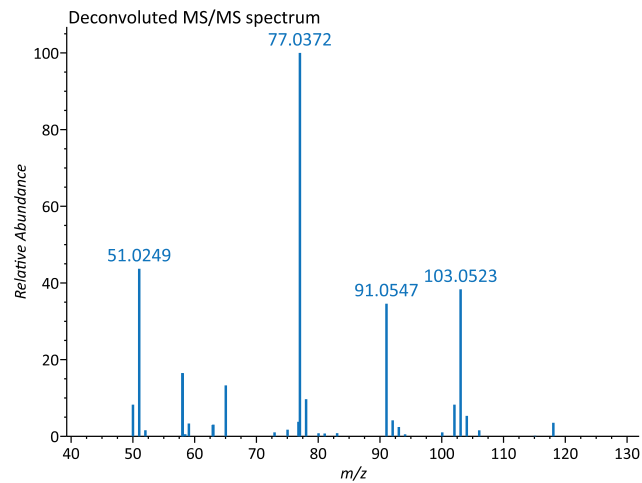

# 3-Phenoxy-1-propanol

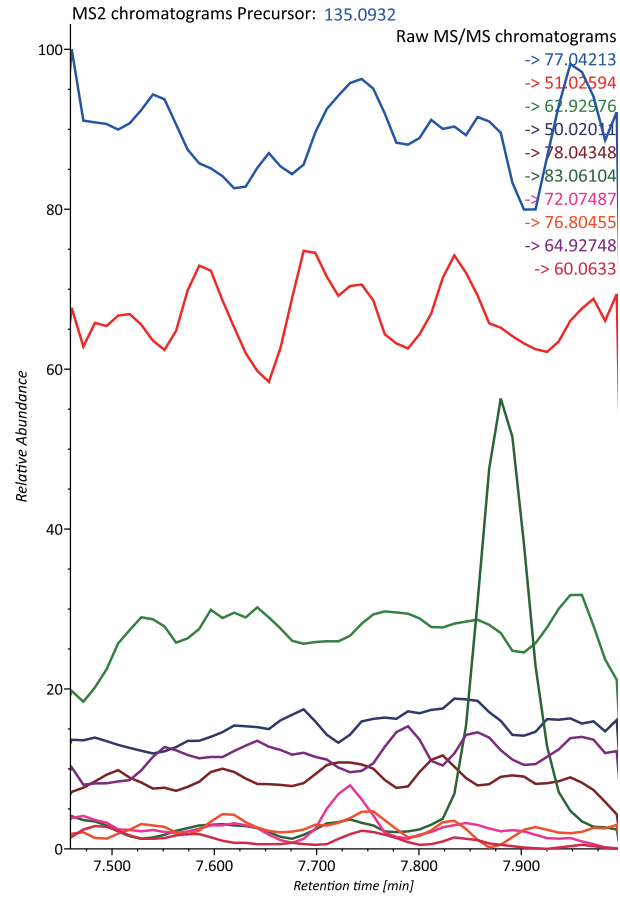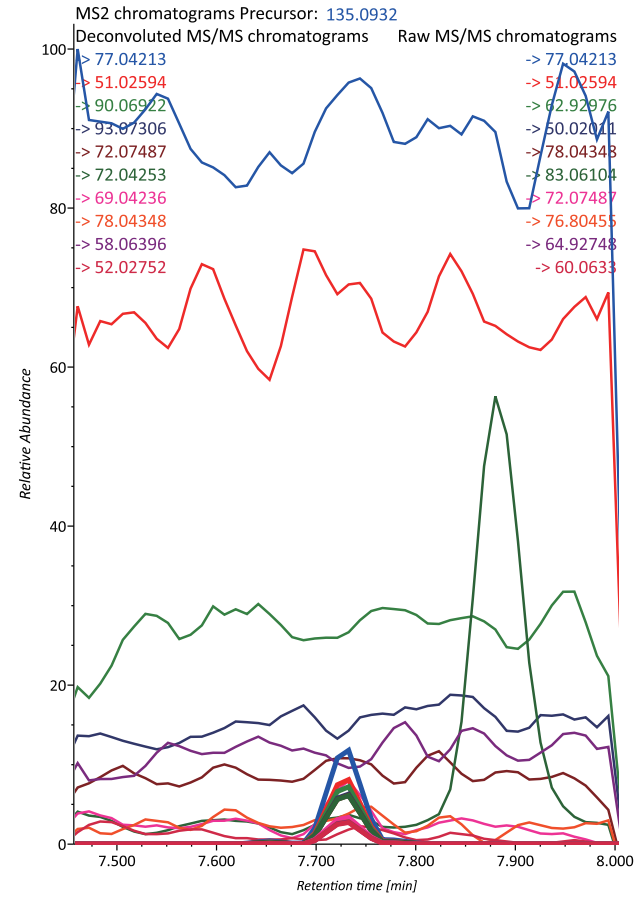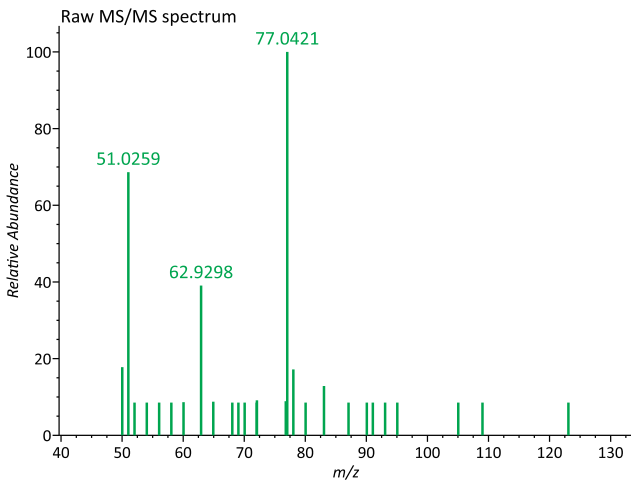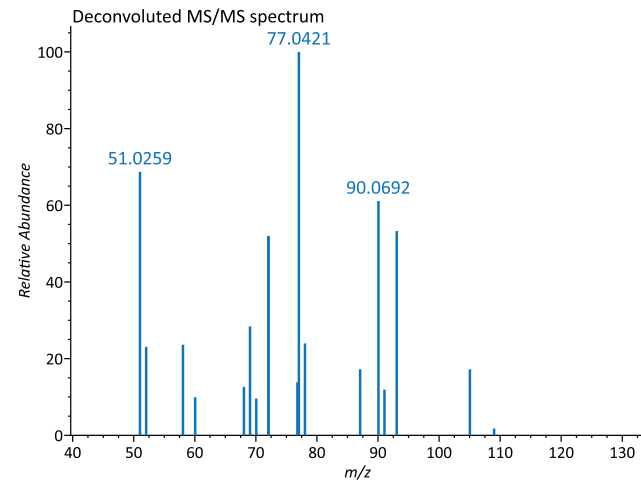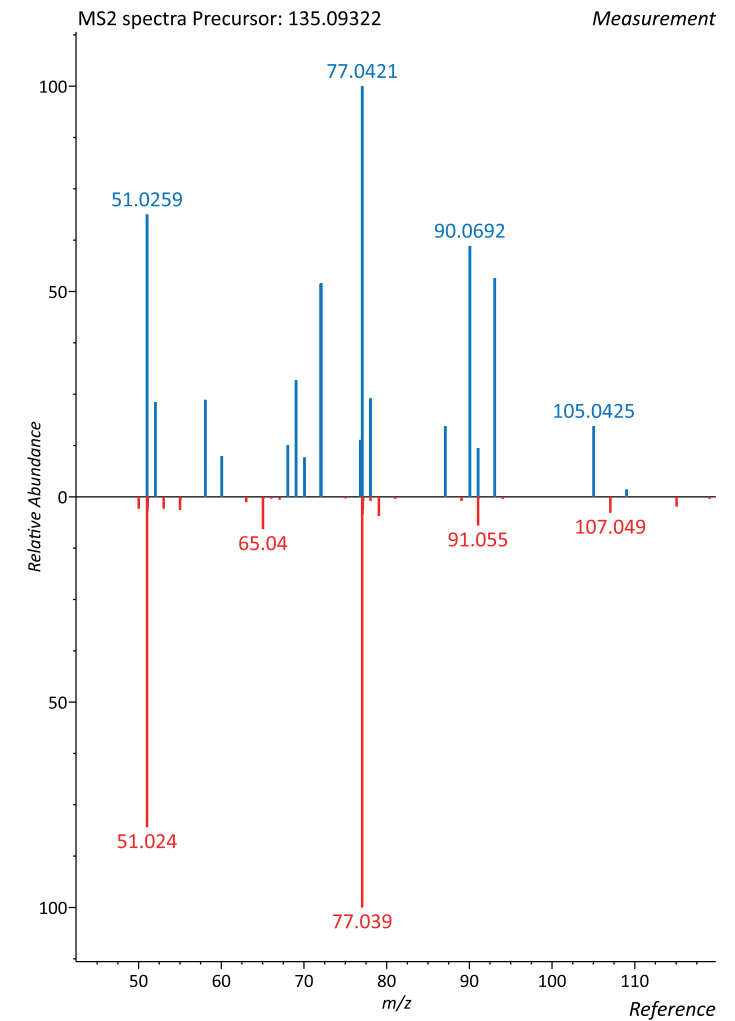

# 5-Aminovaleric acid

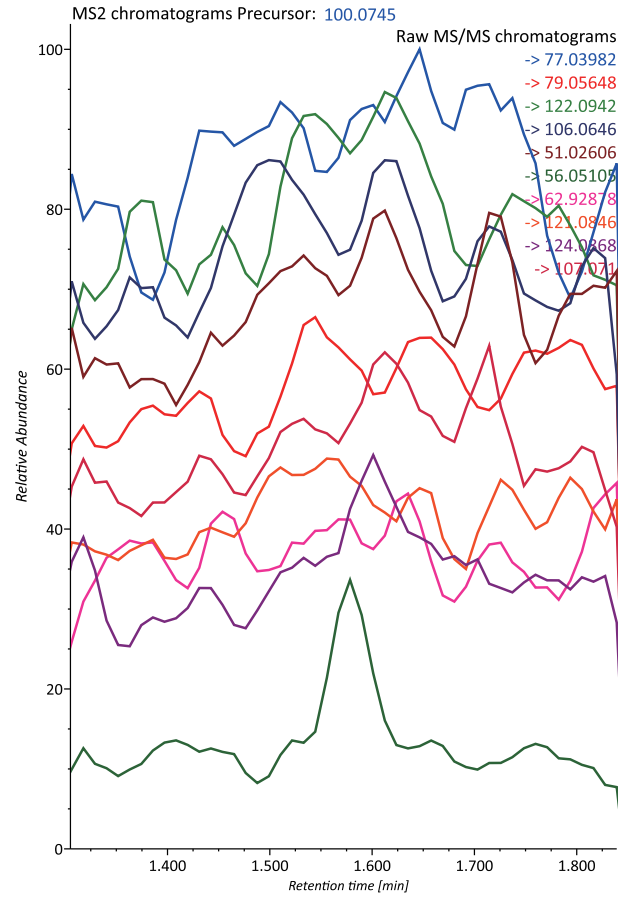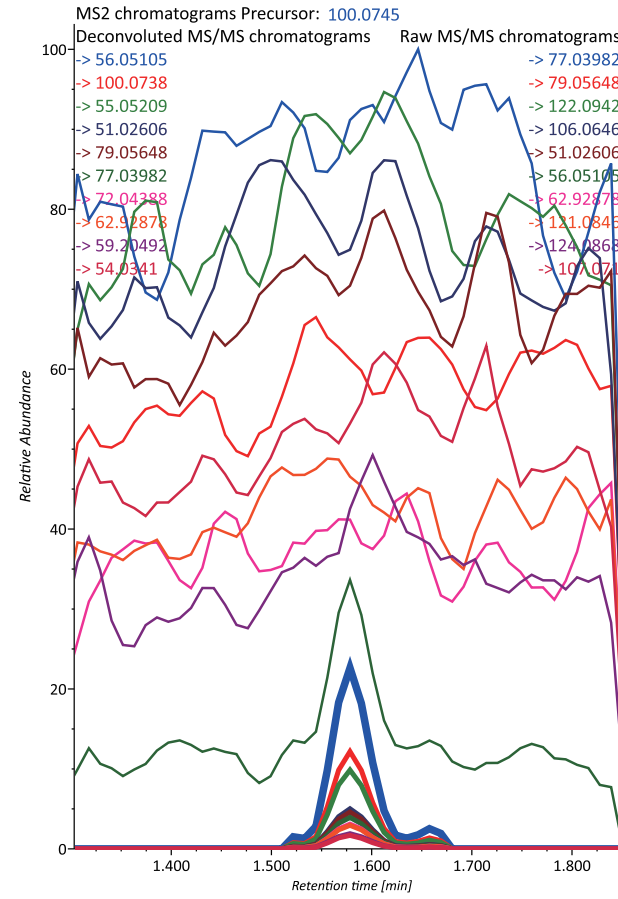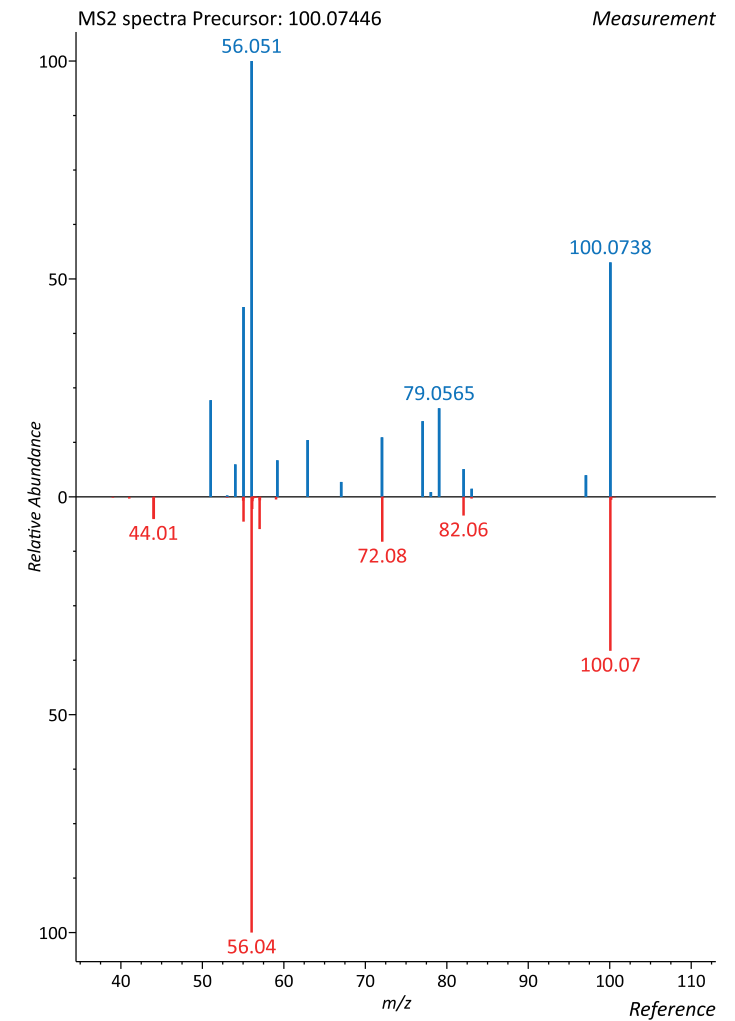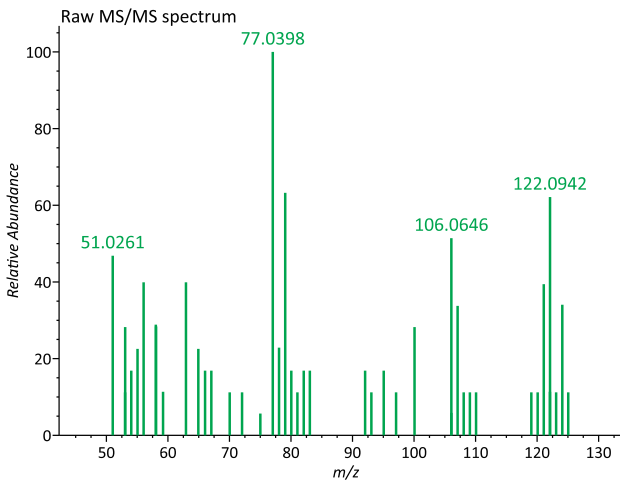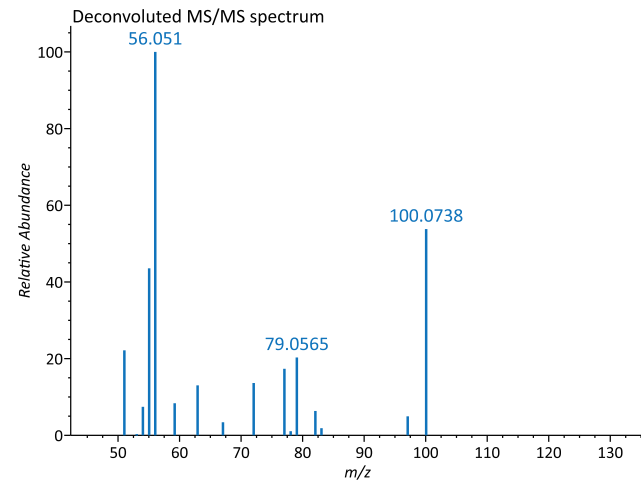

# Acetylcarnitine

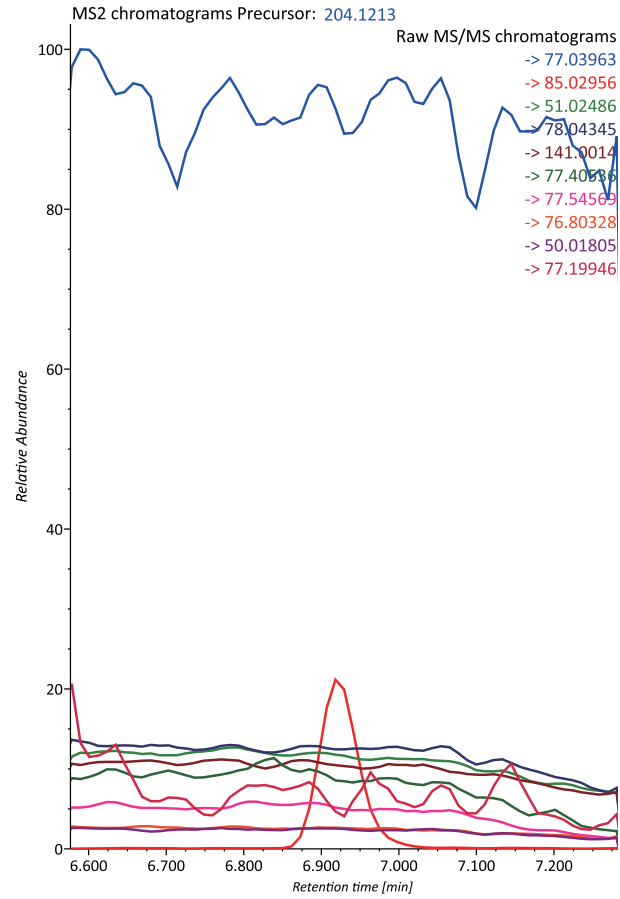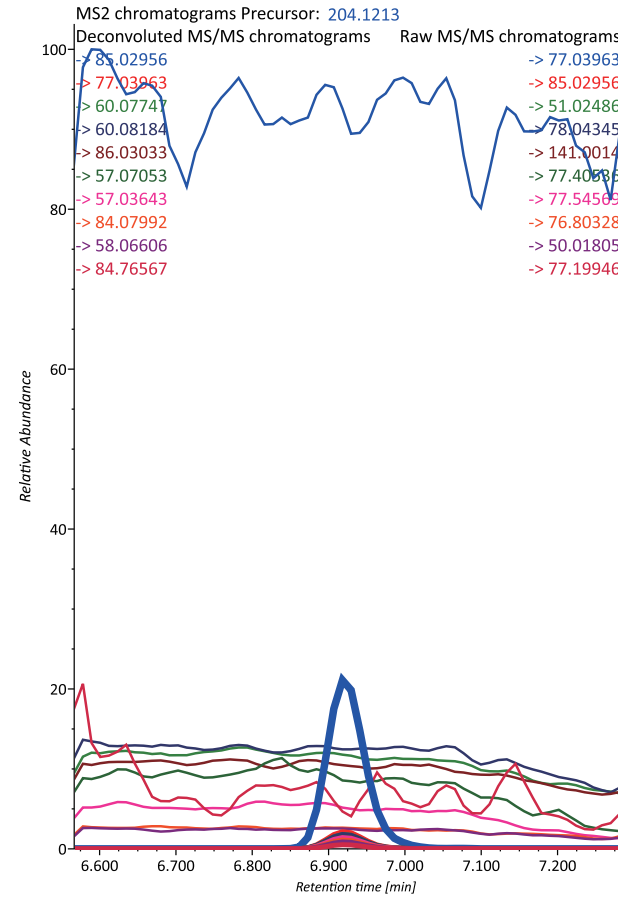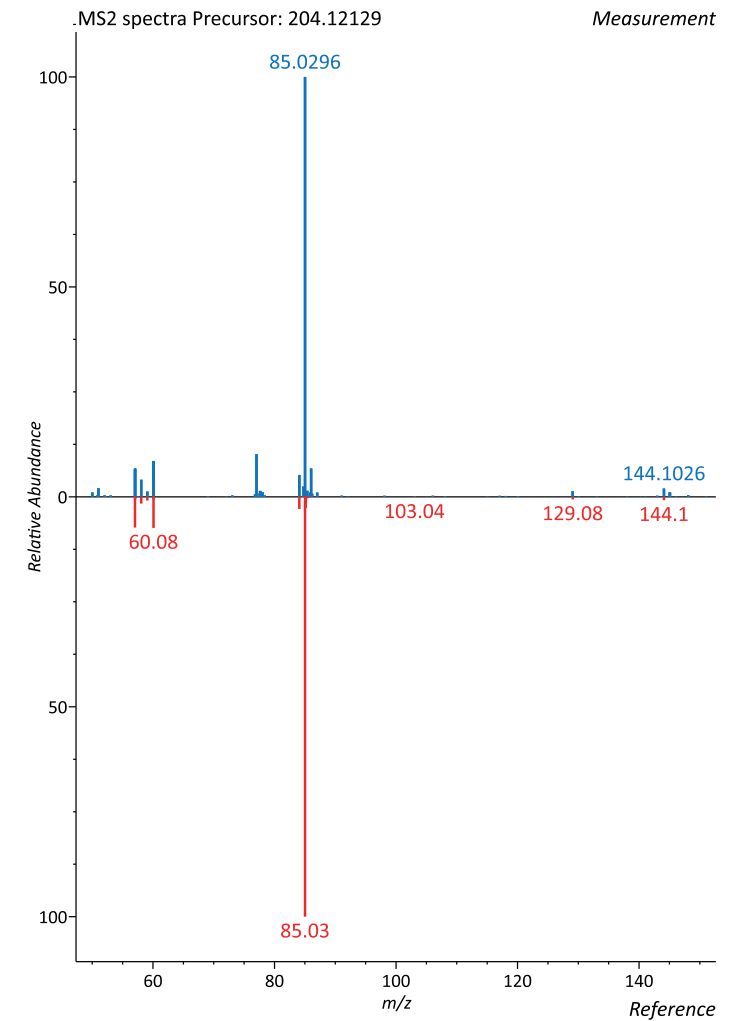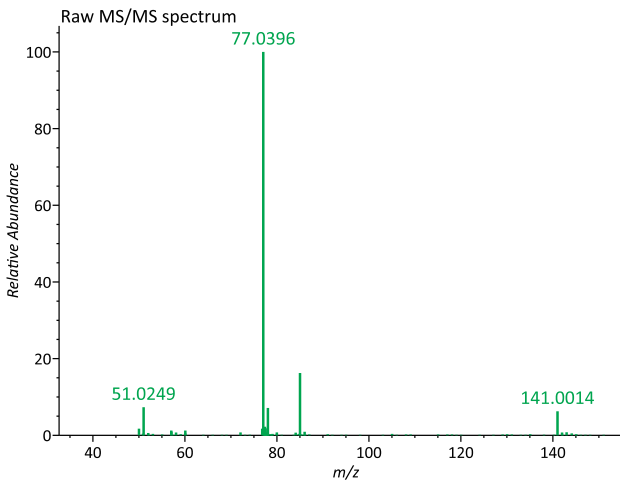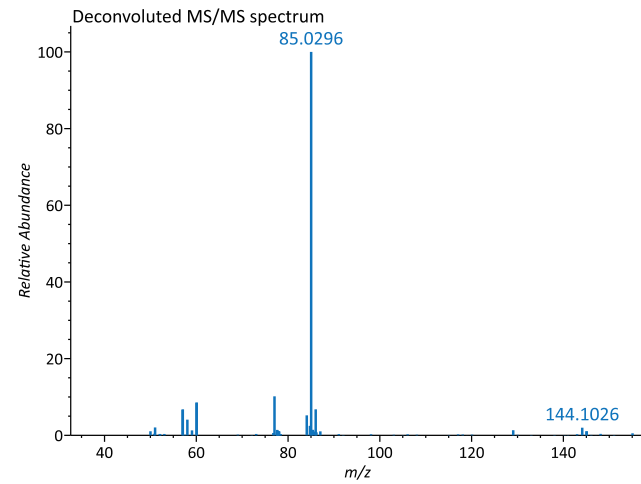

# Arginine

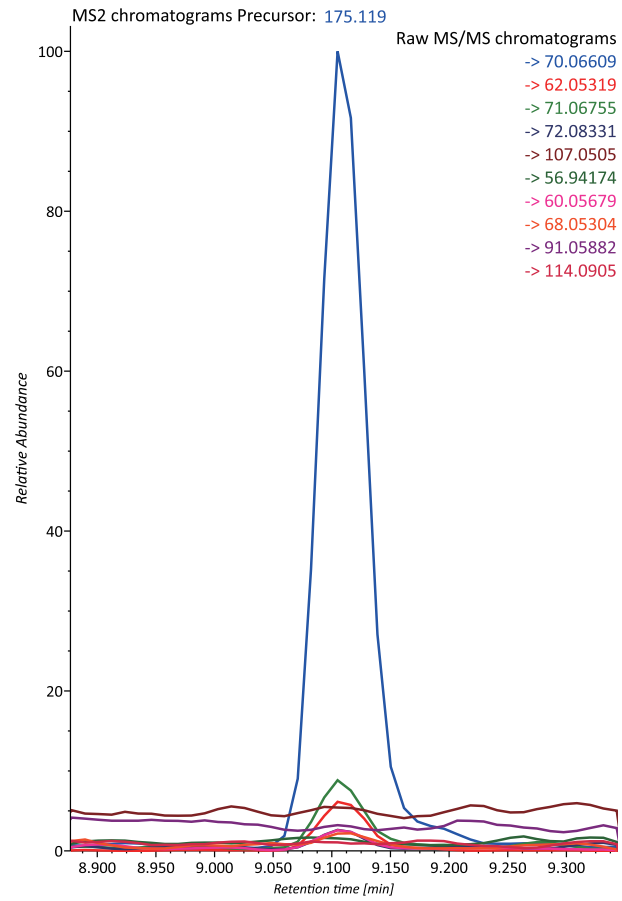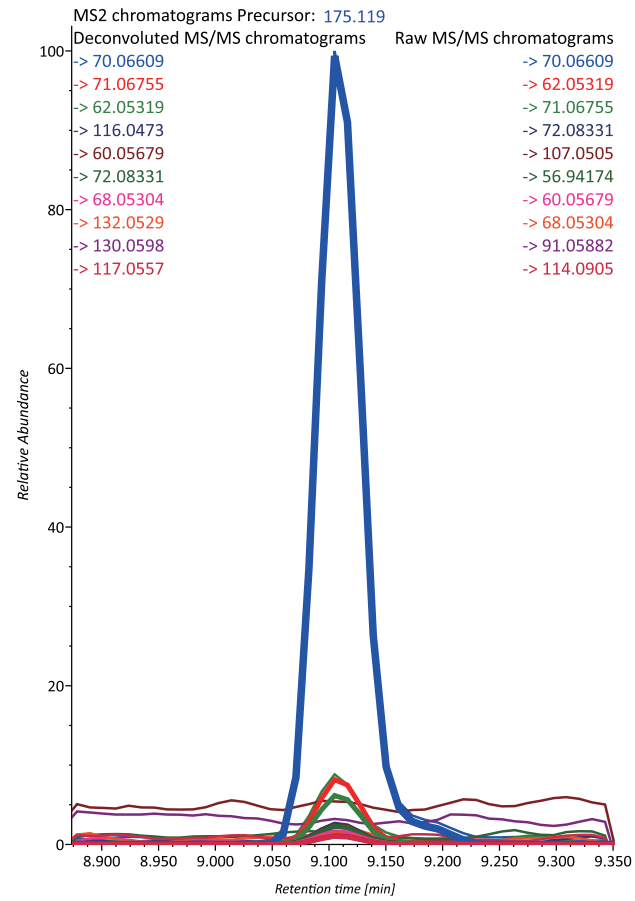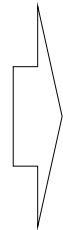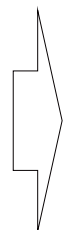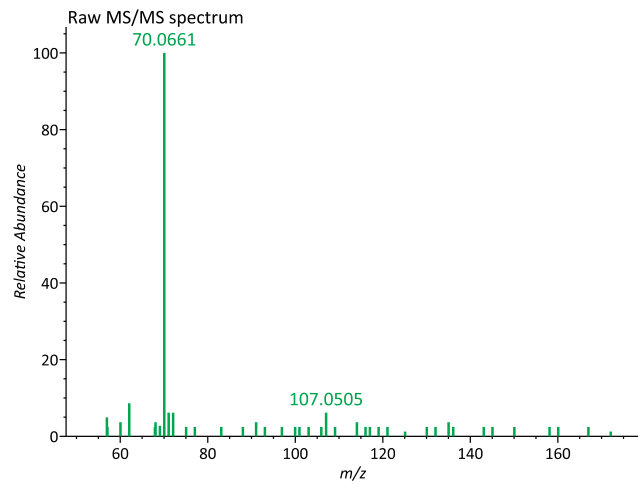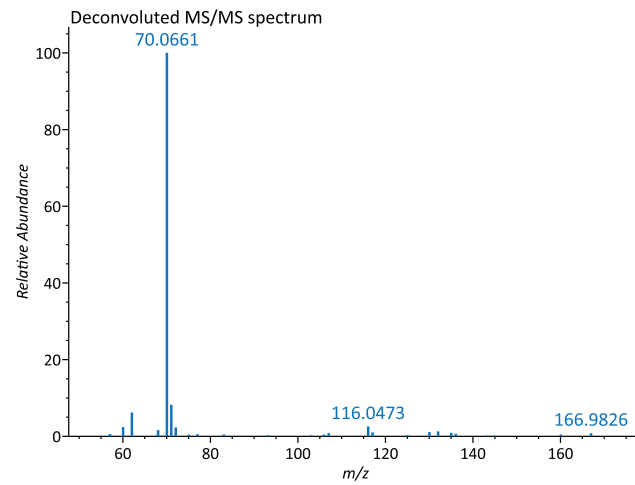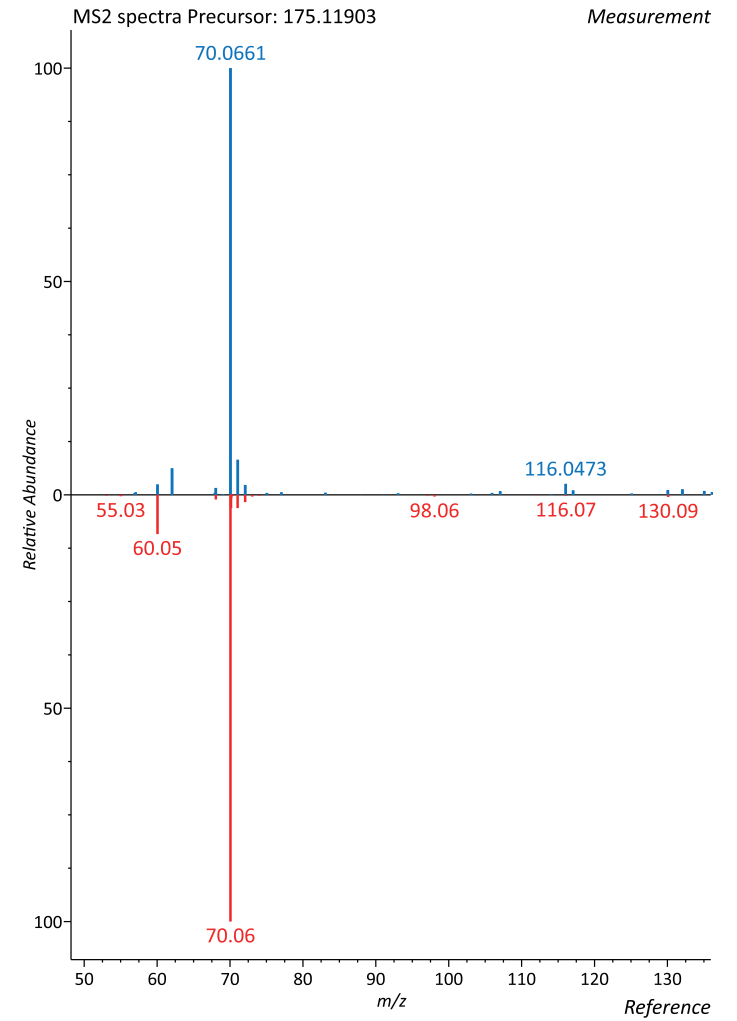

# Atenolol

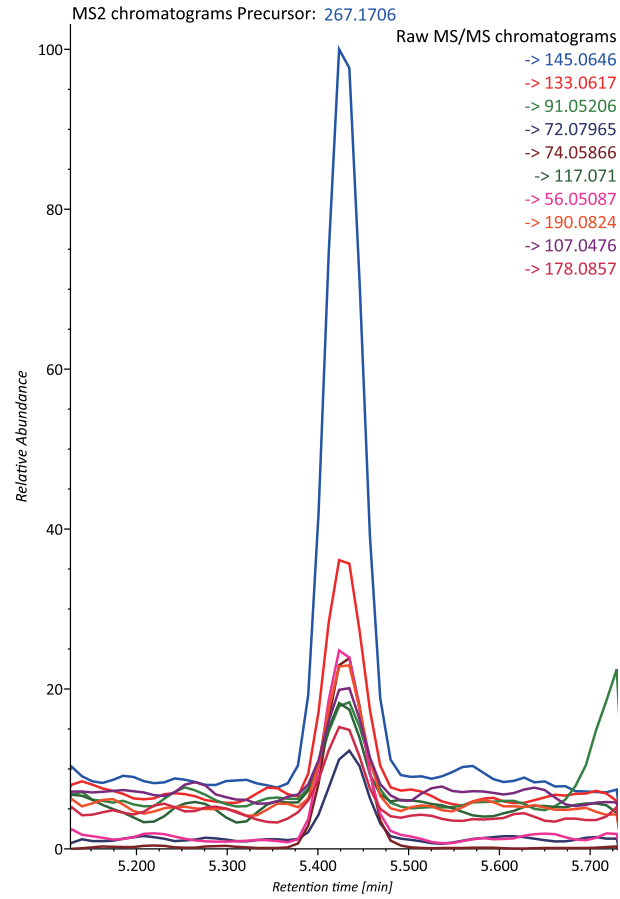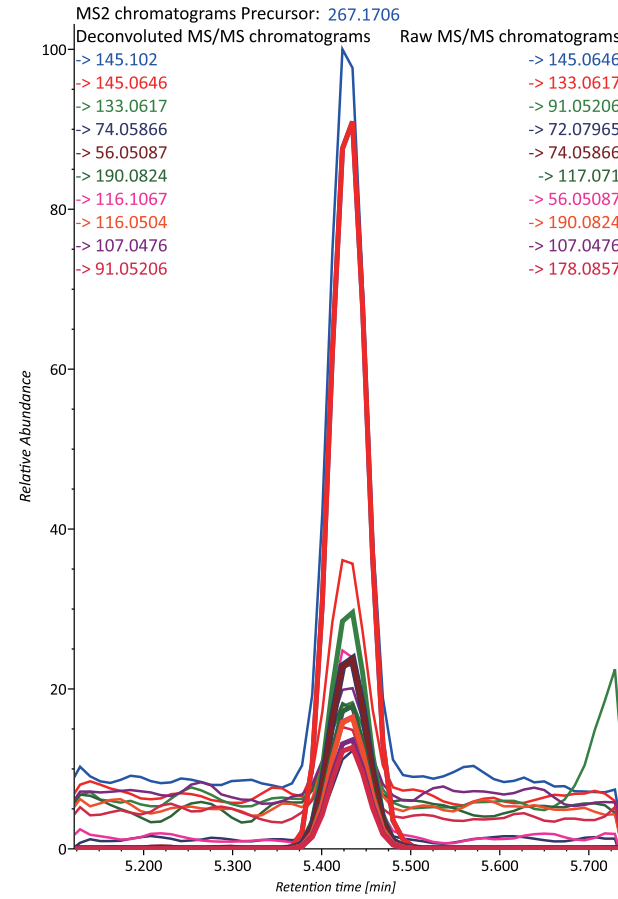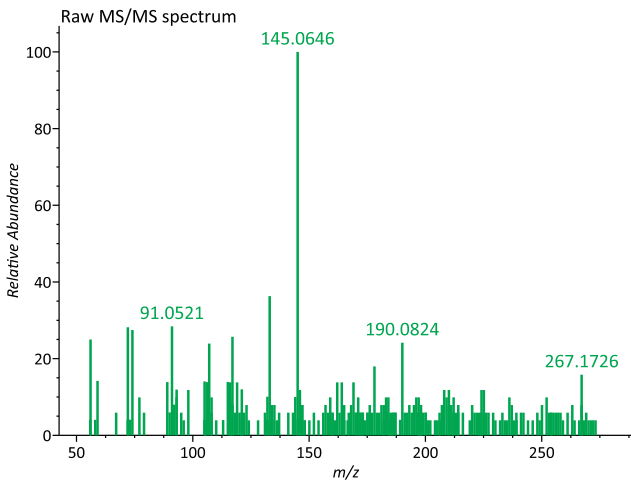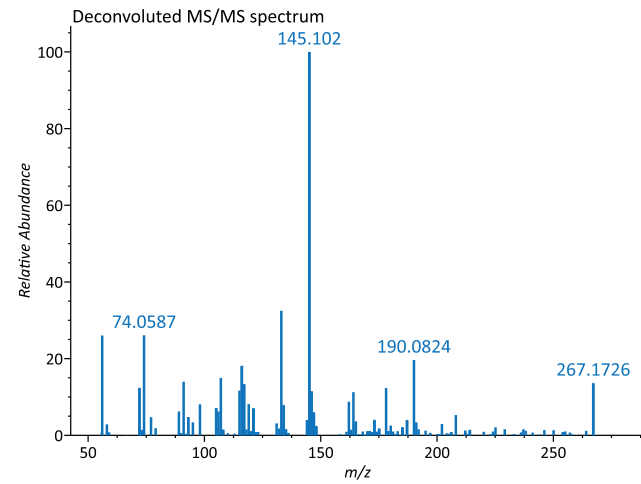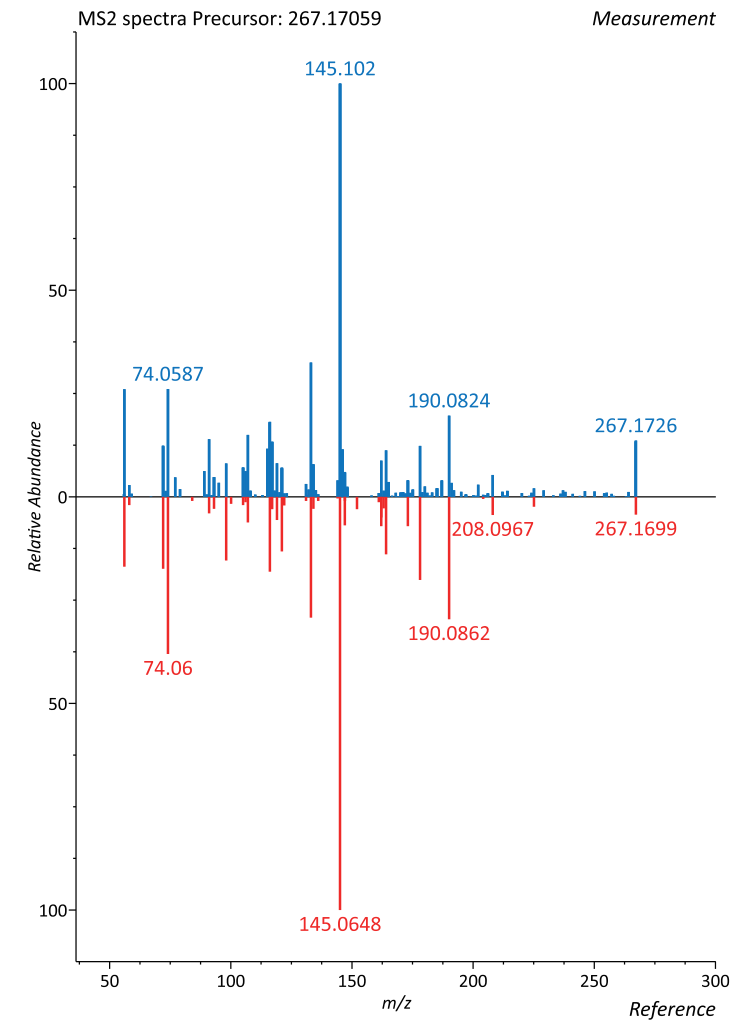

# Betaine

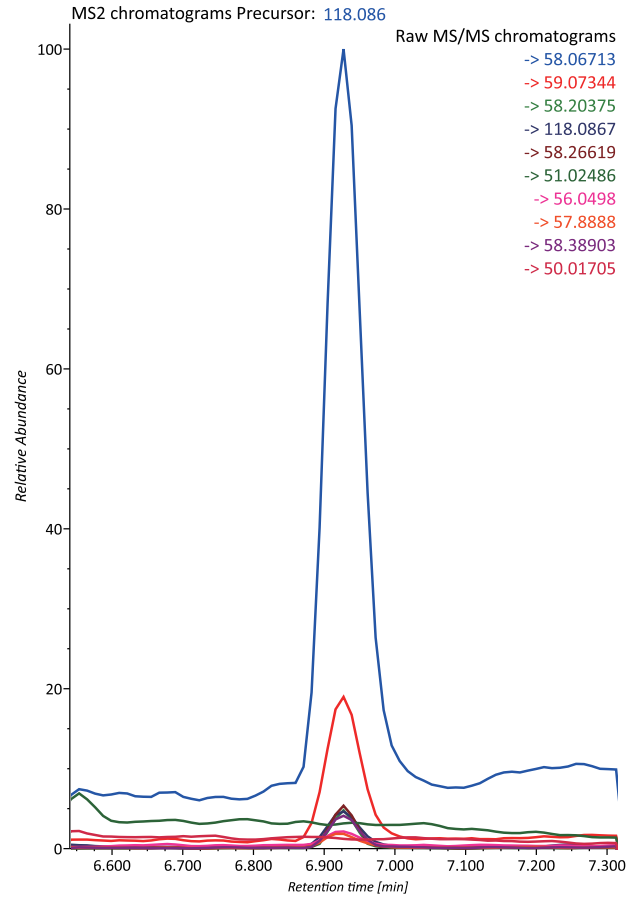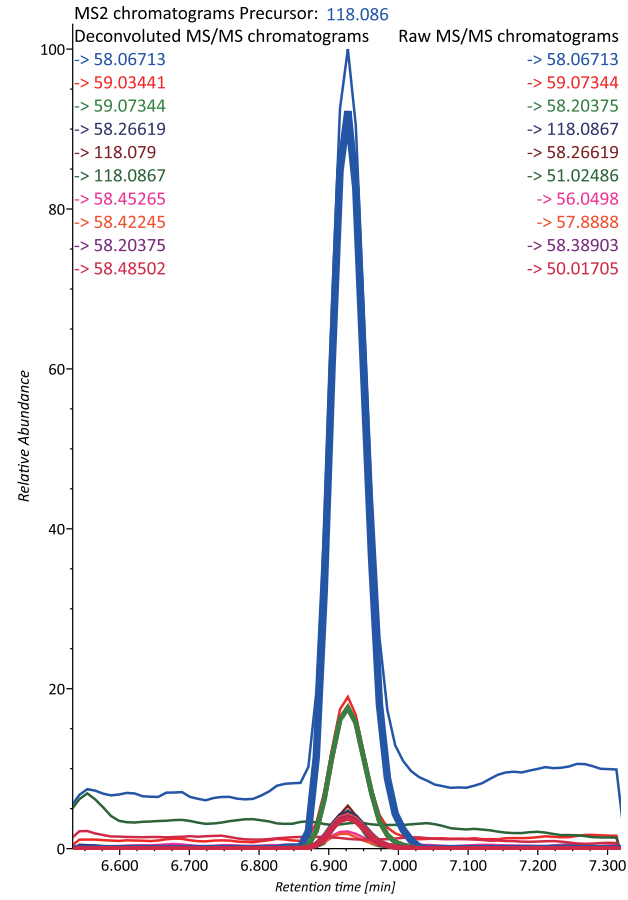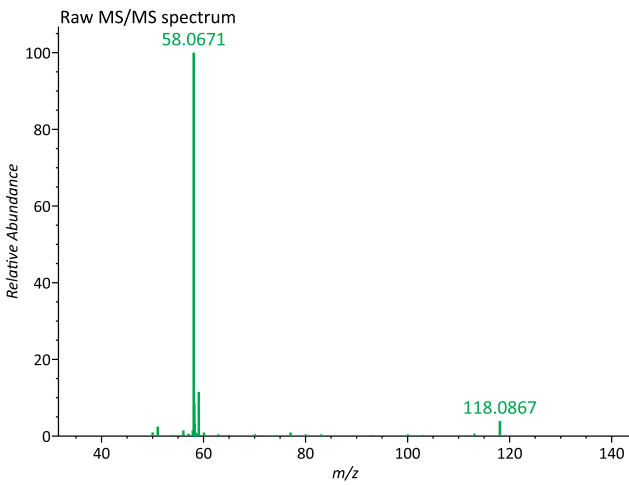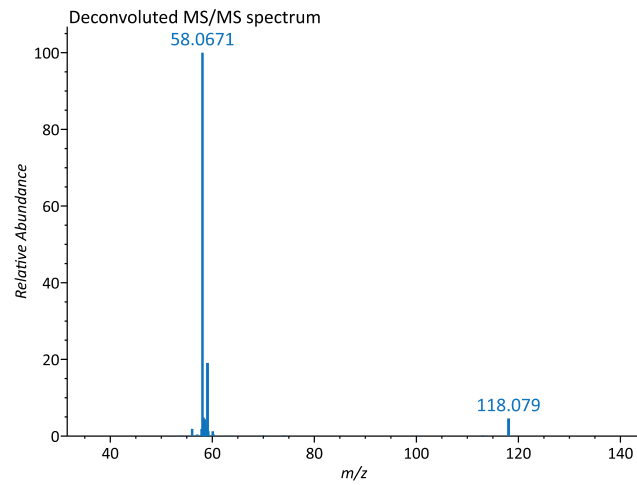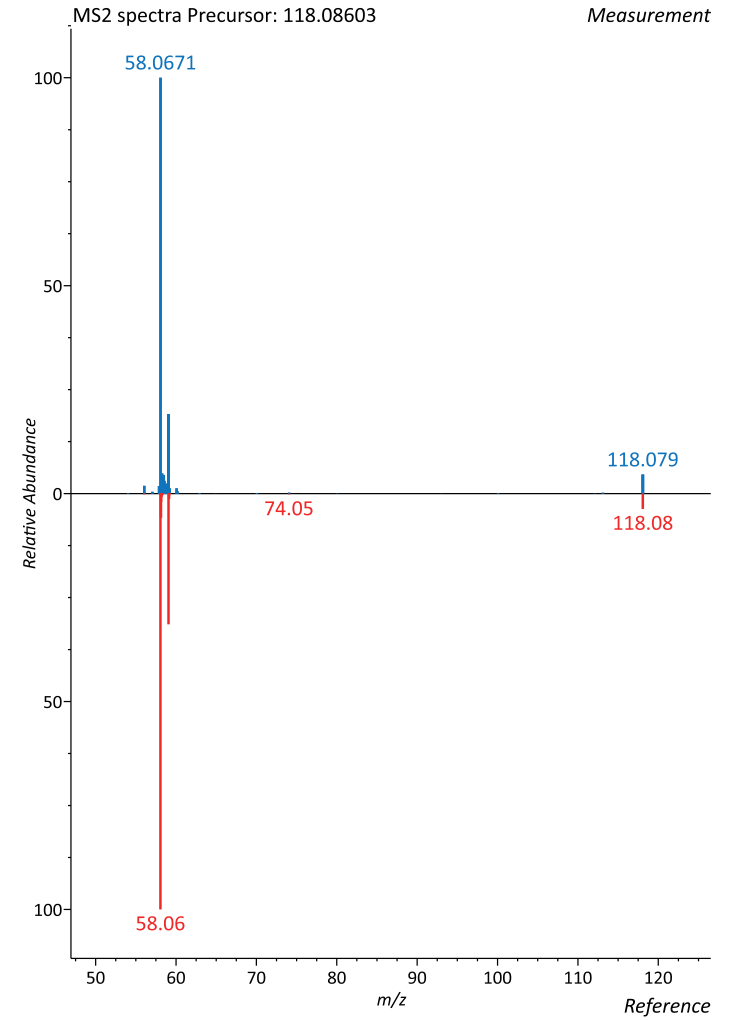



# Caffeine

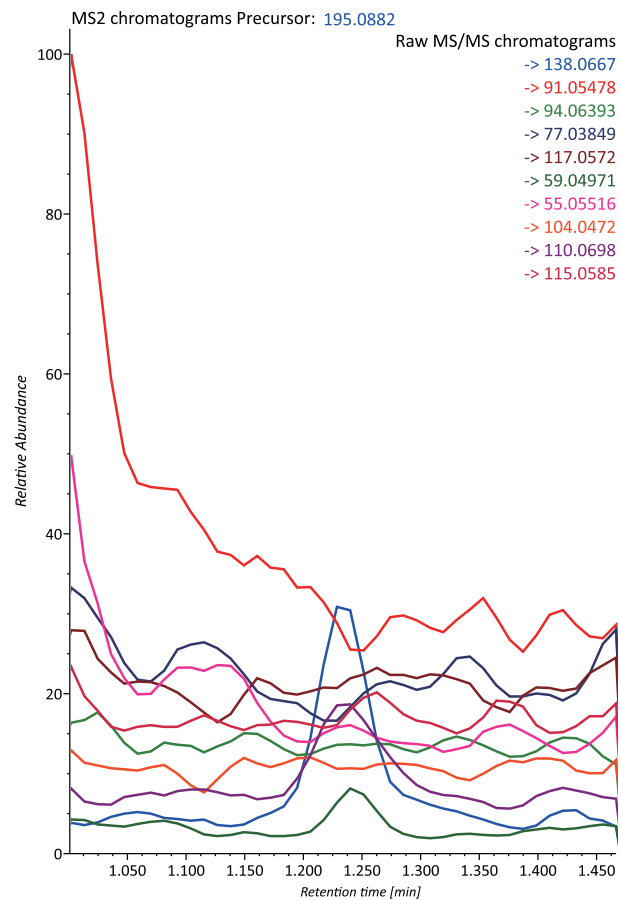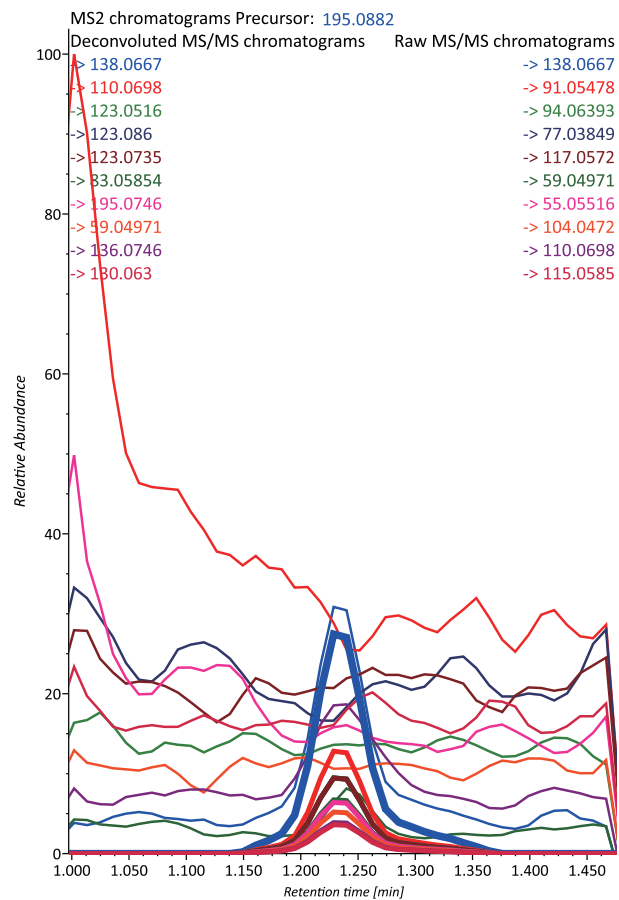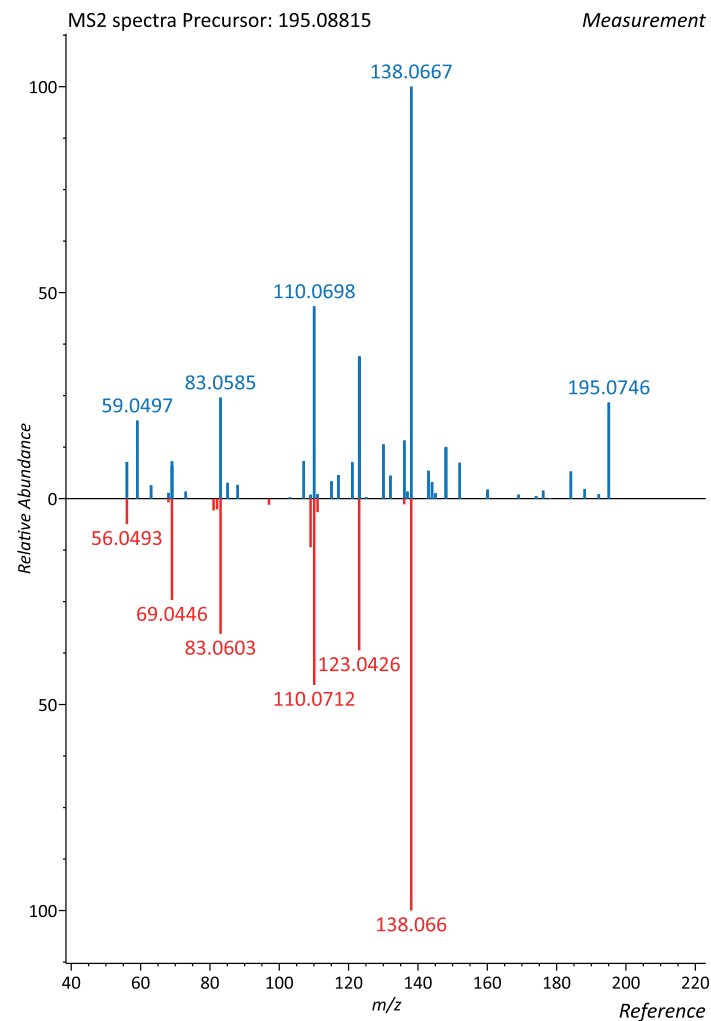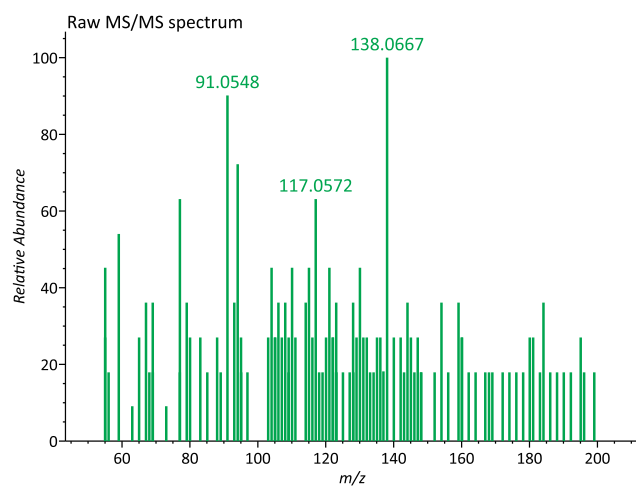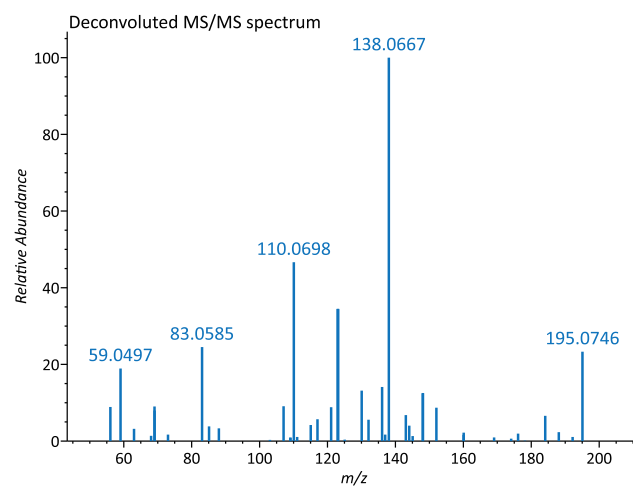

# Carnitine

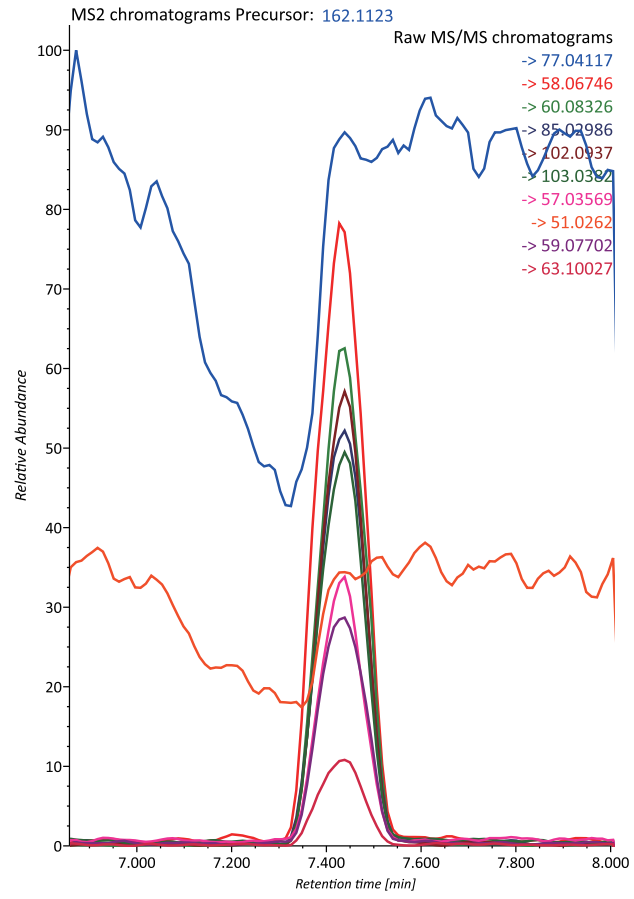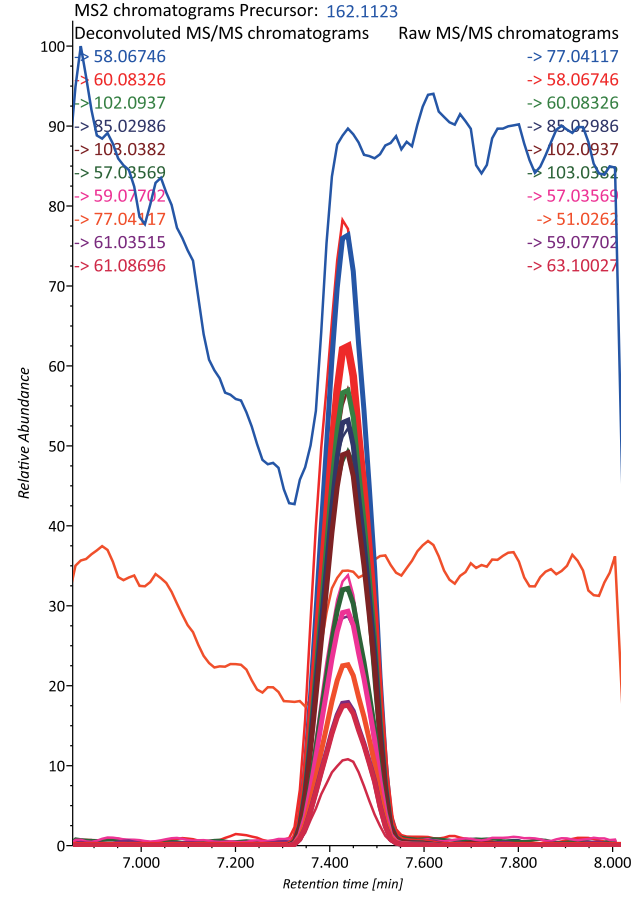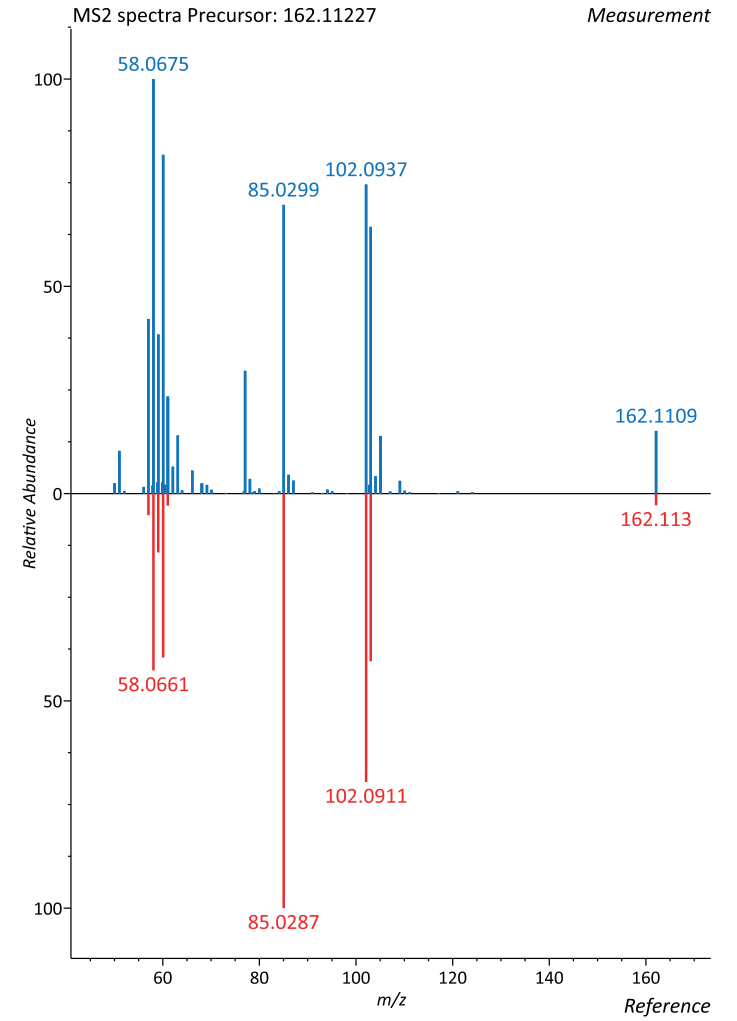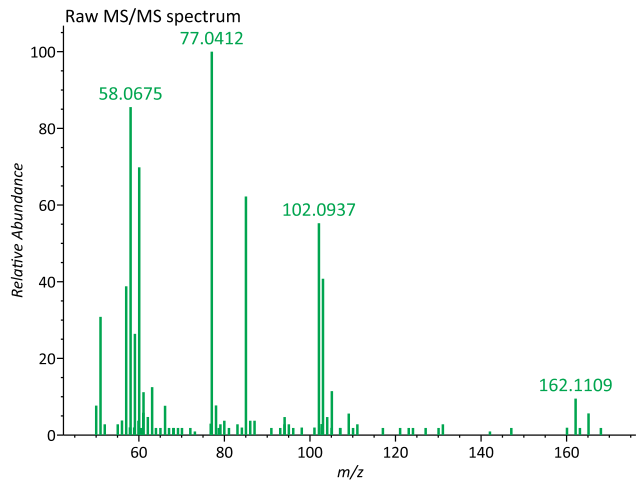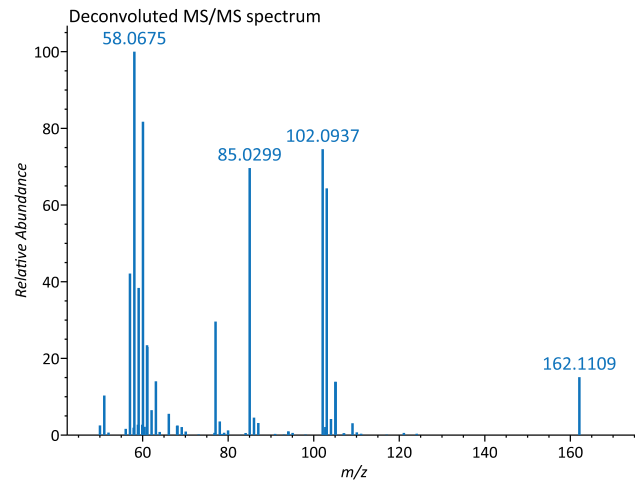

# 1-Hexadecylpyridinium

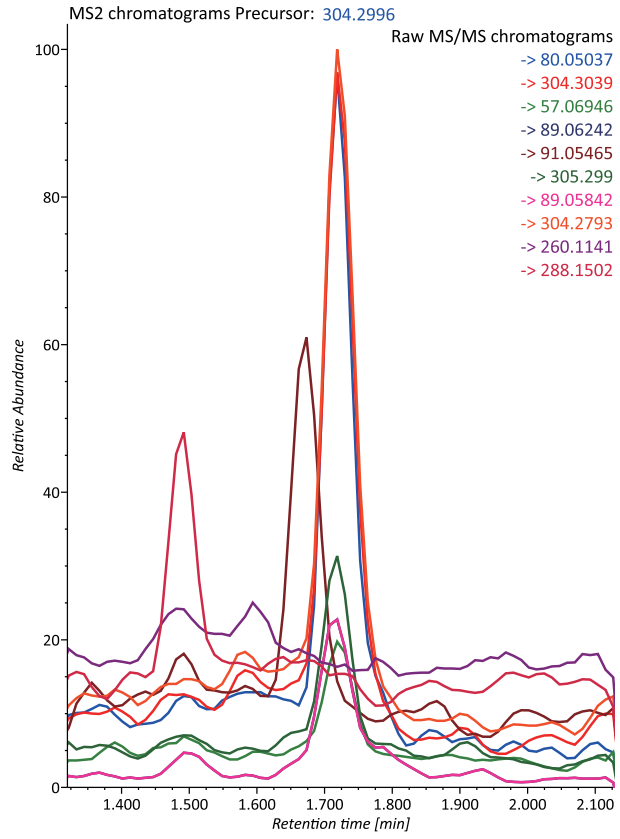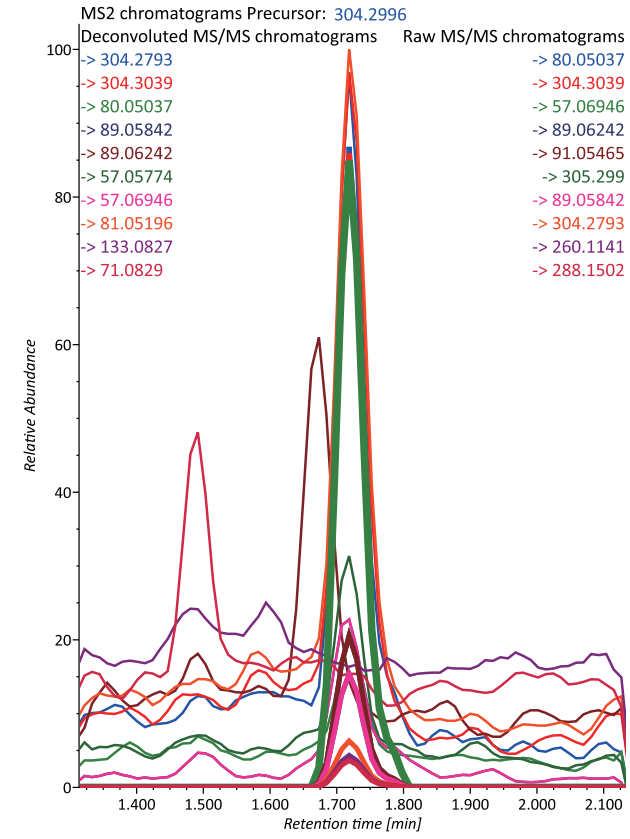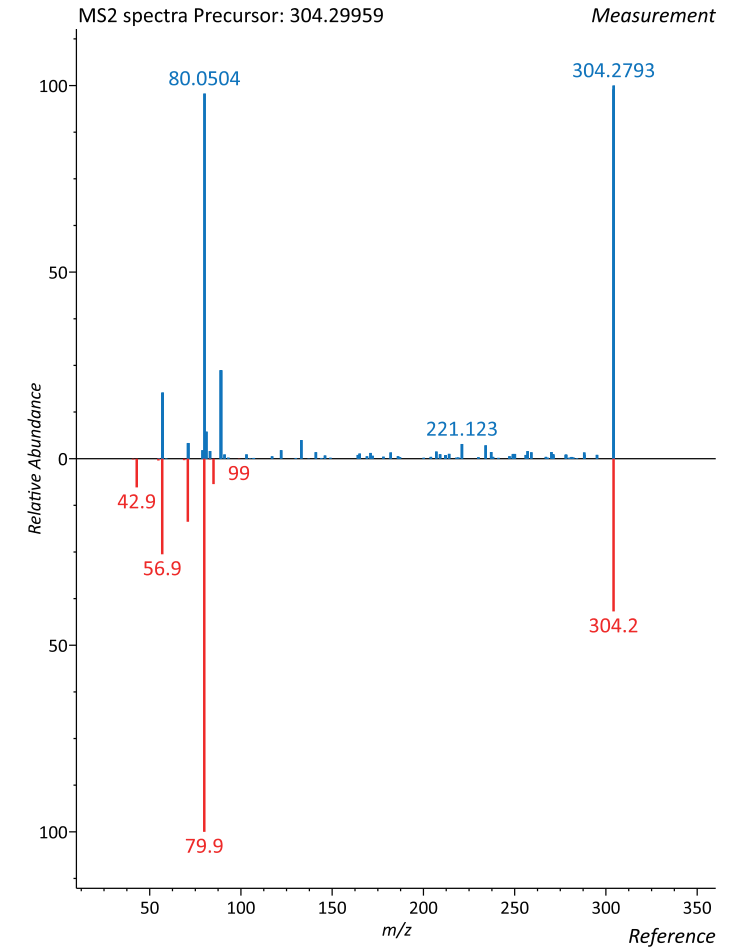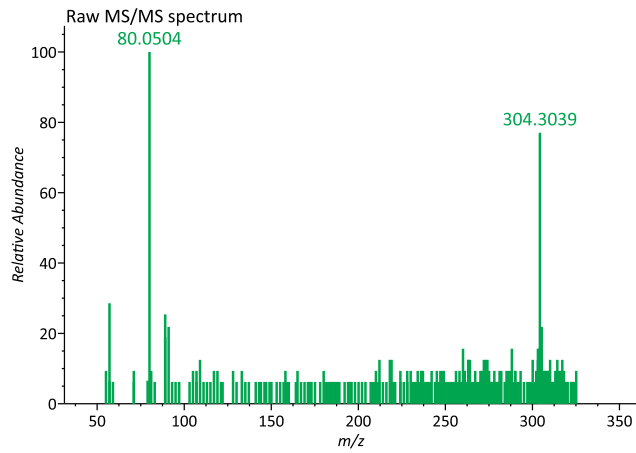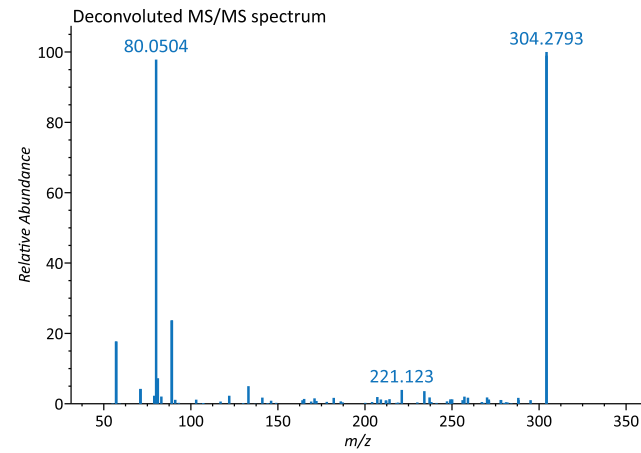

# 13-Docosenamide

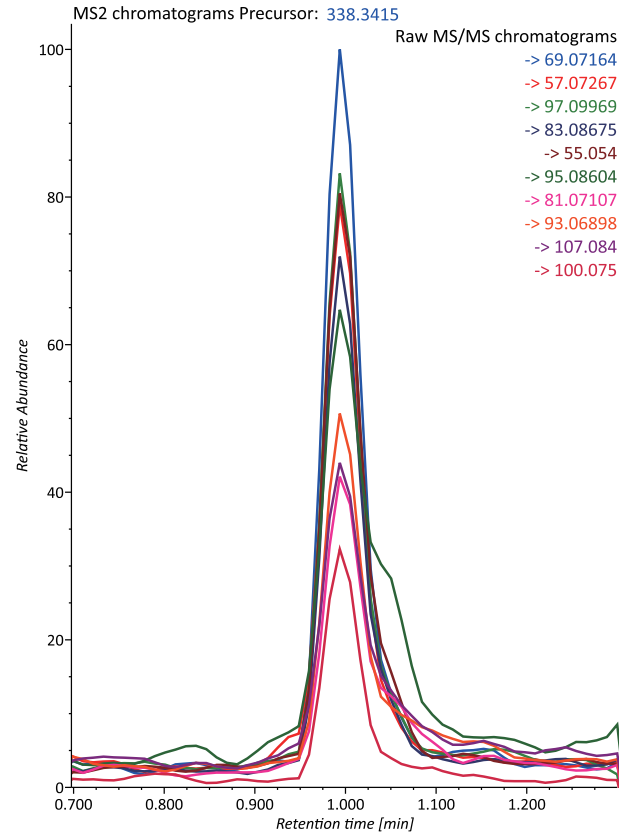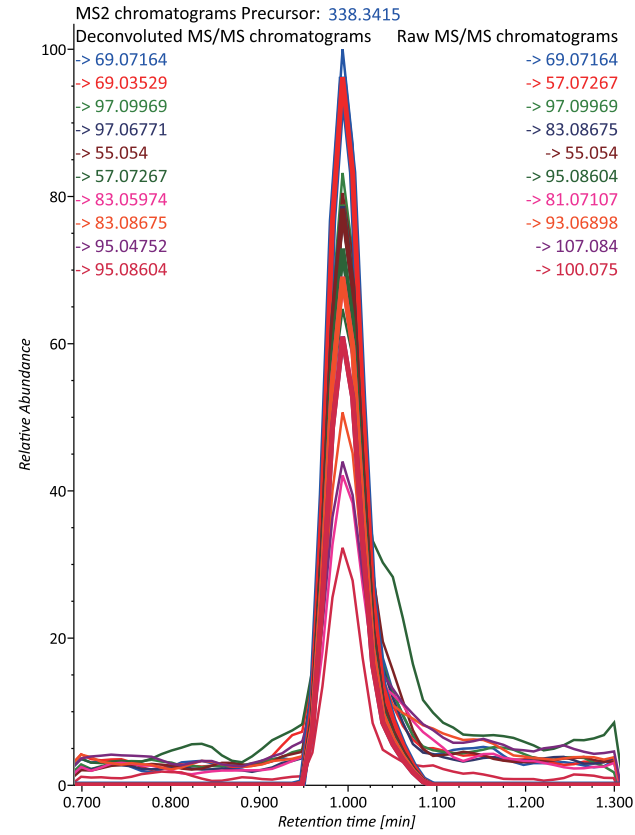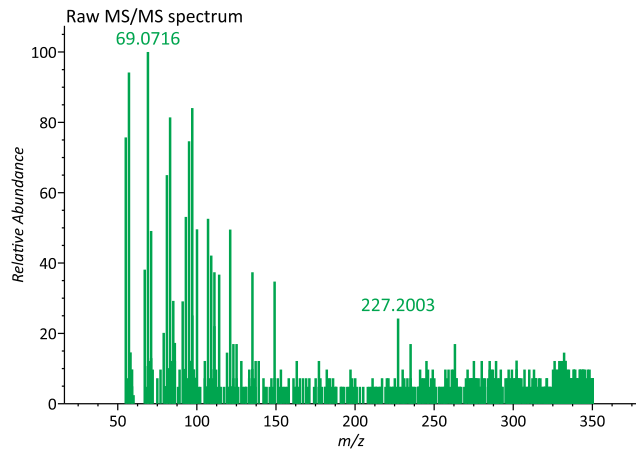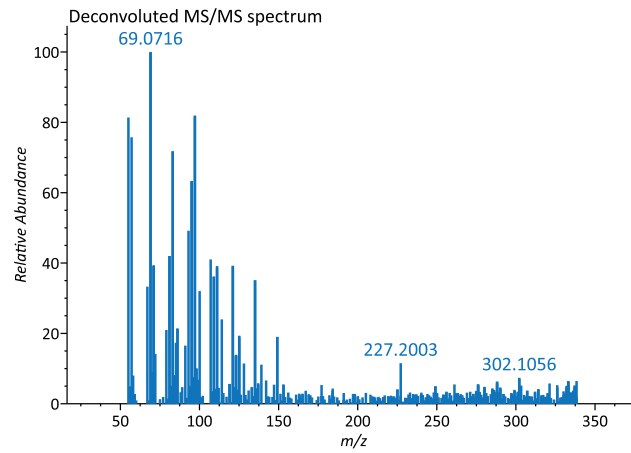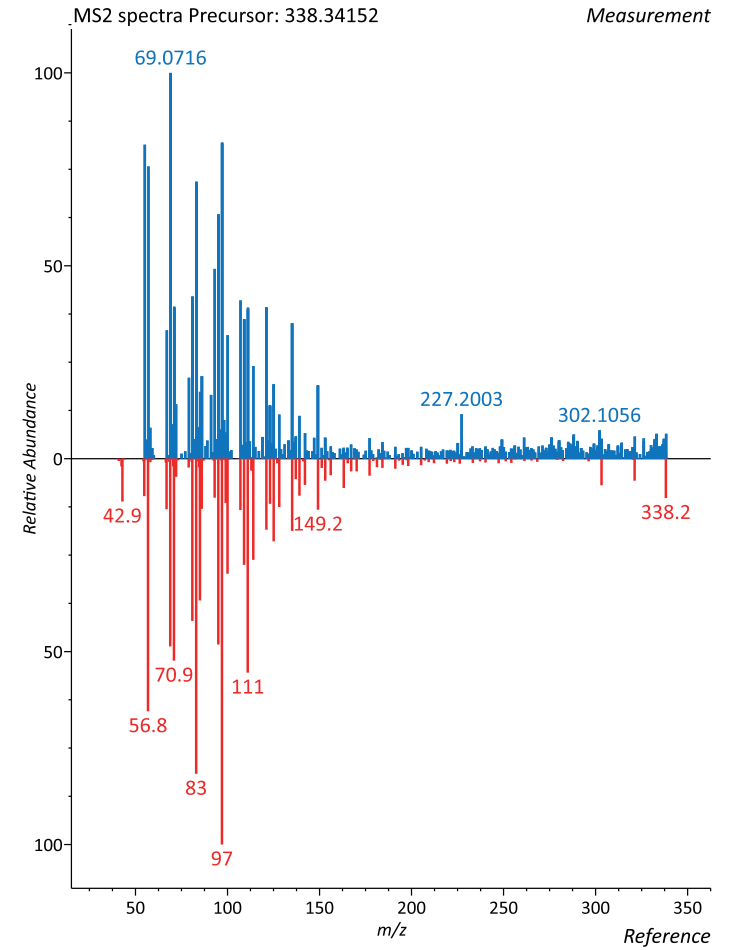

# Benzyl tetradecyl dimethylammonium

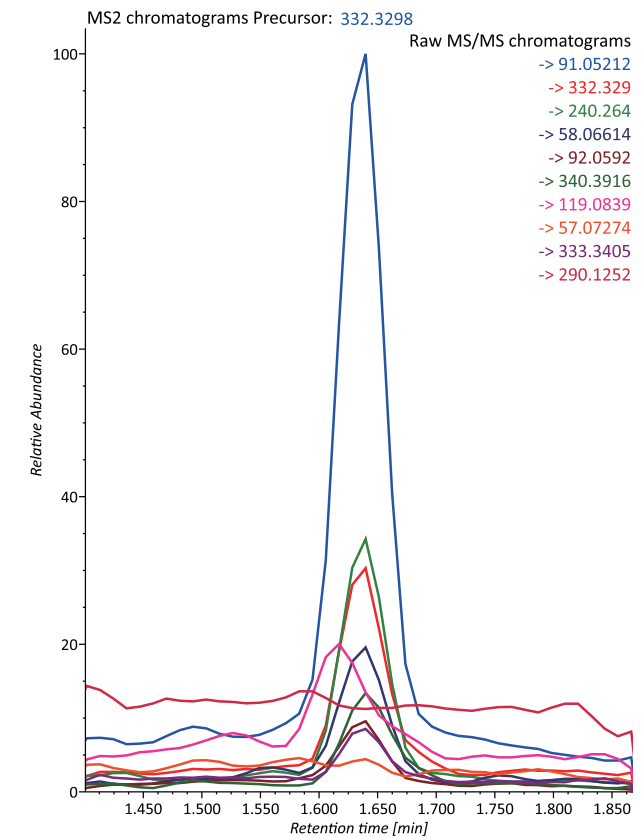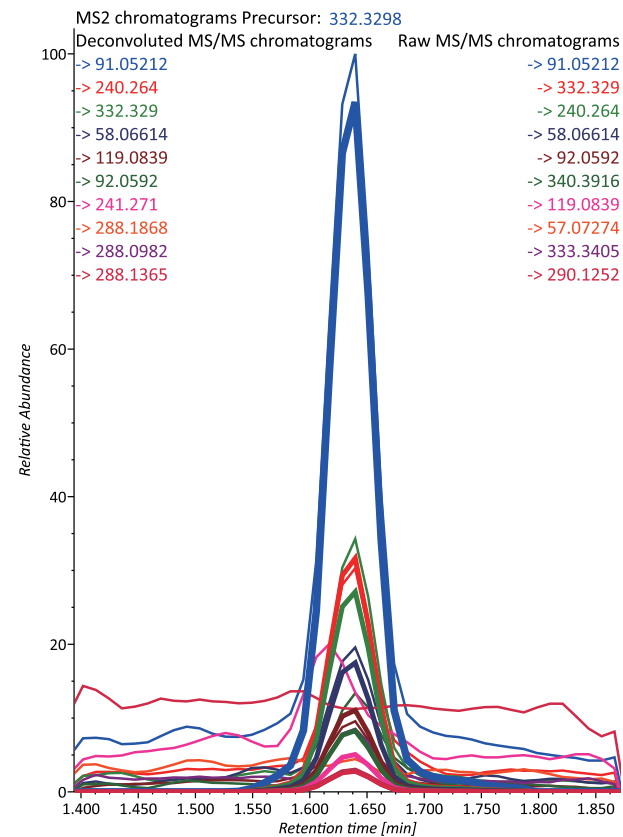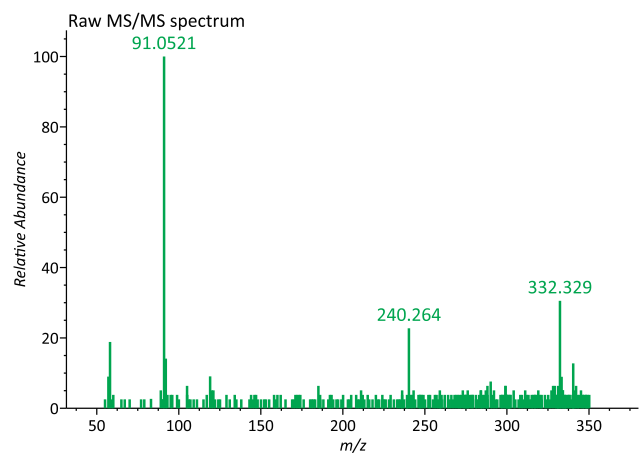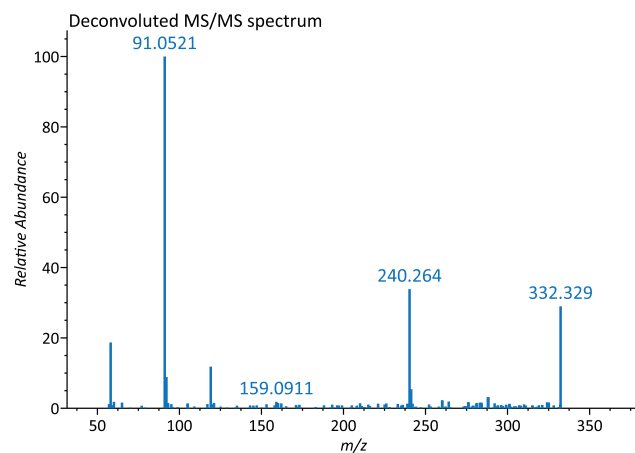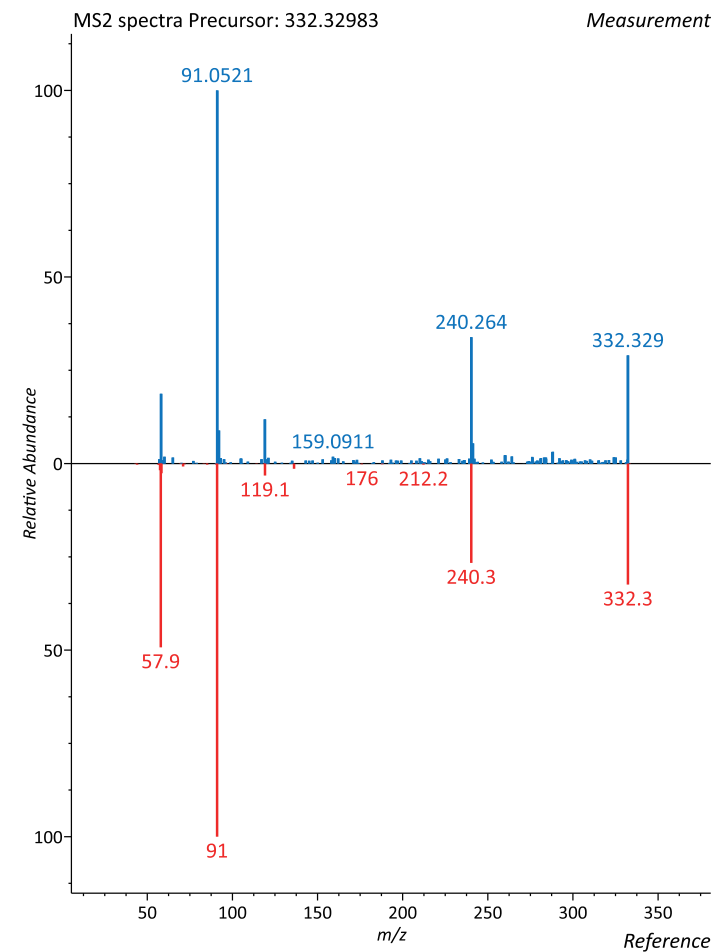

# Ecgonine methyl ester

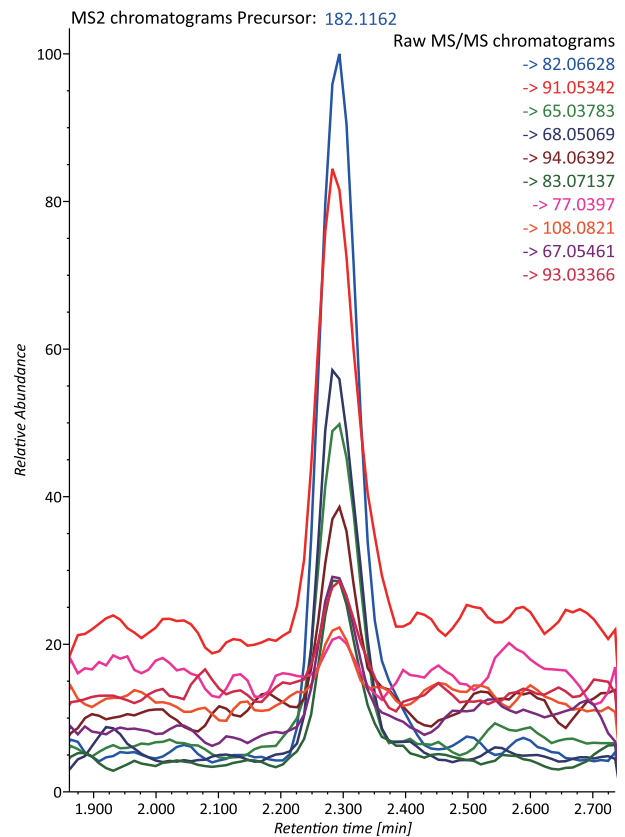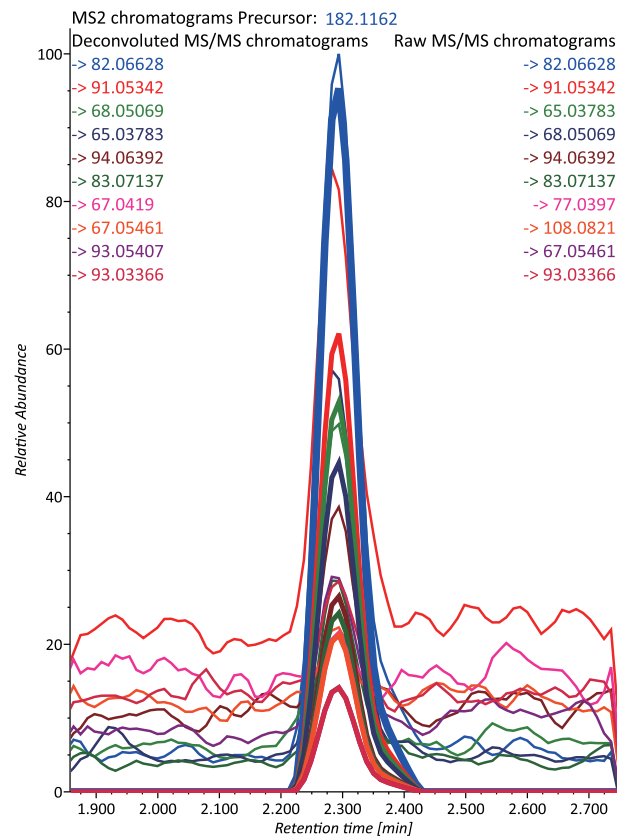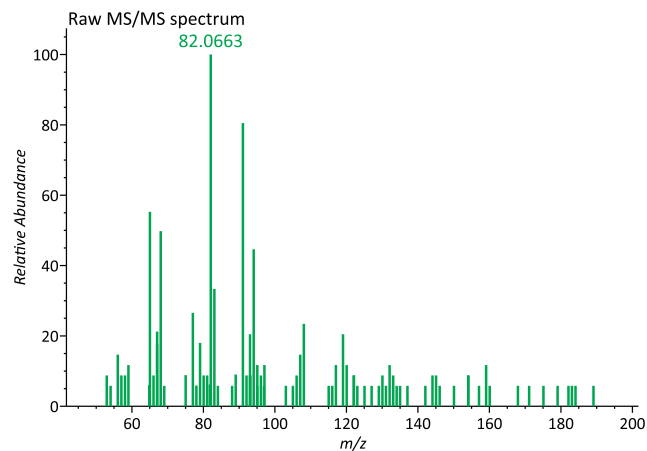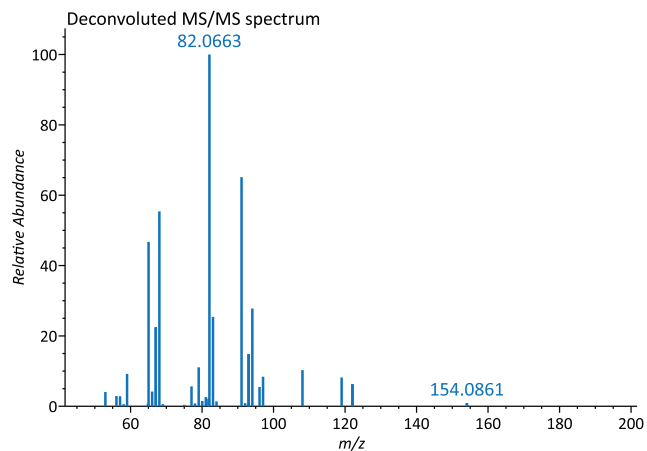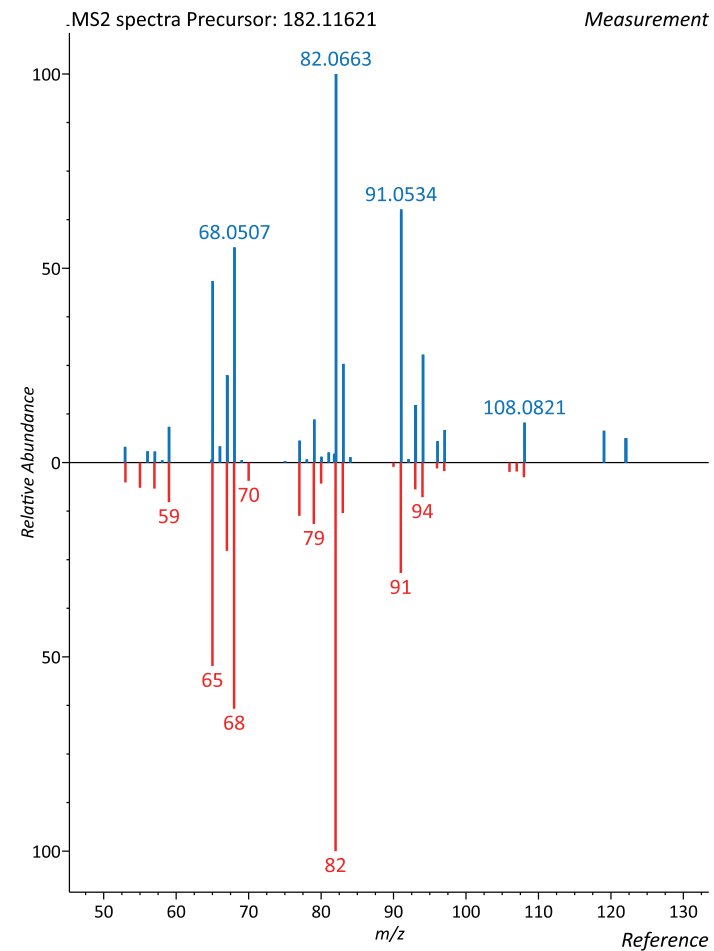

# Midazolam

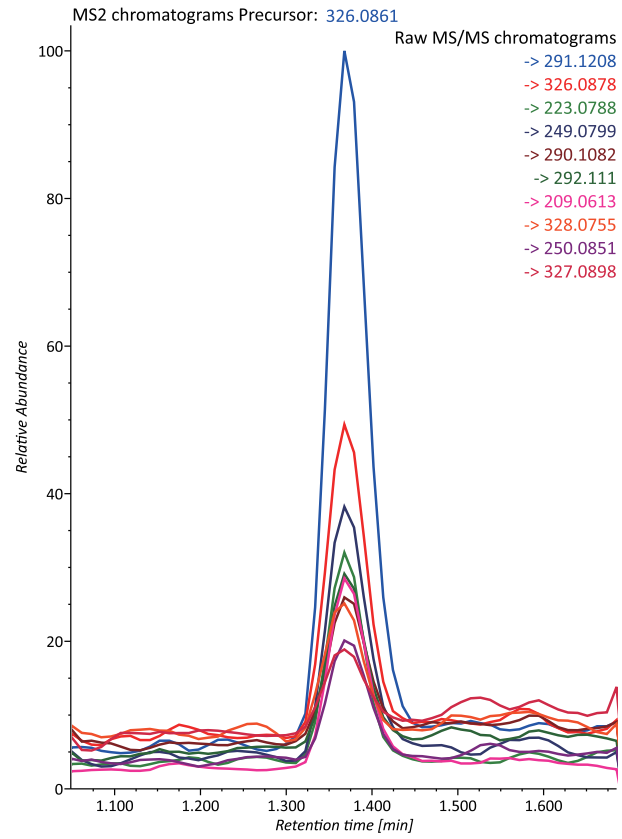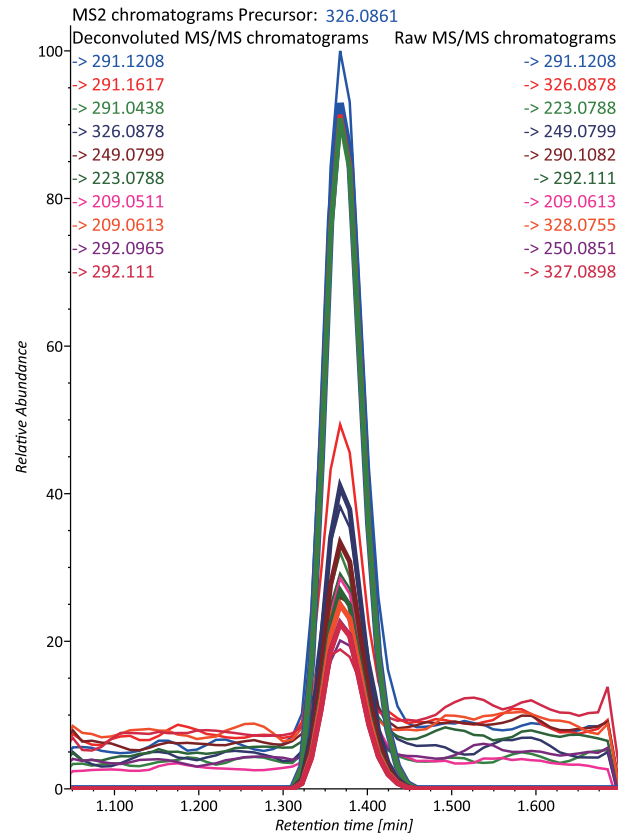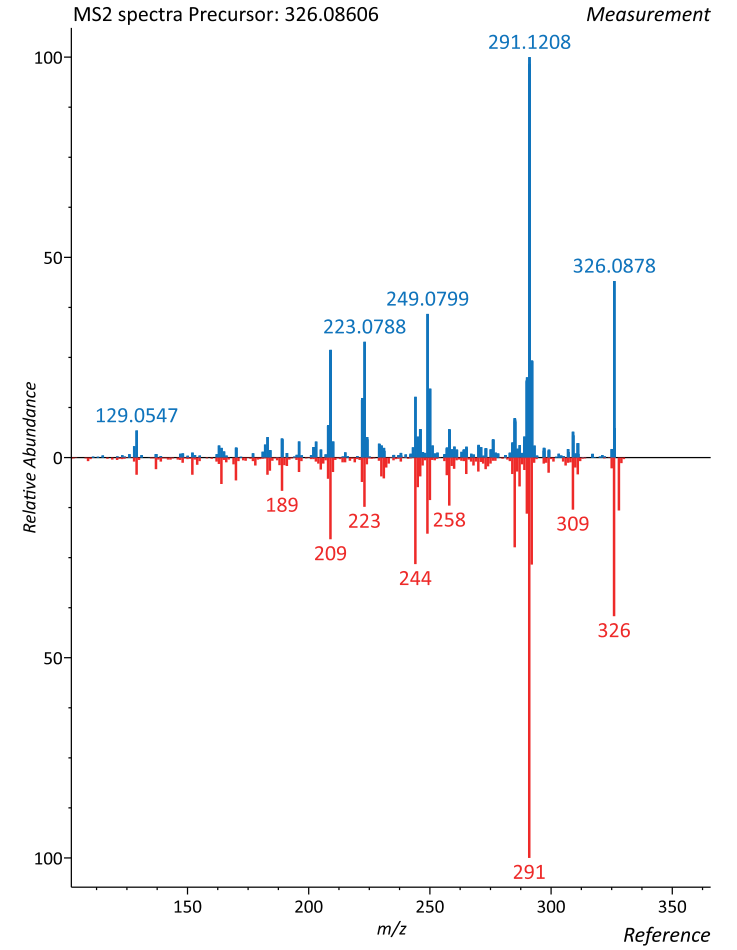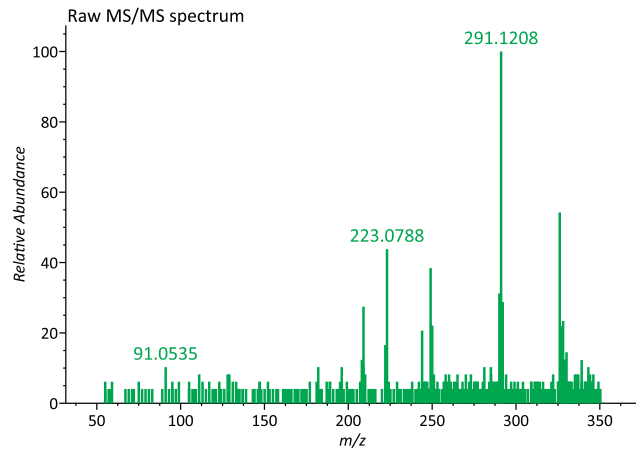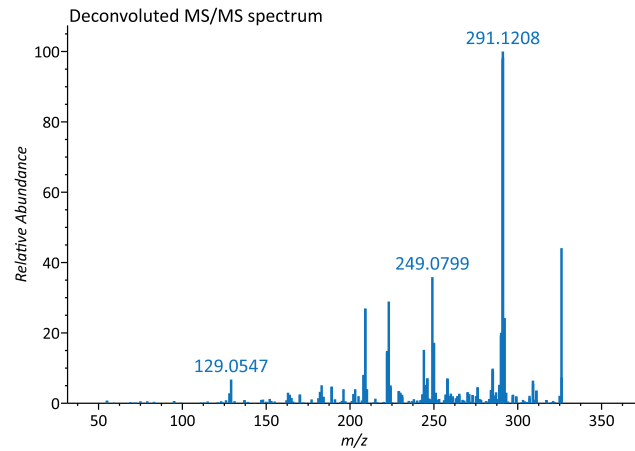

# Tyrosine

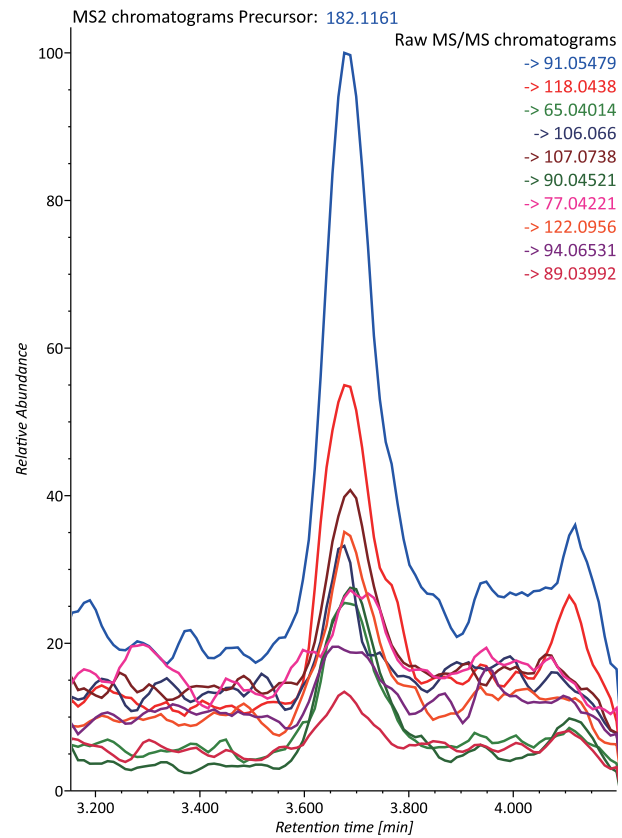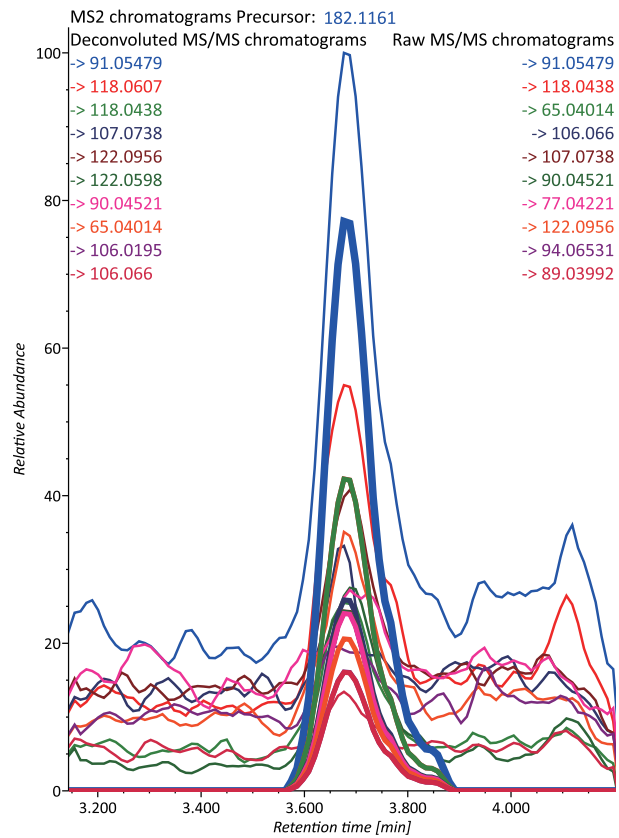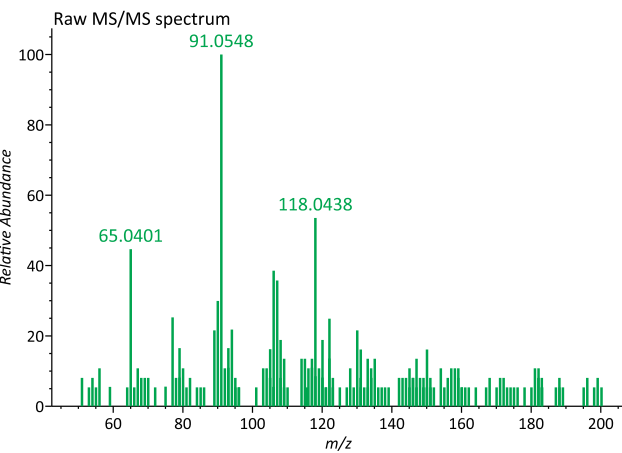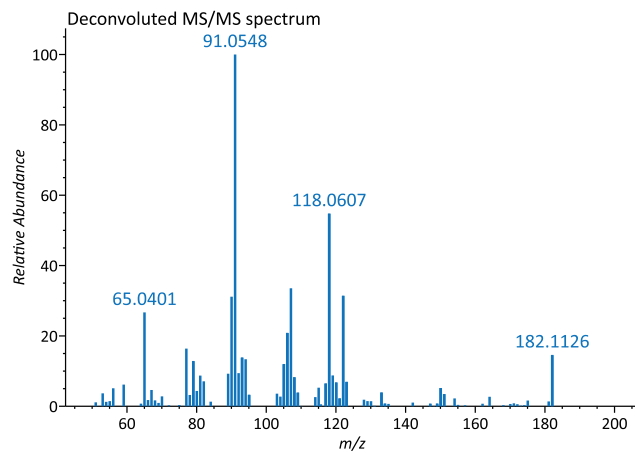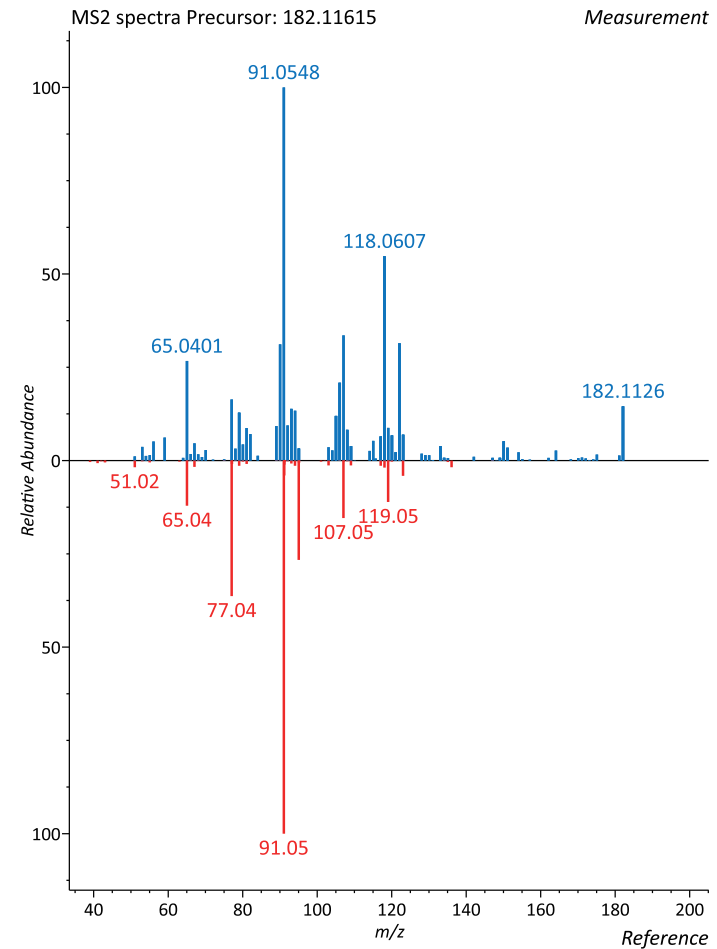



# Creatinine

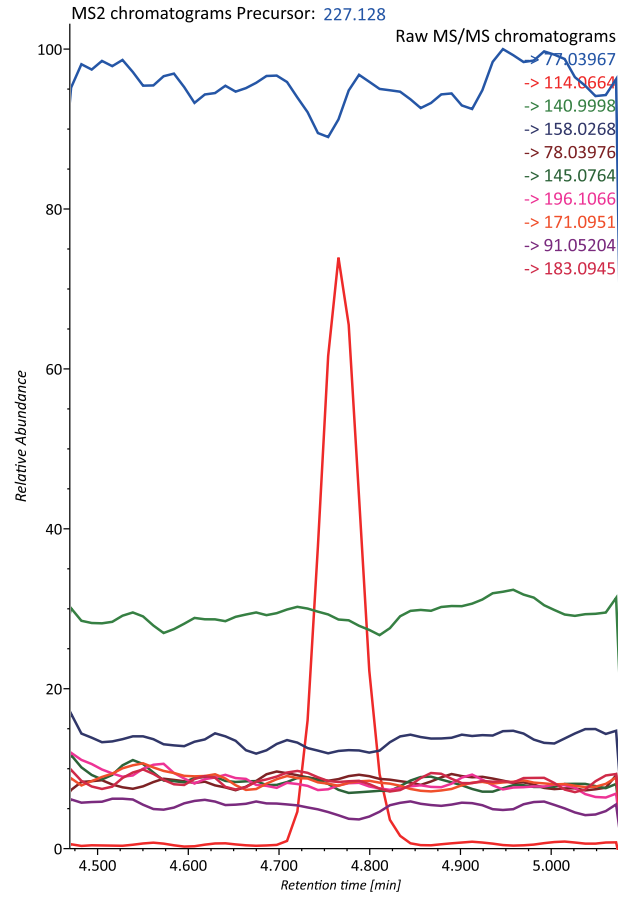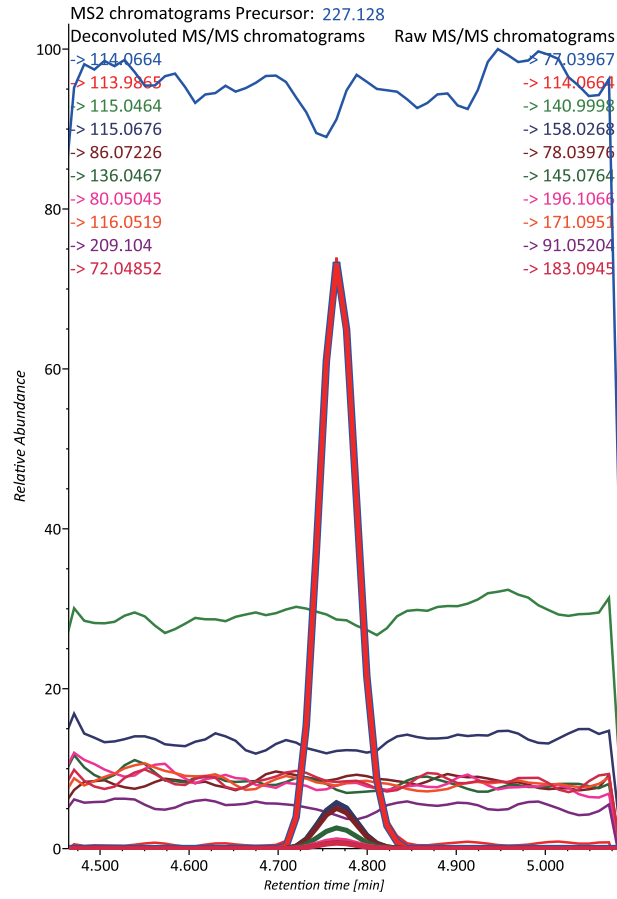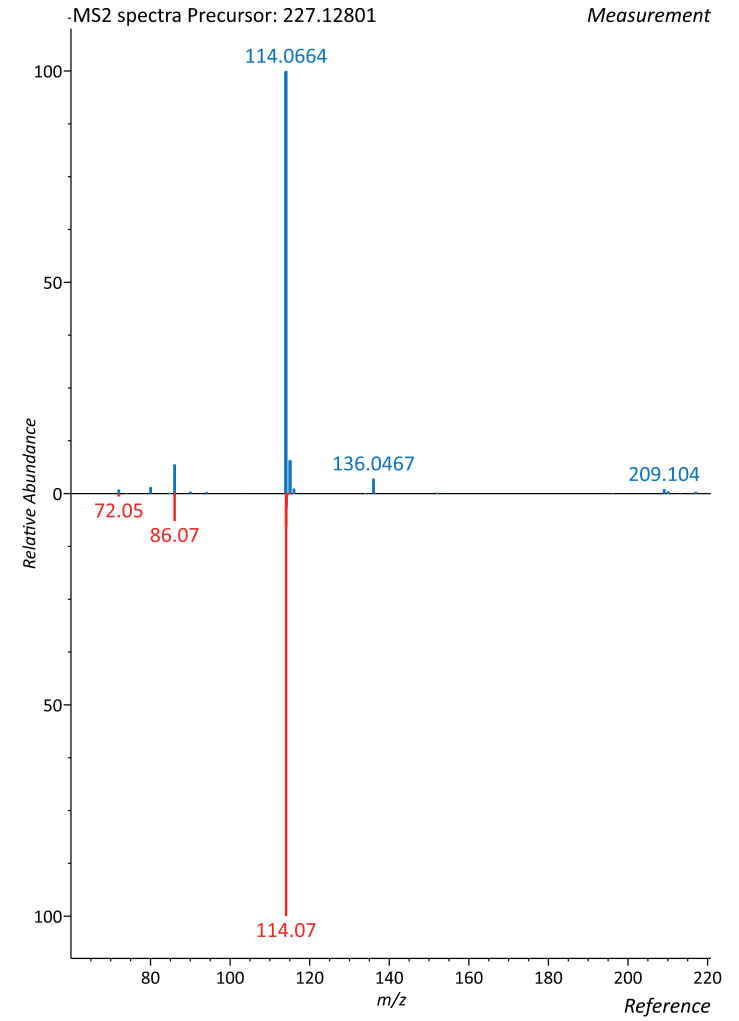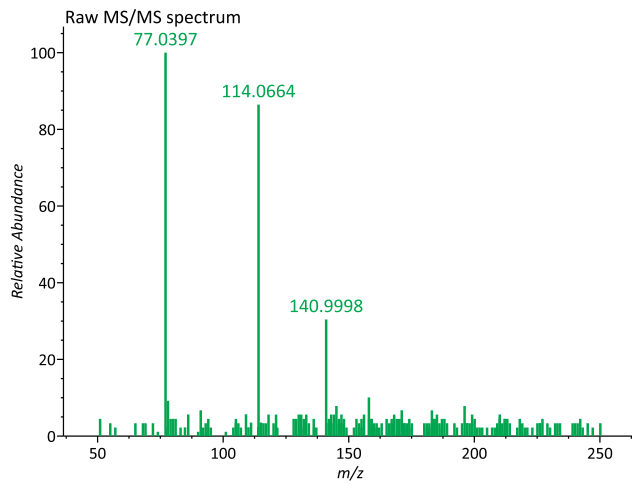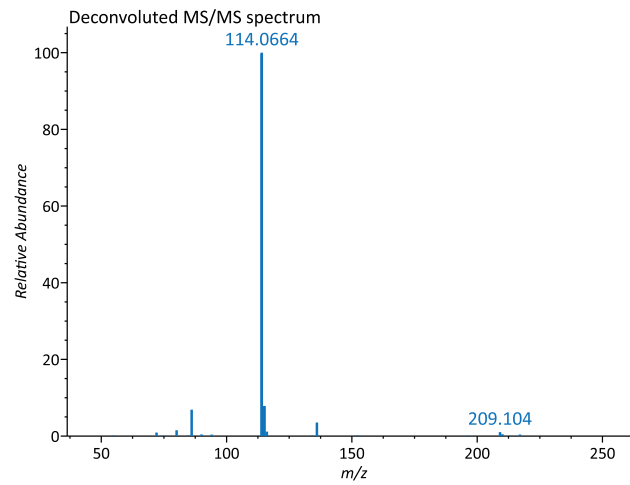

# Diocetyl phthalate

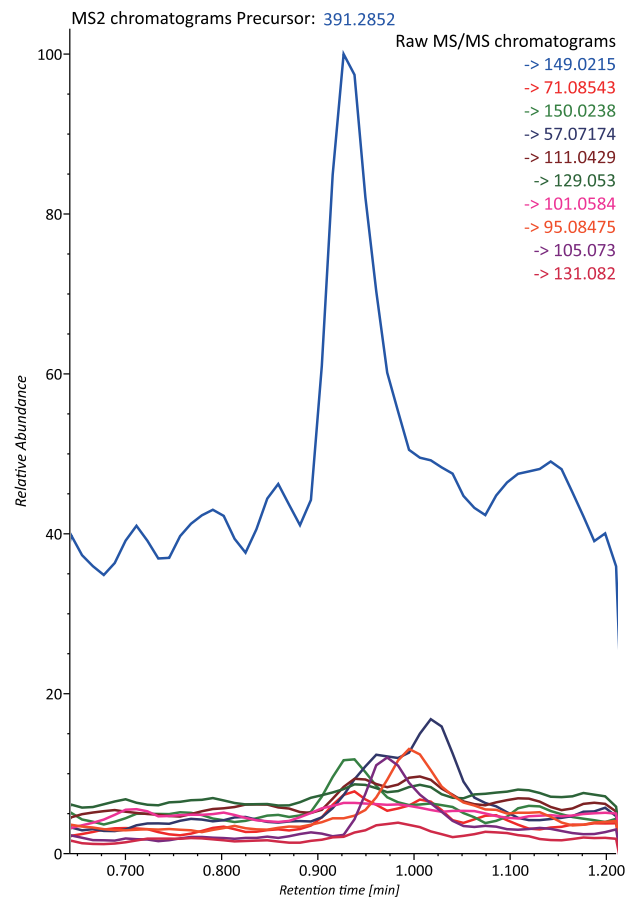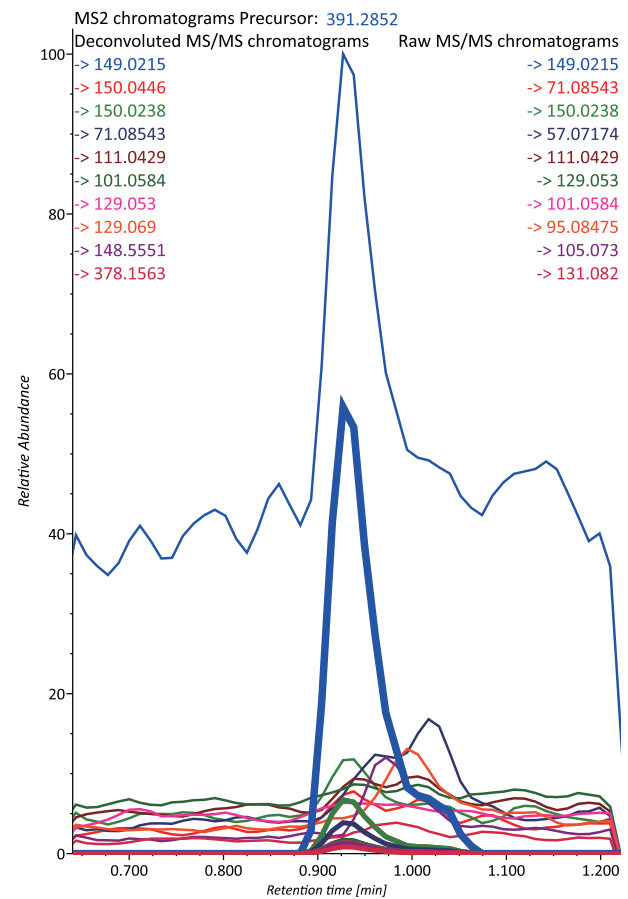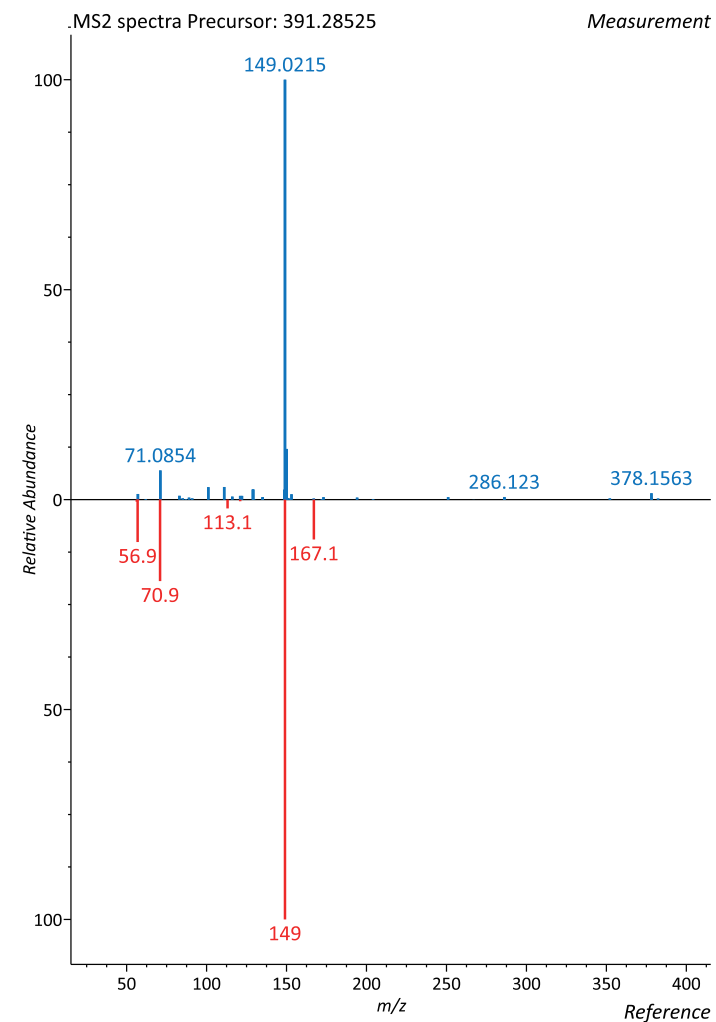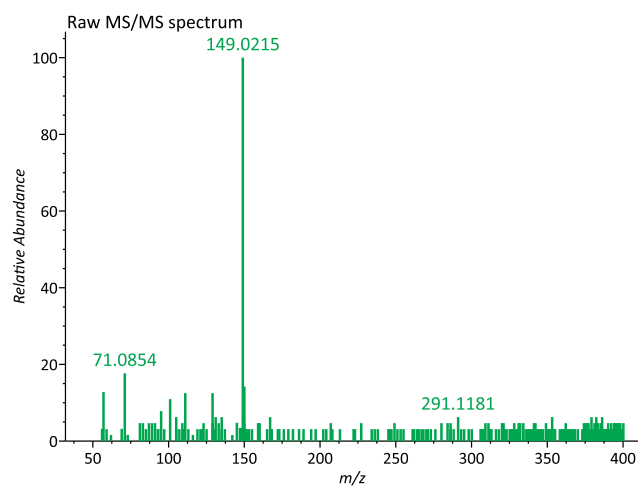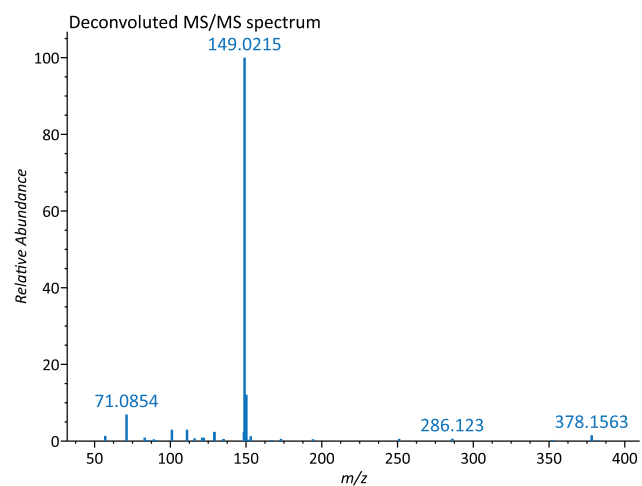

# Glutamine

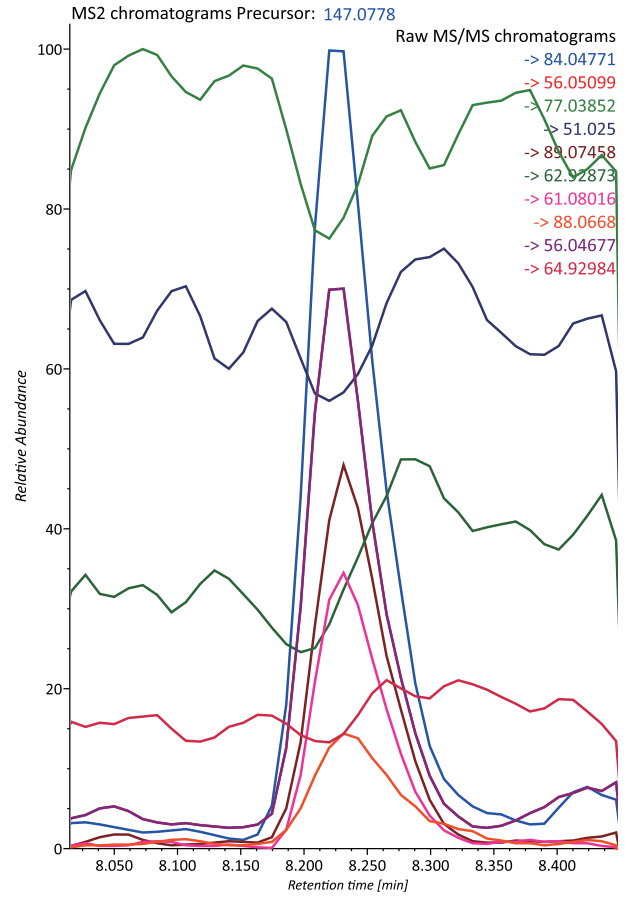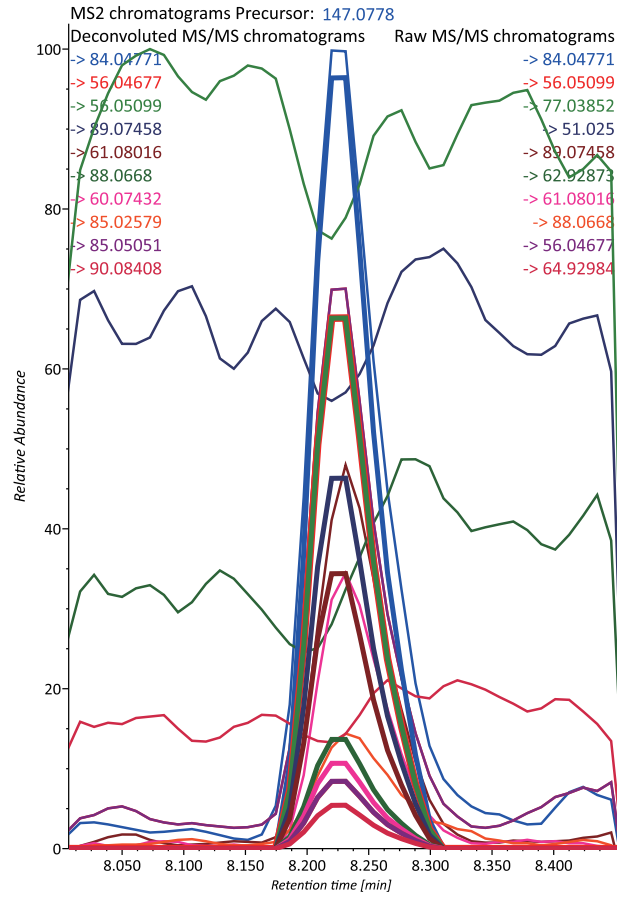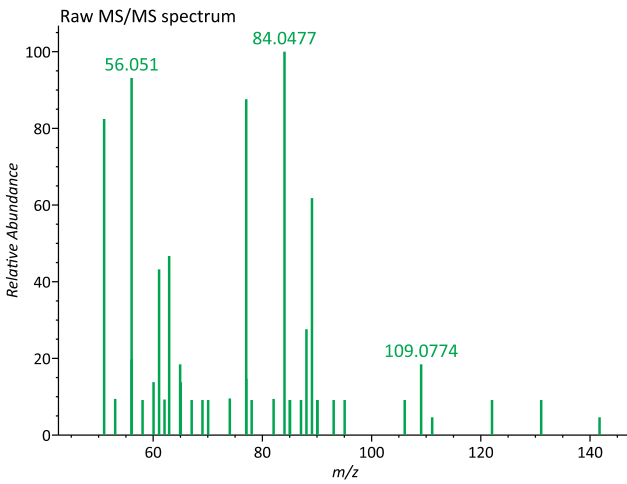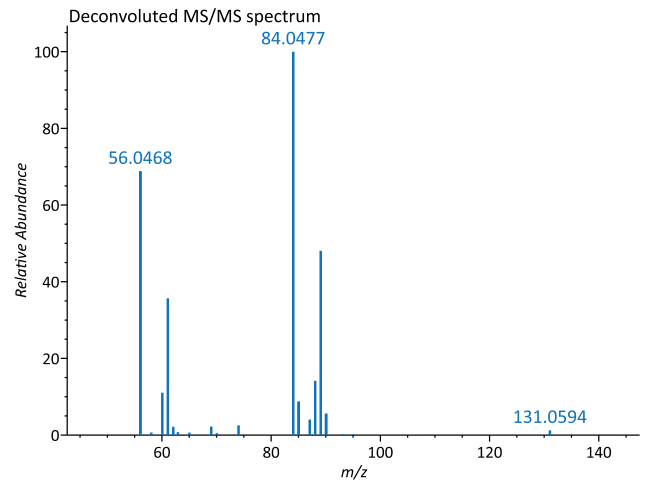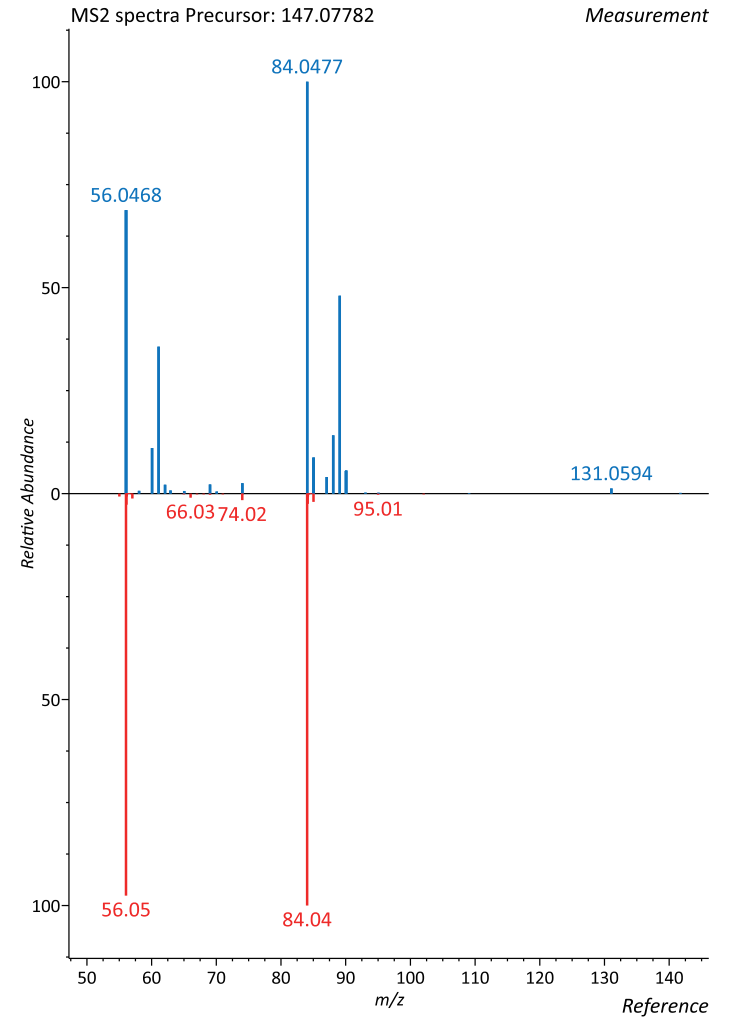

# Guanidine

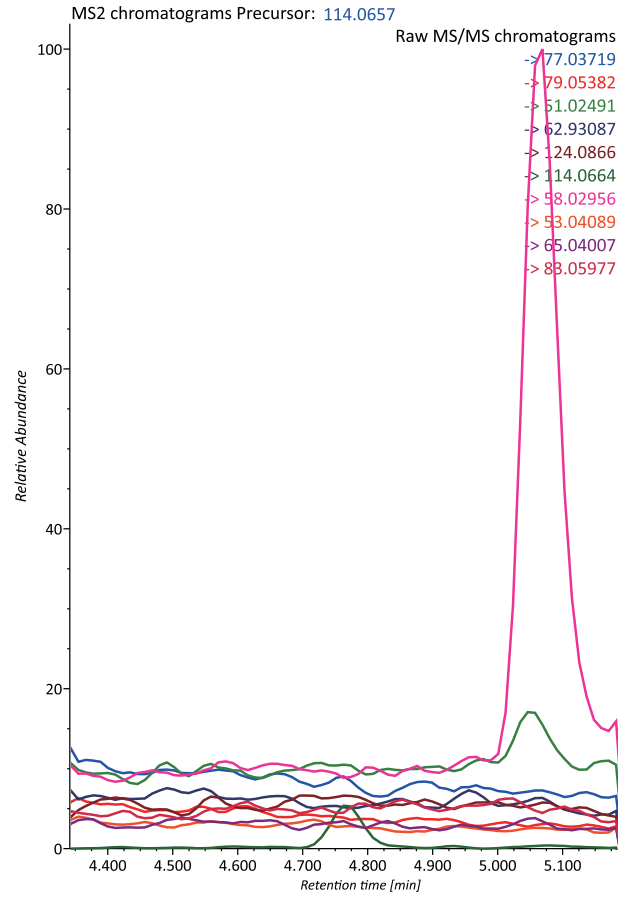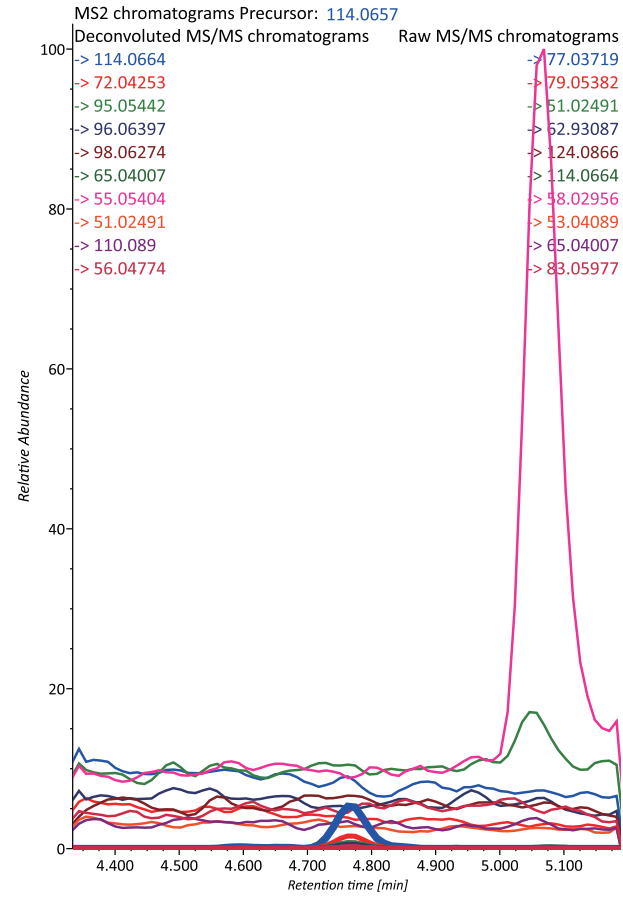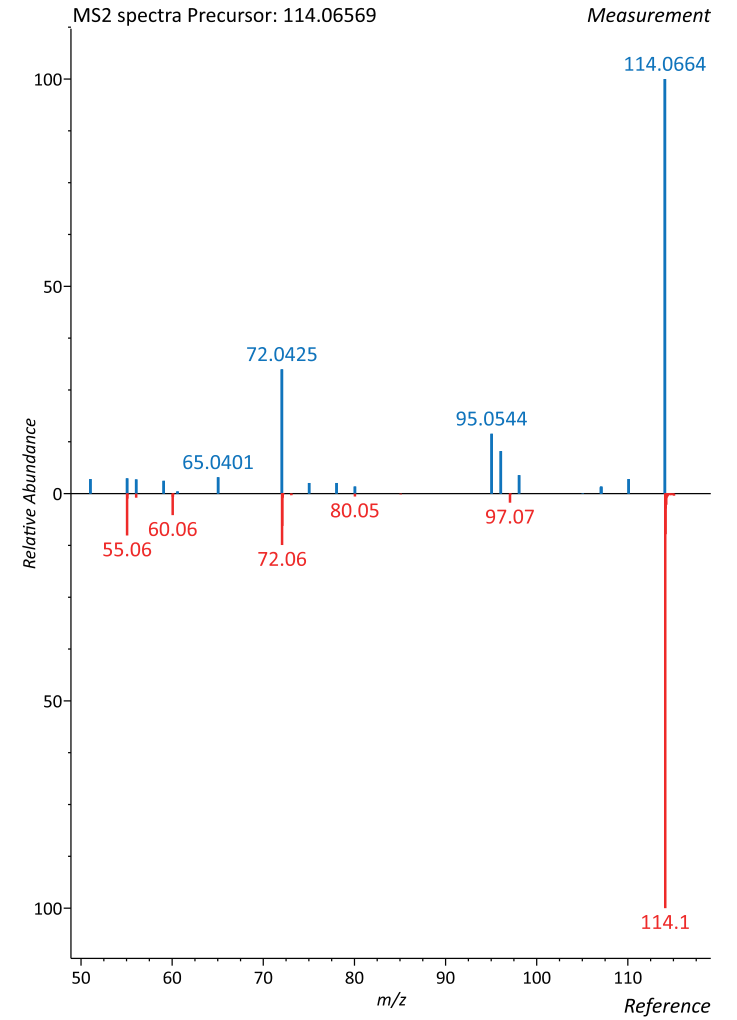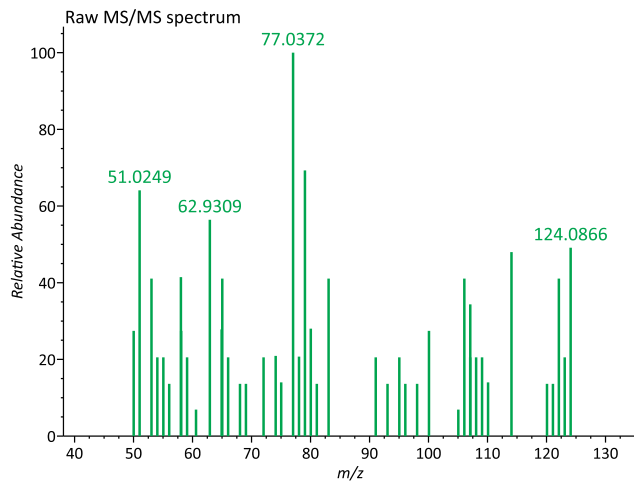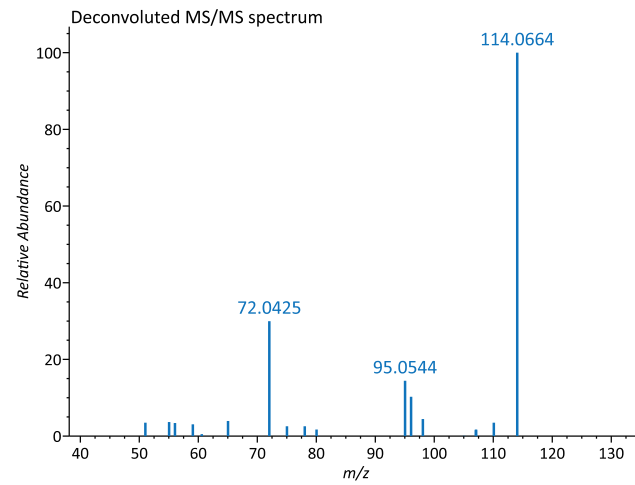

# Hypoxanthine

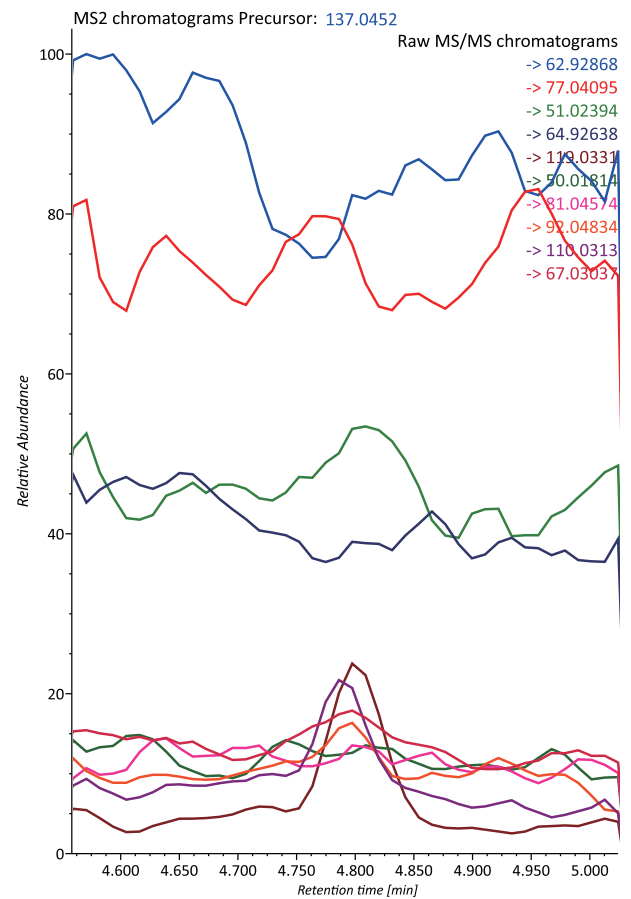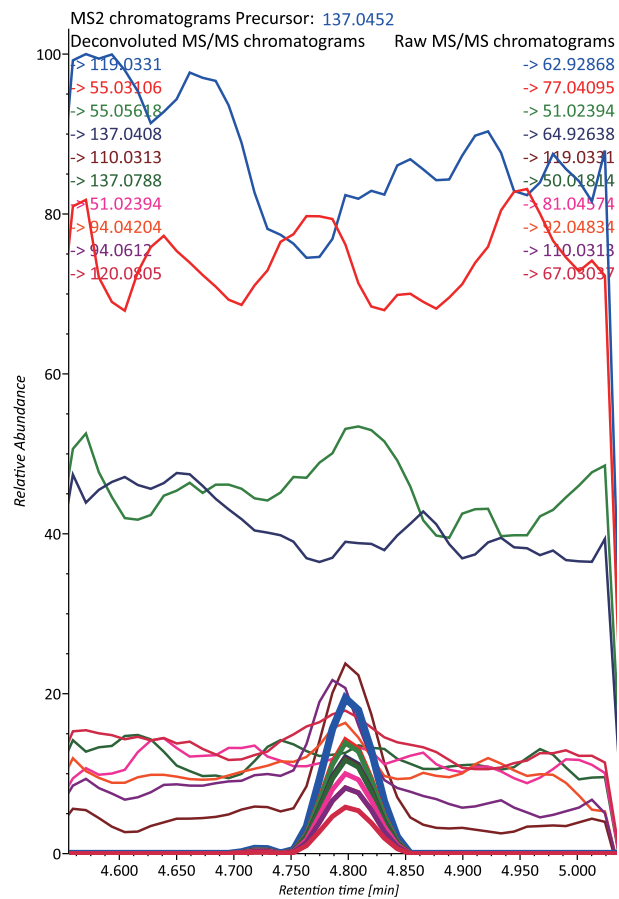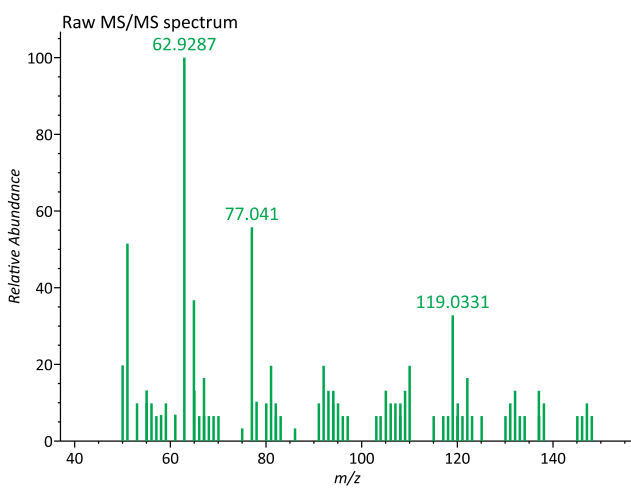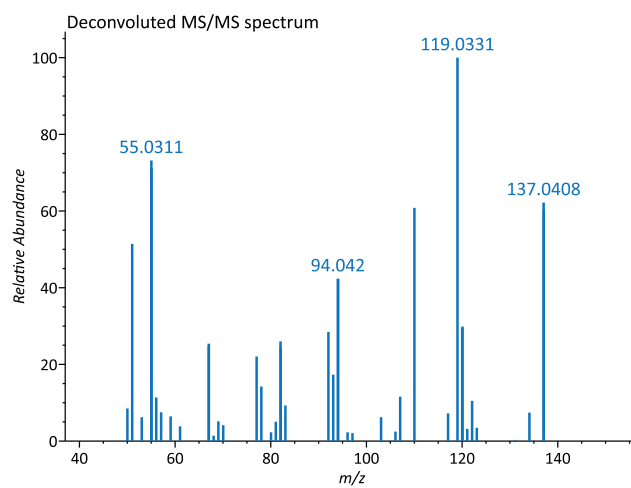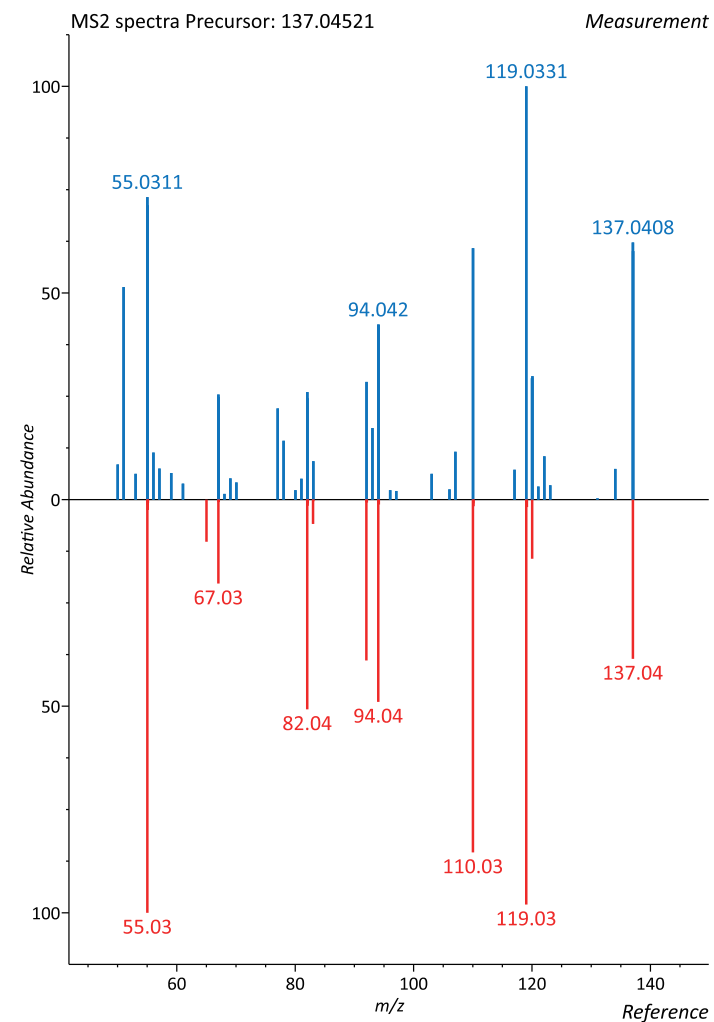

# Levamisole

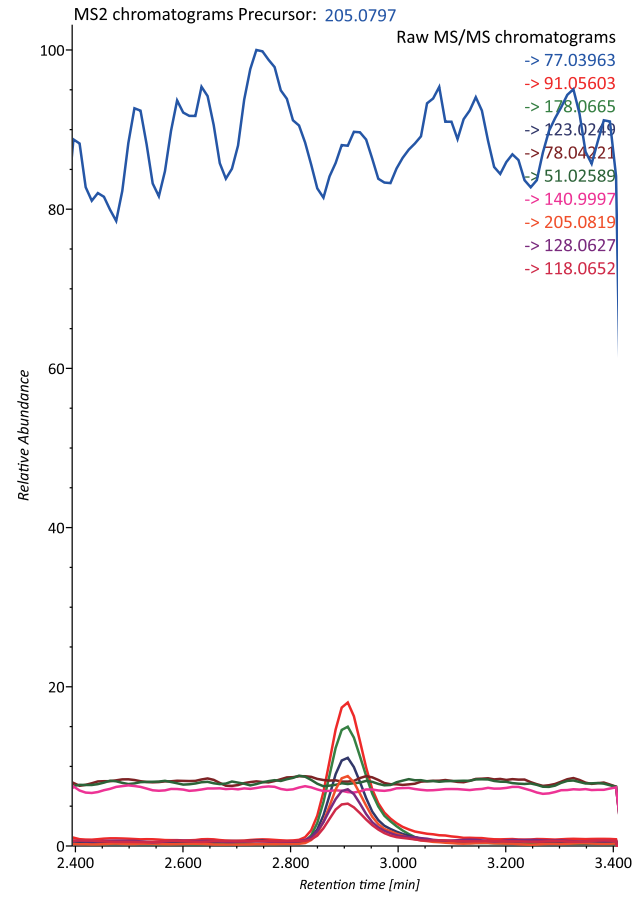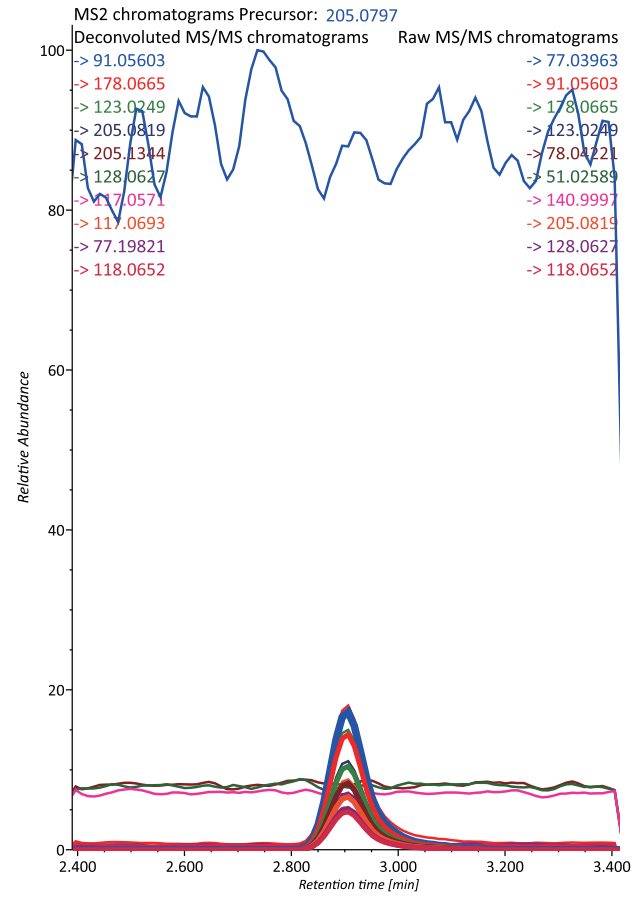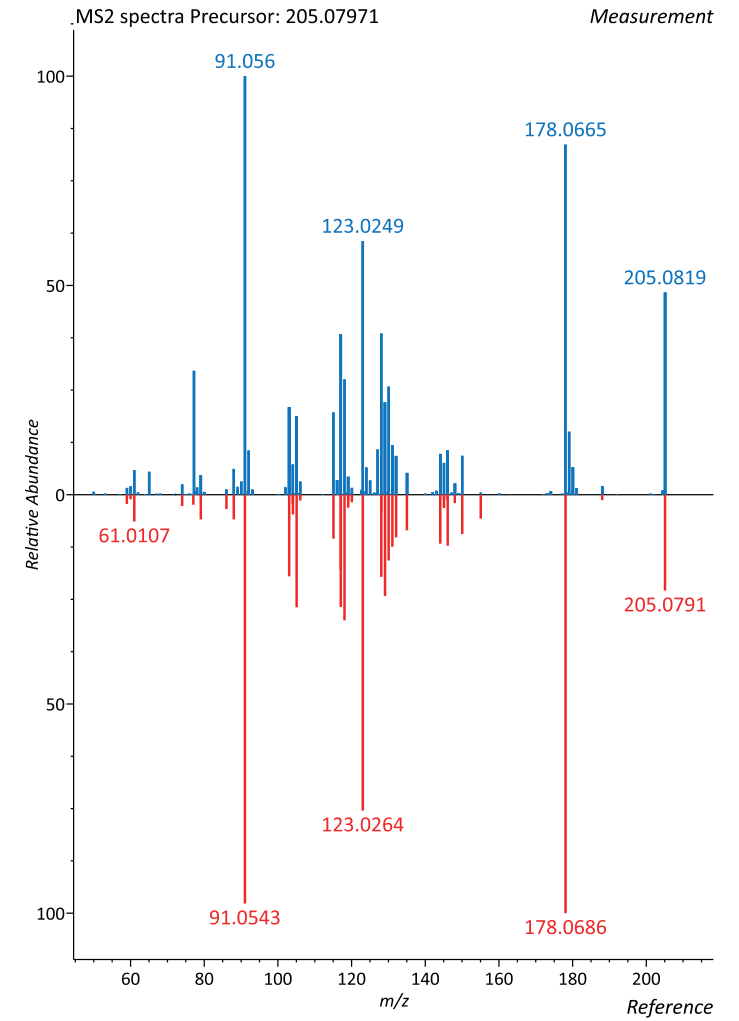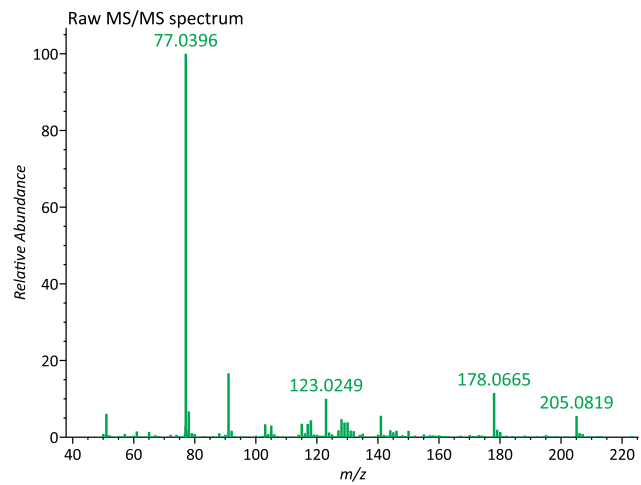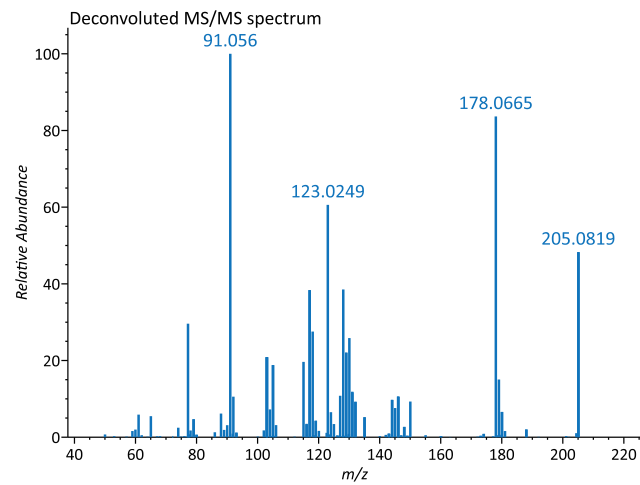

# Lysine

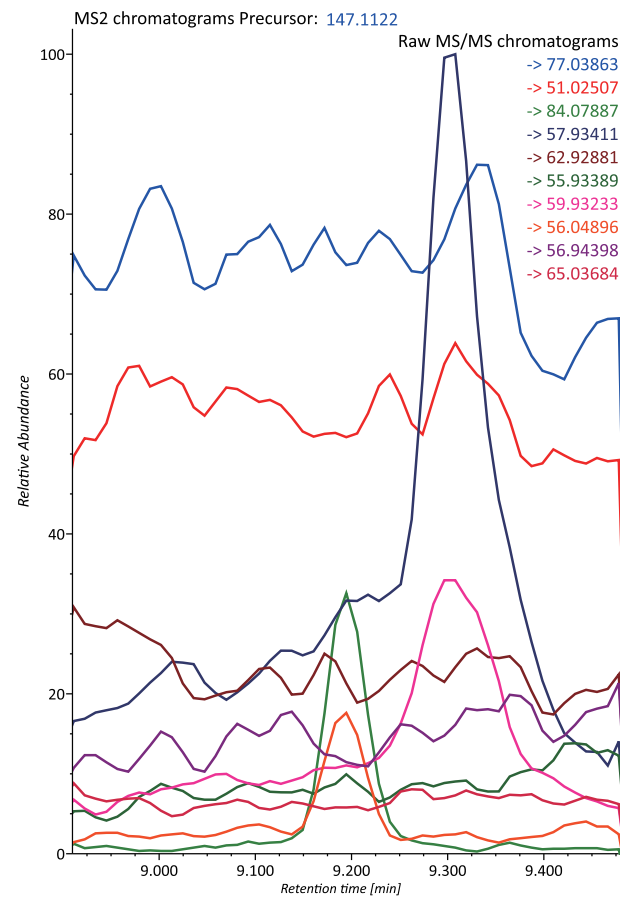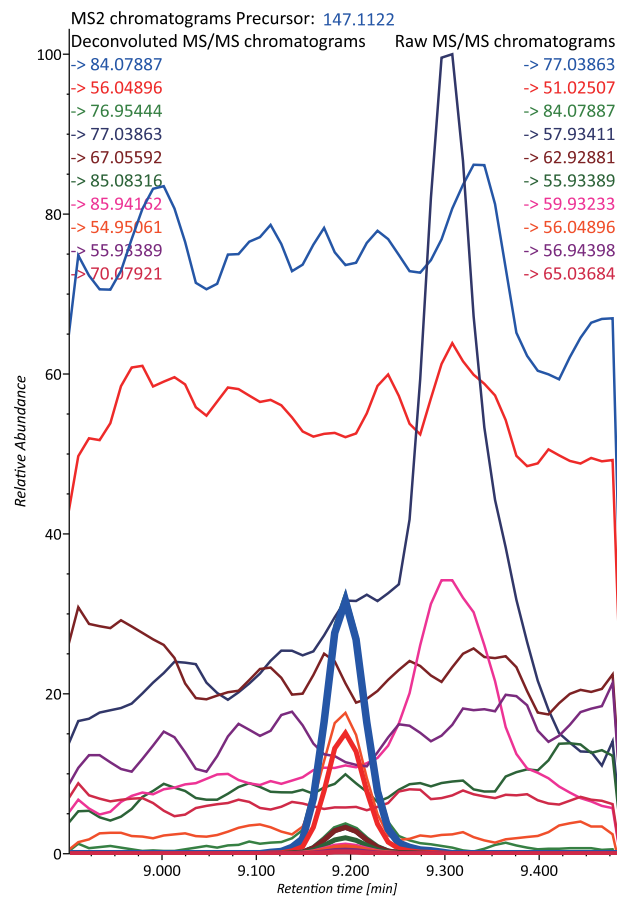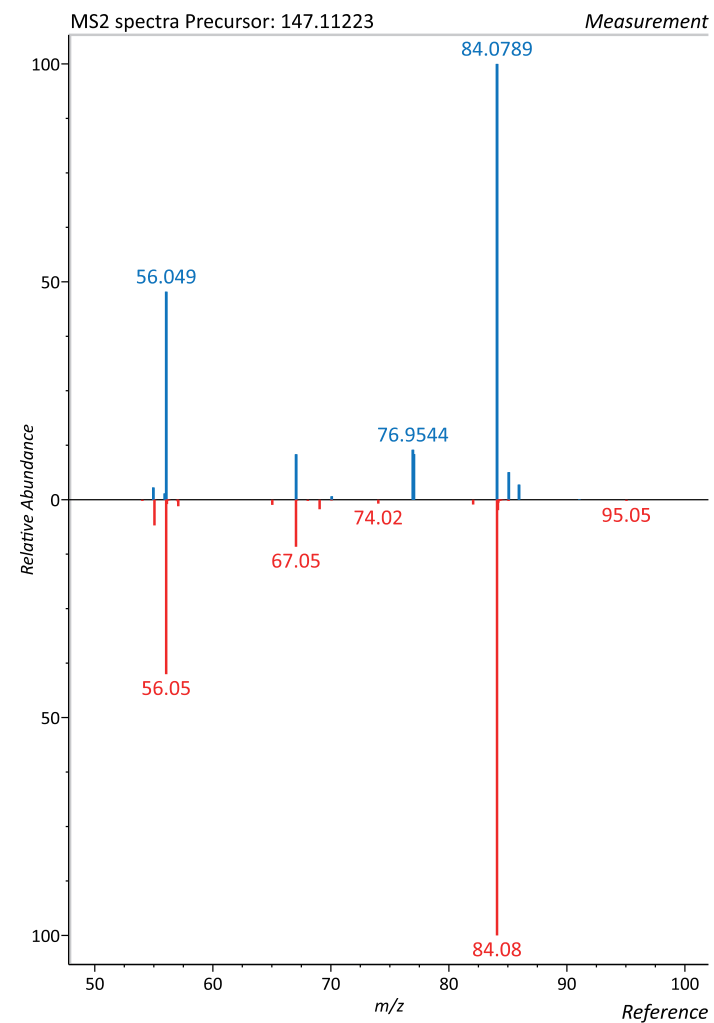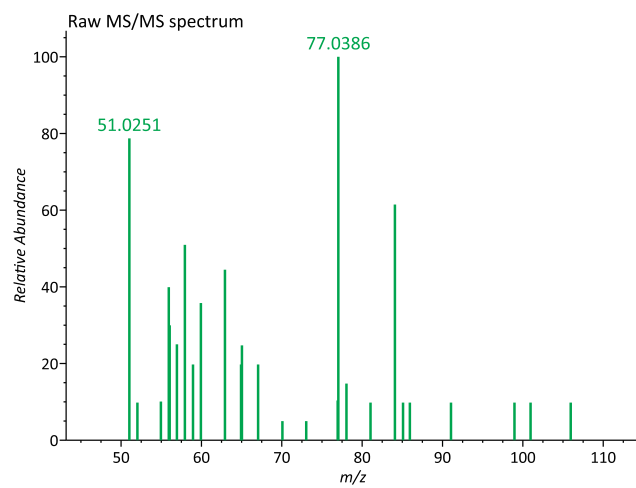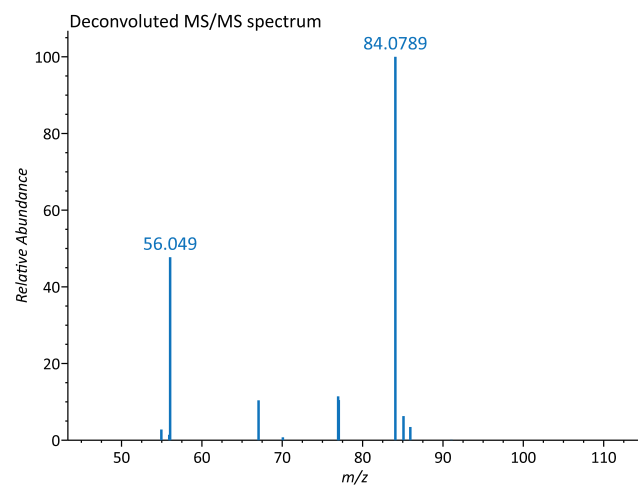

# PC (16:0/0:0)

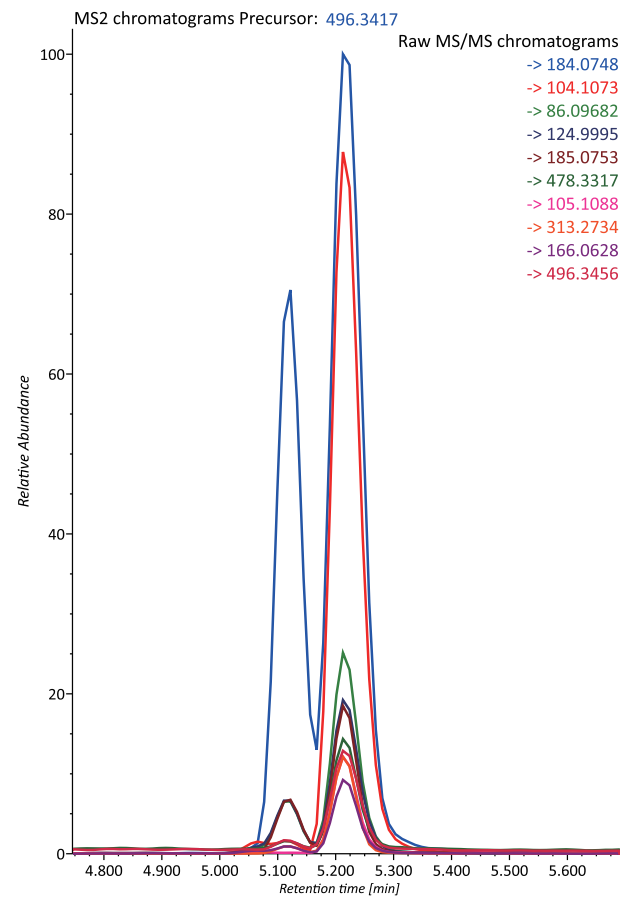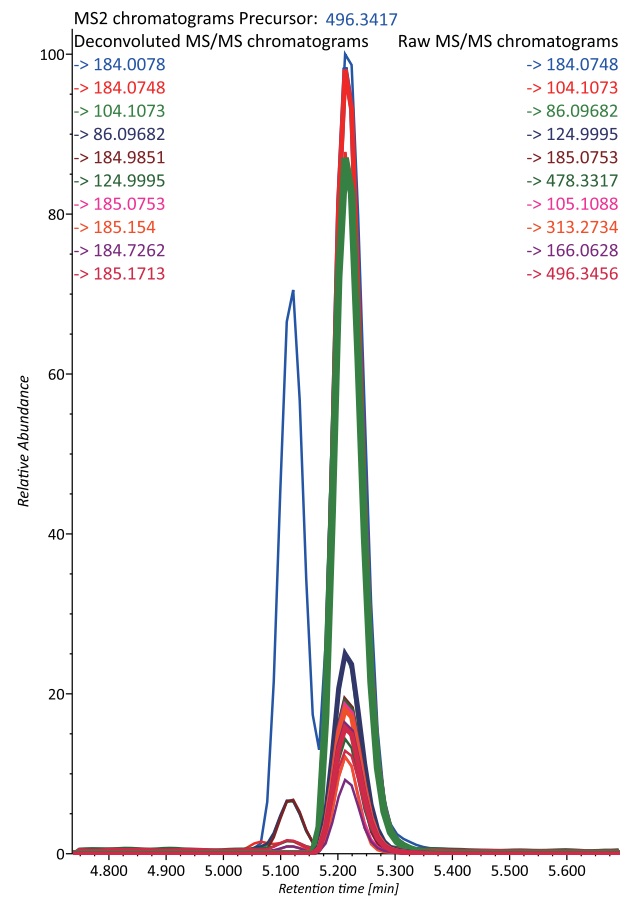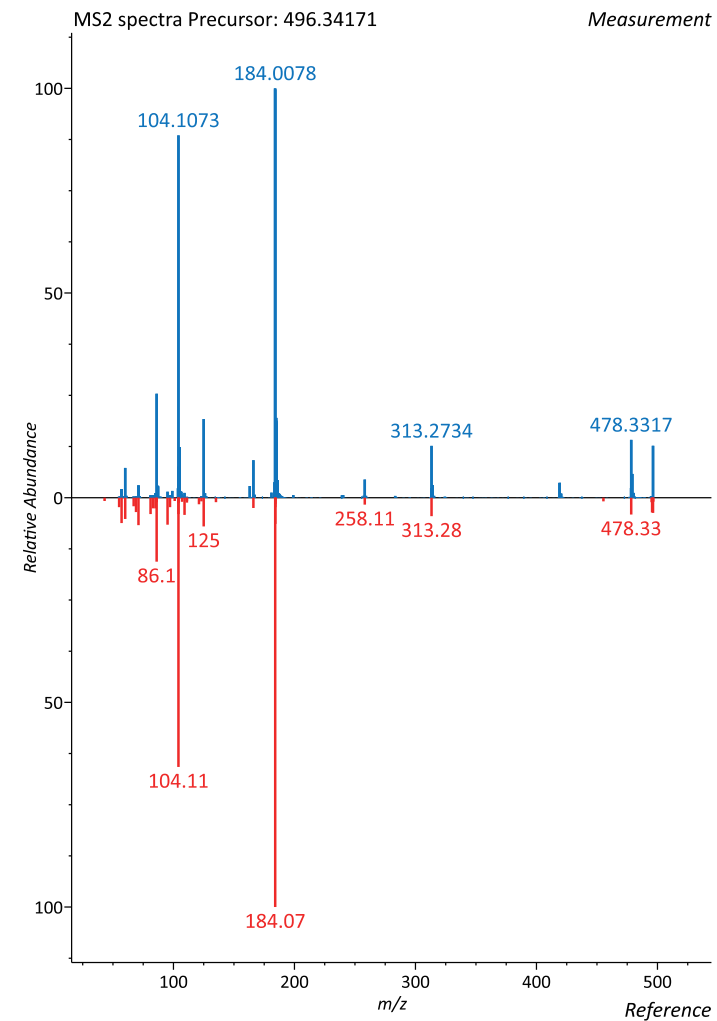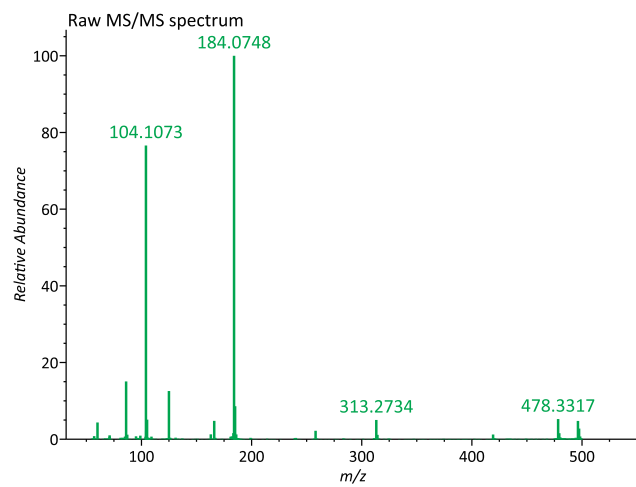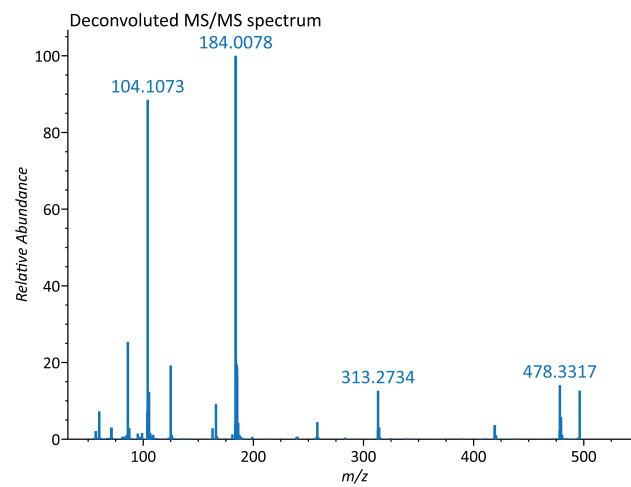



# PC (0:0/16:0)

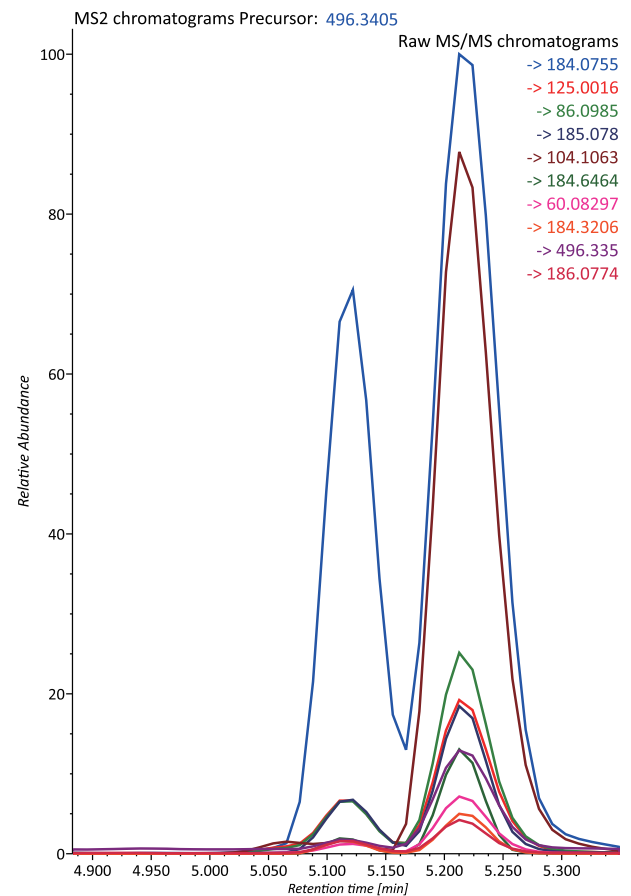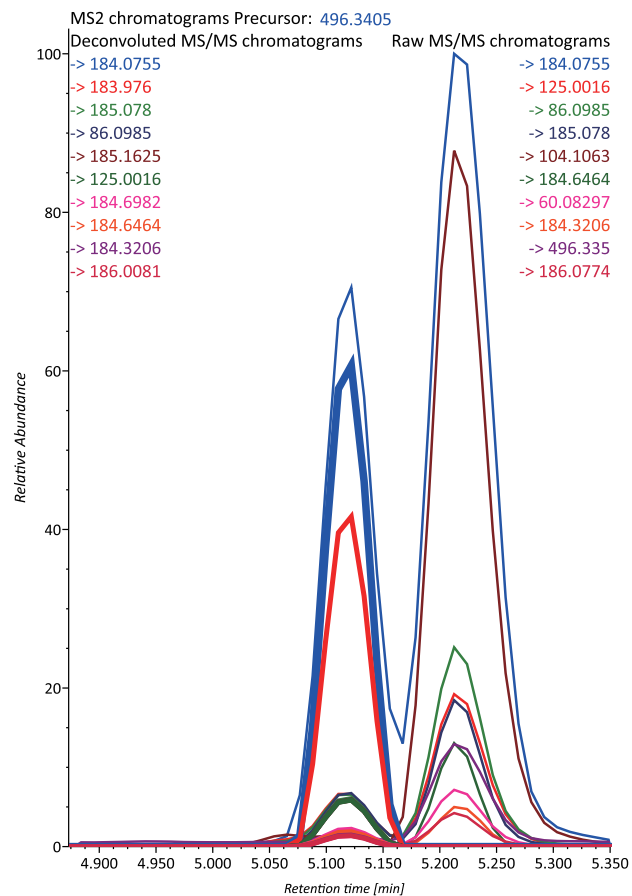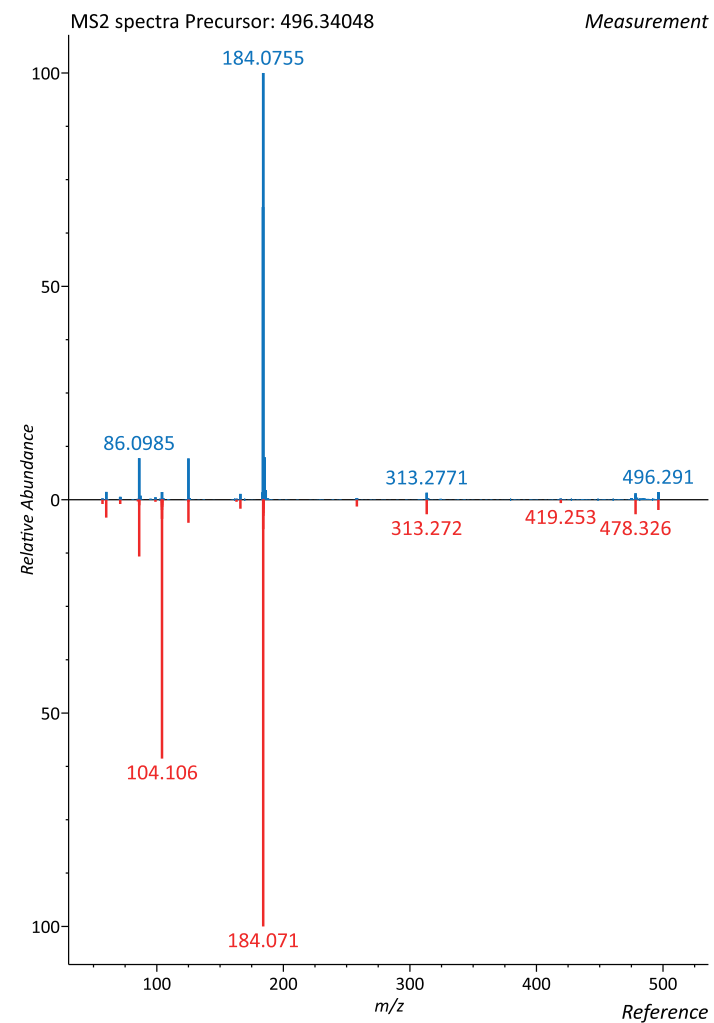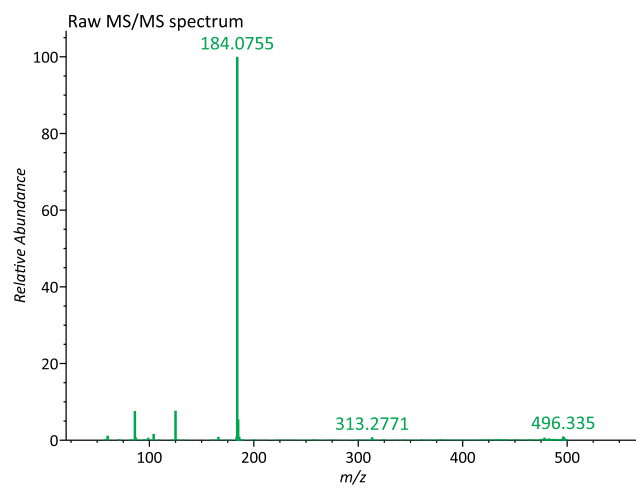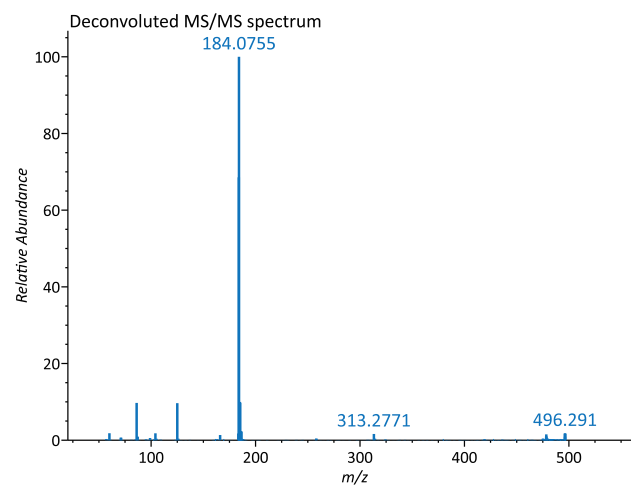

# Phenylalanine

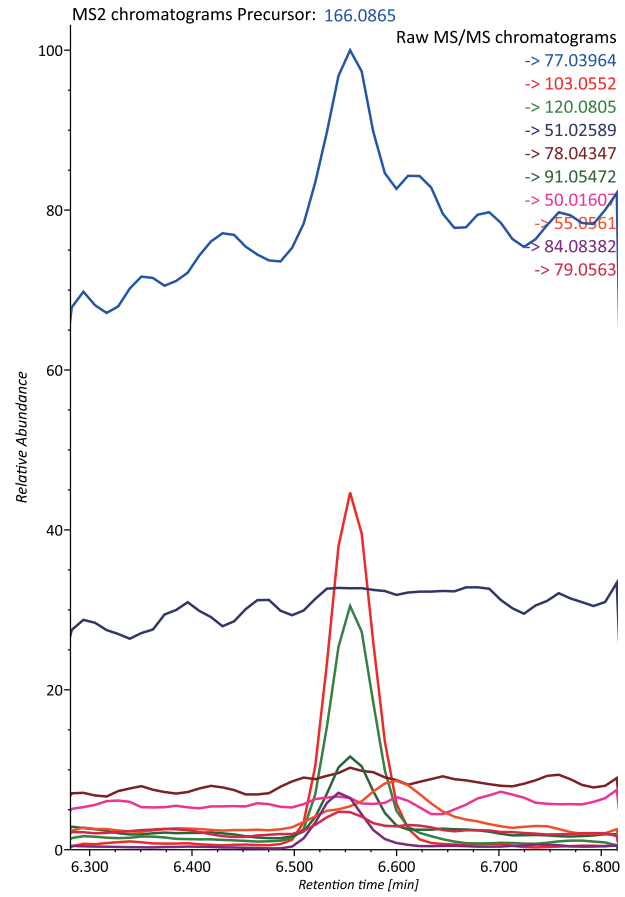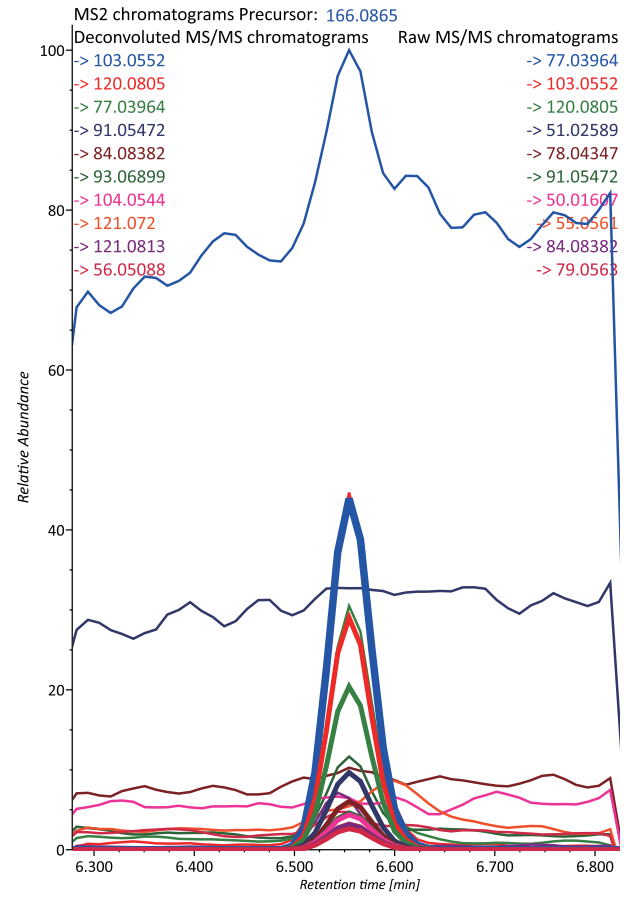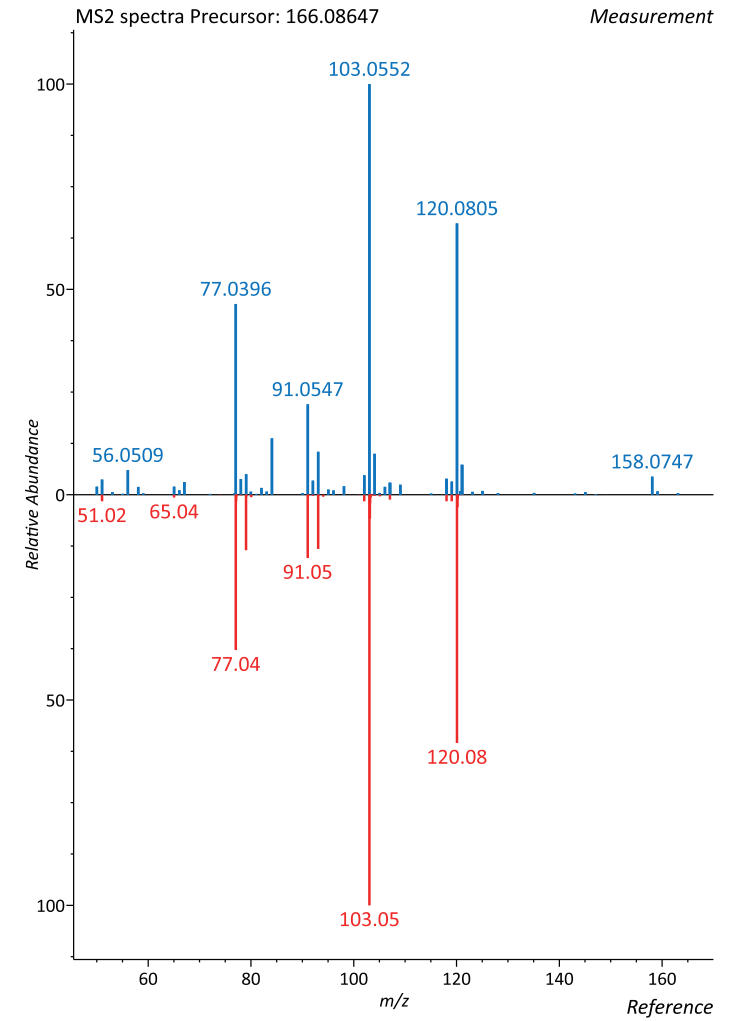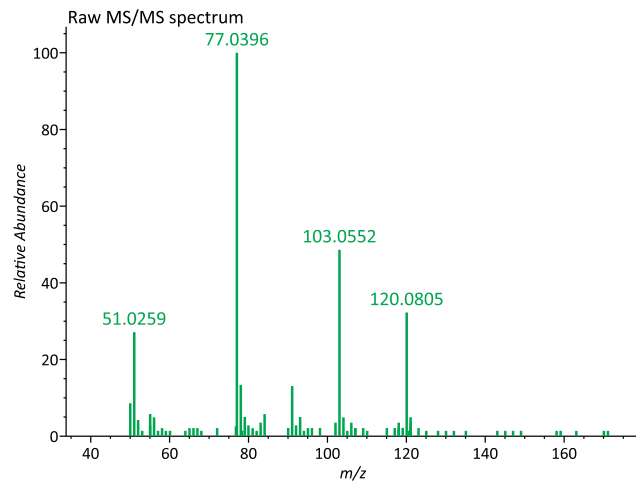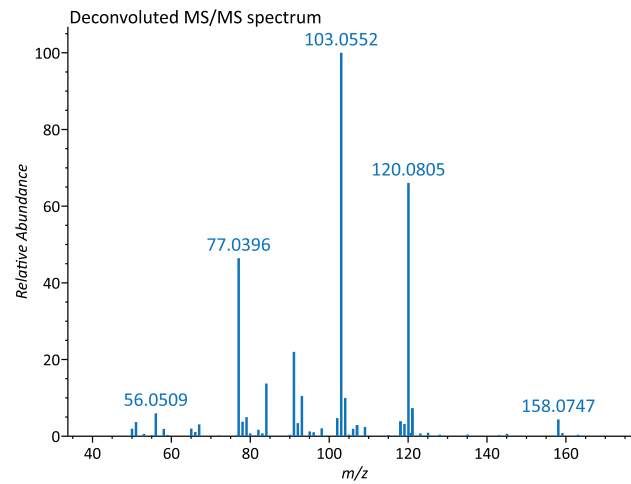

# Phenylalanine-proline

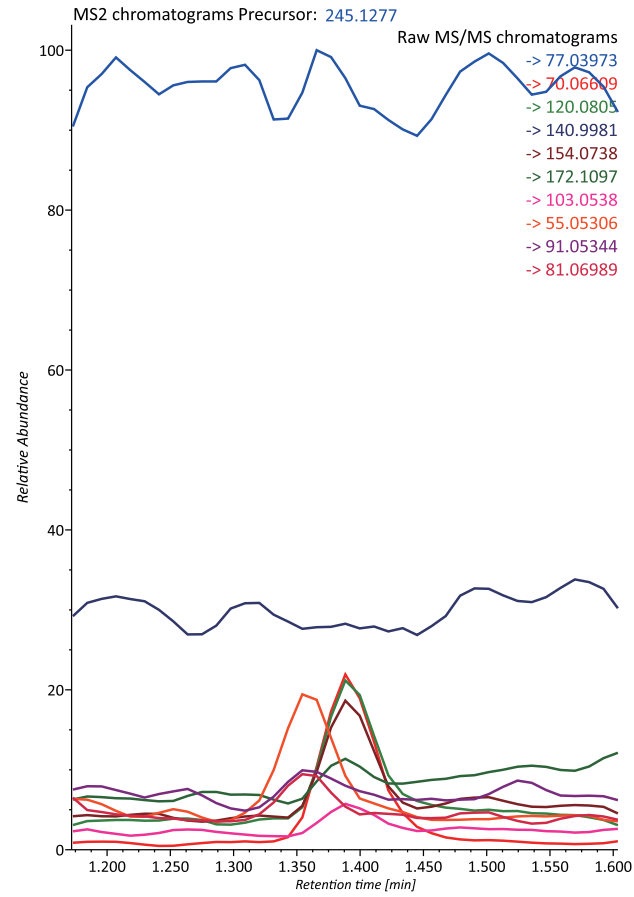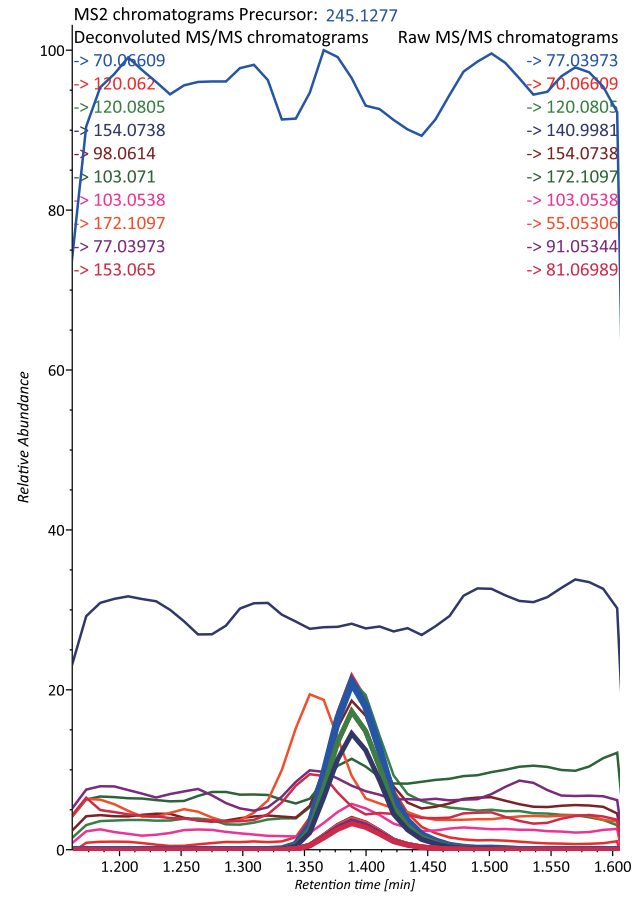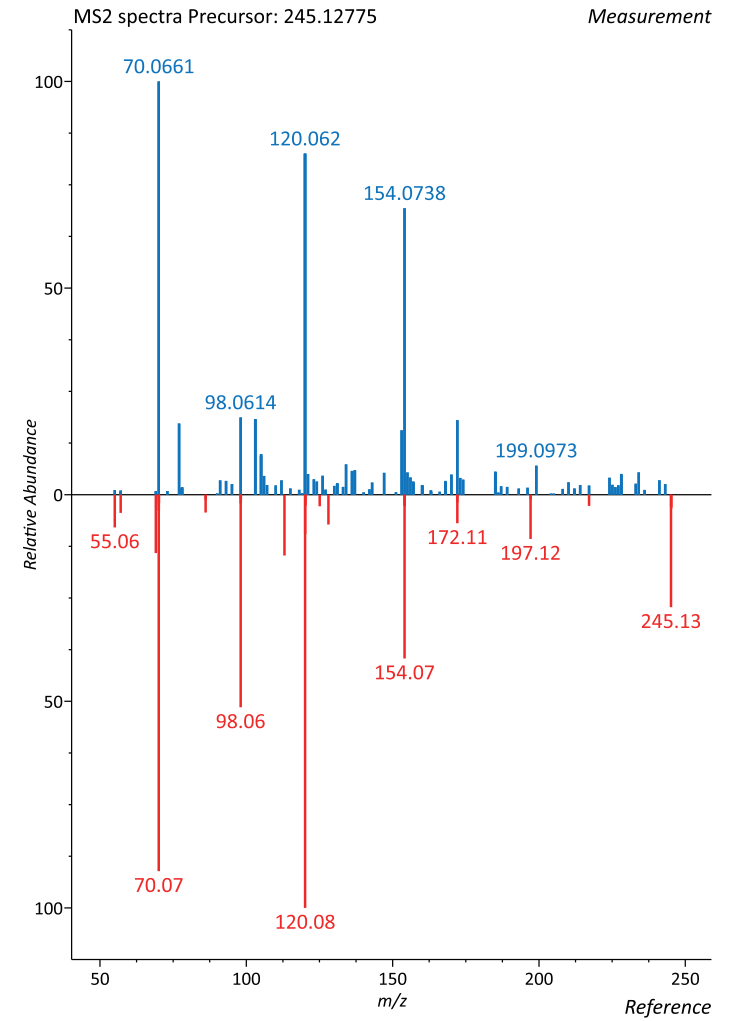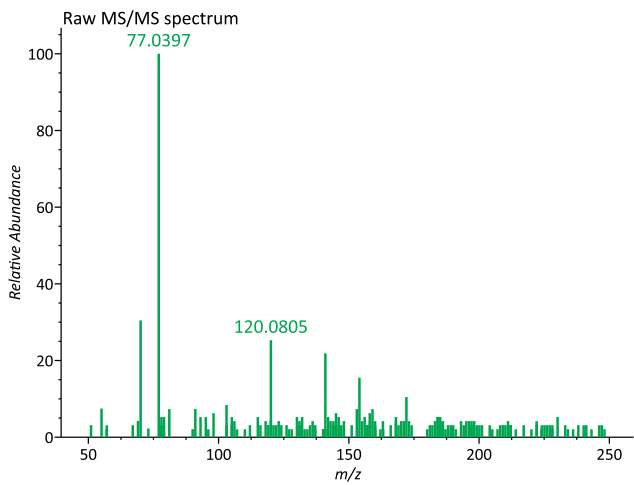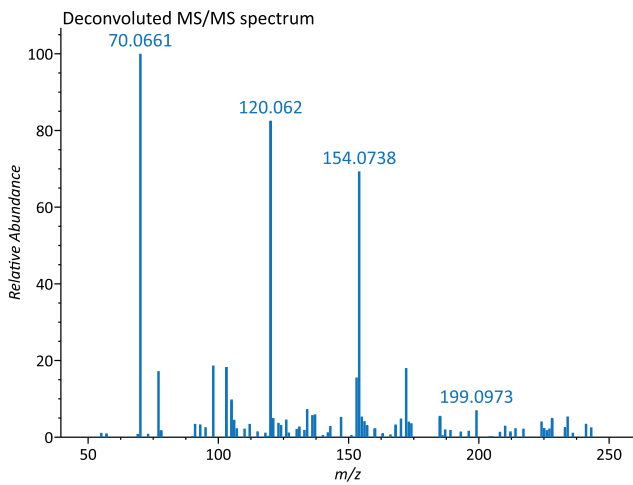

# Pipecolic acid

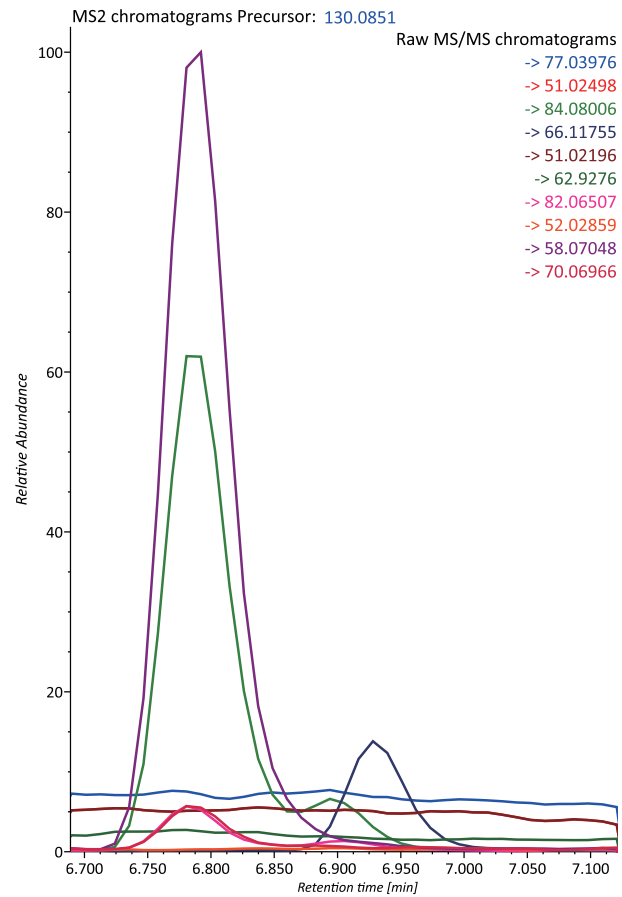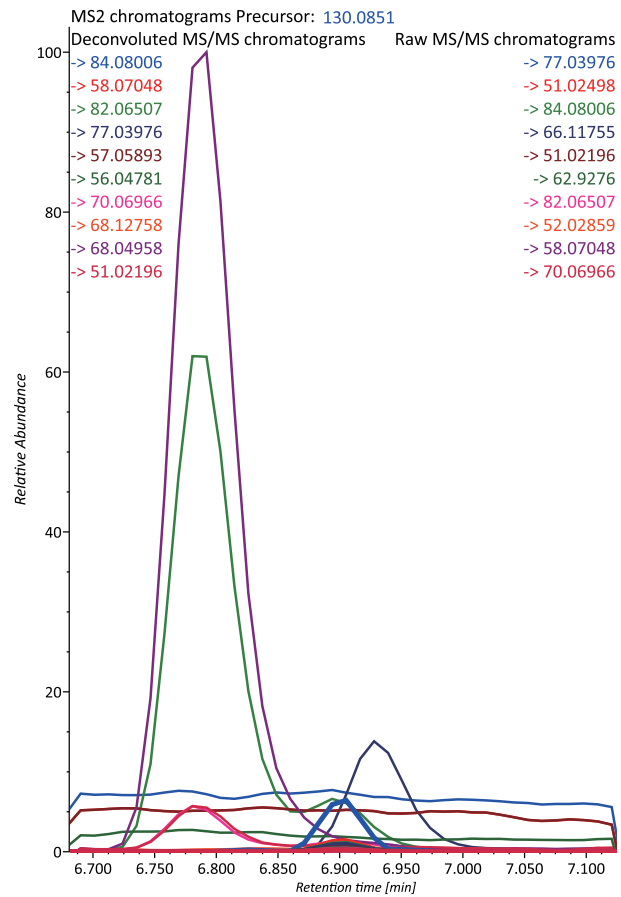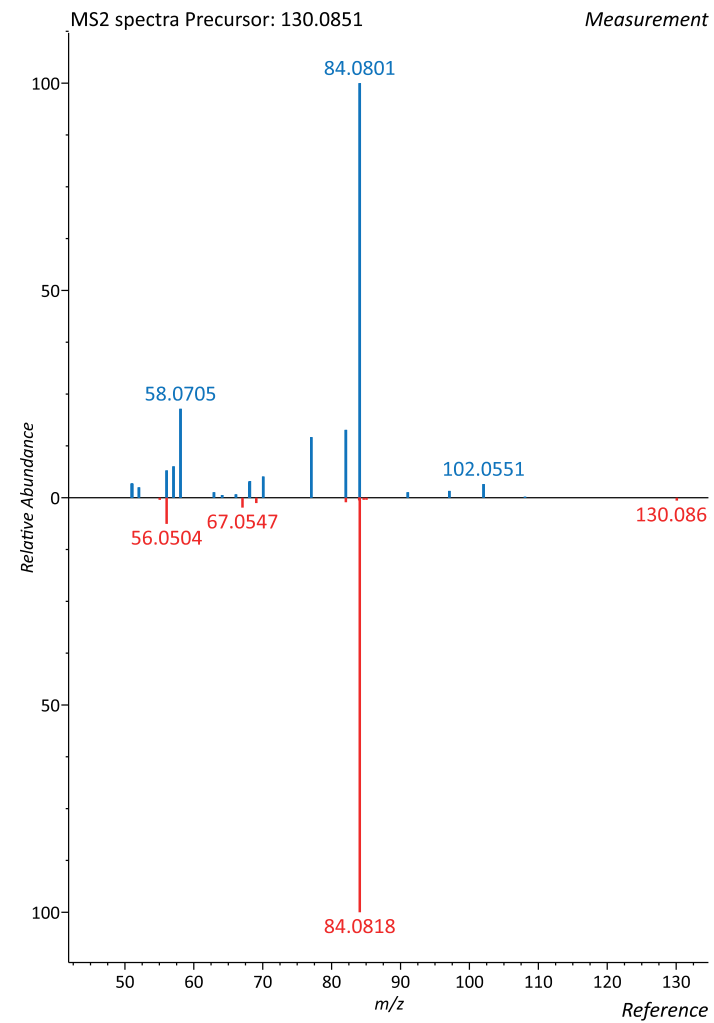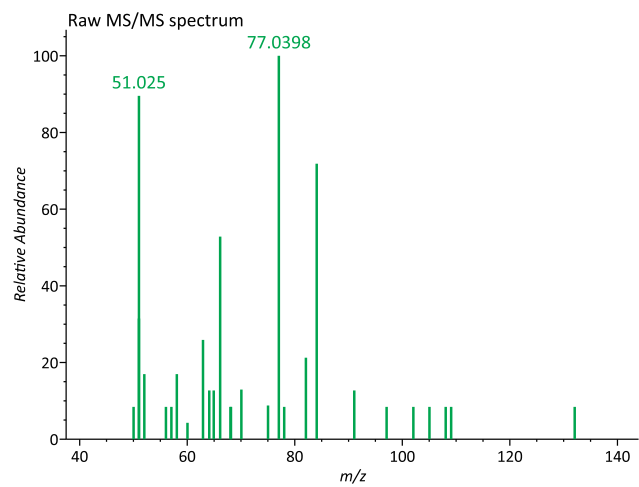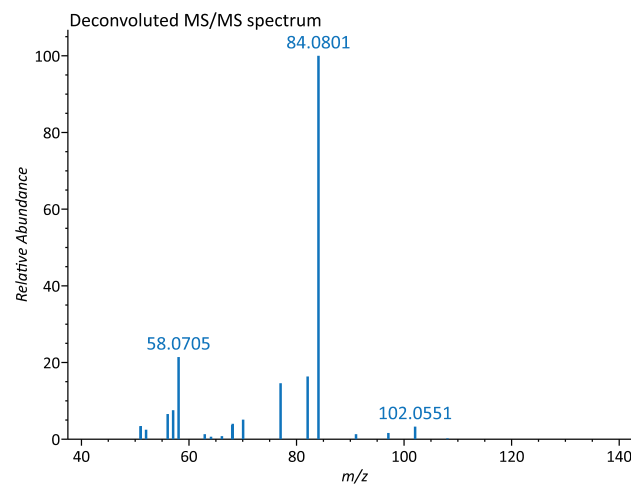

# Proline

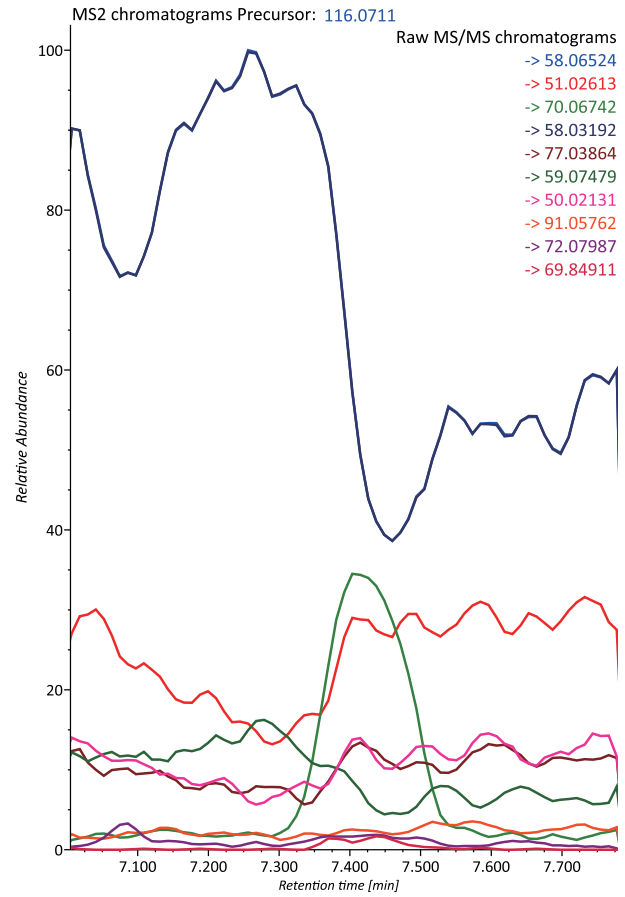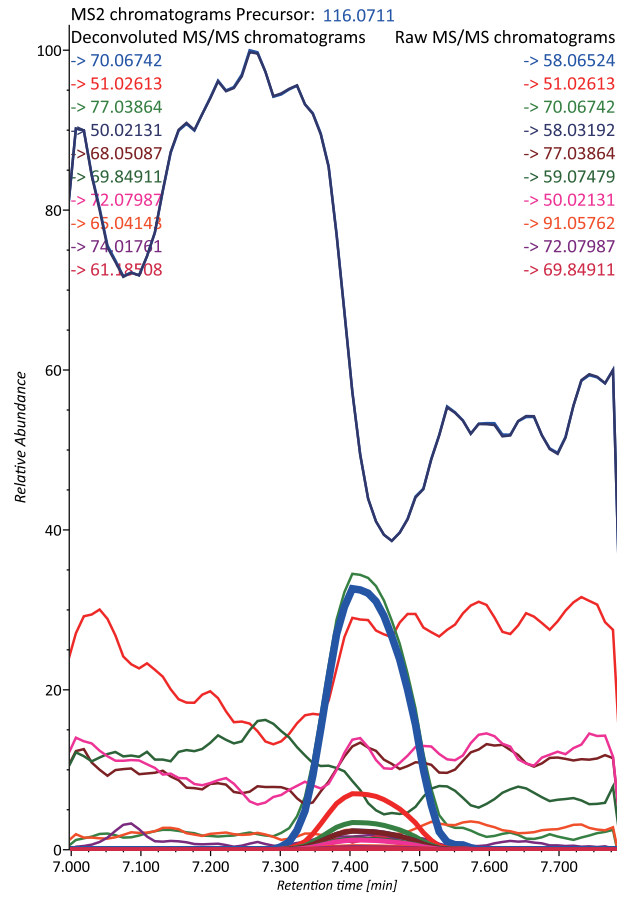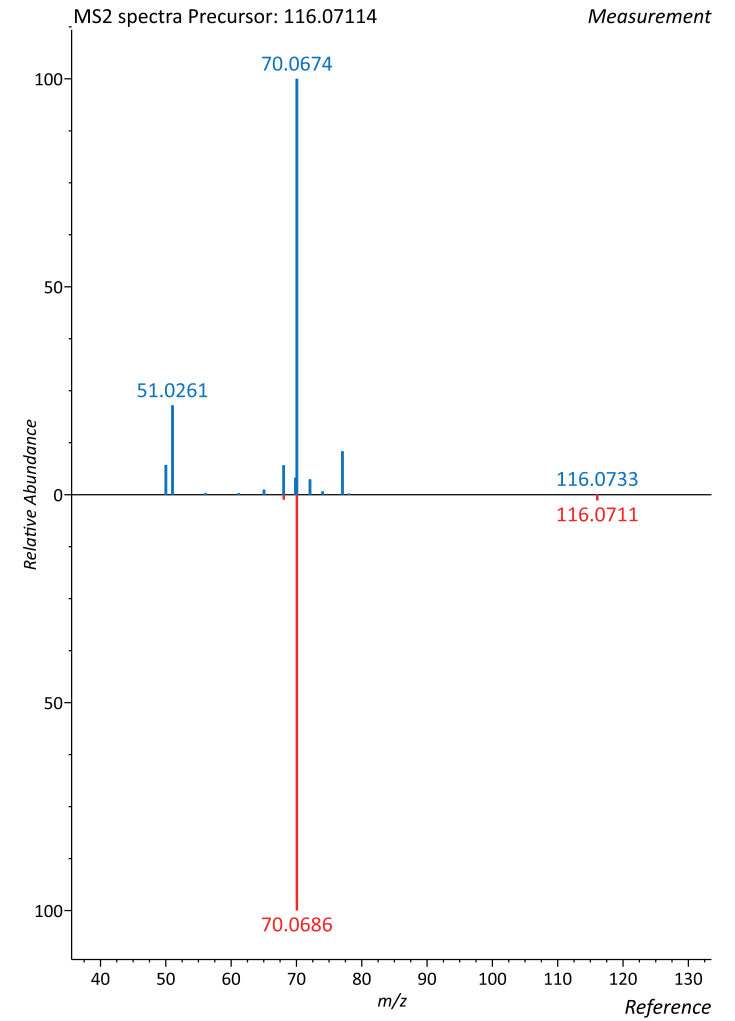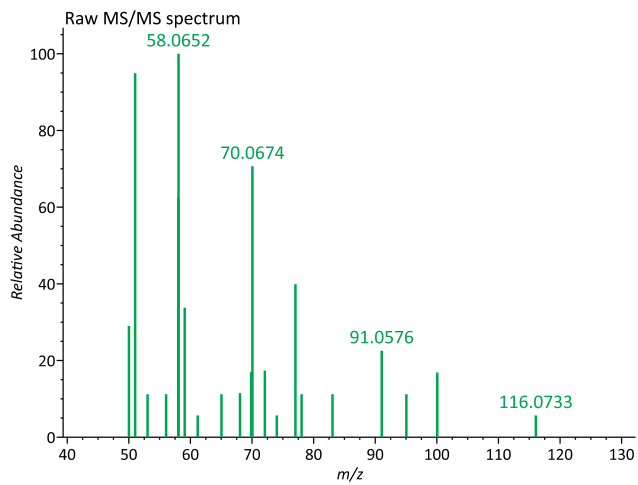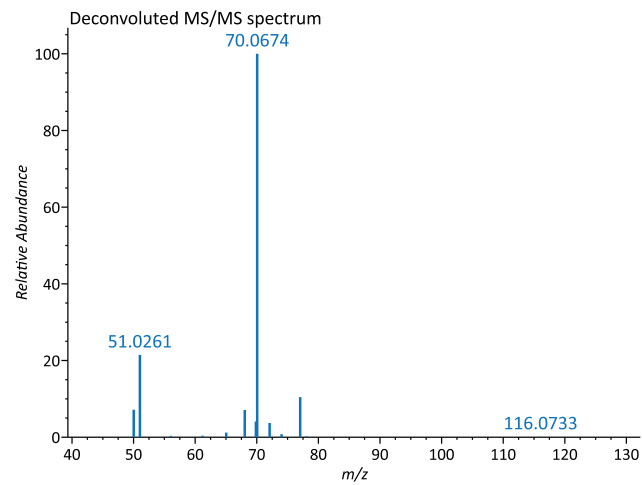

# Pyroglutamic acid

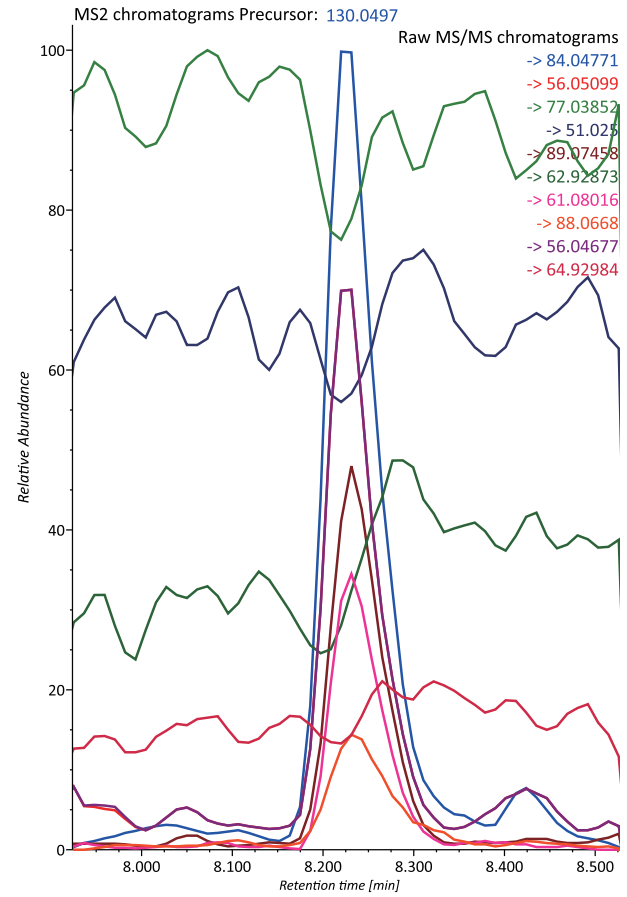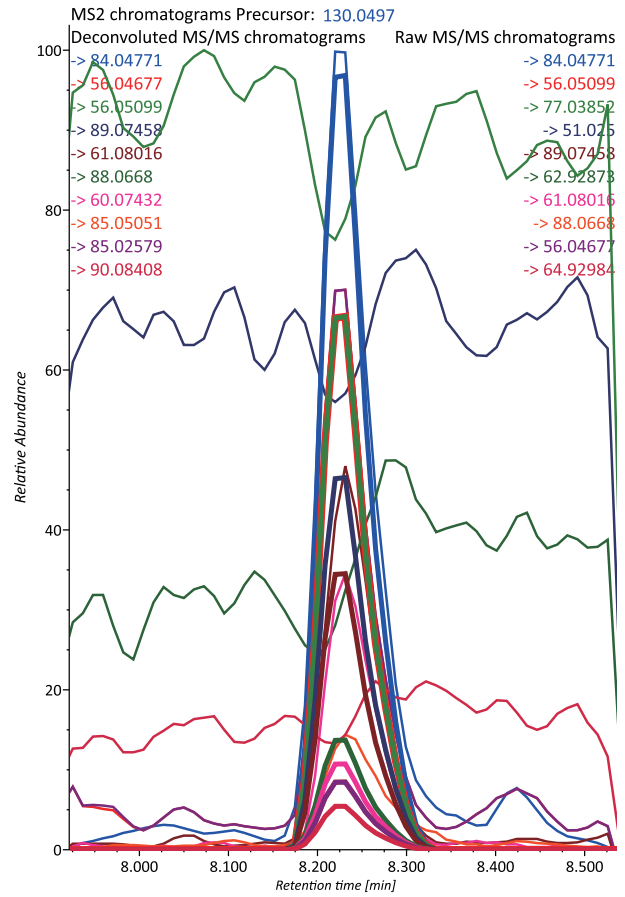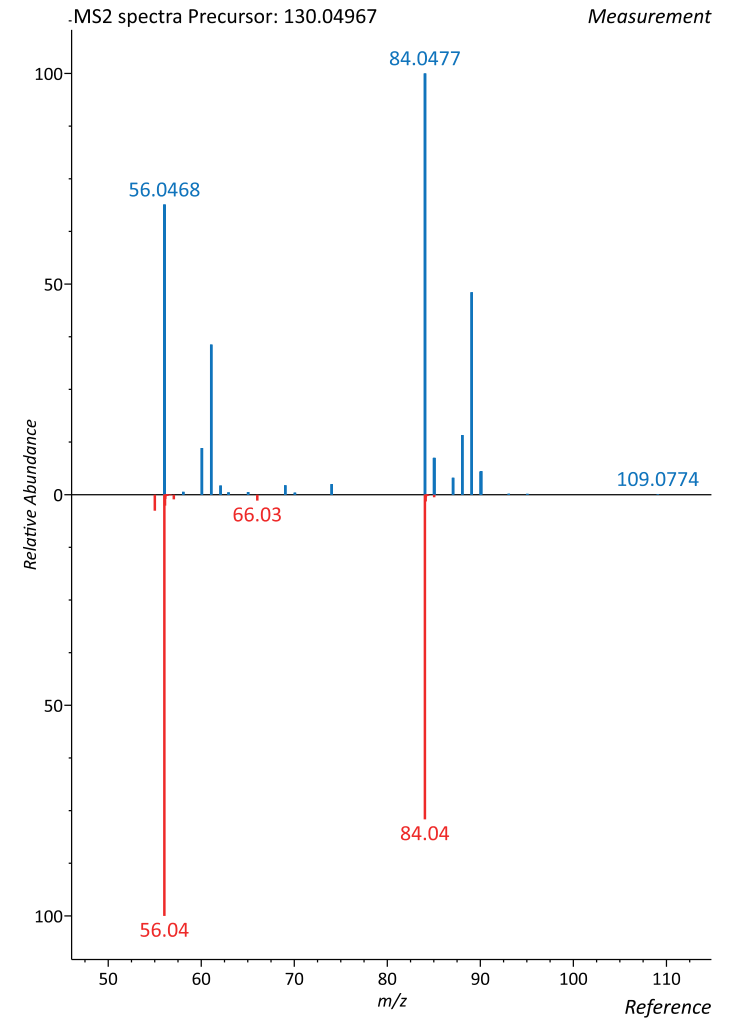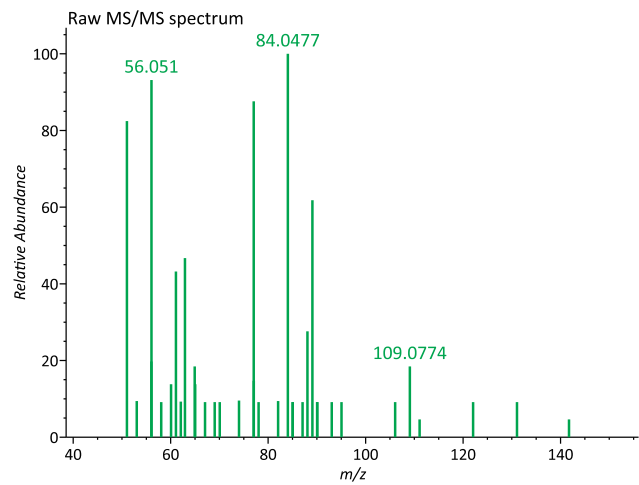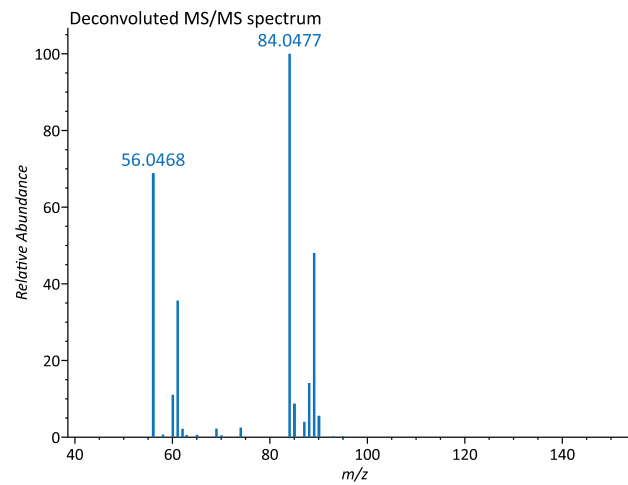

# Cinnamic acid

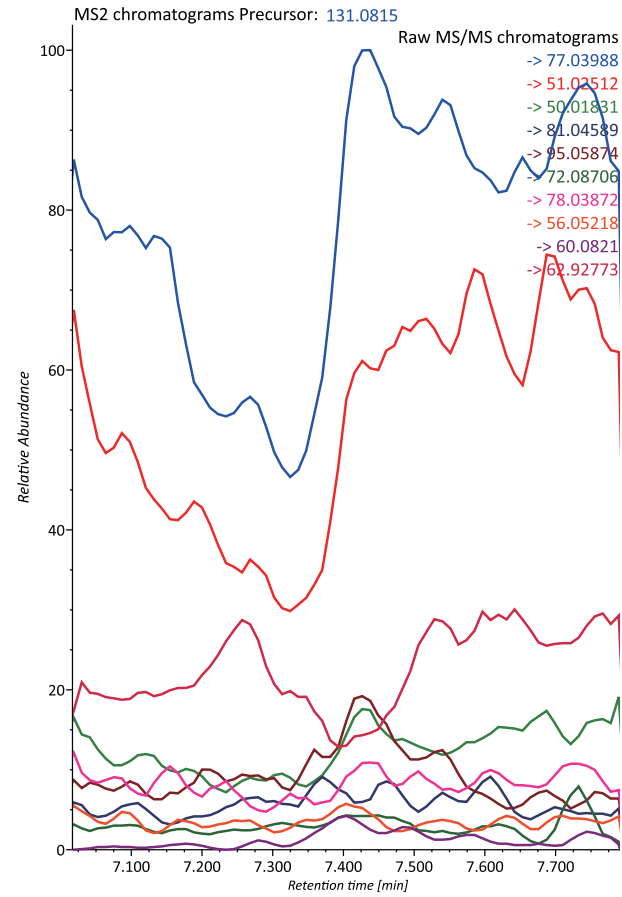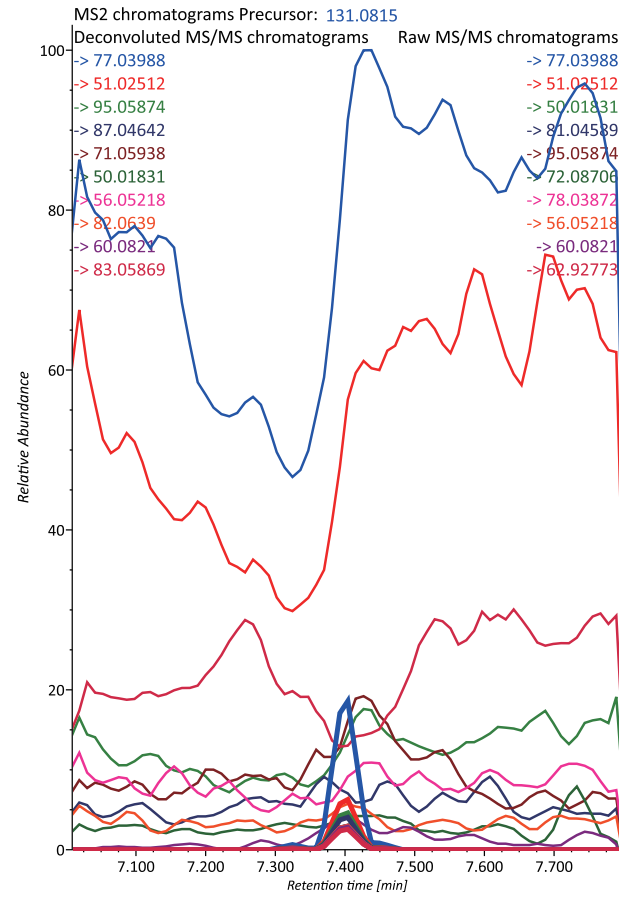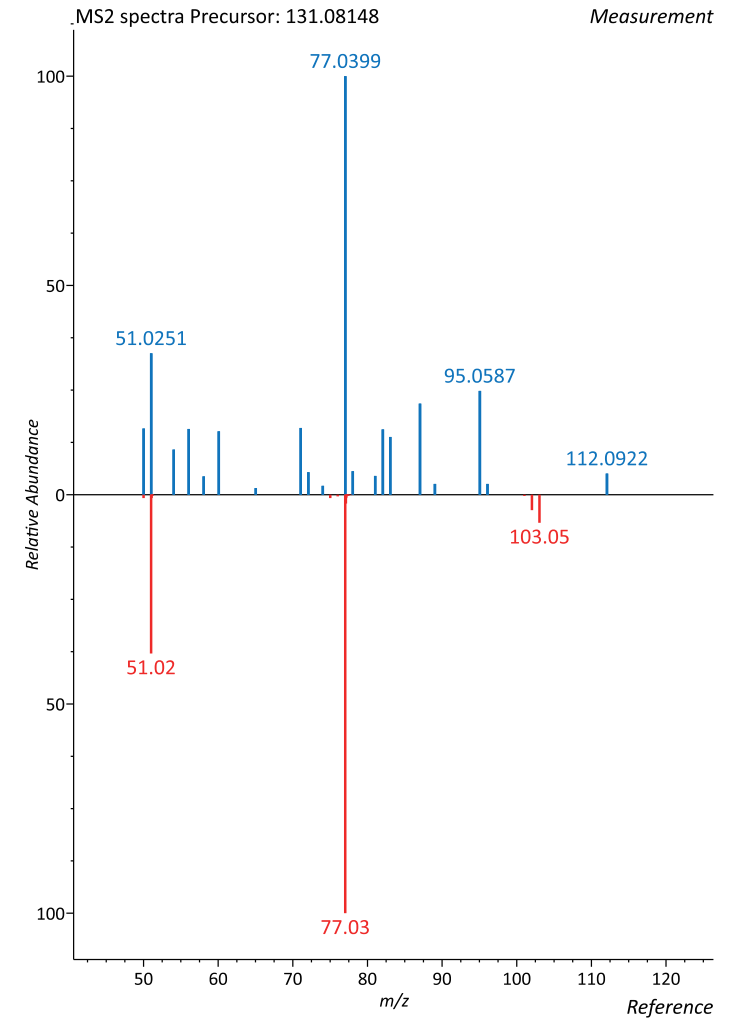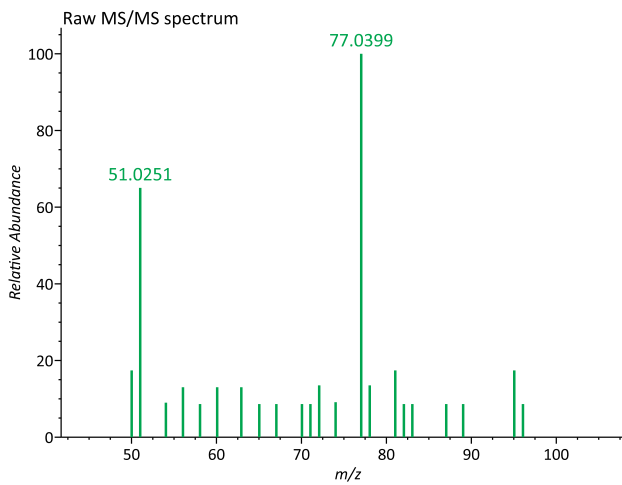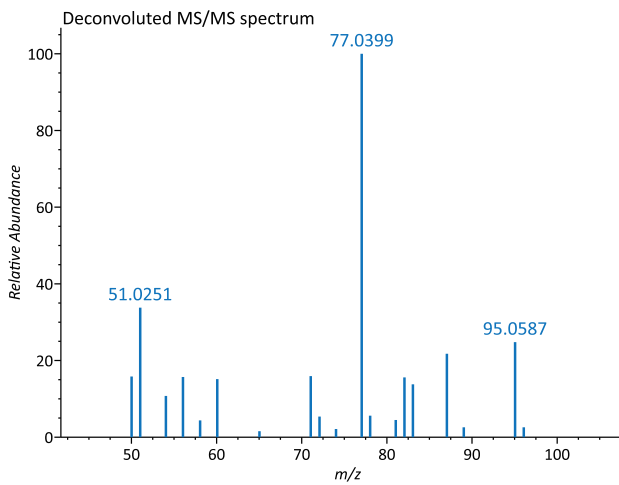

# Trimethylamine N-oxide (TMAO)

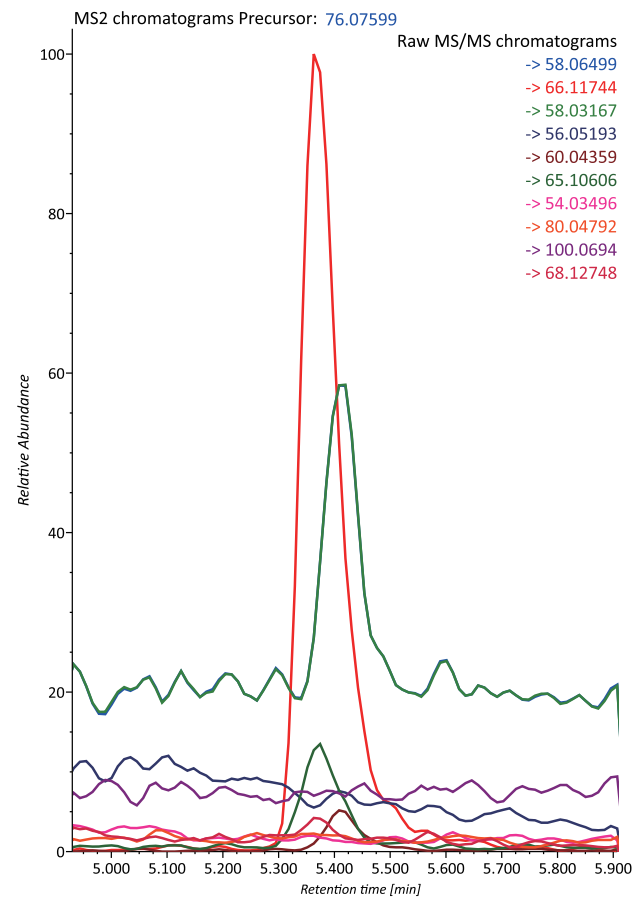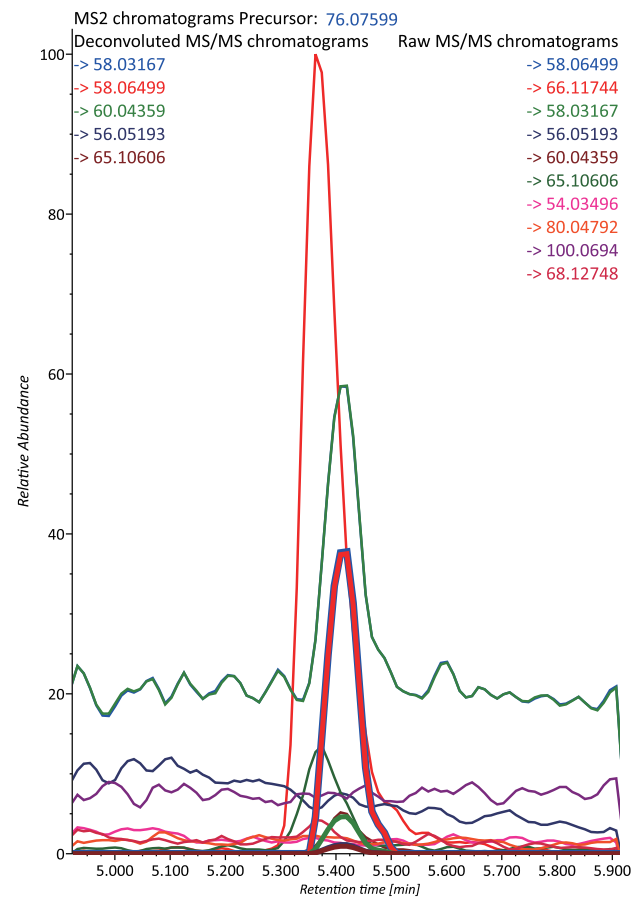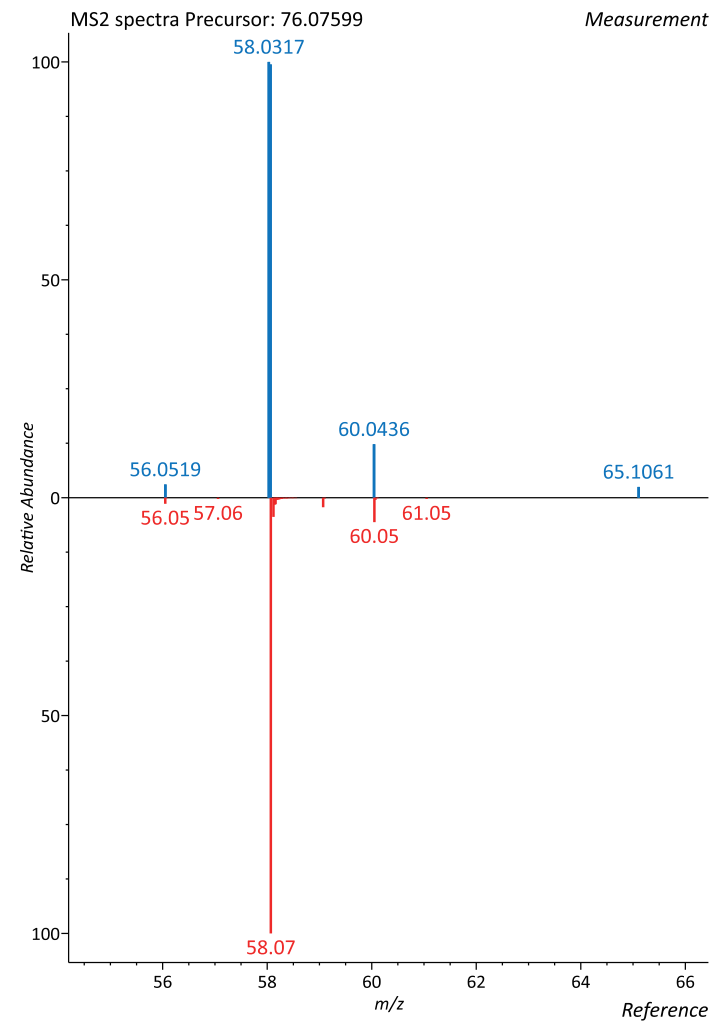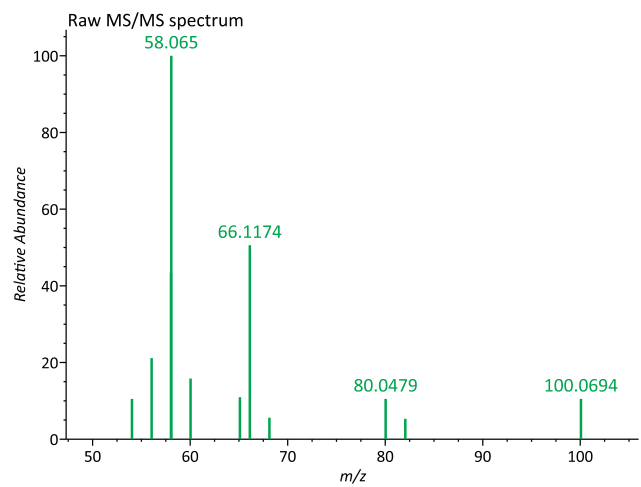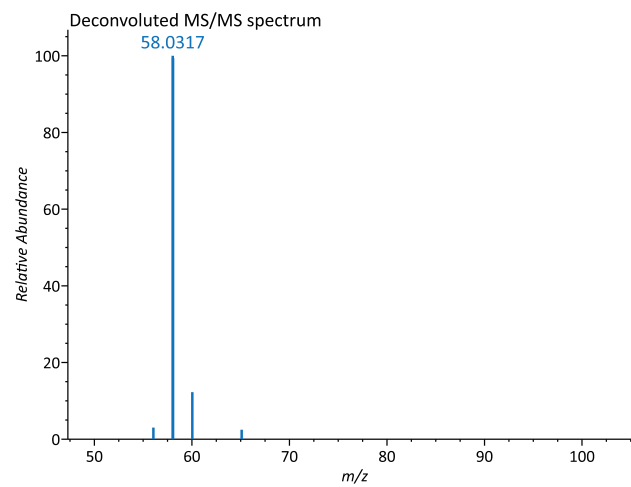



# Tryptophan

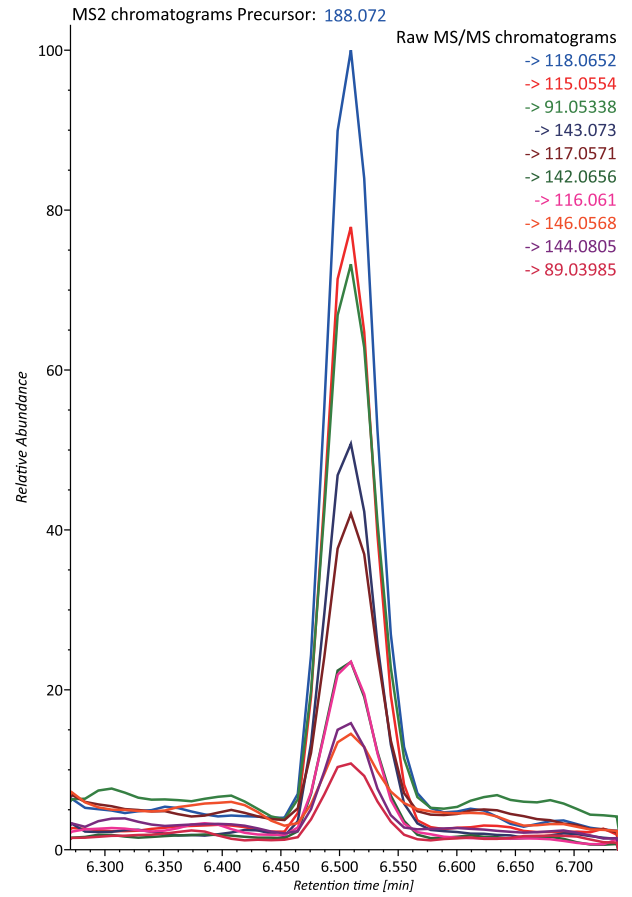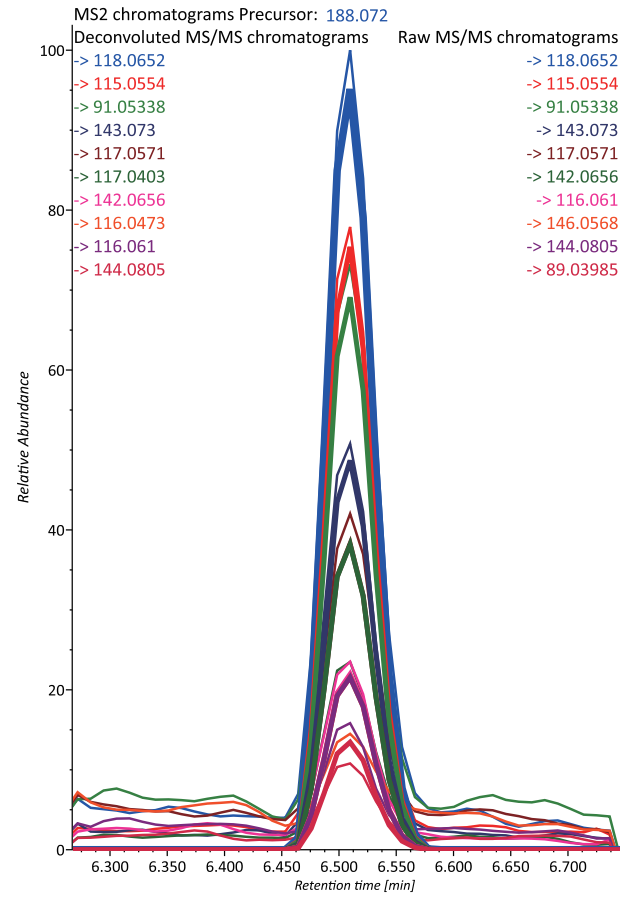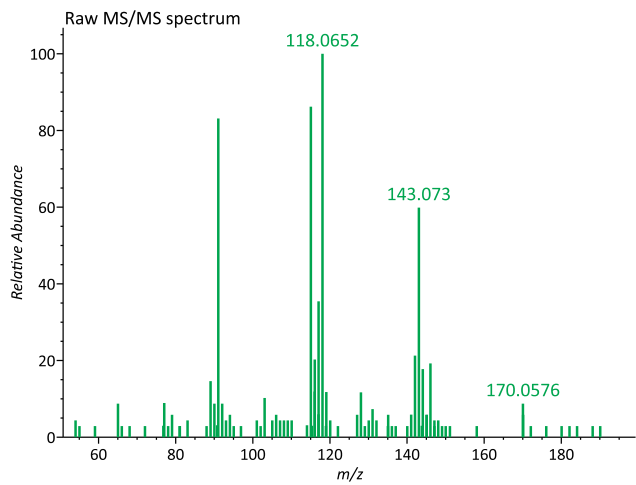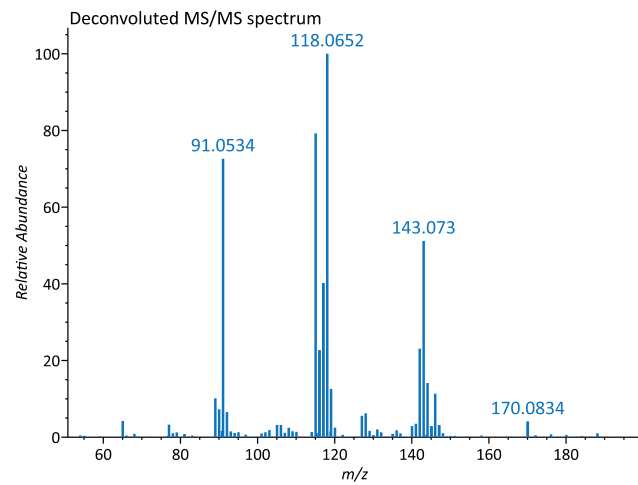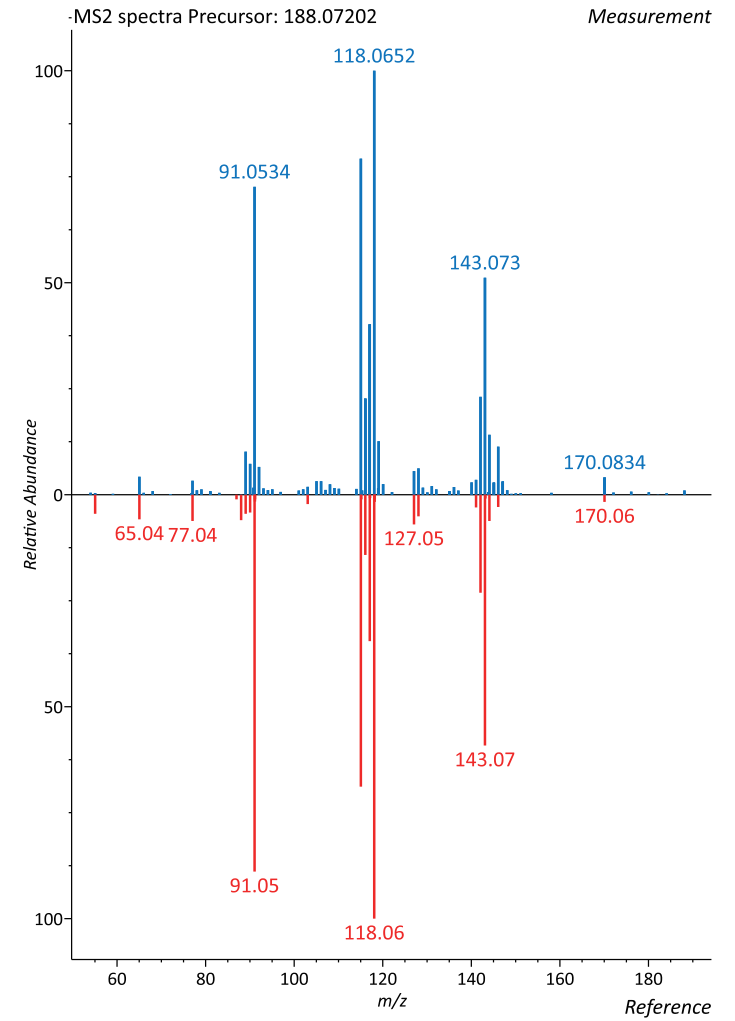

**Supplementary Fig. 2. Comparison of the SQDG MS/MS spectrum in the different precursor window and the accumulation time.** Left panels show the MS/MS spectra of DDA at accumulation time 50 ms. Middle panels show the MS/MS spectra of SWATH acquisition with 21-Da isolation window at accumulation time 10 ms. Right panels show the MS/MS spectra of SWATH acquisition with 65-Da isolation window at accumulation time 30 ms. While  $m/z$  225 and neutral loss fragment ions are not or hardly detected at 10 ms accumulation time, they were well-detected in 30 or 50 ms accumulation time conditions.

# SQDG (14:0/16:0)

DDA

(Q1 window, 1Da; Accumulation time 50 ms)

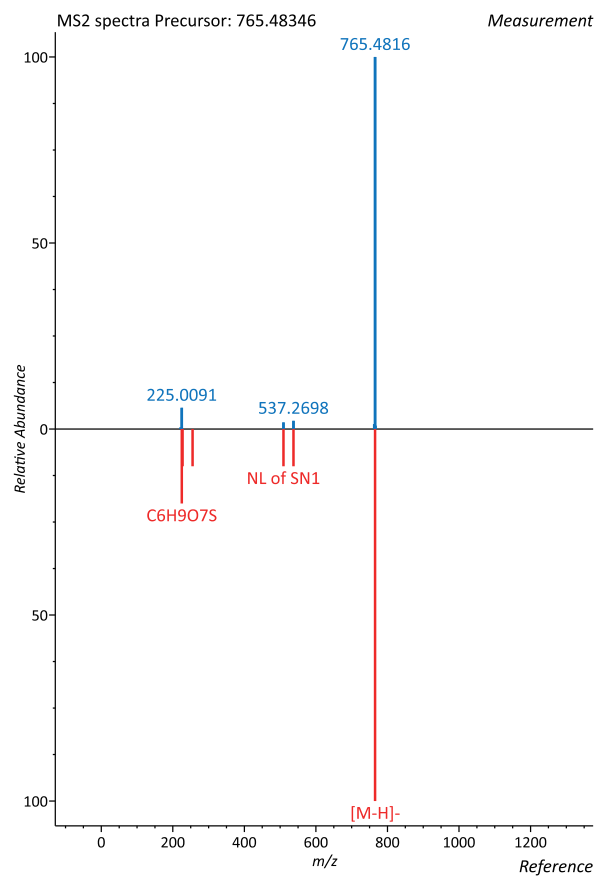

SWATH

(Q1 window, 21 Da; Accumulation time 10 ms)

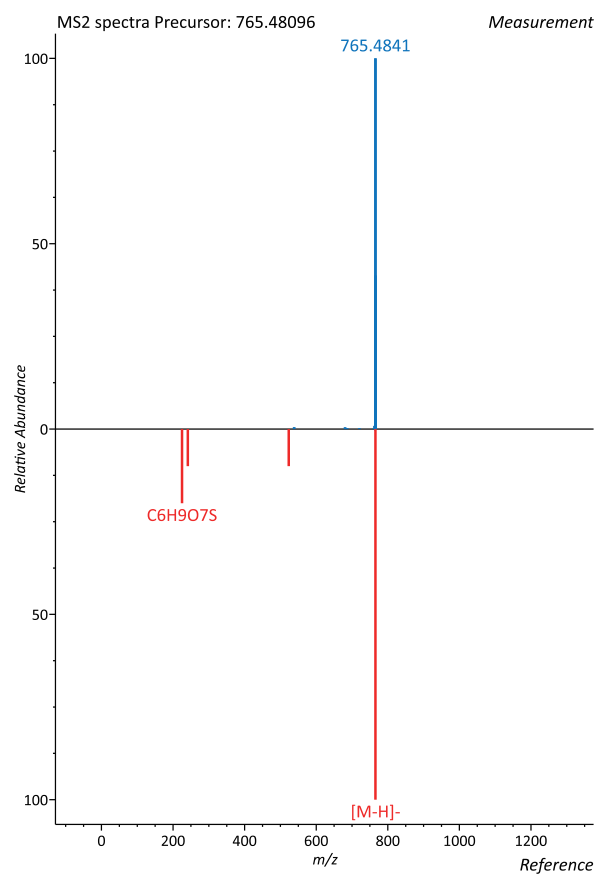

SWATH

(Q1 window, 65 Da; Accumulation time 30 ms)

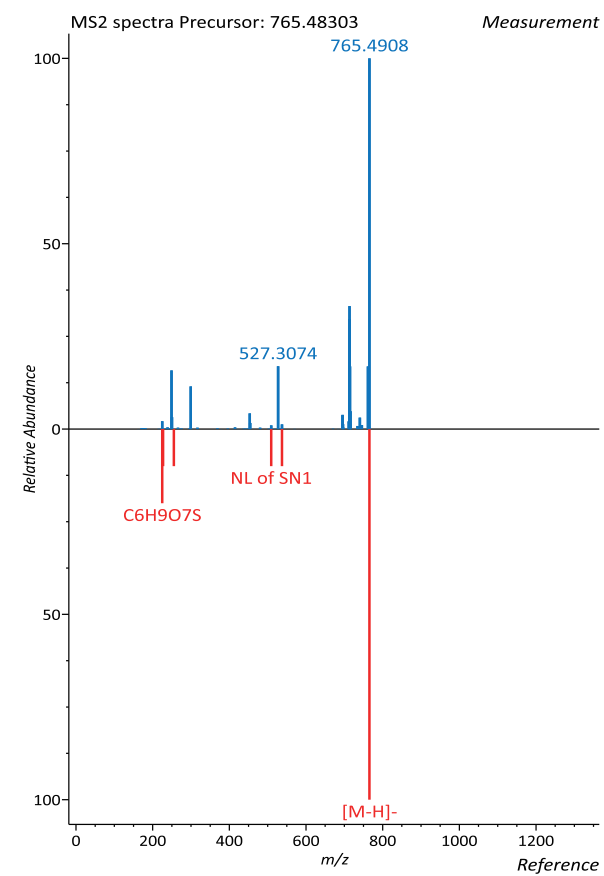

# SQDG (16:0/16:0)

DDA

(Q1 window, 1Da; Accumulation time 50 ms)

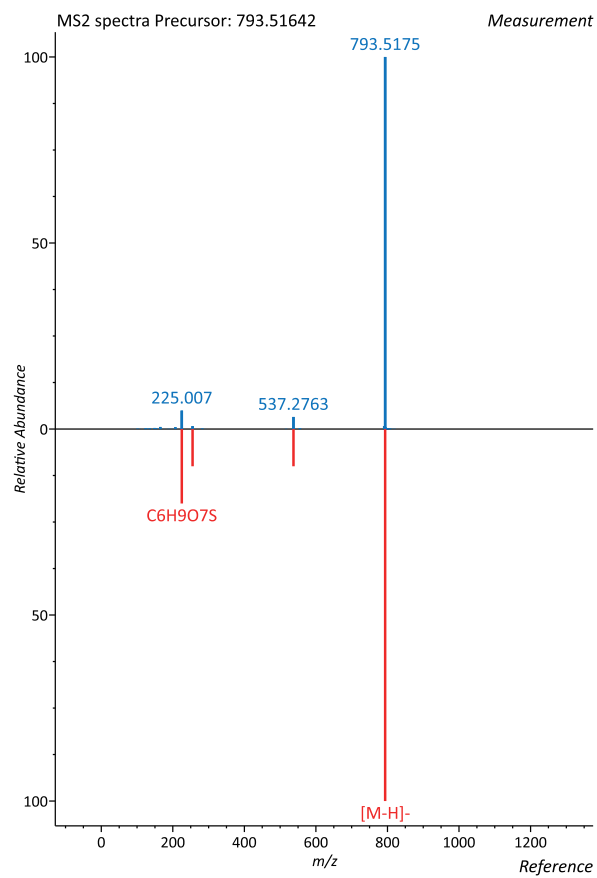

SWATH

(Q1 window, 21 Da; Accumulation time 10 ms)

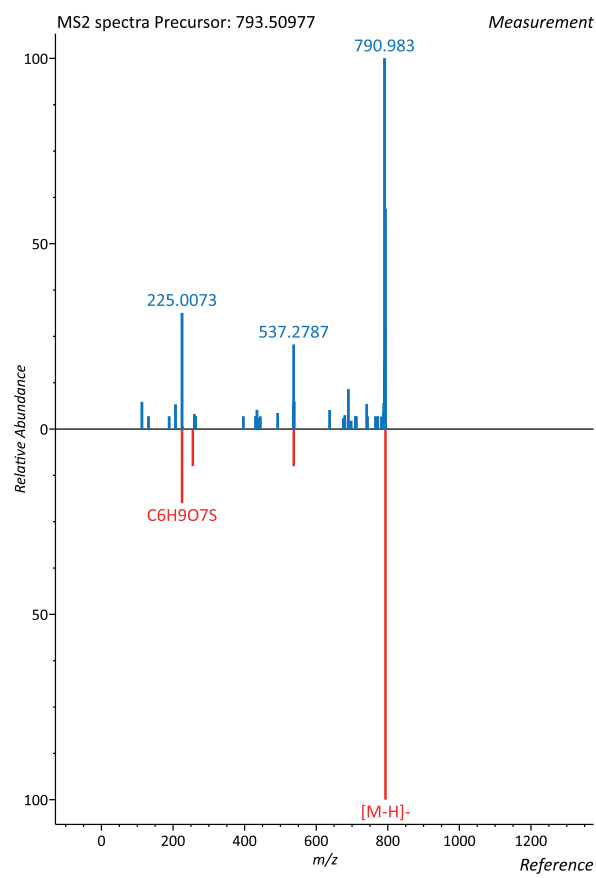

SWATH

(Q1 window, 65 Da; Accumulation time 30 ms)

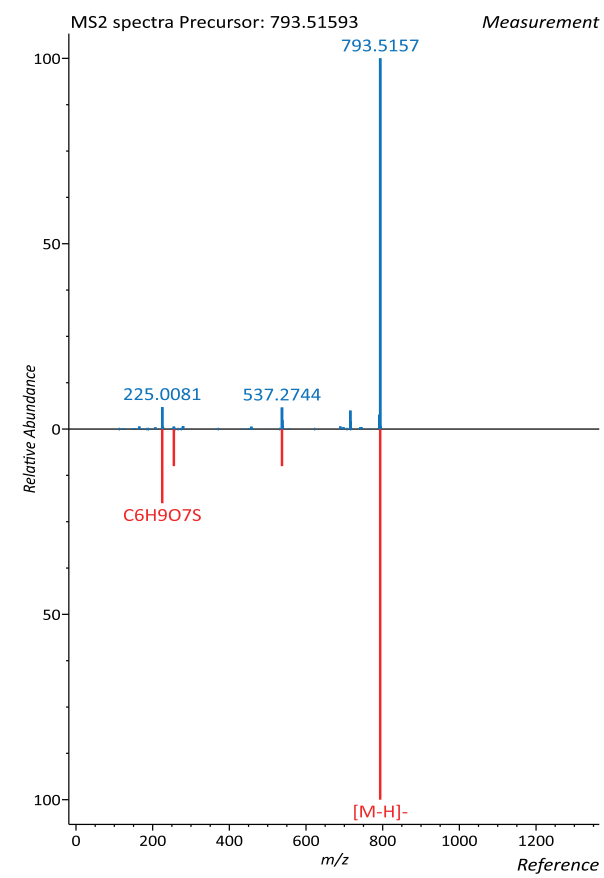

# SQDG (16:0/18:1)

DDA

(Q1 window, 1Da; Accumulation time 50 ms)

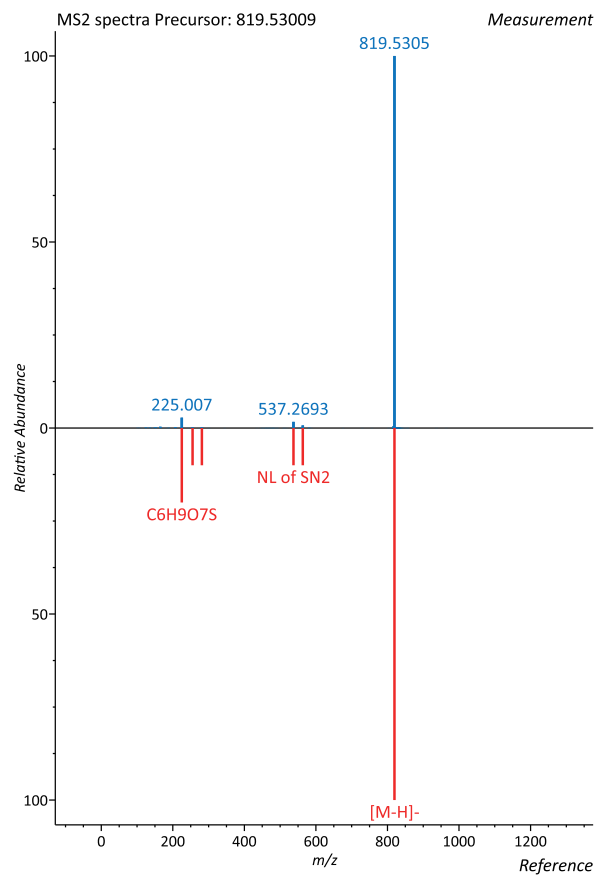

SWATH

(Q1 window, 21 Da; Accumulation time 10 ms)

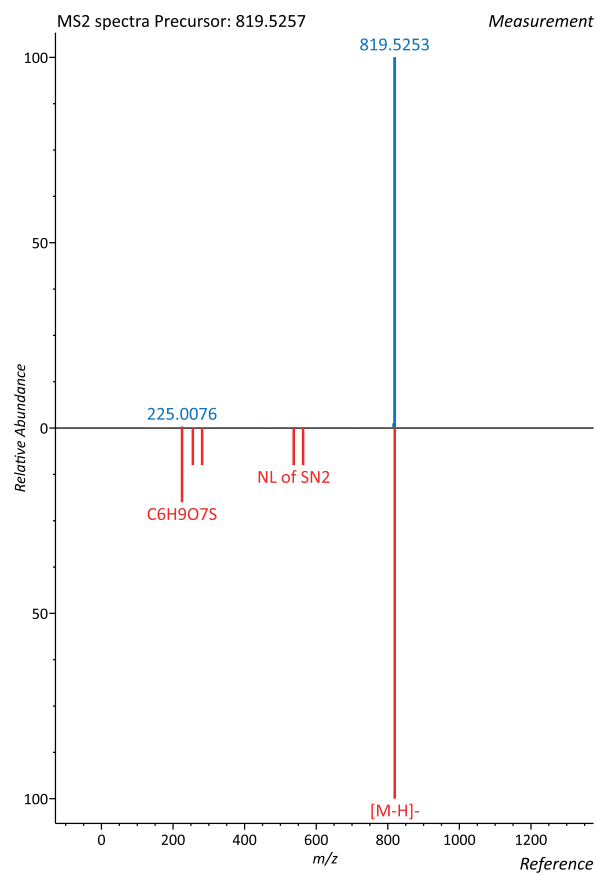

SWATH

(Q1 window, 65 Da; Accumulation time 30 ms)

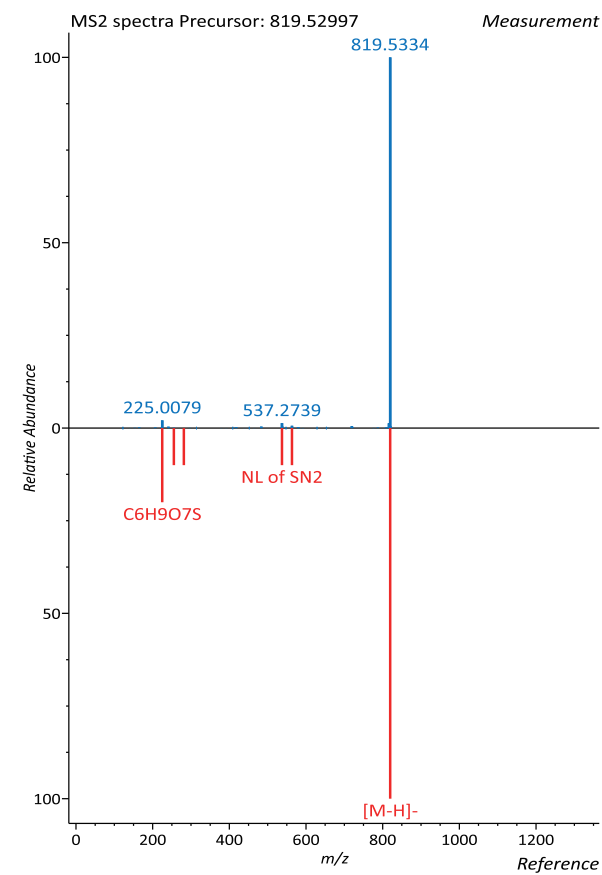

# SQDG (16:0/18:2)

DDA

(Q1 window, 1Da; Accumulation time 50 ms)

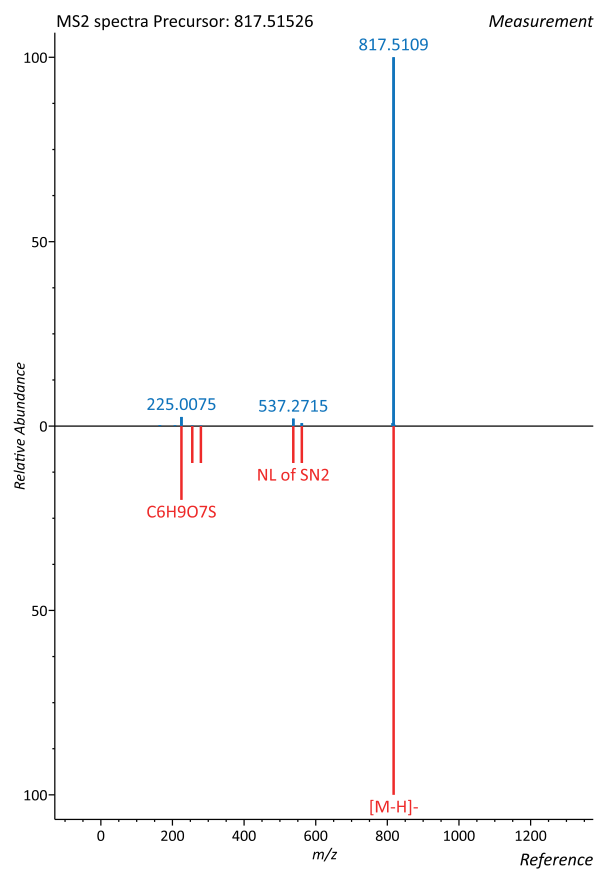

SWATH

(Q1 window, 21 Da; Accumulation time 10 ms)

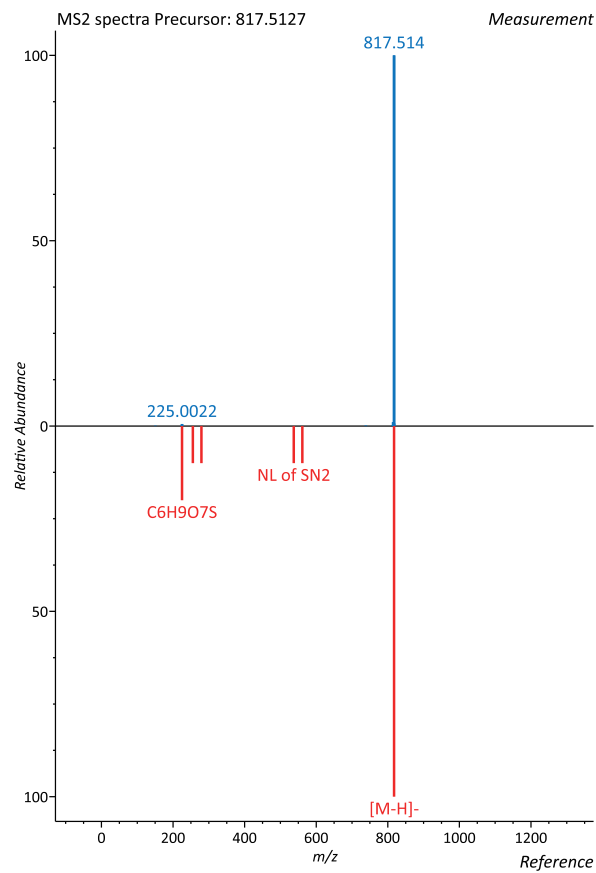

SWATH

(Q1 window, 65 Da; Accumulation time 30 ms)

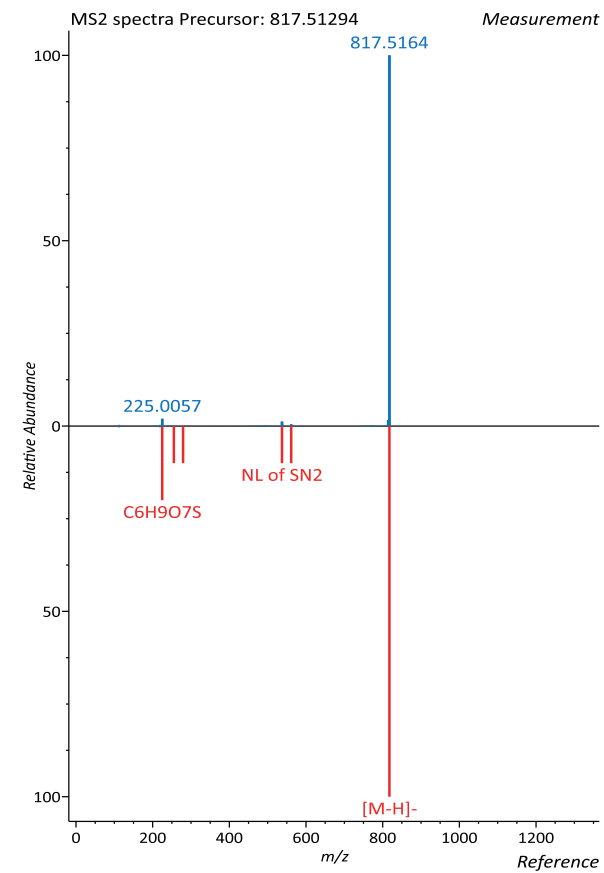

# SQDG (16:0/18:3)

DDA

(Q1 window, 1Da; Accumulation time 50 ms)

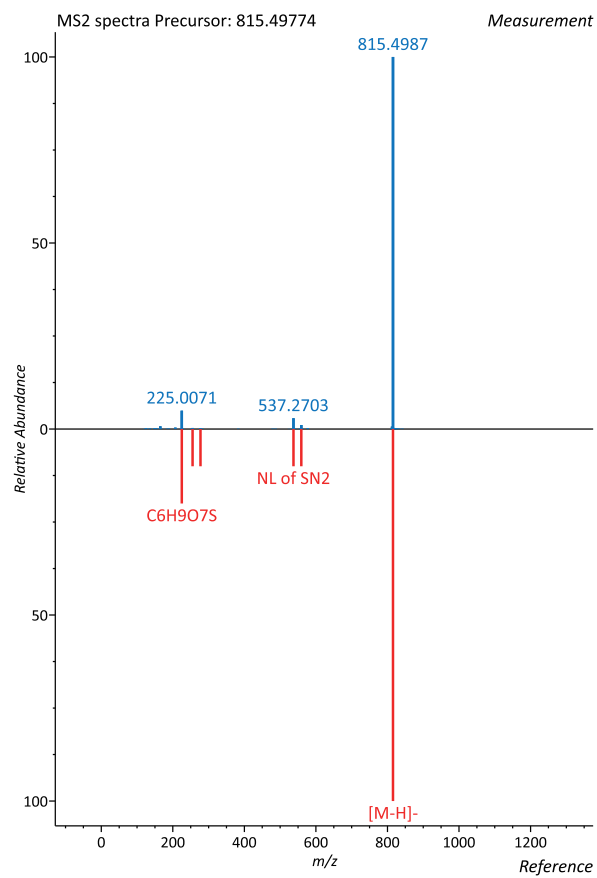

SWATH

(Q1 window, 21 Da; Accumulation time 10 ms)

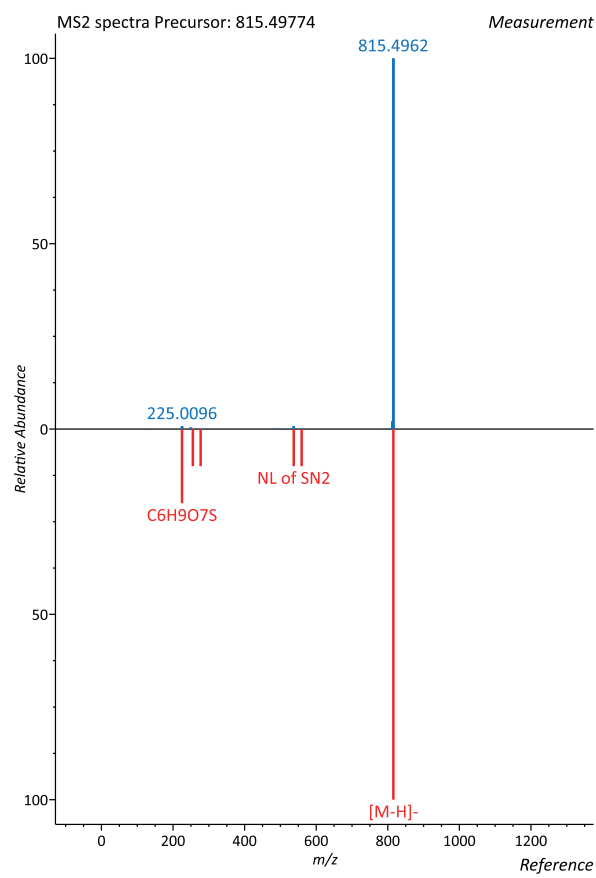

SWATH

(Q1 window, 65 Da; Accumulation time 30 ms)

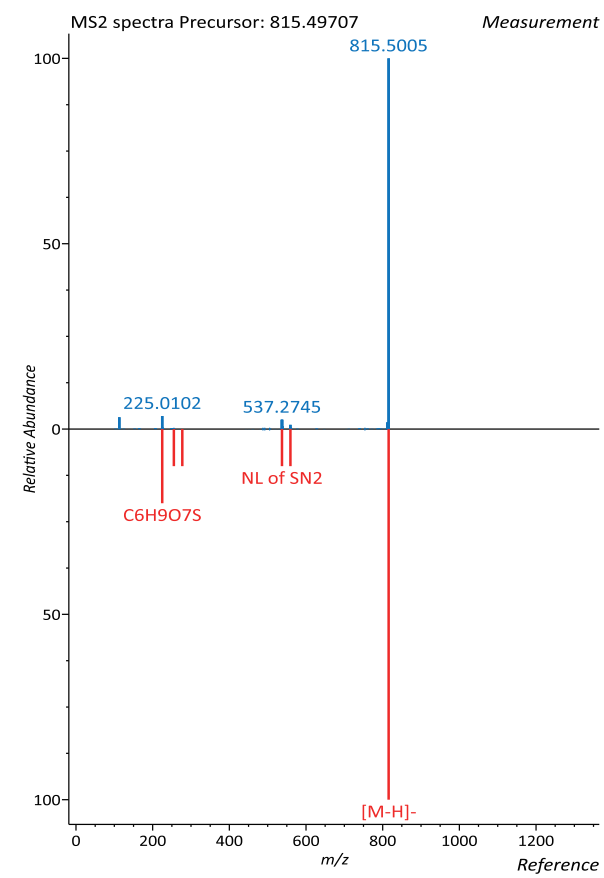

# SQDG (16:2/18:2)

DDA

(Q1 window, 1Da; Accumulation time 50 ms)

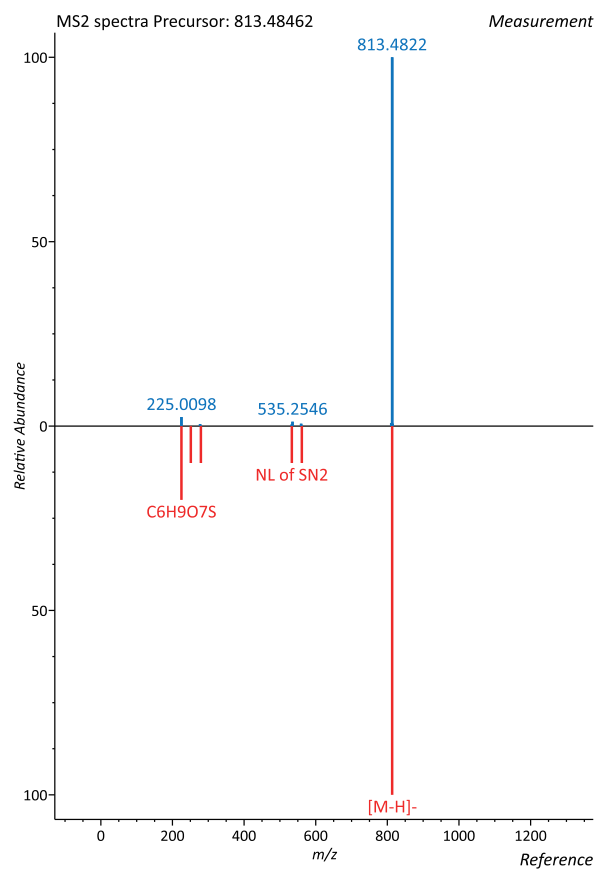

SWATH

(Q1 window, 21 Da; Accumulation time 10 ms)

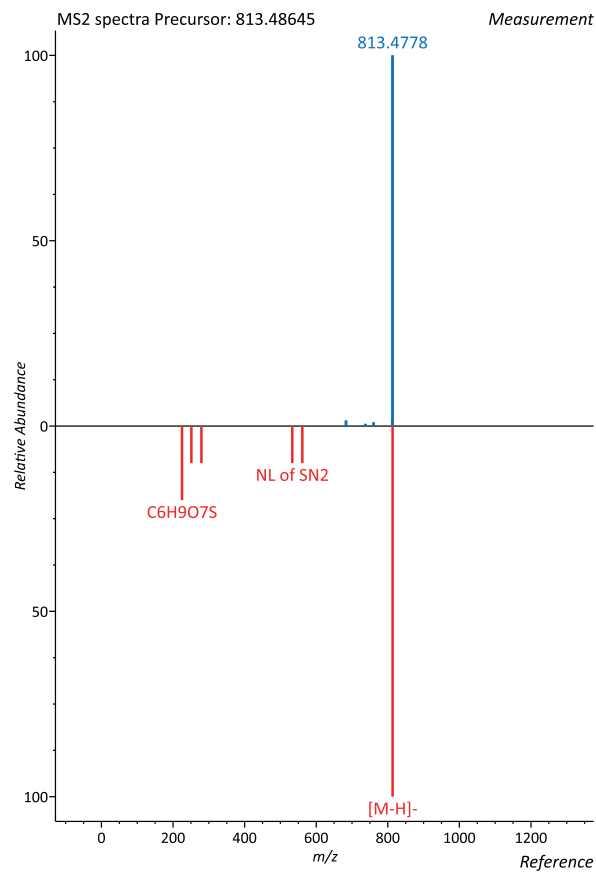

SWATH

(Q1 window, 65 Da; Accumulation time 30 ms)

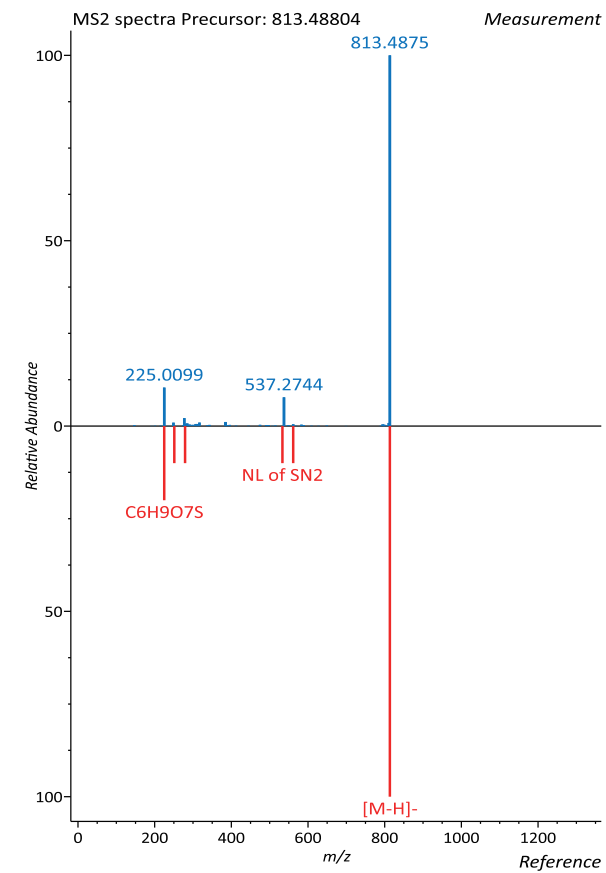



# SQDG (16:2/18:3)

DDA

(Q1 window, 1Da; Accumulation time 50 ms)

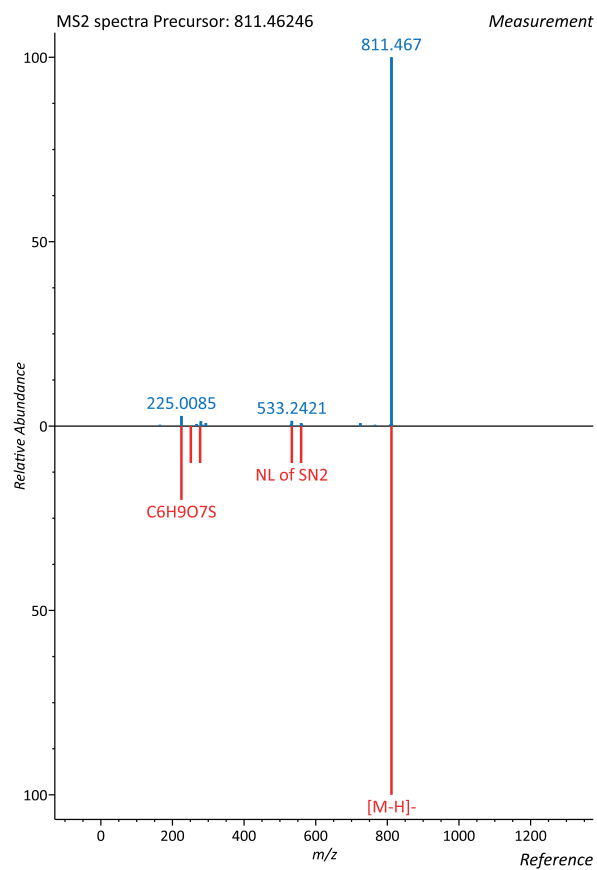

SWATH

(Q1 window, 21 Da; Accumulation time 10 ms)

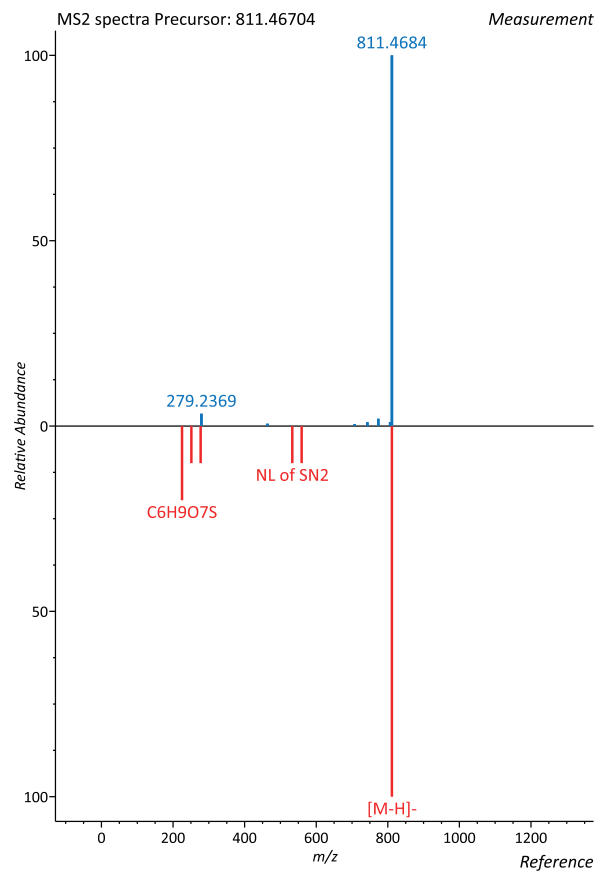

SWATH

(Q1 window, 65 Da; Accumulation time 30 ms)

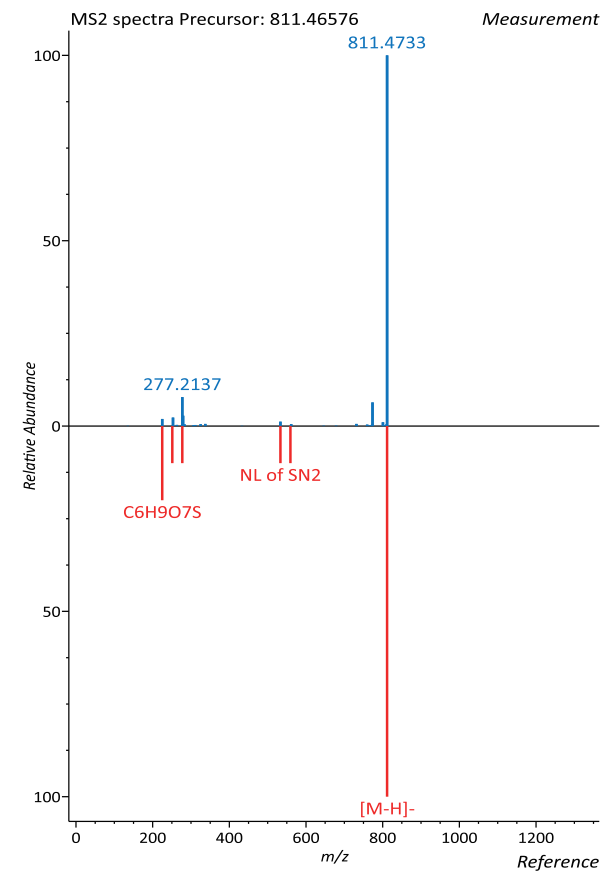

# SQDG (16:3/18:3)

DDA

(Q1 window, 1Da; Accumulation time 50 ms)

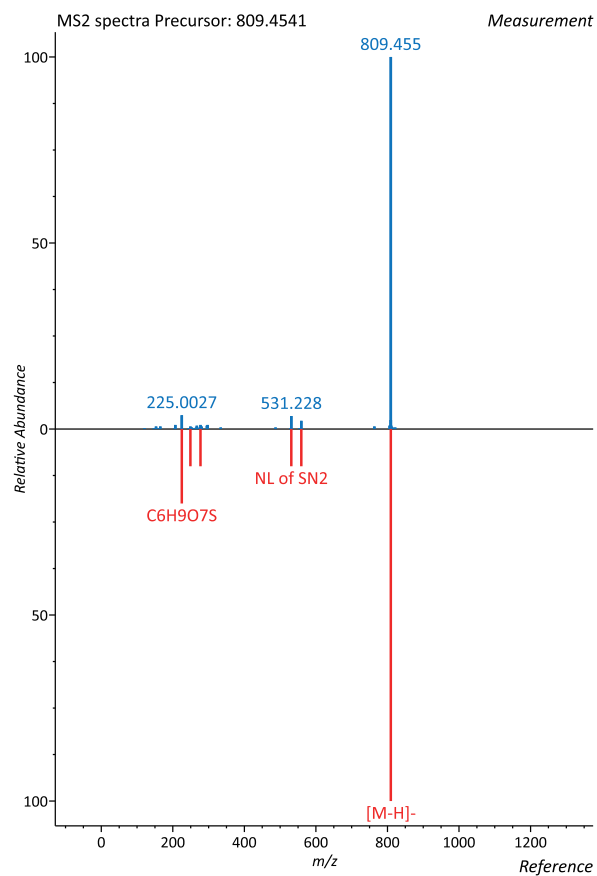

SWATH

(Q1 window, 21 Da; Accumulation time 10 ms)

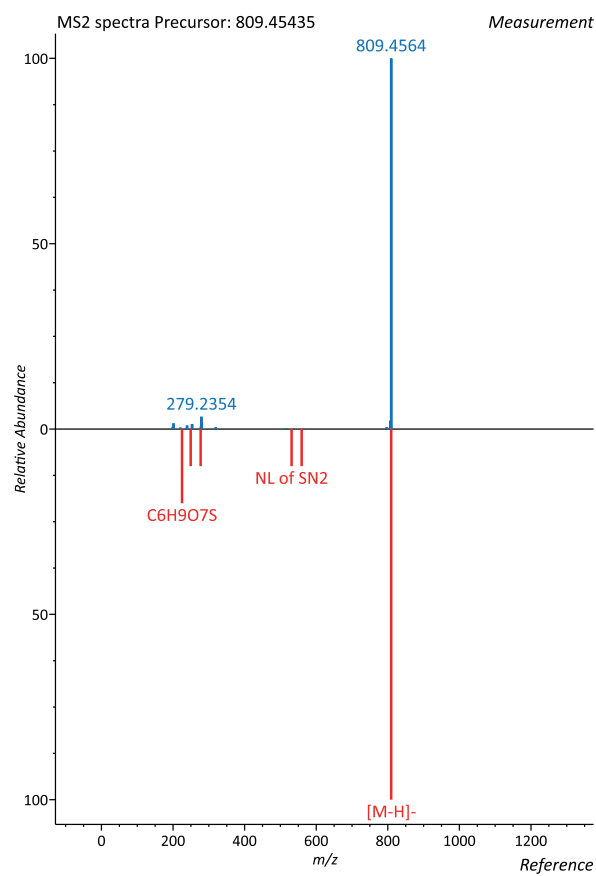

SWATH

(Q1 window, 65 Da; Accumulation time 30 ms)

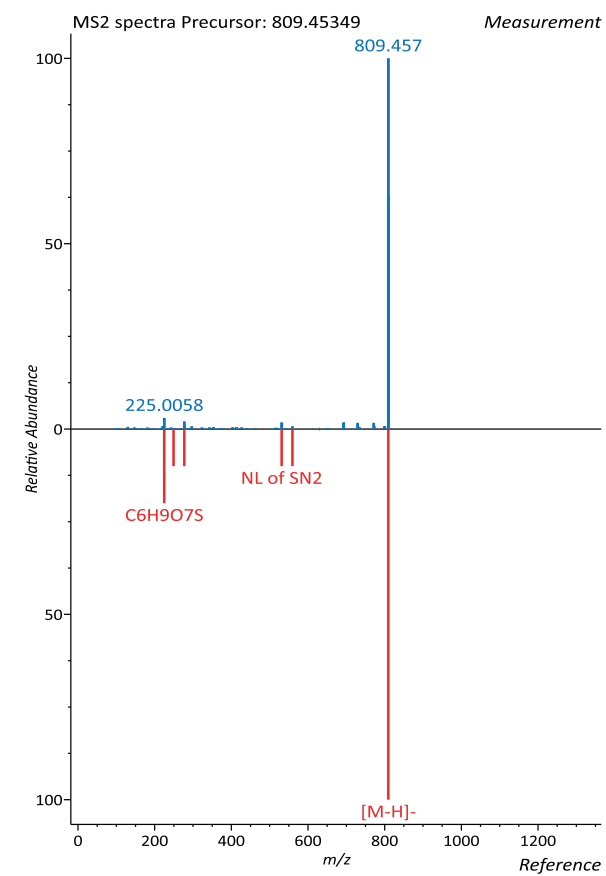

# SQDG (16:4/18:3)

DDA

(Q1 window, 1Da; Accumulation time 50 ms)

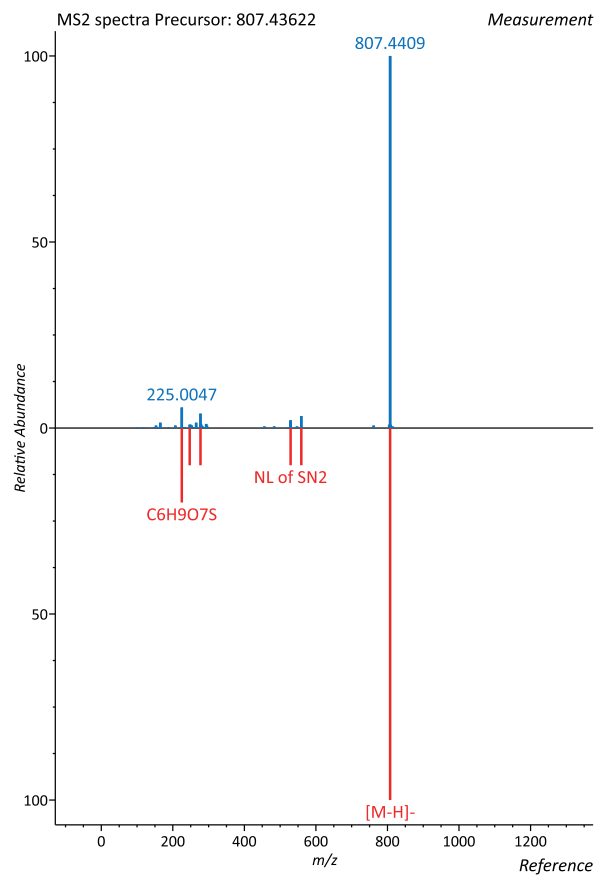

SWATH

(Q1 window, 21 Da; Accumulation time 10 ms)

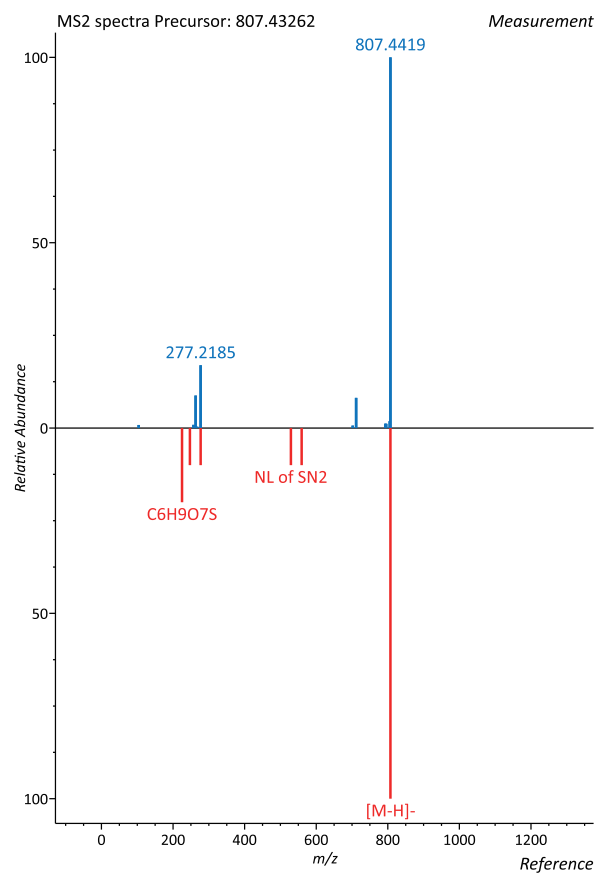

SWATH

(Q1 window, 65 Da; Accumulation time 30 ms)

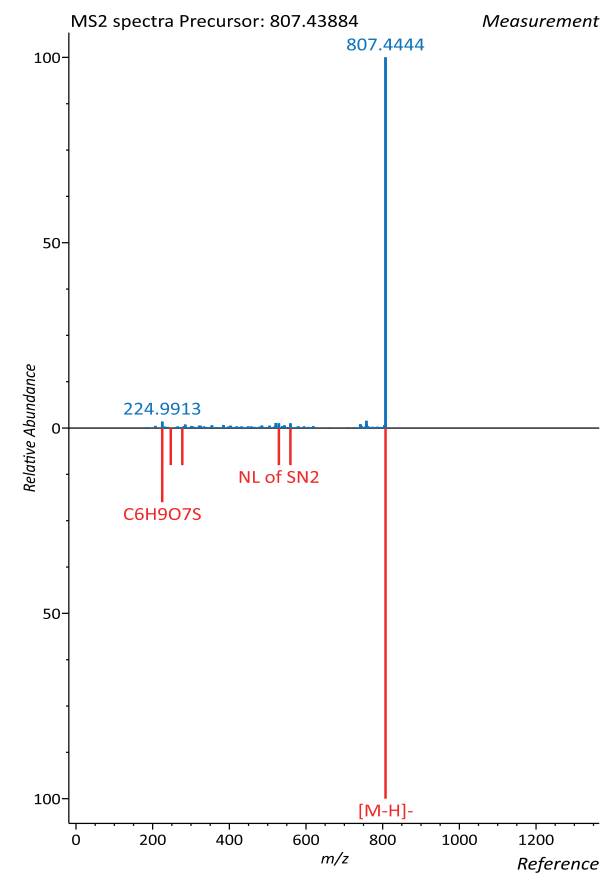

# SQDG (18:3/18:3)

DDA

(Q1 window, 1Da; Accumulation time 50 ms)

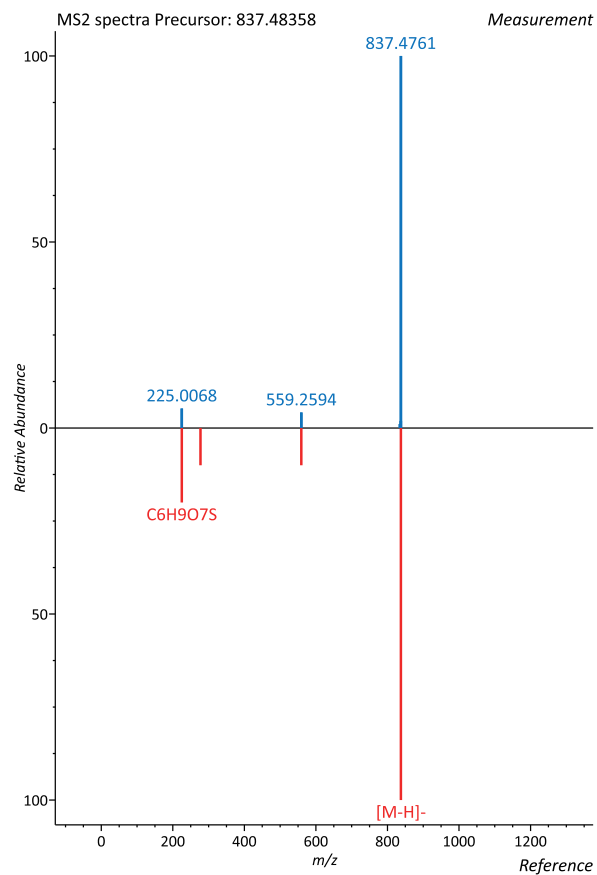

SWATH

(Q1 window, 21 Da; Accumulation time 10 ms)

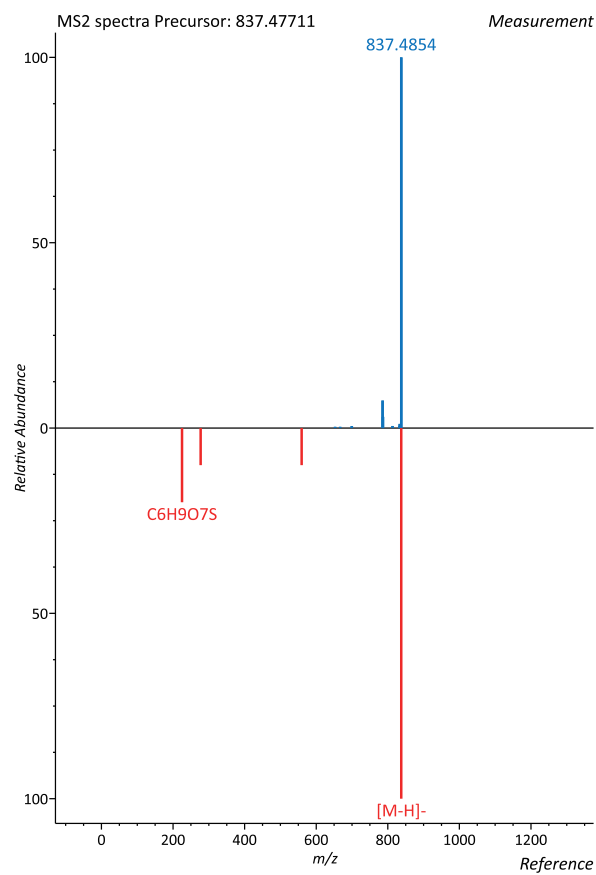

SWATH

(Q1 window, 65 Da; Accumulation time 30 ms)

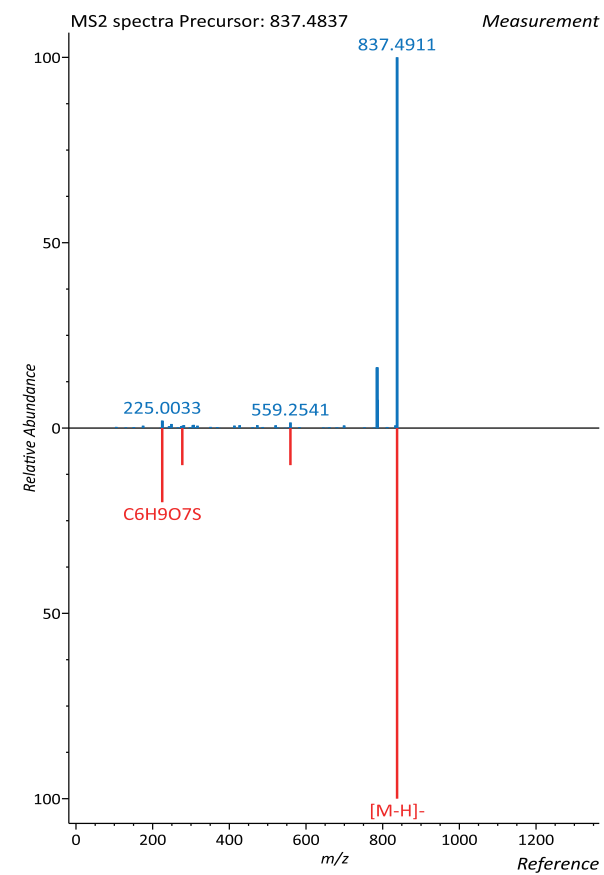

## Histogram of spectra similarity (Negative/Identified peaks)

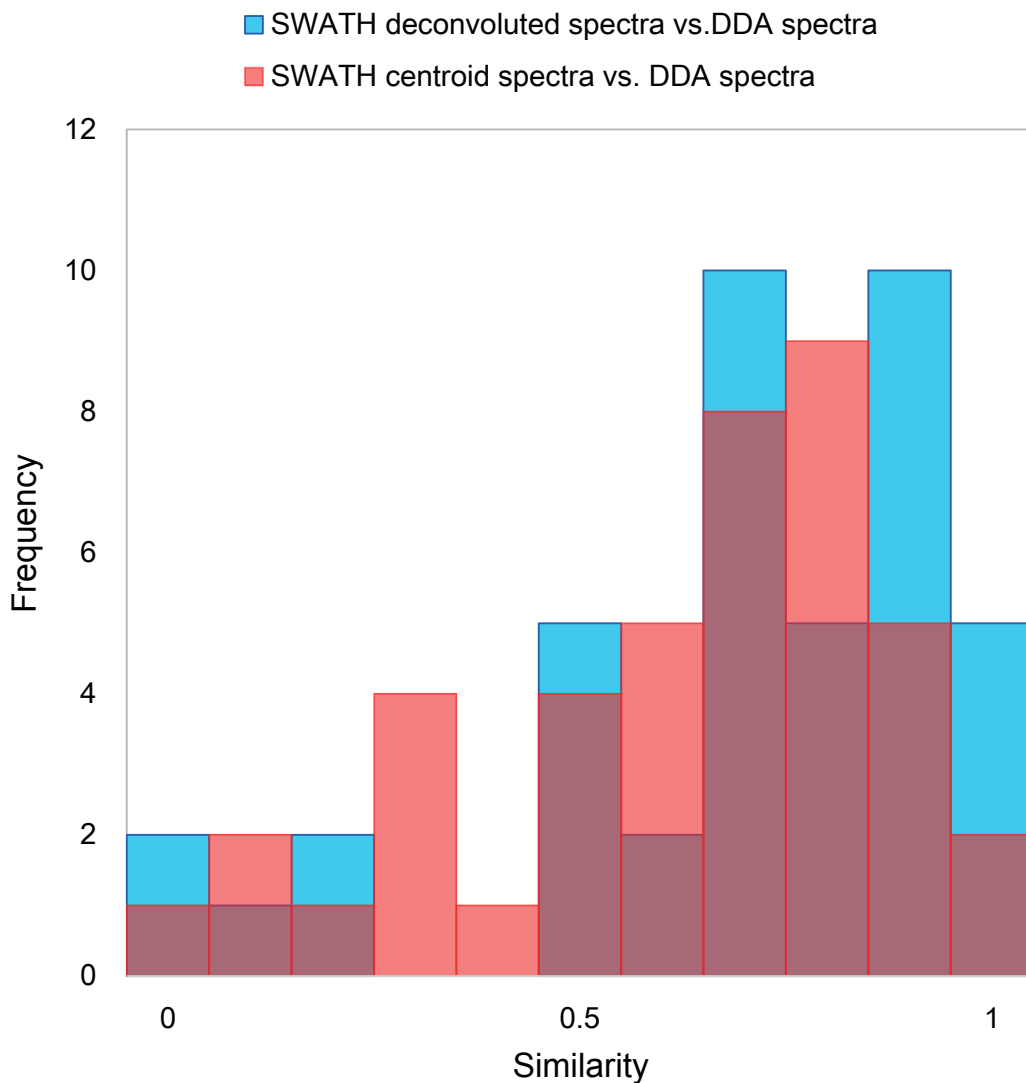

**Supplementary Fig. 3. Comparison of mass spectra with respect to commonly identified lipids between SWATH and DDA methods.** The 65-Da isolation window at 30 ms accumulation time was used for the SWATH acquisition. The blue histogram shows the spectra similarity between the deconvoluted spectra and DDA spectra. The red histogram shows the spectra similarity between the centroid spectra of non-deconvoluted spectra and DDA spectra. The dot product score is mostly greater than 0.7 even if the wider precursor window (65-Da) is used.

**Supplementary Fig. 4. Lipid amounts of each lipid class in algal species.** The X- and Y-axis show the lipid class names and the total peak heights of identified lipids. The results of SWATH-MS positive ion mode, SWATH-MS negative ion mode, DDA positive ion mode, and DDA negative ion mode are described in the respective pages.

# SWATH-MS Positive ion mode

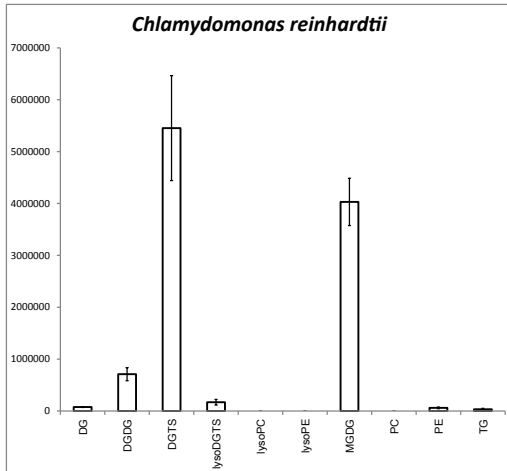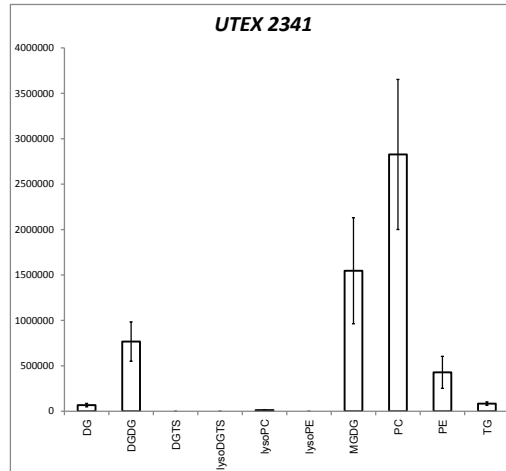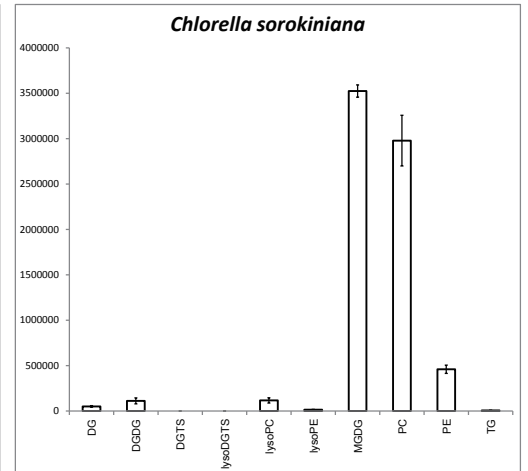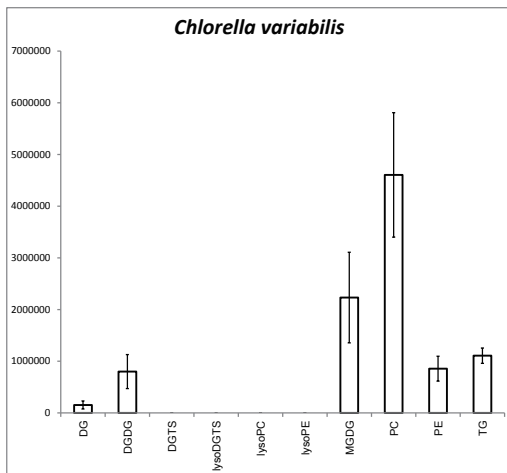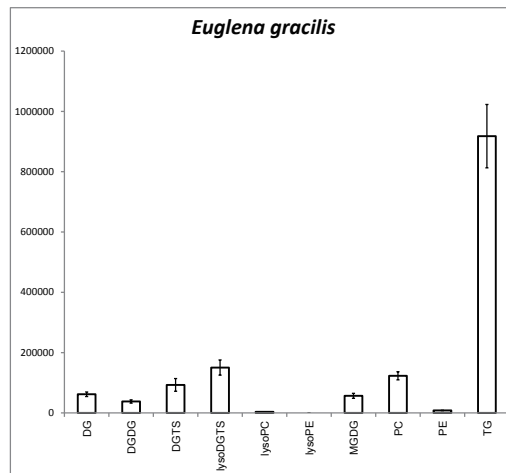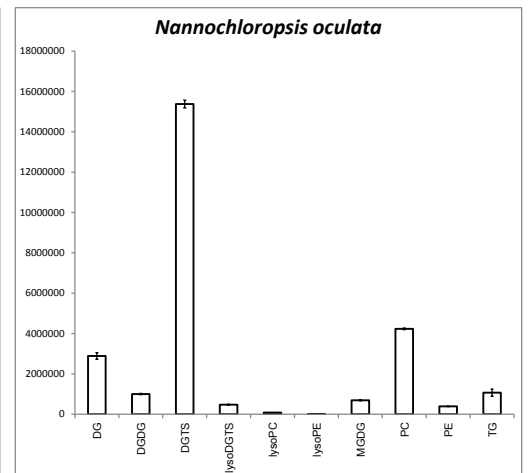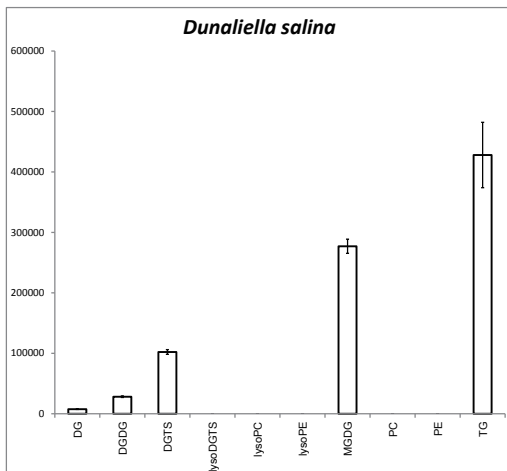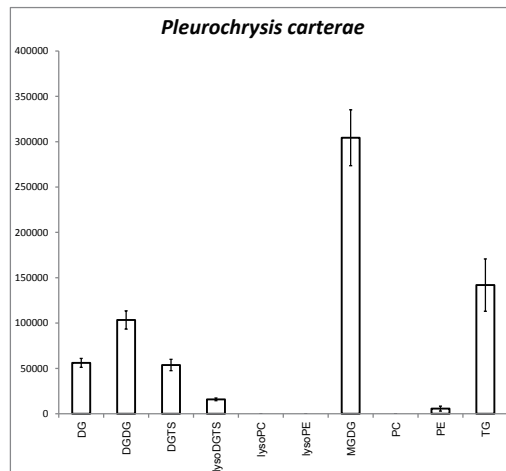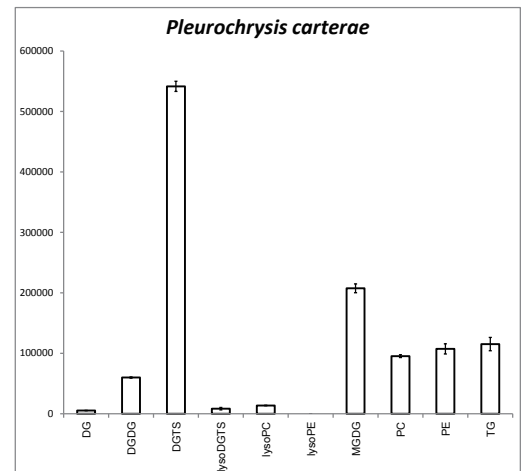

# SWATH-MS Negative ion mode

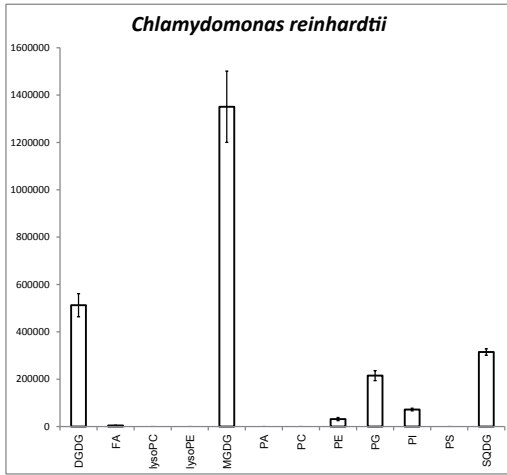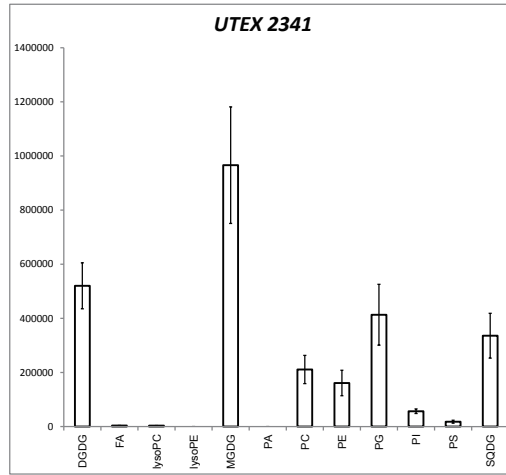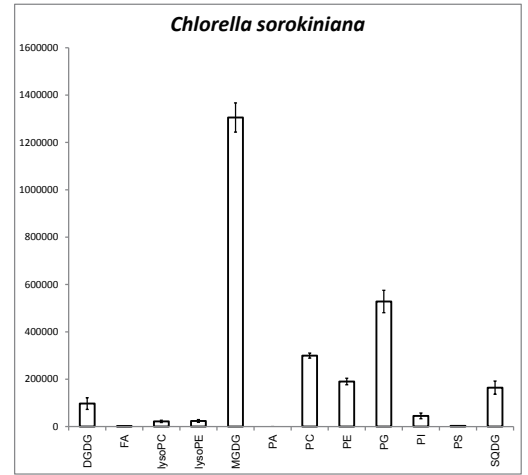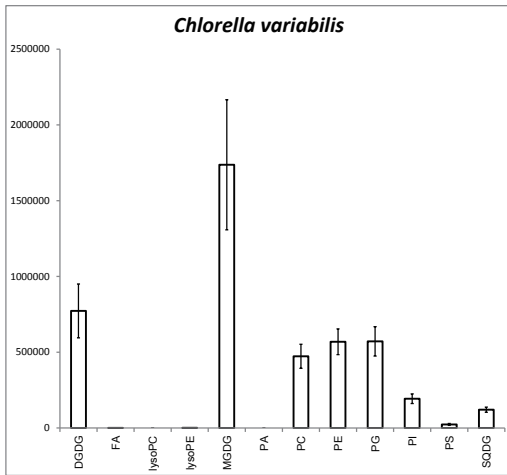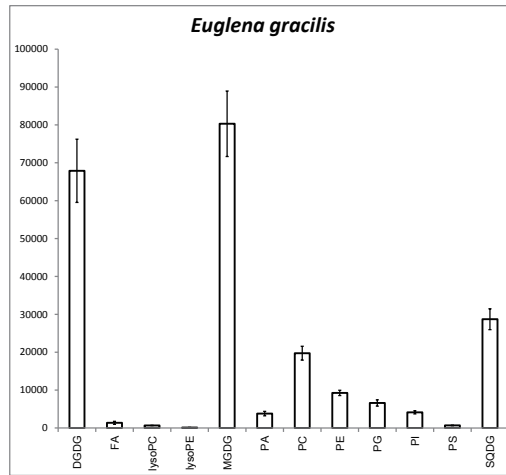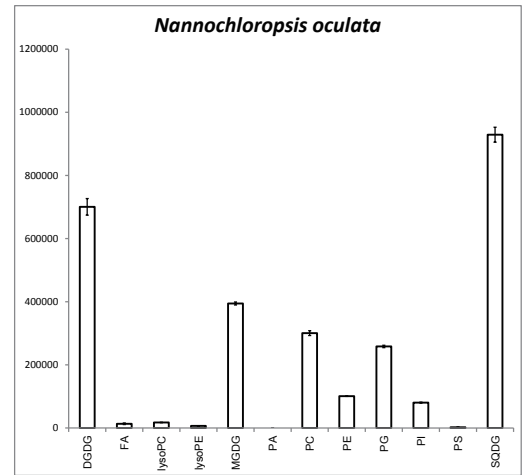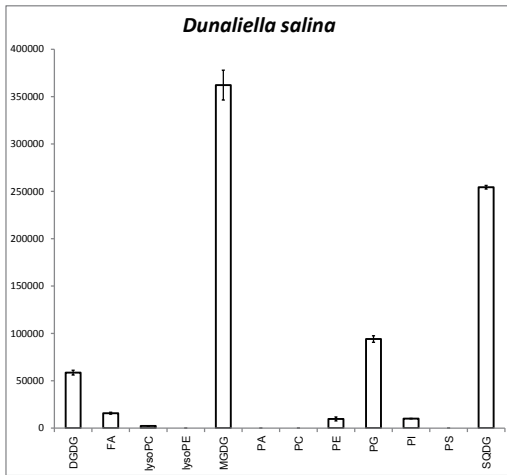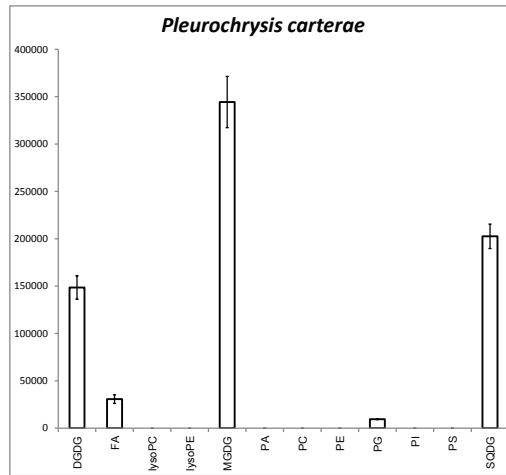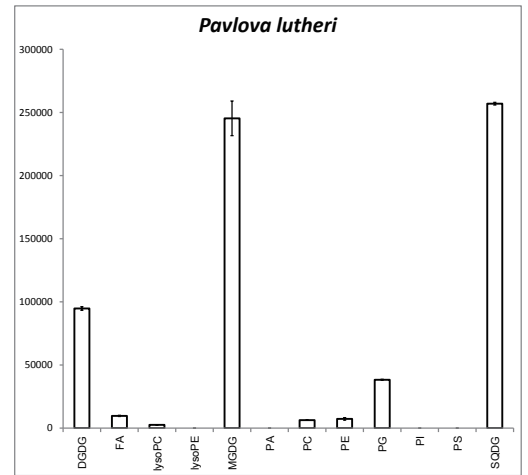



# DDA Positive ion mode

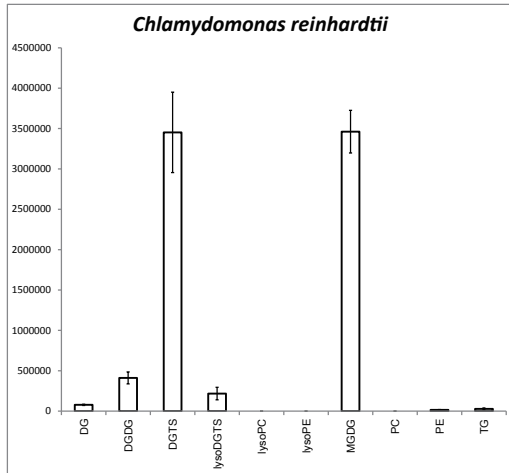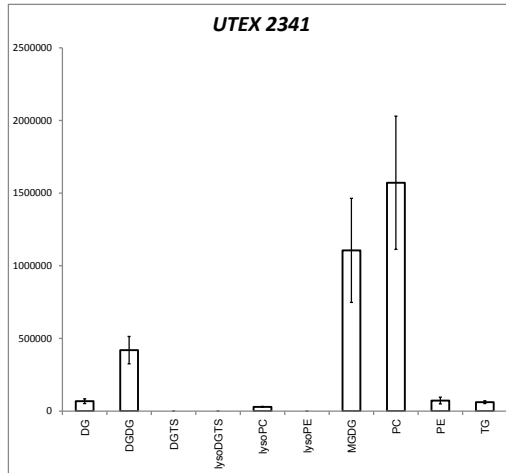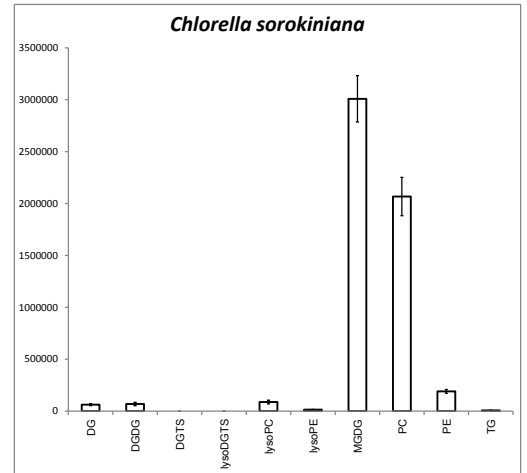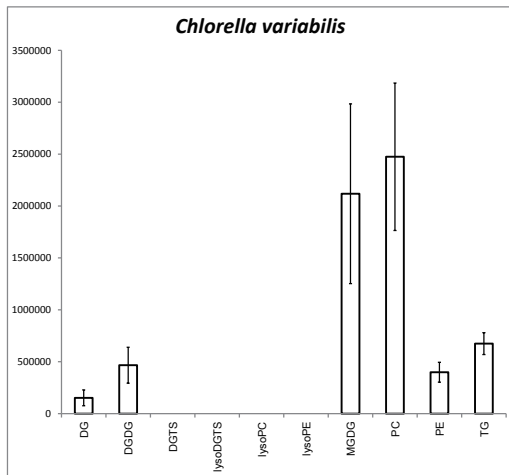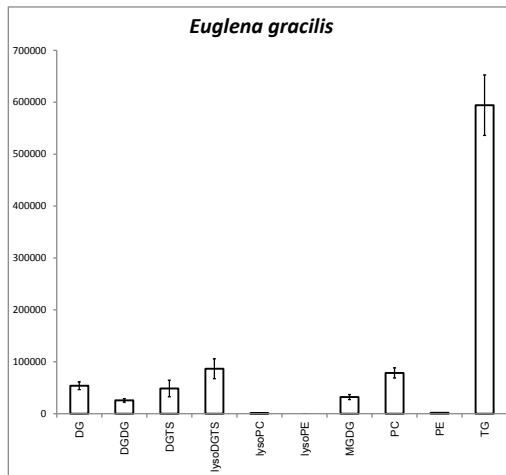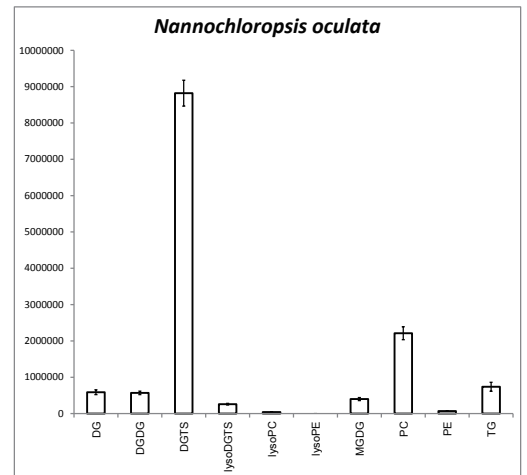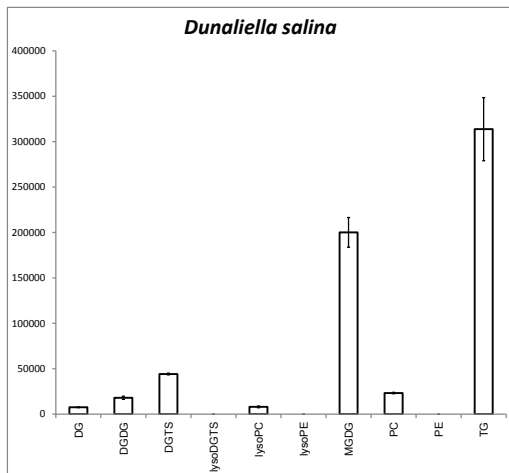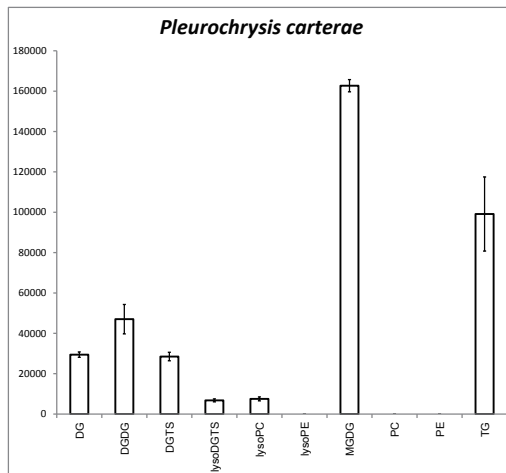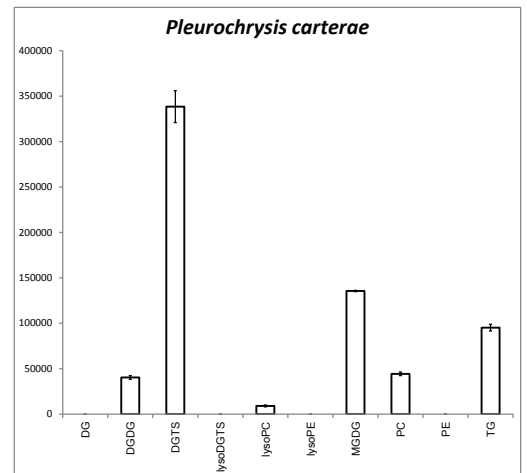

# DDA Negative ion mode

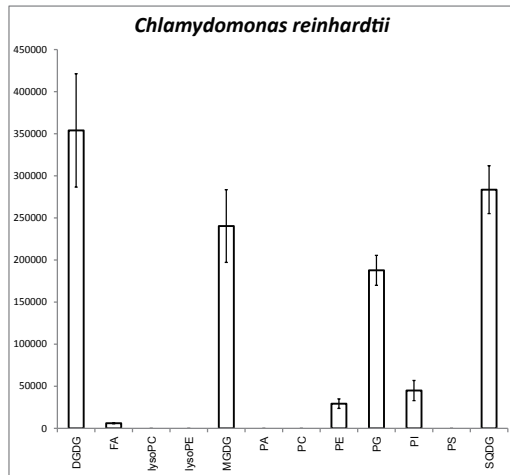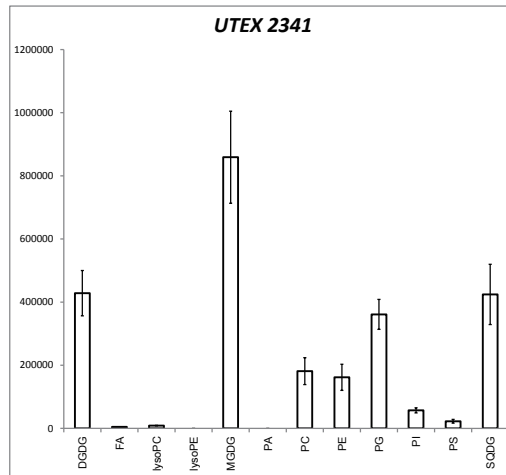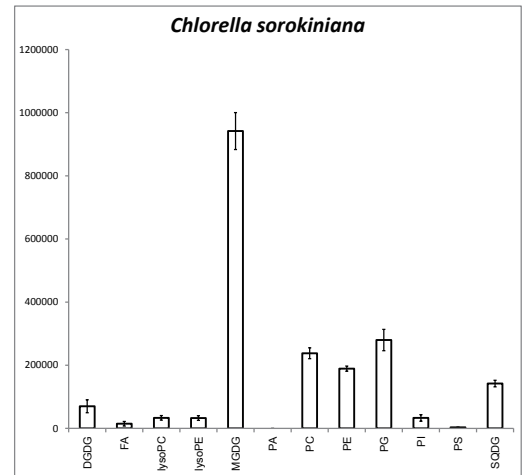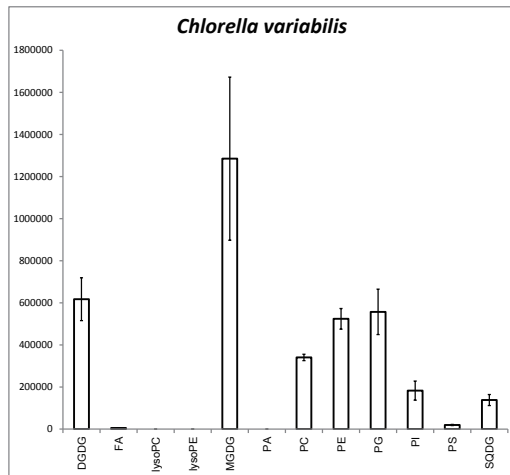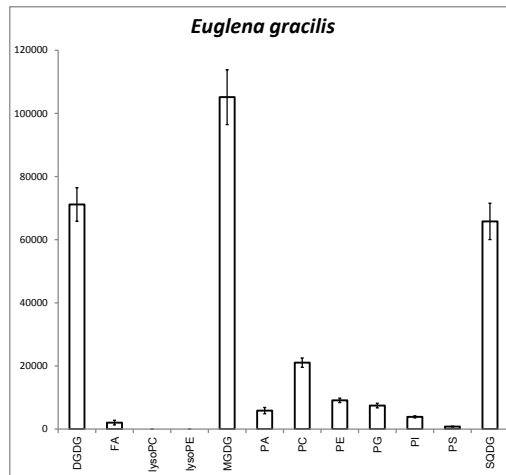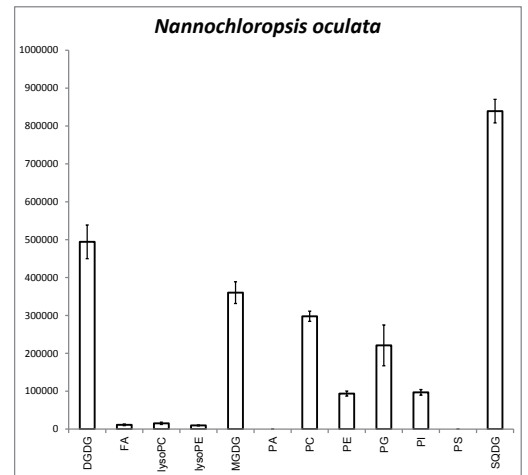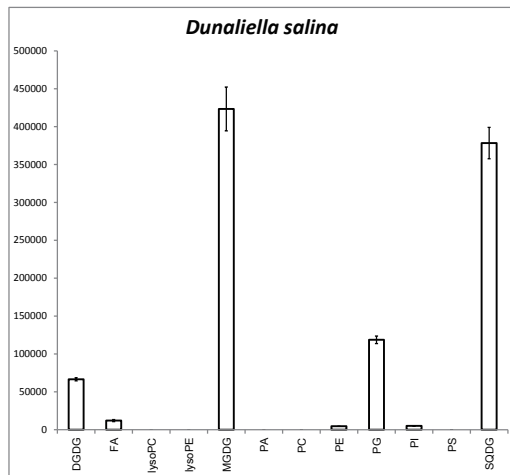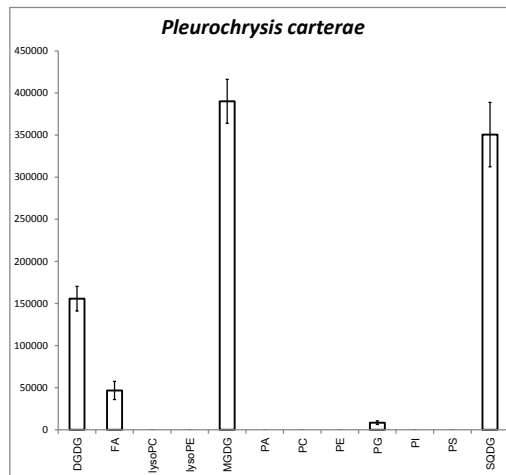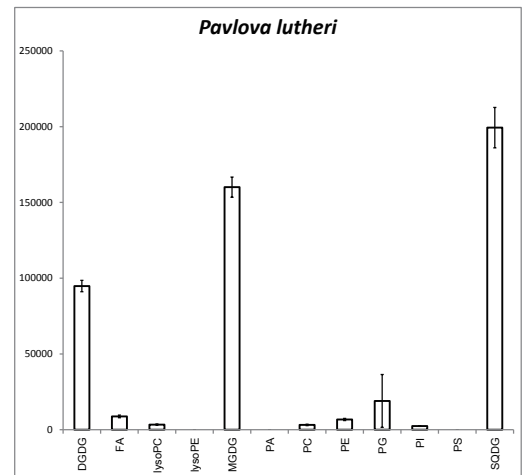

**Supplementary Fig. 5. Comparison of lipid properties in each algal species.** The X- and Y-axis show the algae names and the total peak heights of identified lipids. The results of SWATH-MS positive ion mode, SWATH-MS negative ion mode, DDA positive ion mode, and DDA negative ion mode are described in the respective pages.

# SWATH-MS Positive ion mode

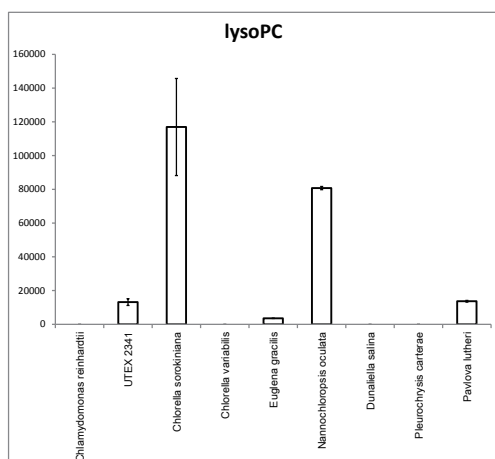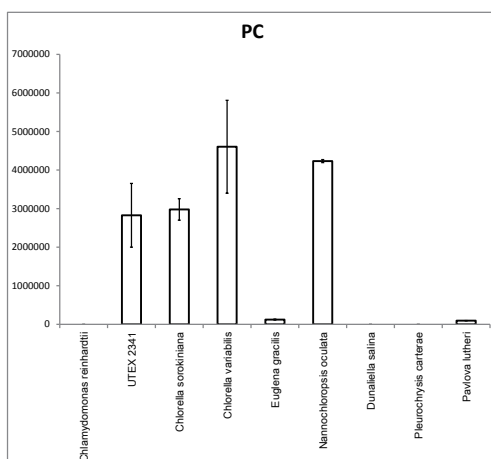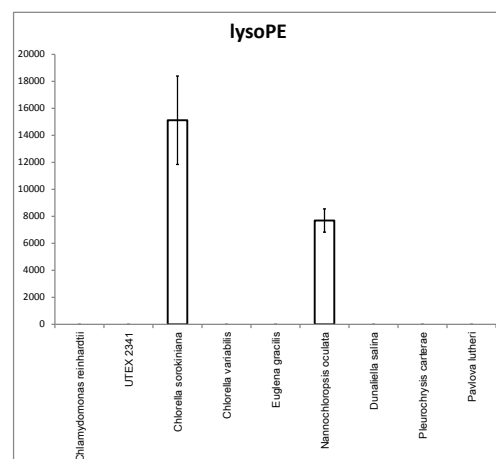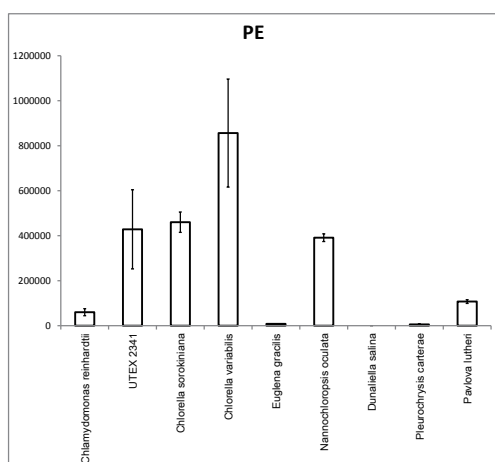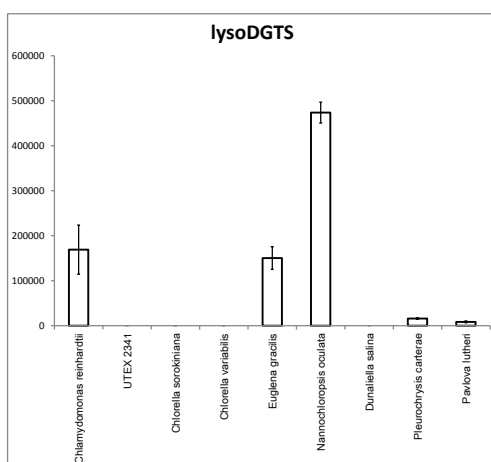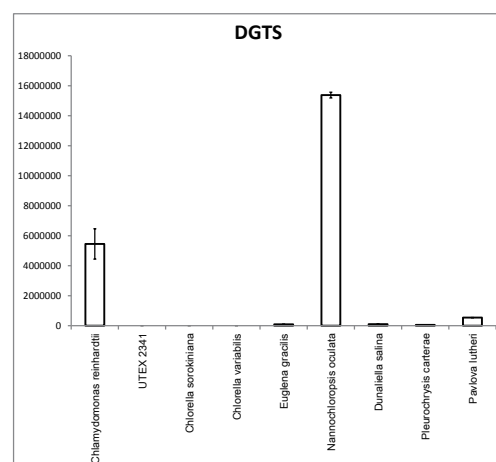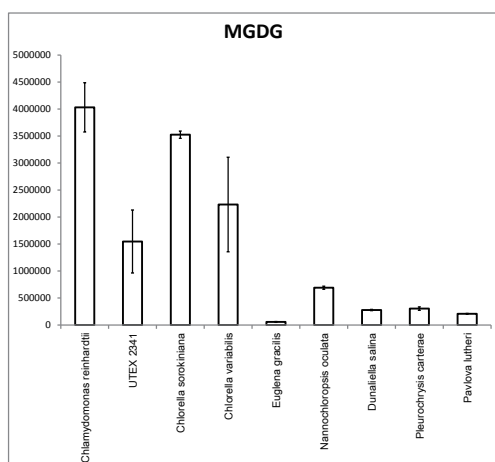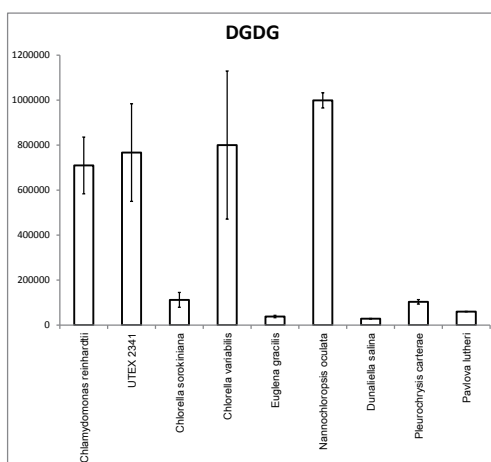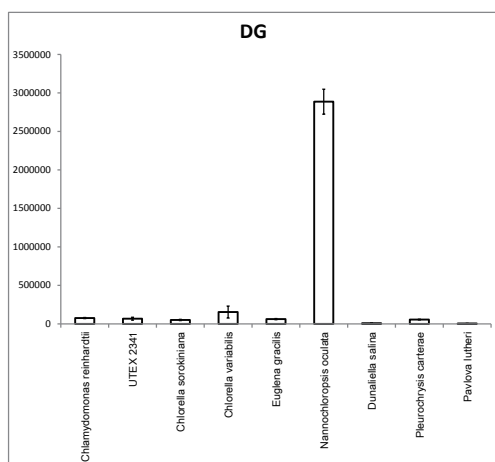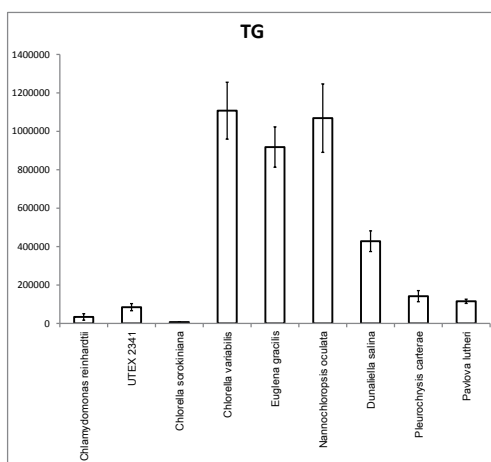

# SWATH-MS Negative ion mode

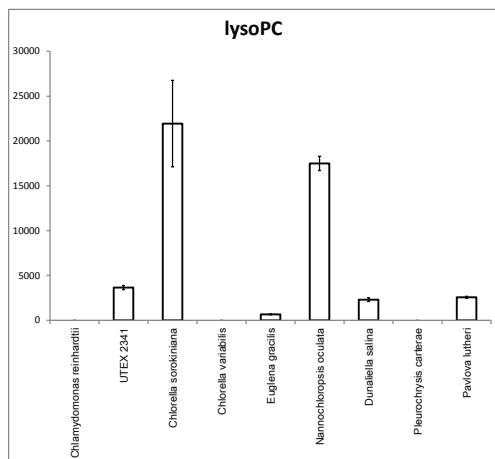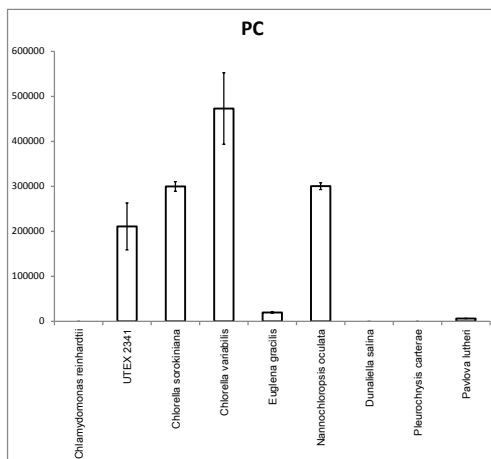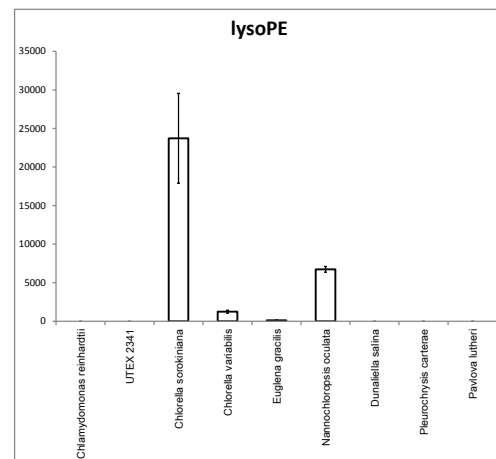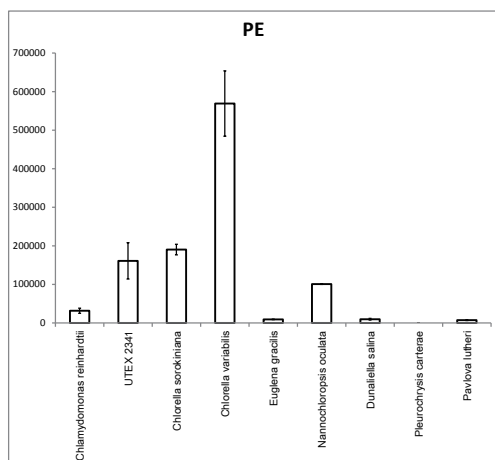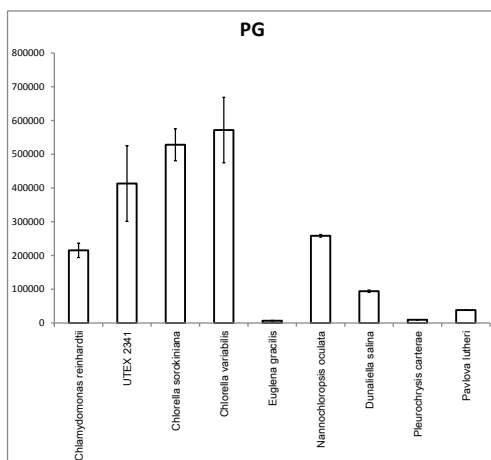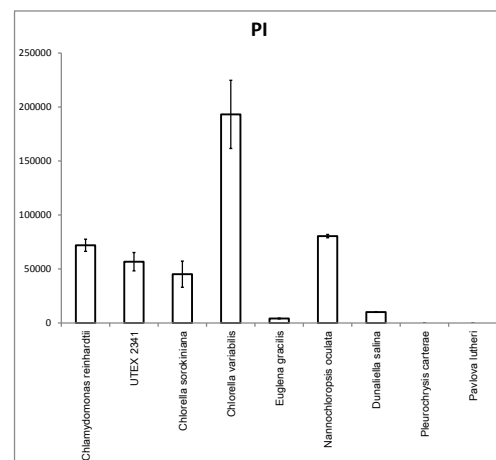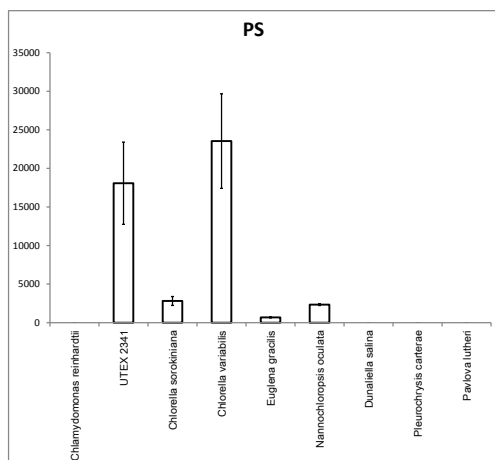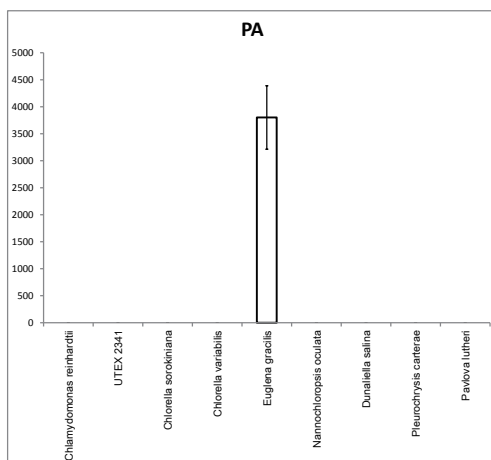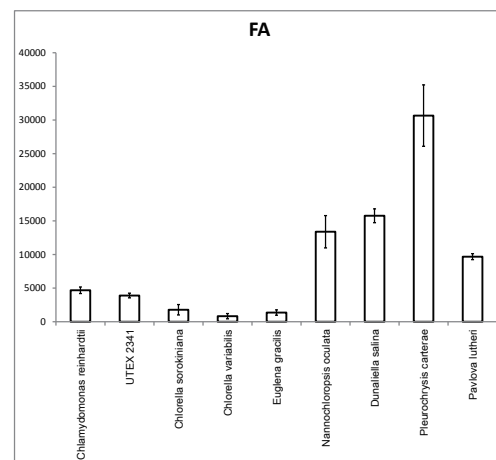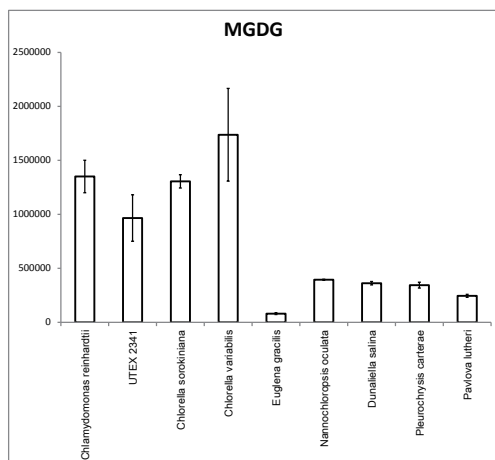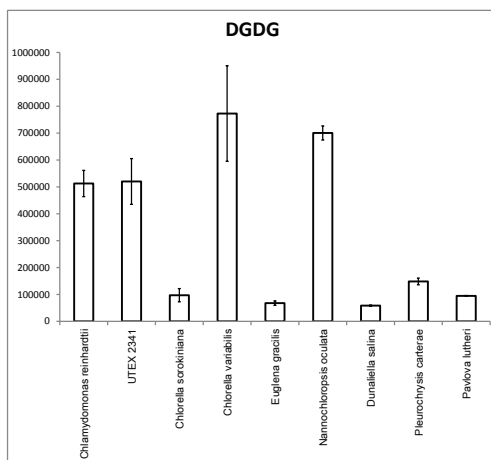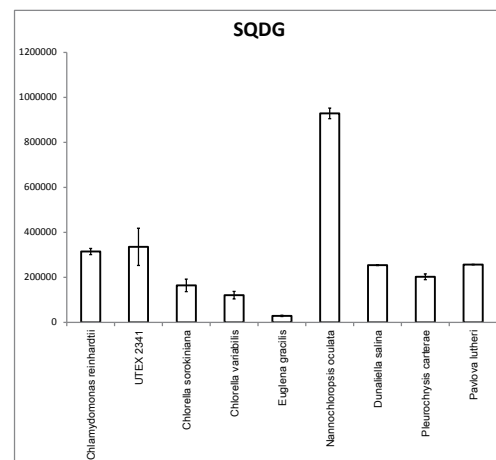

# DDA Positive ion mode

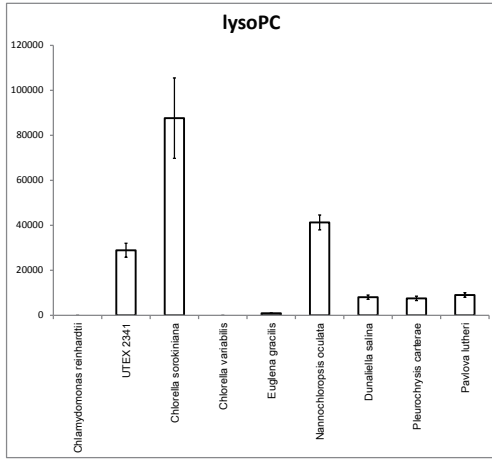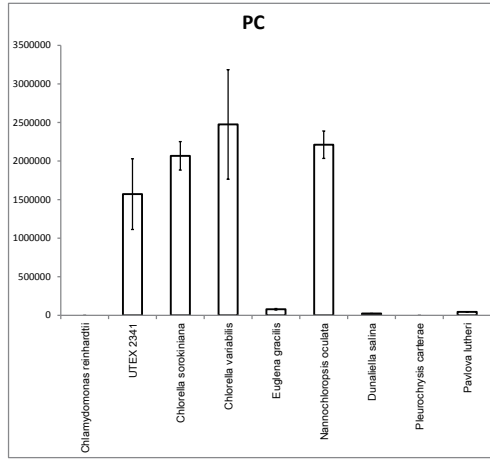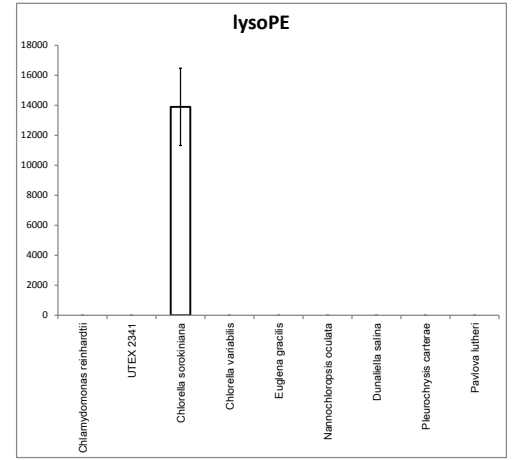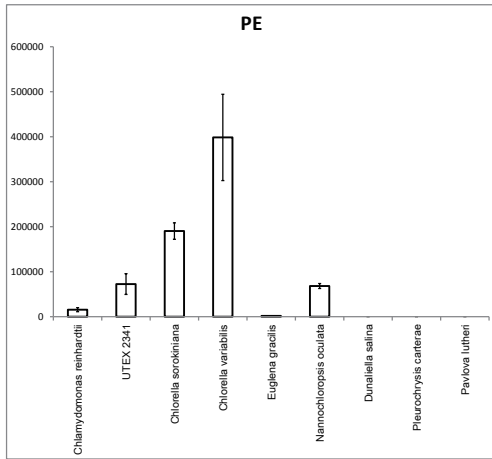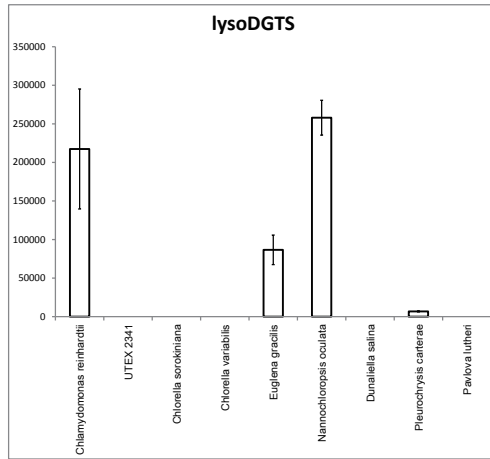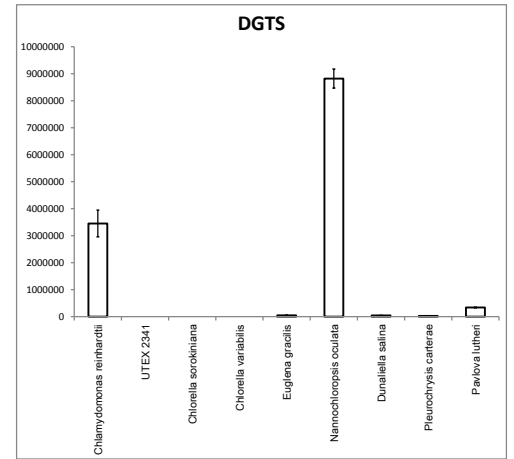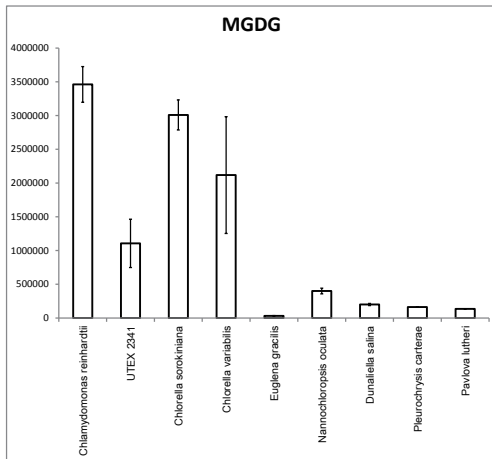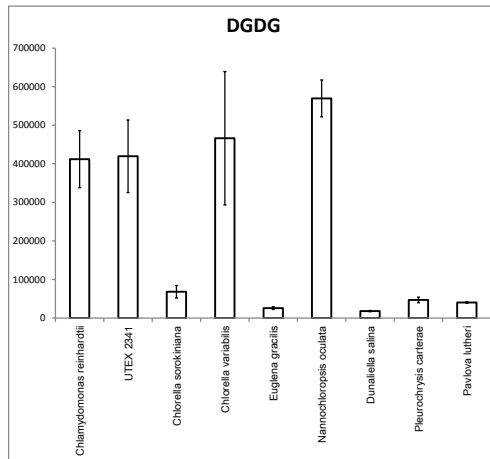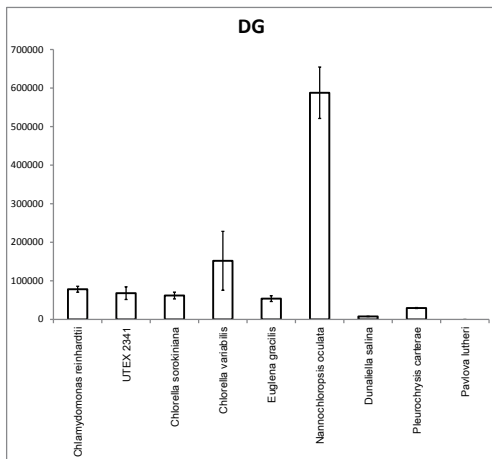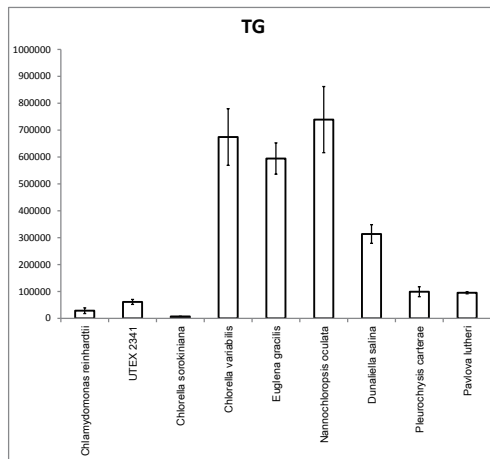

# DDA Negative ion mode

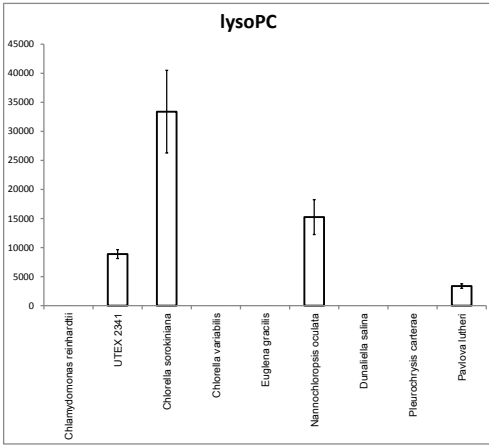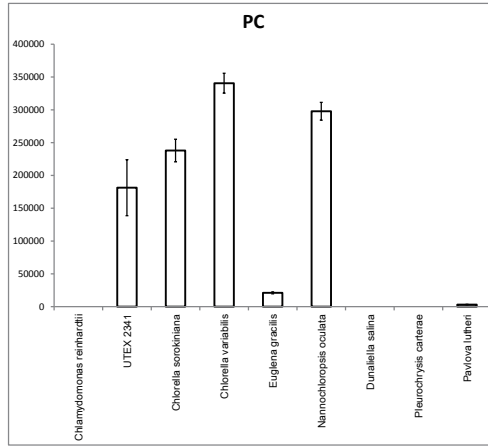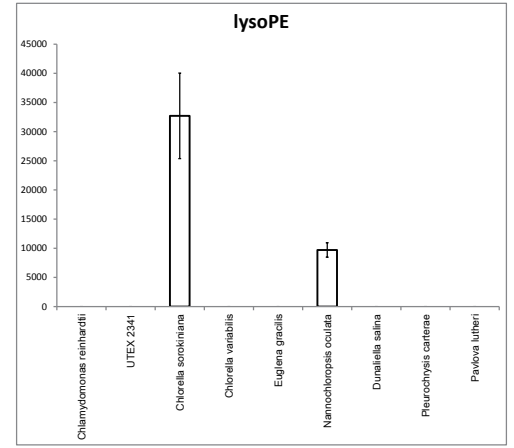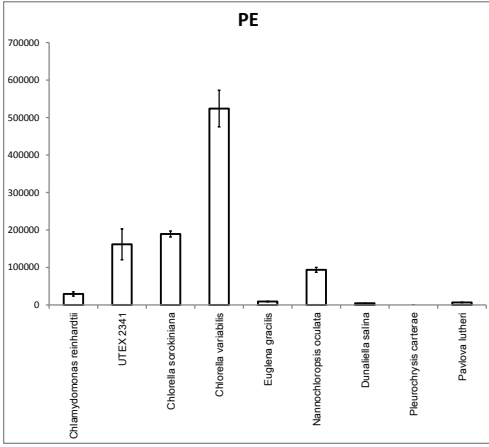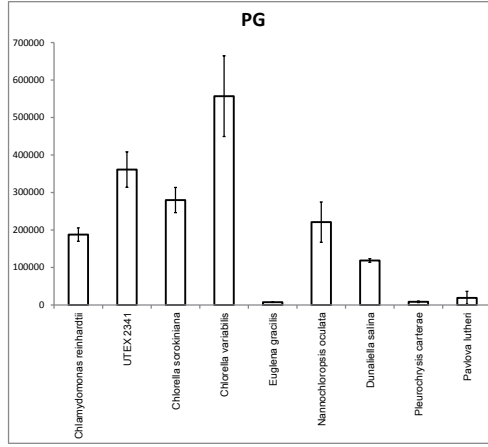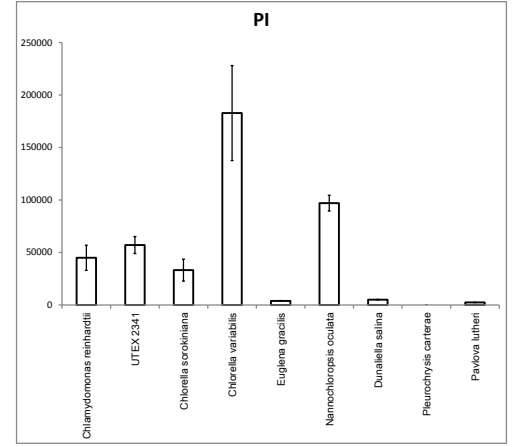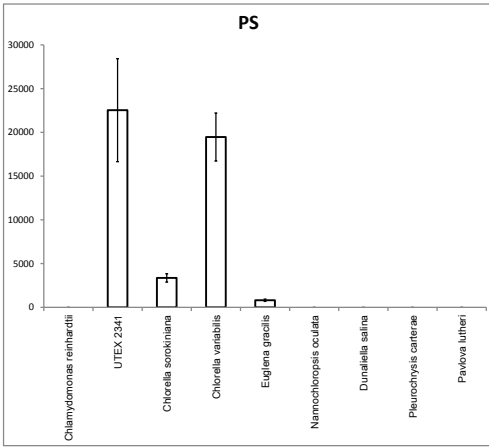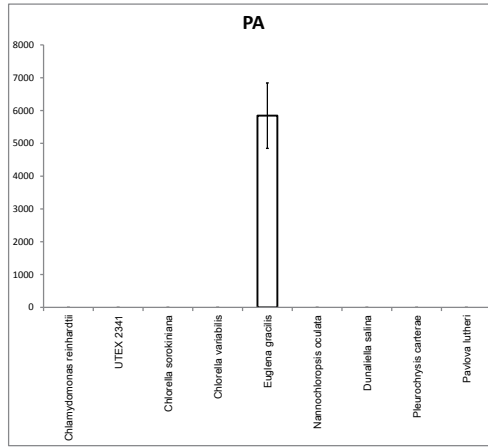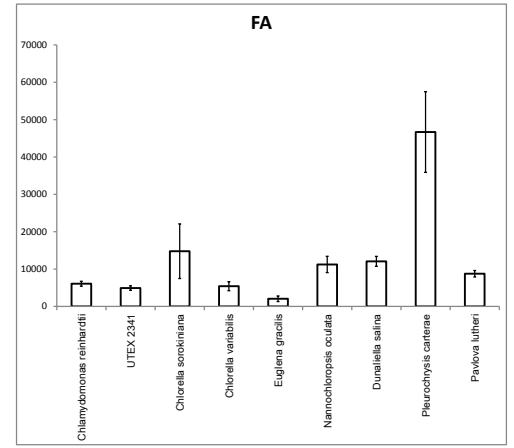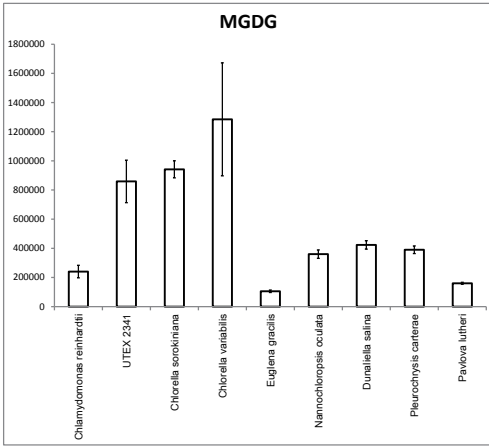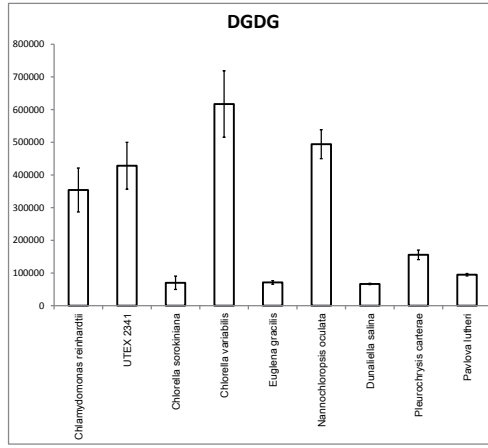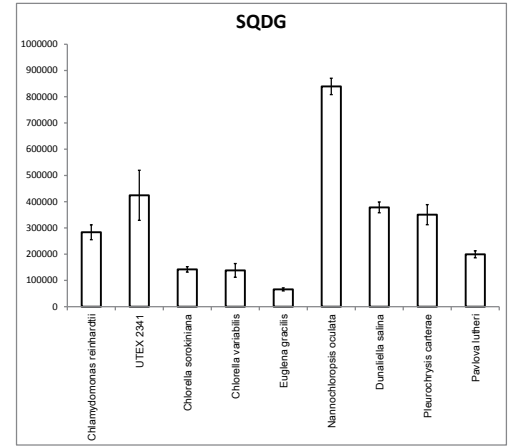

**Supplementary Fig. 6. Examples of lipid compounds that had little or not been reported previously.** Each panel shows the screenshot of MS-DIAL software. The retention time, mass accuracy, isotopic ratio, and MS/MS spectrum are confirmed for the lipid identifications.



## Odd chain lipid: *Chlamydomonas reinhardtii* DGTS (16:0/17:1)

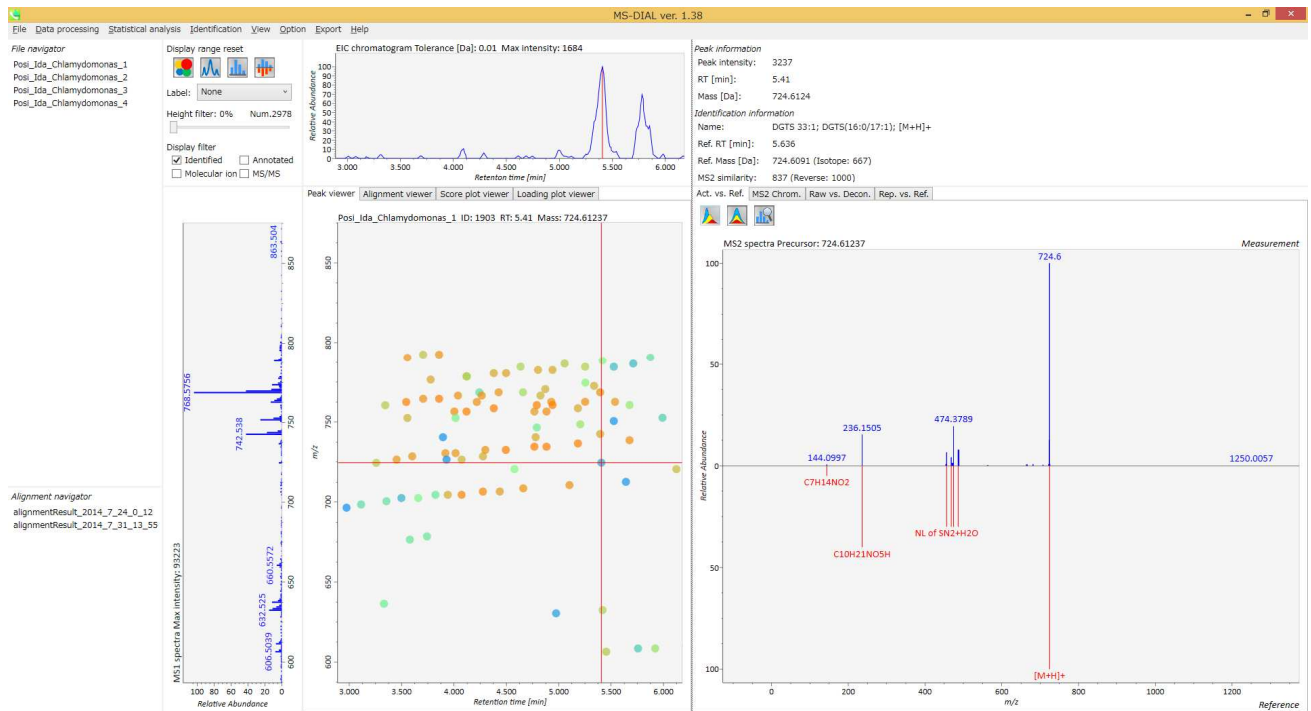

## Odd chain lipid: *Chlamydomonas reinhardtii* DGTS (19:1/18:3)

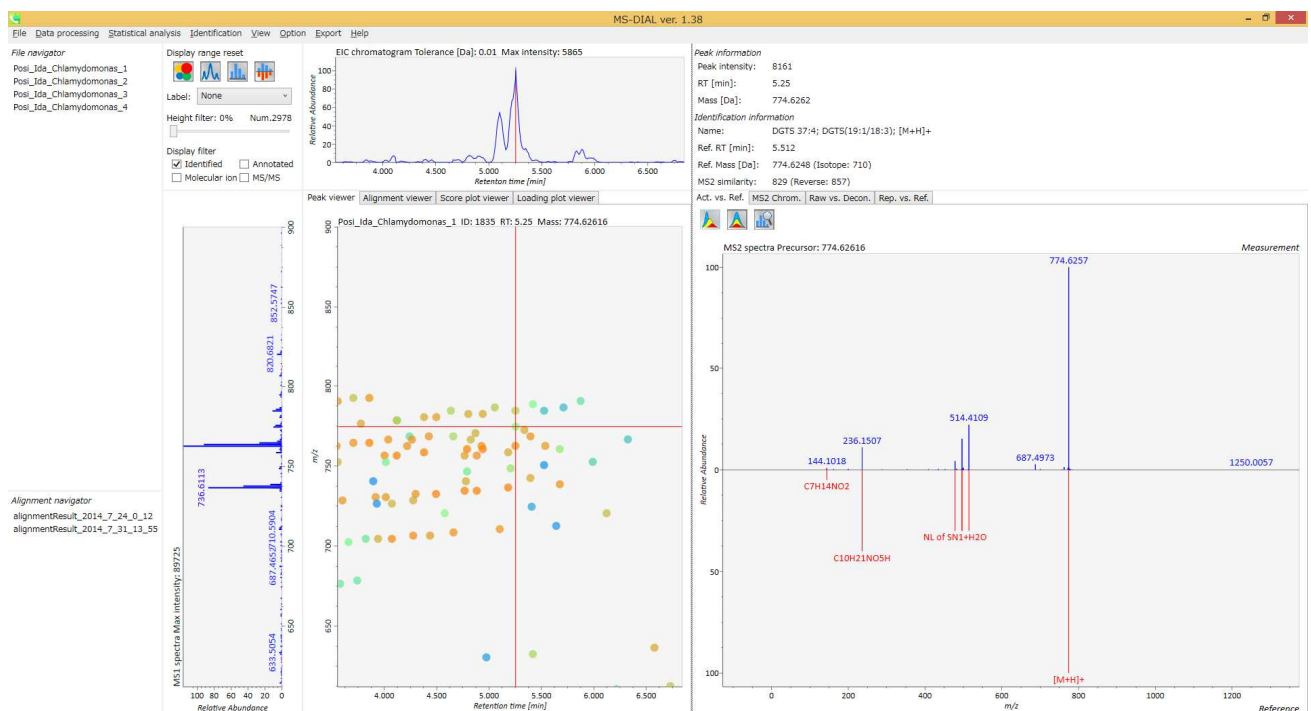

## Odd chain lipid: *Chlorella minutissima* MGDG(17:2/18:3)

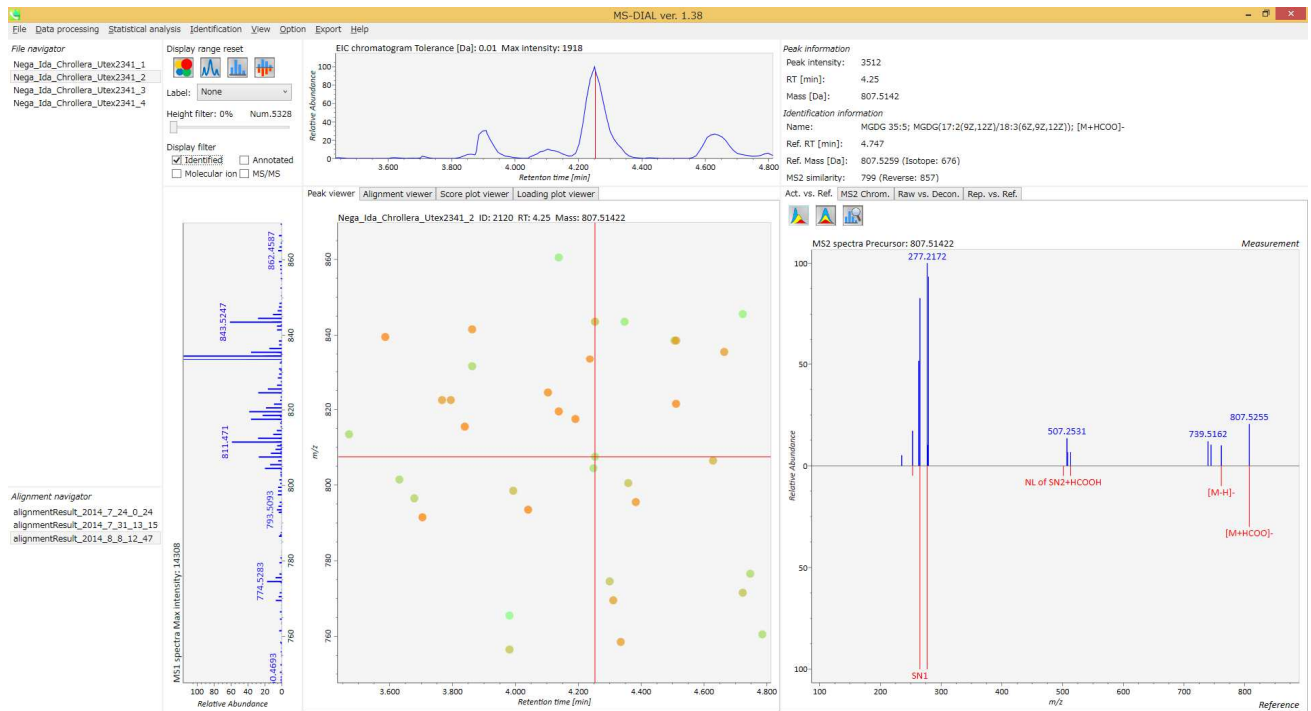

## Odd chain lipid: *Chlorella minutissima* SQDG (15:0/18:3)

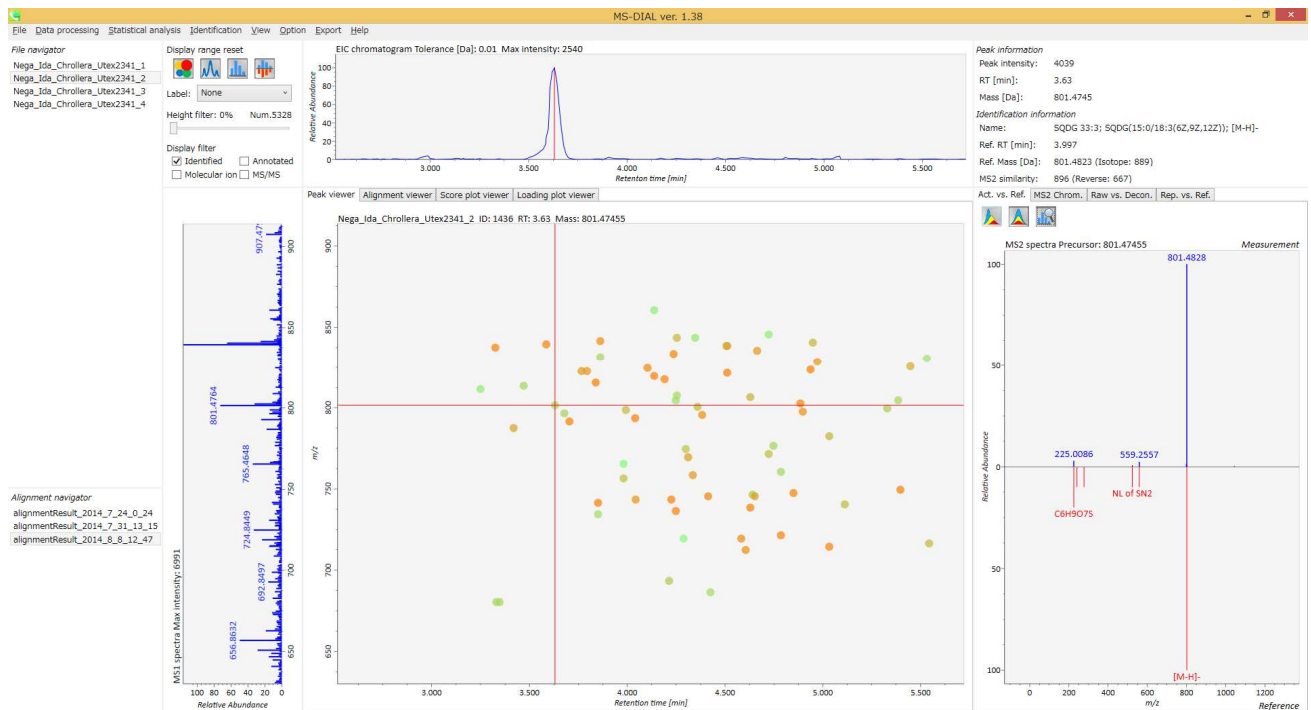

## Odd chain lipid: *Chrollera sorokiniana* MGDG(16:2/17:1)

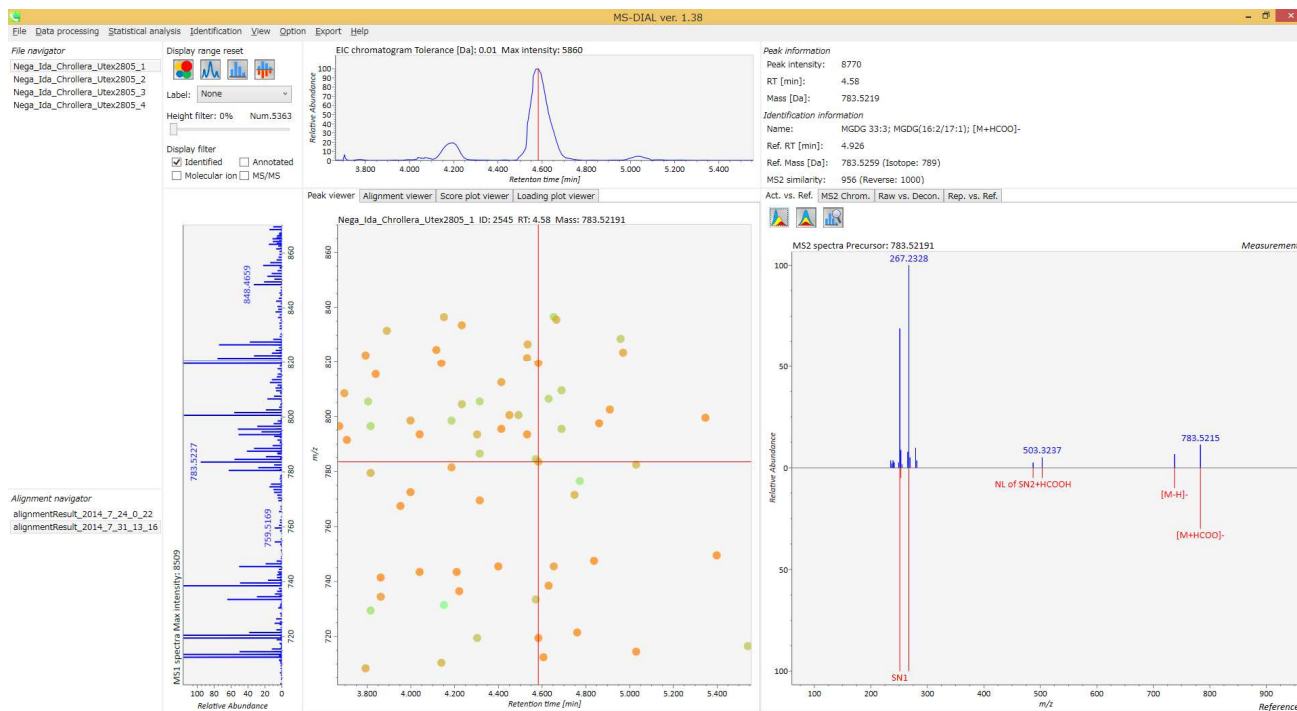

## Odd chain lipid: *Chrollera sorokiniana* PC(16:3/17:3)

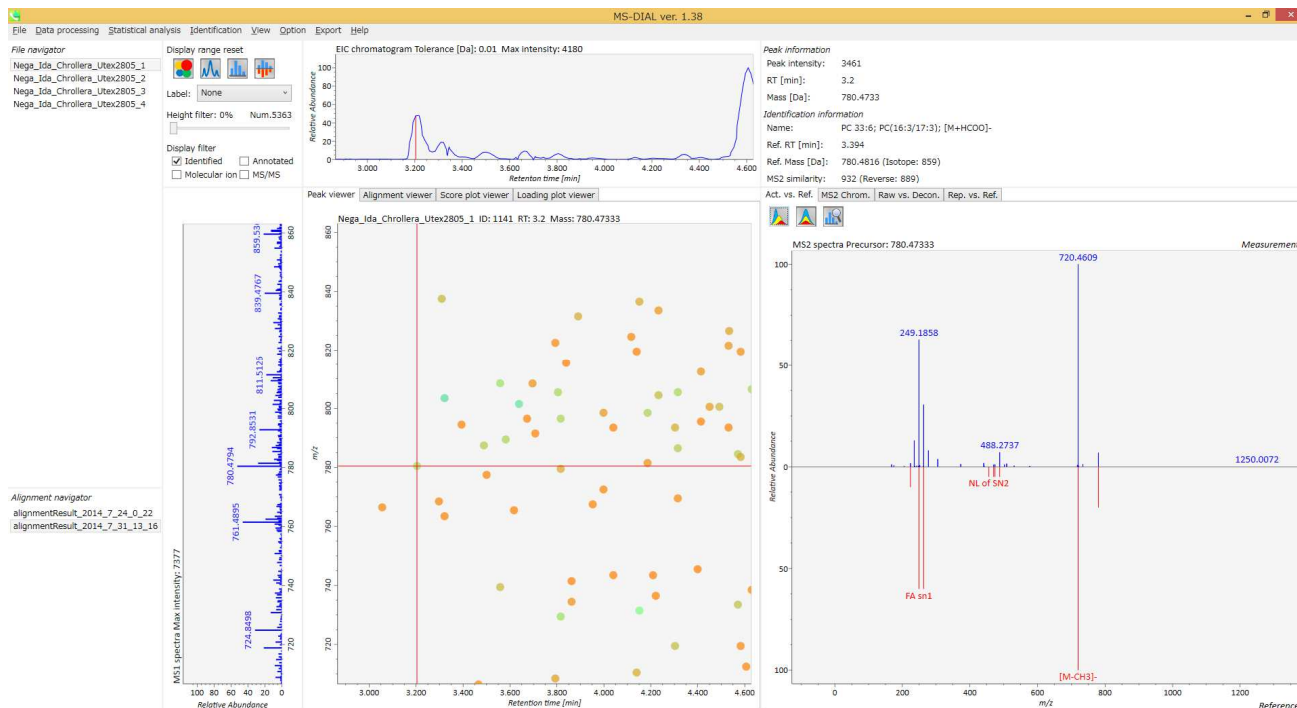

## Odd chain lipid: *Chlorella variabilis* DGDG(16:3/17:3)

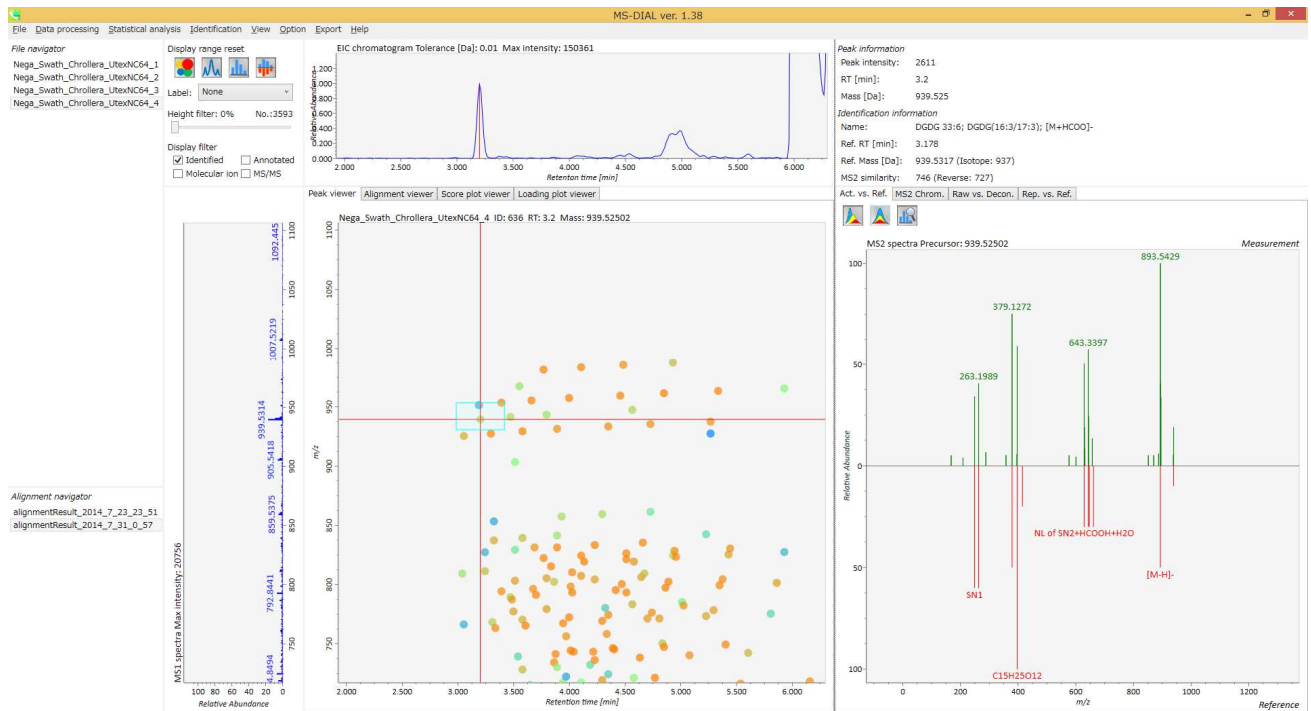

## Odd chain lipid: *Euglena gracilis* DGDG(16:3/17:1)

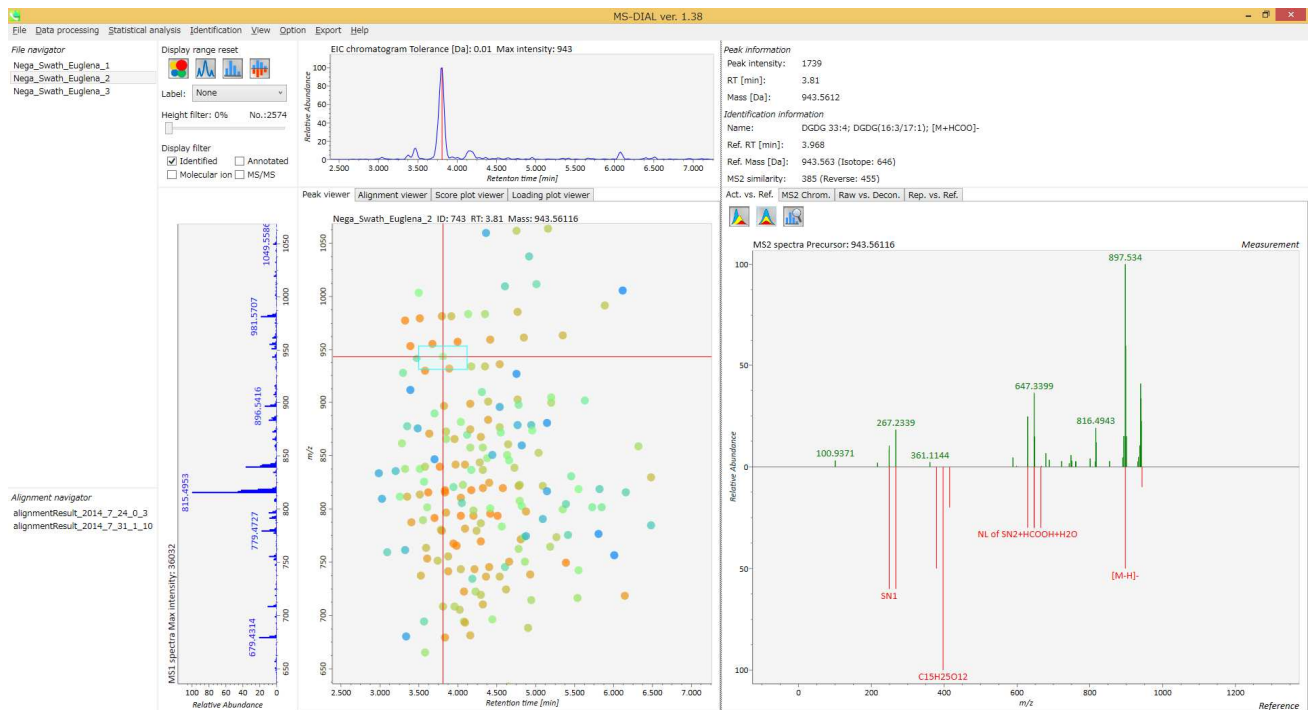

## Odd chain lipid: *Nannochloropsis oculata* DGTS(17:1/20:5)

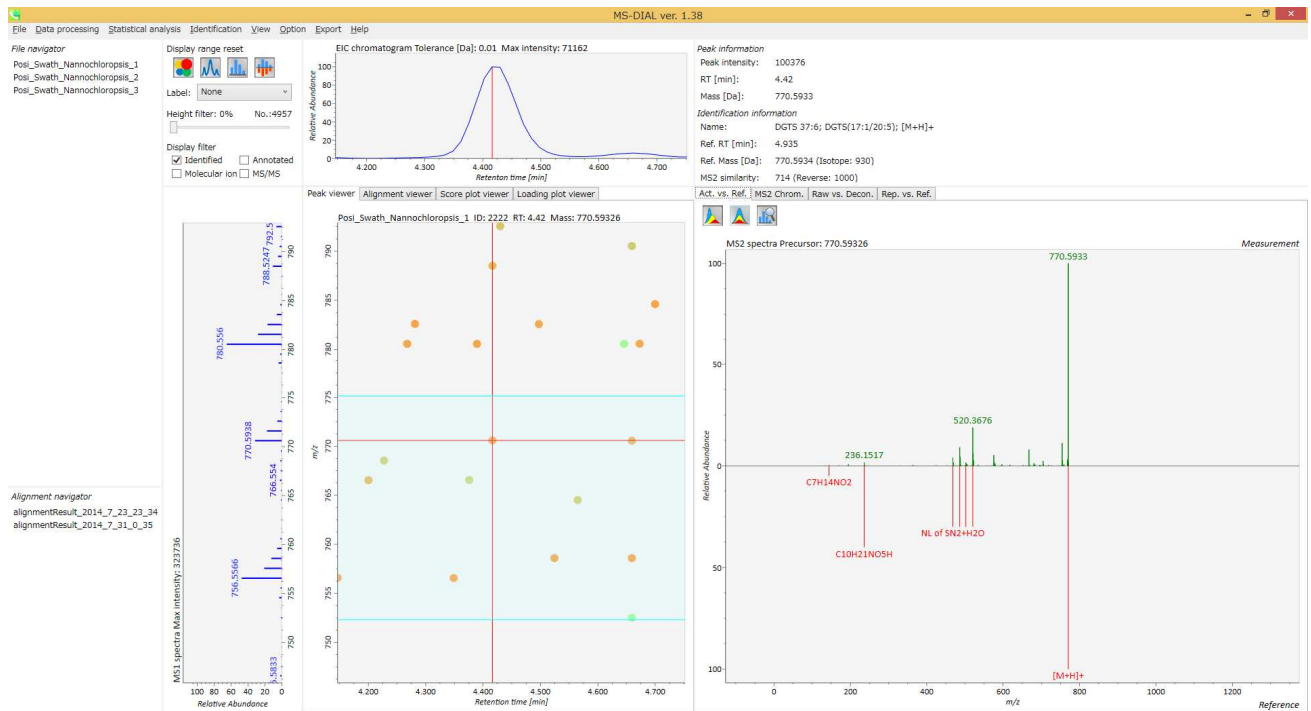

## Odd chain lipid: *Dunaliella salina* DGTS(19:1/19:1)

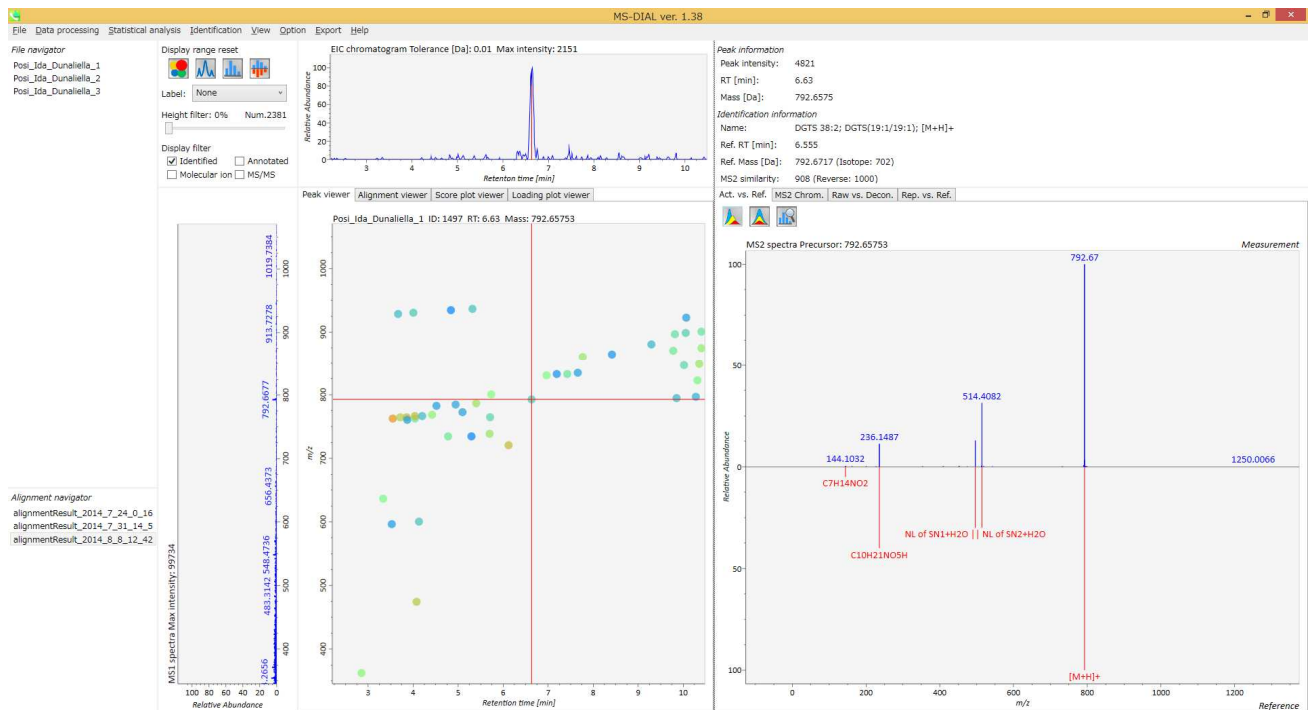

## Odd chain lipid: *Pleurochrysis carterae* SQDG(16:0/17:1)

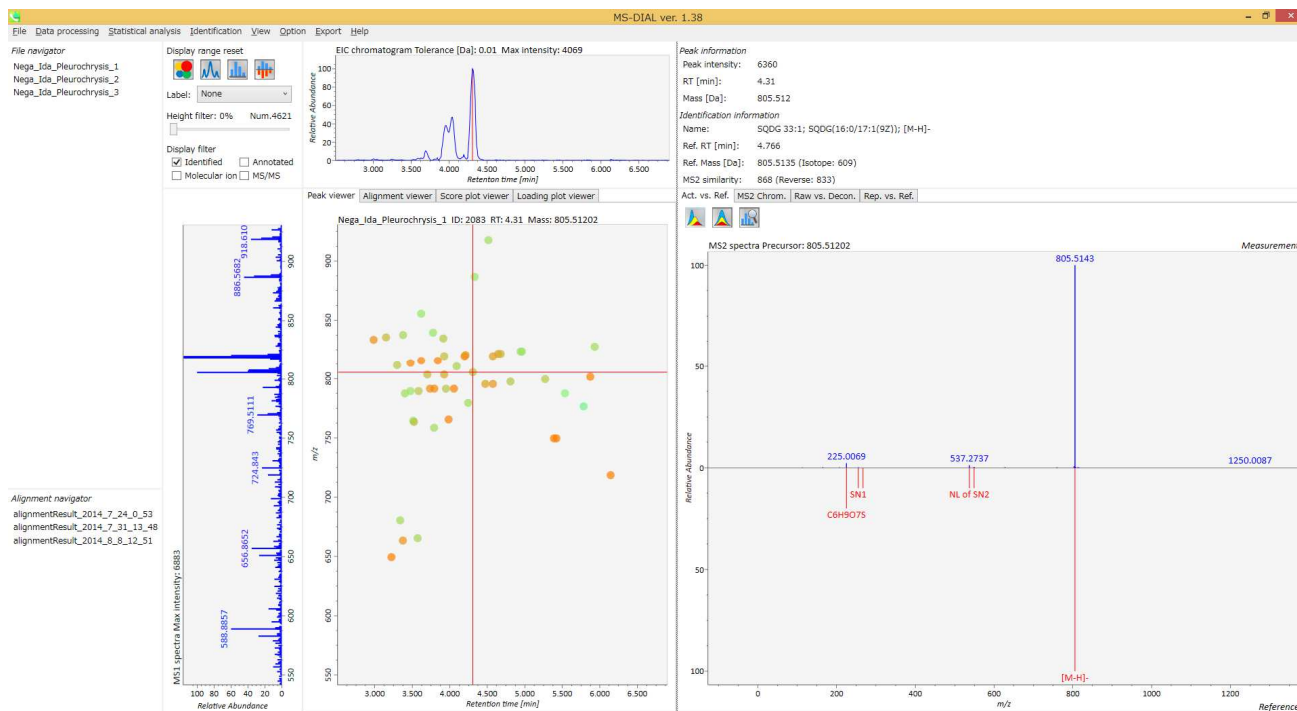

## Odd chain lipid: *Pavlova lutheri* SQDG(14:0/15:0)

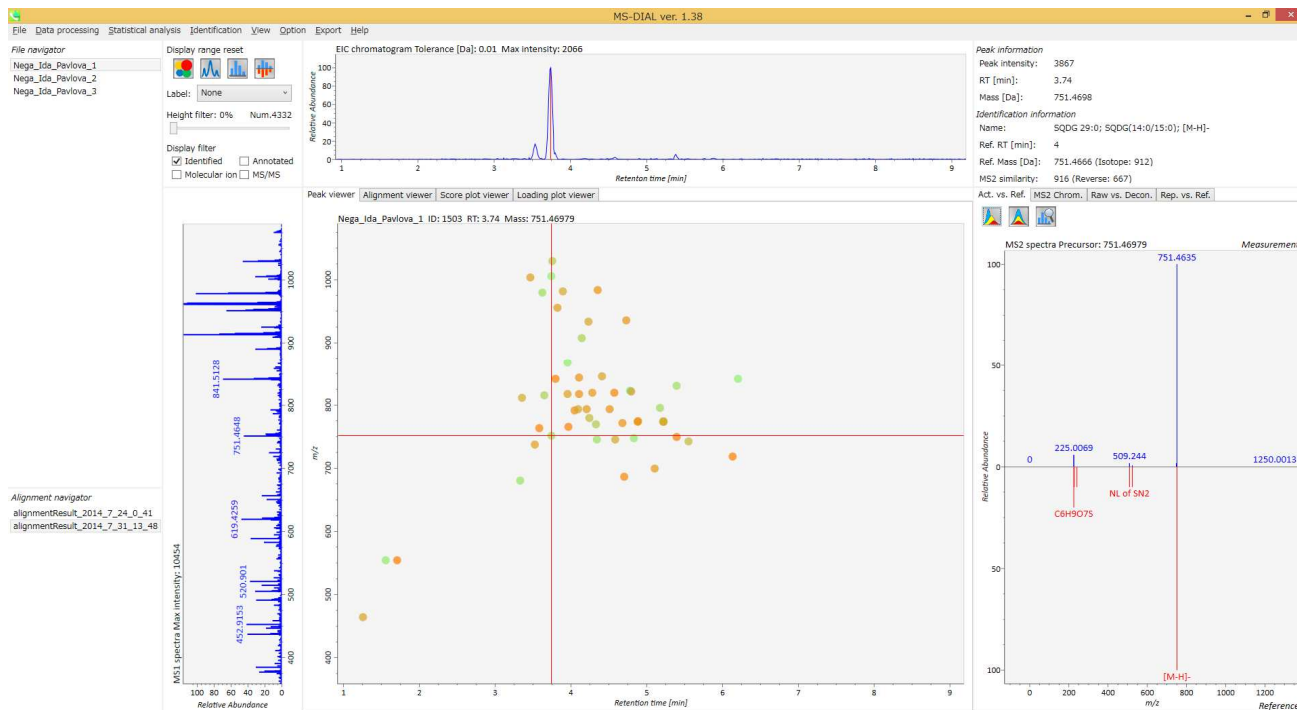

## DGTS lipid: *Euglena gracilis* DGTS(16:1/18:1)

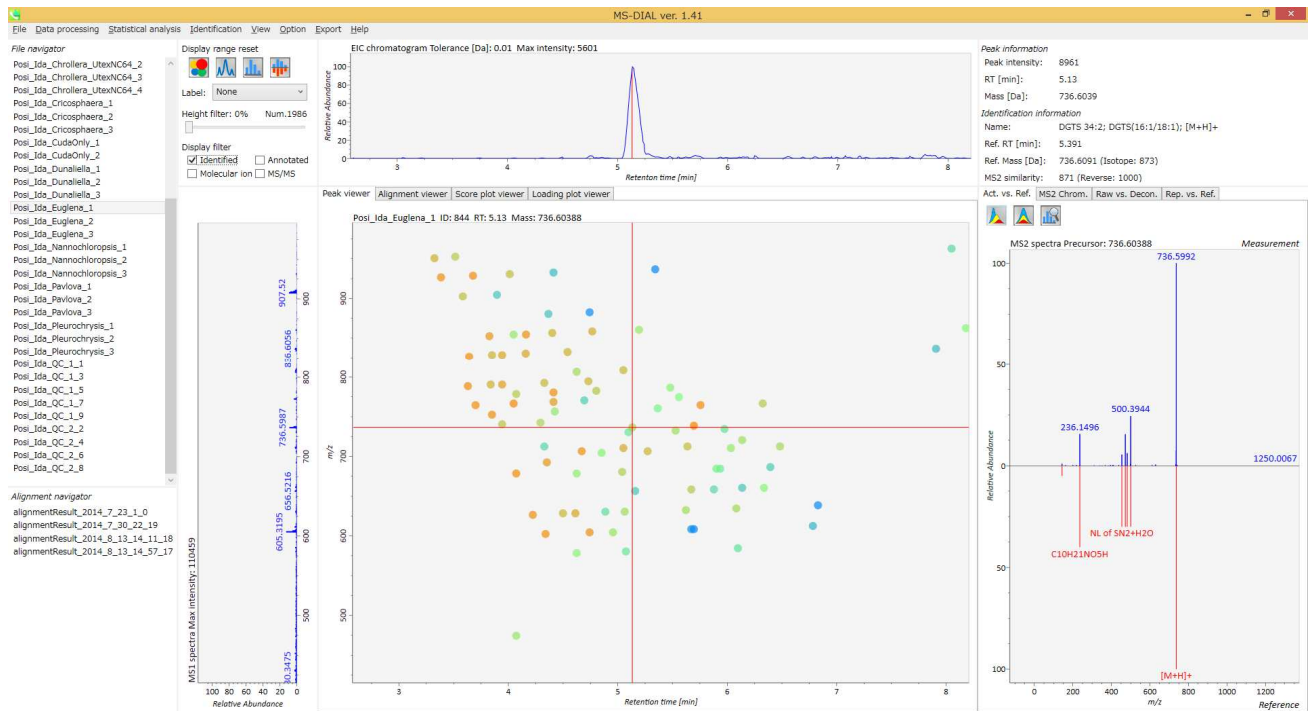

## DGTS lipid: *Euglena gracilis* DGTS(16:0/18:1)

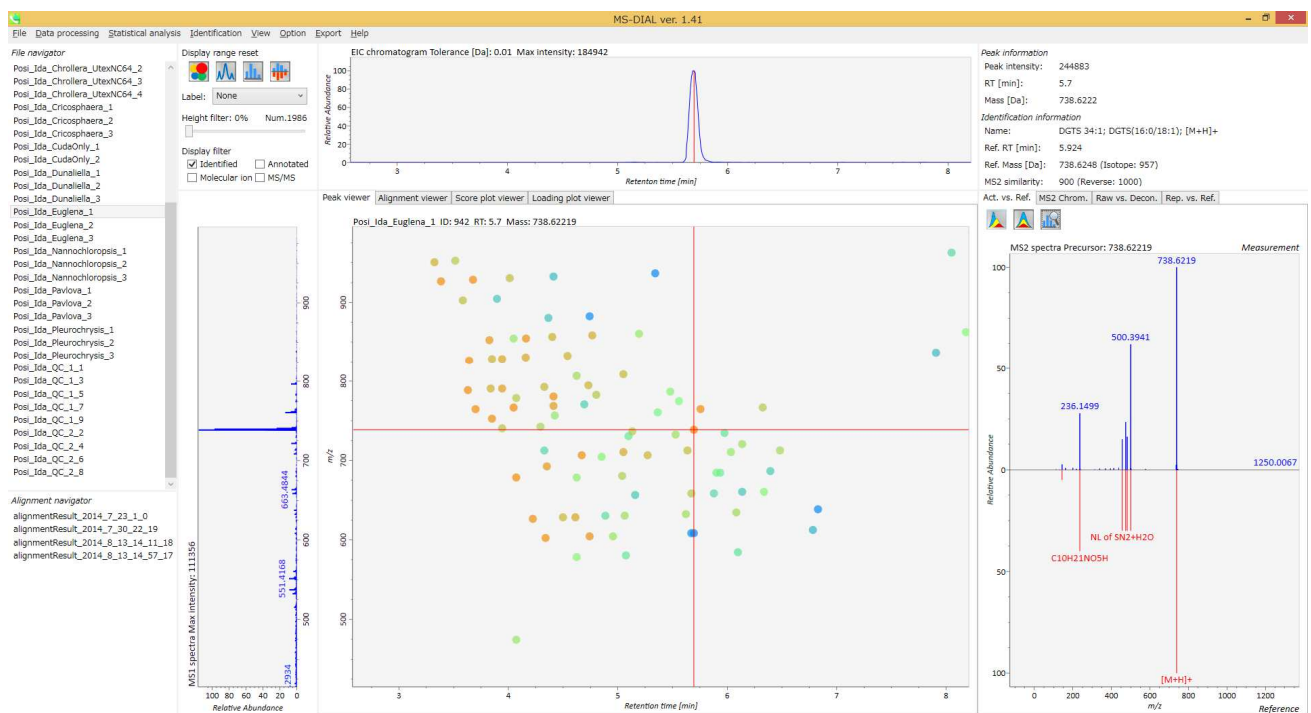

## DGTS lipid: *Nannochloropsis oculata* DGTS(16:0/20:4)

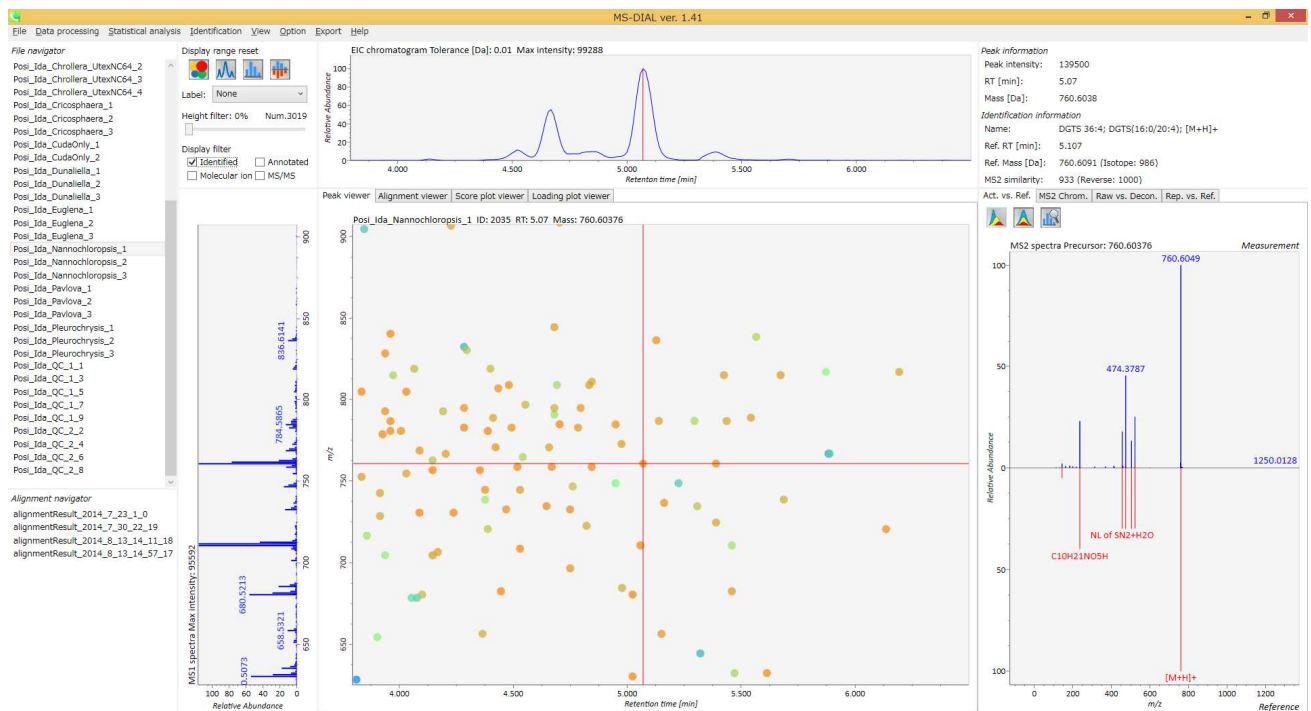

## DGTS lipid: *Nannochloropsis oculata* DGTS(17:0/20:5)

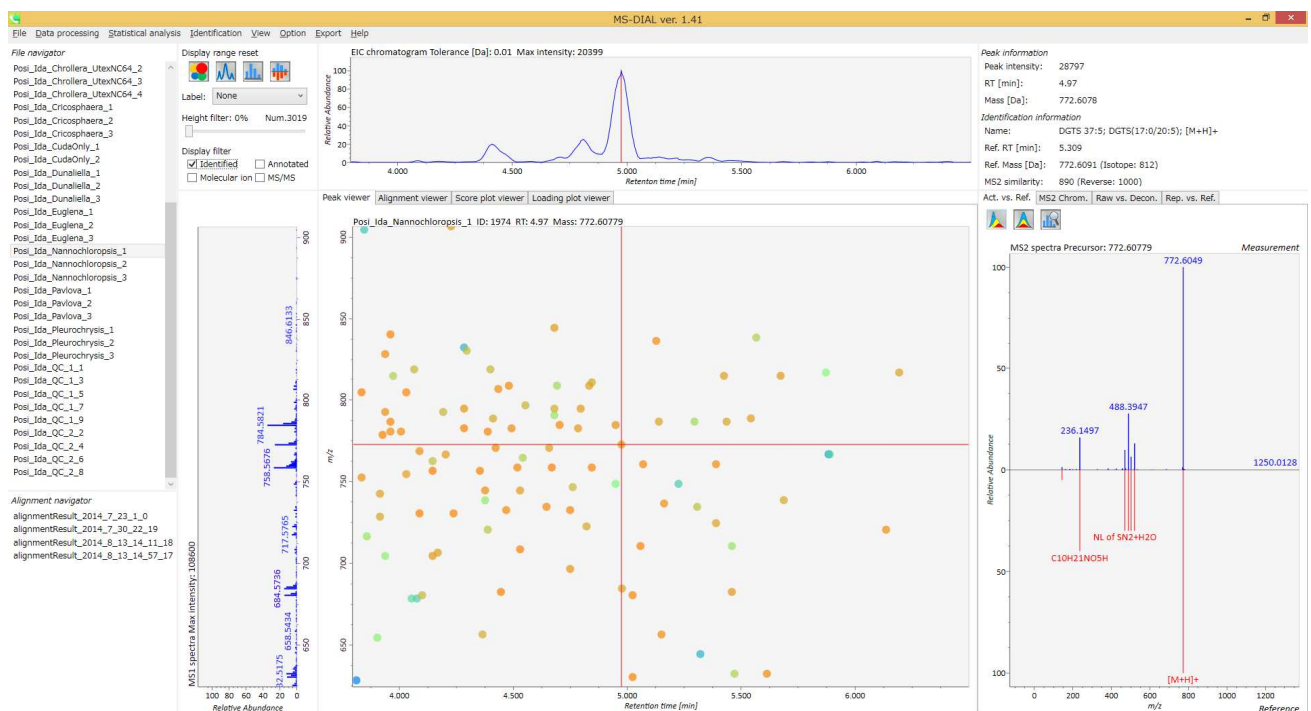



## DGTS lipid: *Dunaliella salina* DGTS(16:0/18:3)

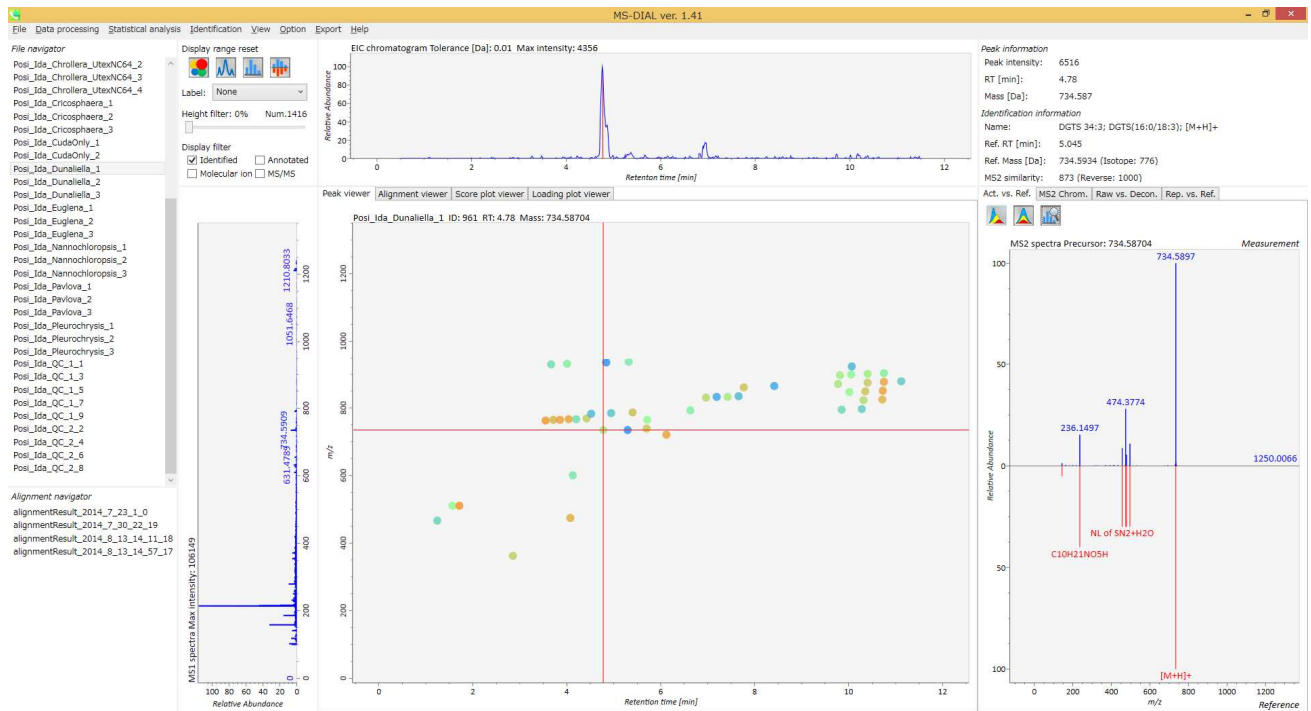

## DGTS lipid: *Dunaliella salina* DGTS(16:0/18:1)

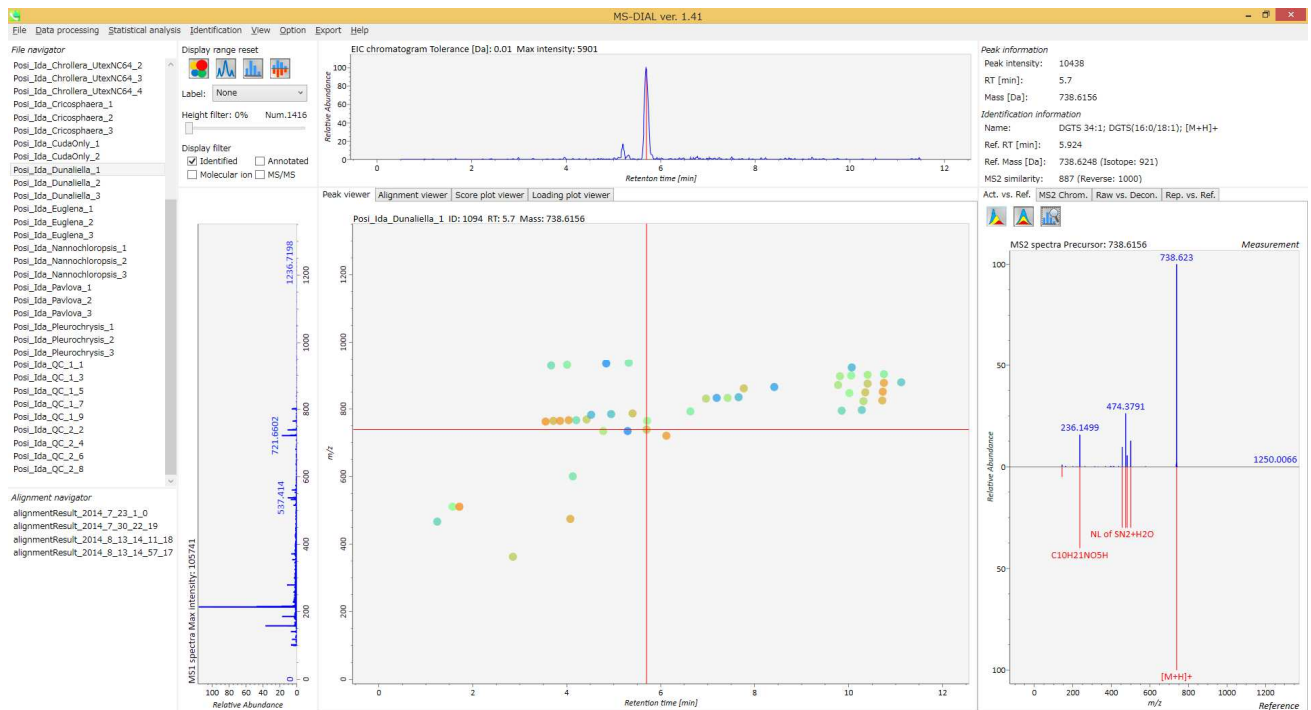

## DGTS lipid: *Pleurochrysis carterae* DGTS(16:0/22:6)

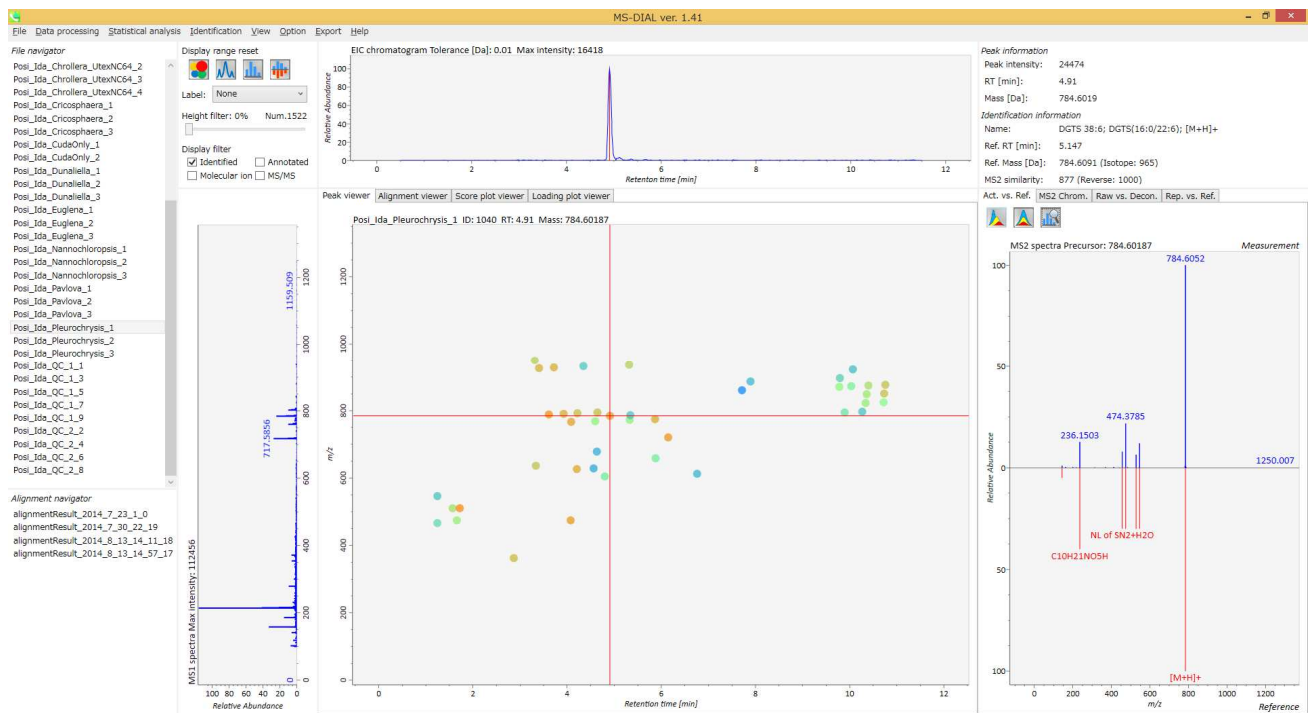

## DGTS lipid: *Pleurochrysis carterae* DGTS(16:0/22:5)

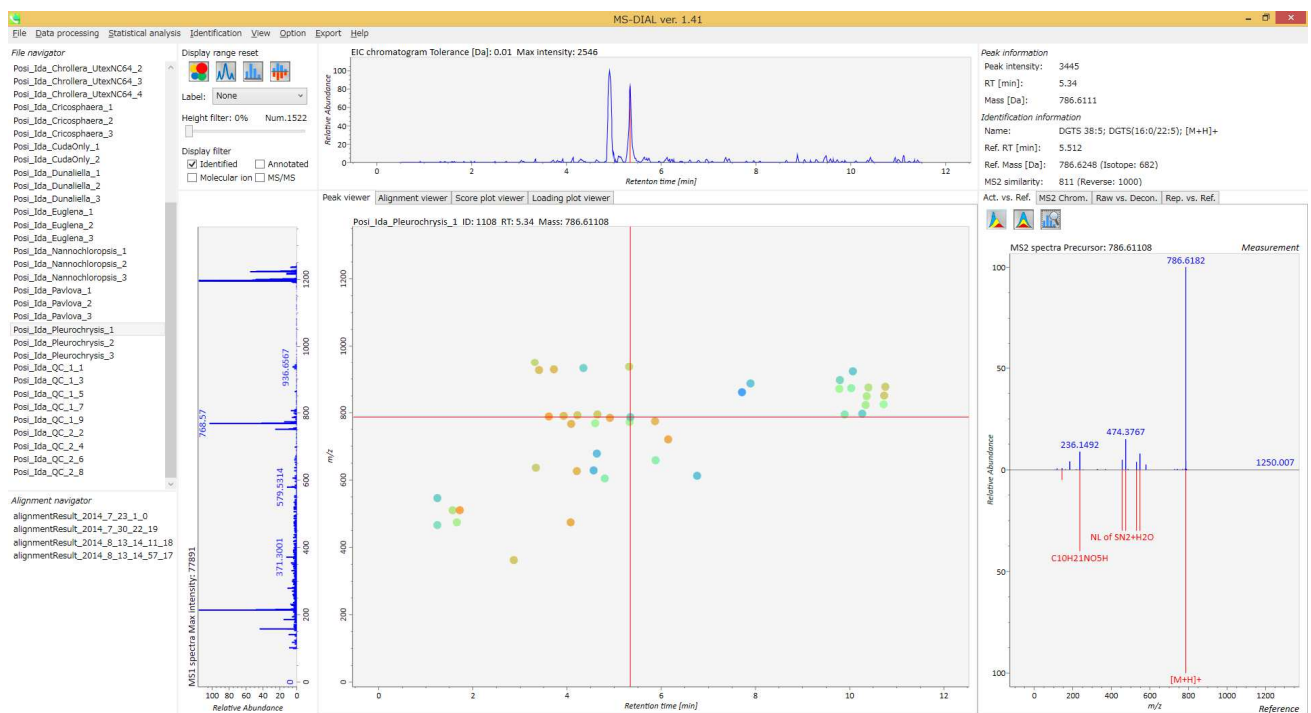

## DGTS lipid: *Pavlova lutheri* DGTS(14:0/16:1)

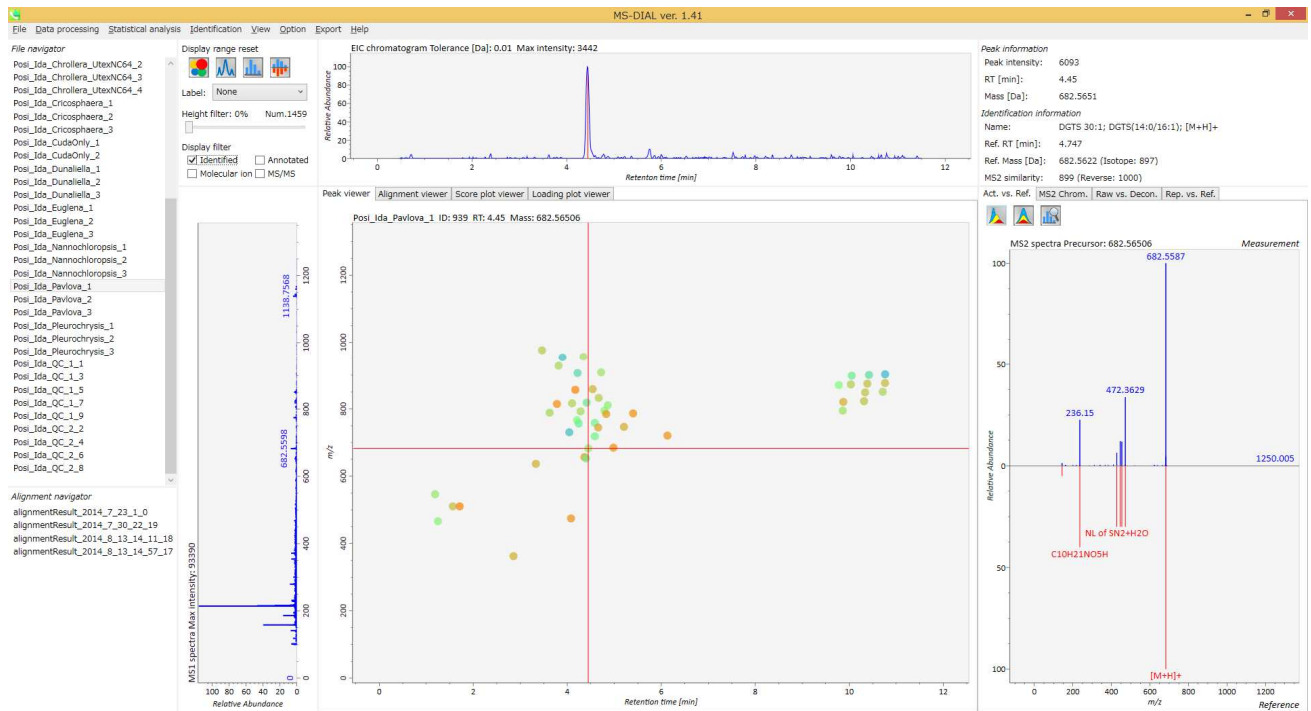

## DGTS lipid: *Pavlova lutheri* DGTS(16:0/22:6)

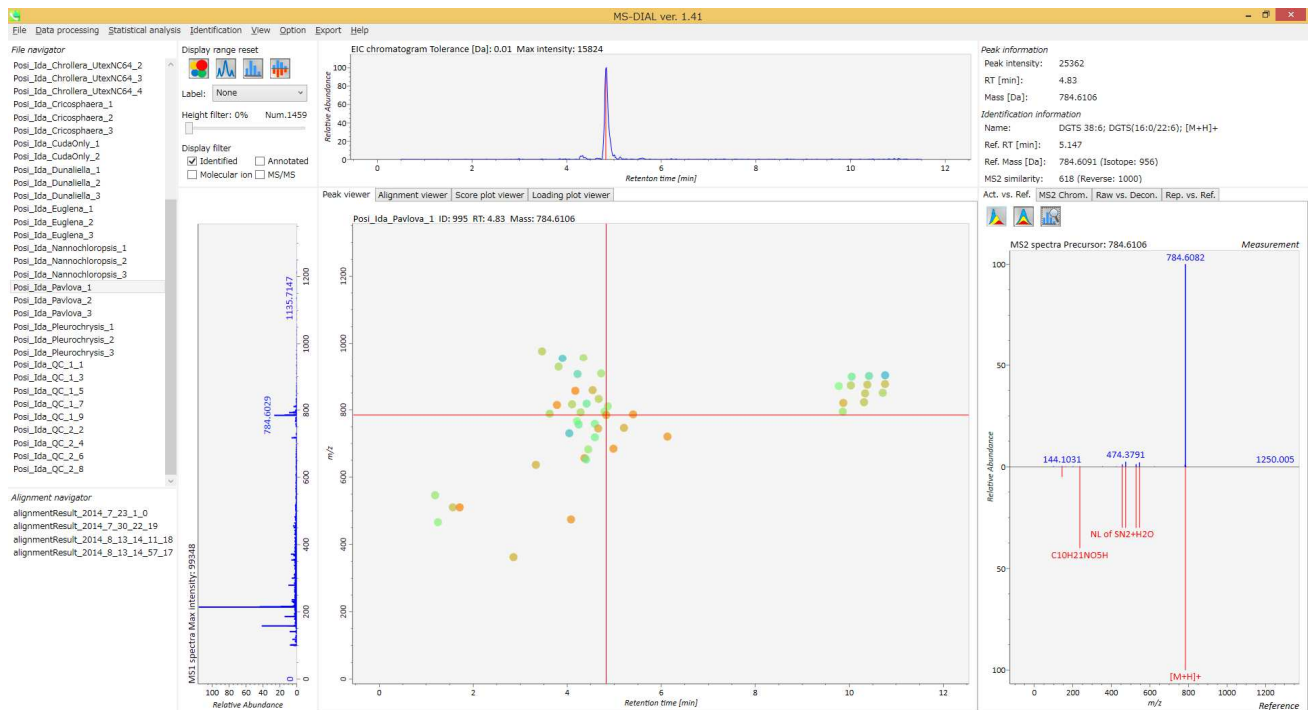

## 18:5 PUFA: *Chlamydomonas reinhardtii* DGTS(18:5/18:5)

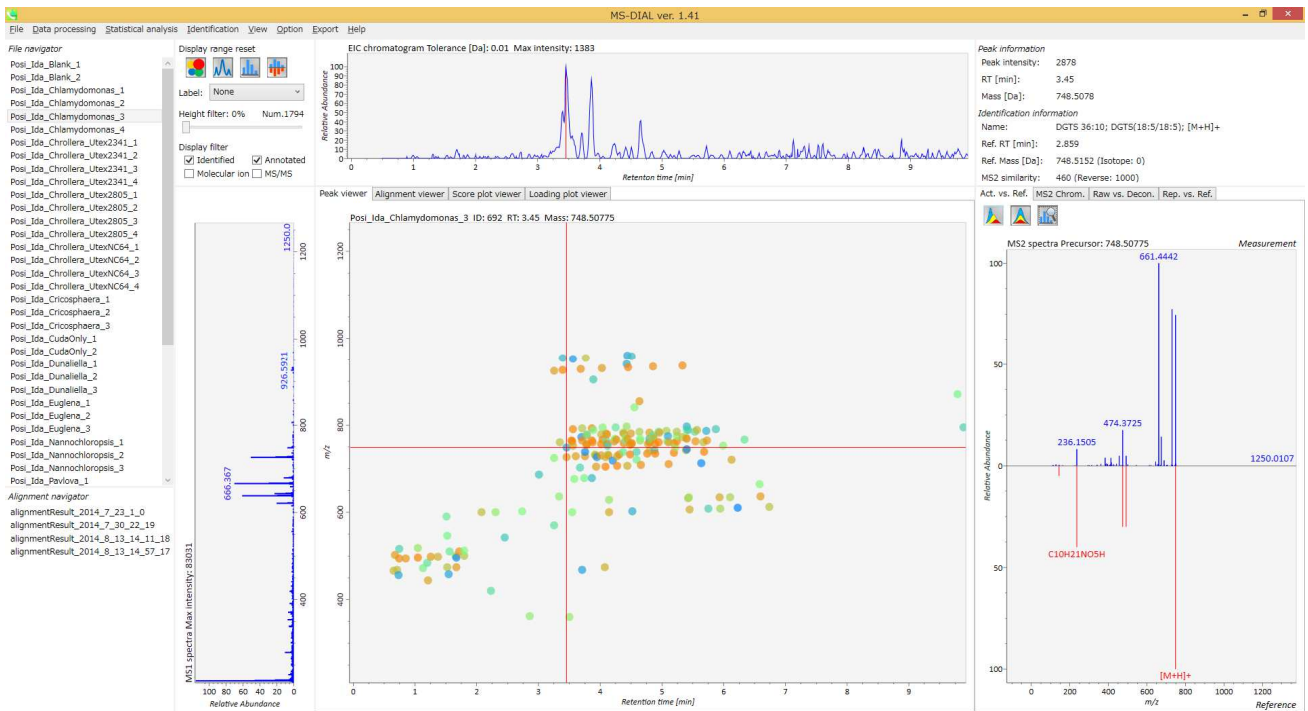

## 18:5 PUFA: *Nannochloropsis oculata* DGTS(18:5/20:5)

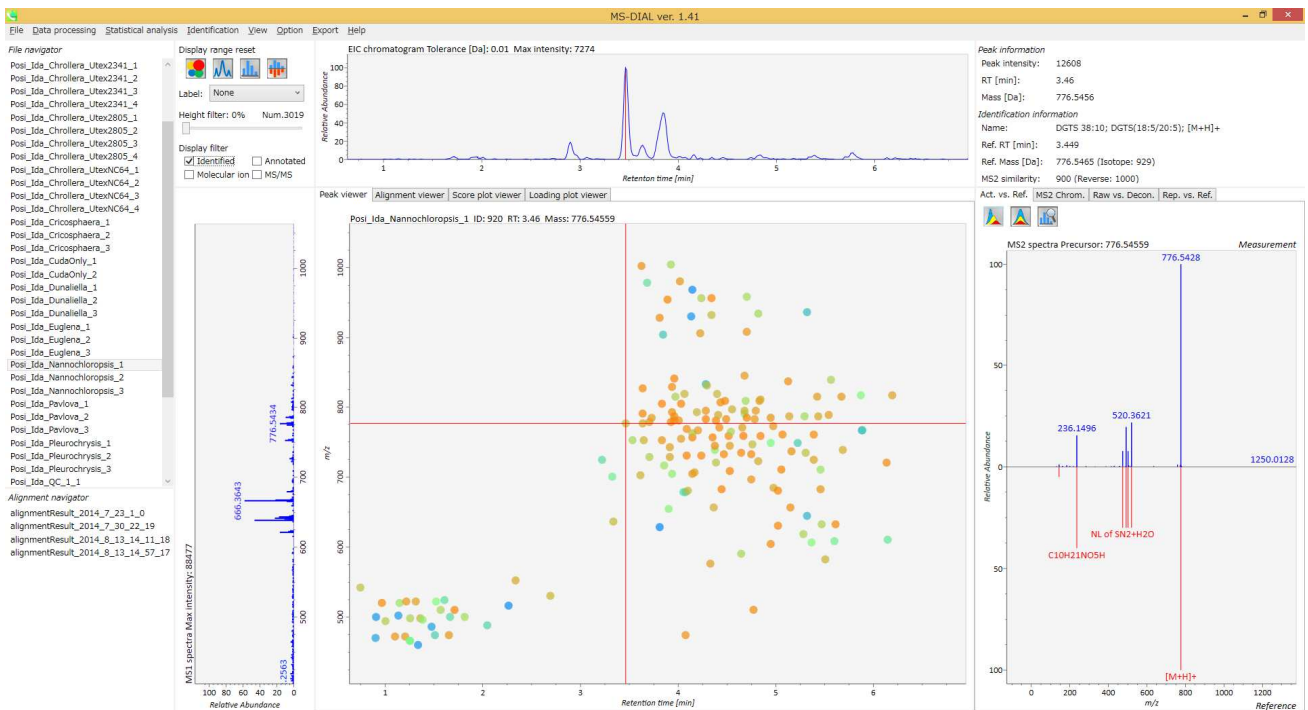

# 18:5 PUFA: *Pleurochrysis carterae* DGDG(16:2/18:5)

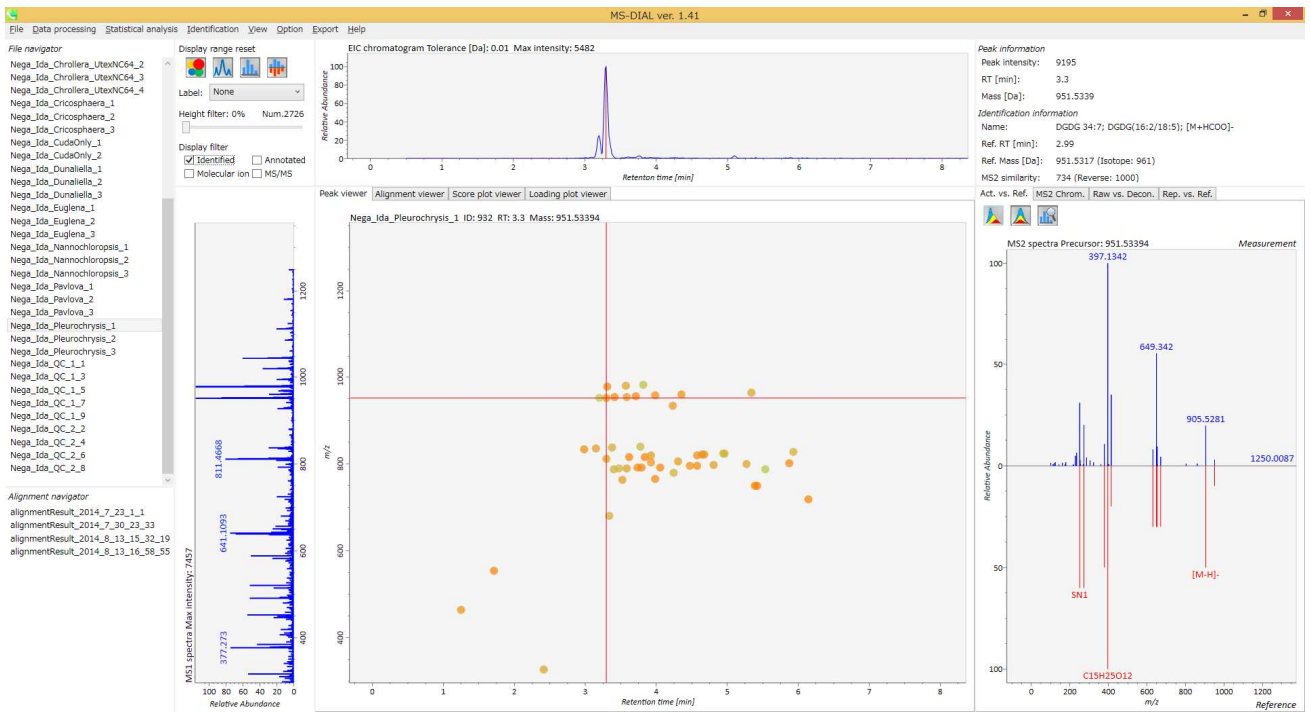

Data point —●— First derivative —●— Second derivative —●—

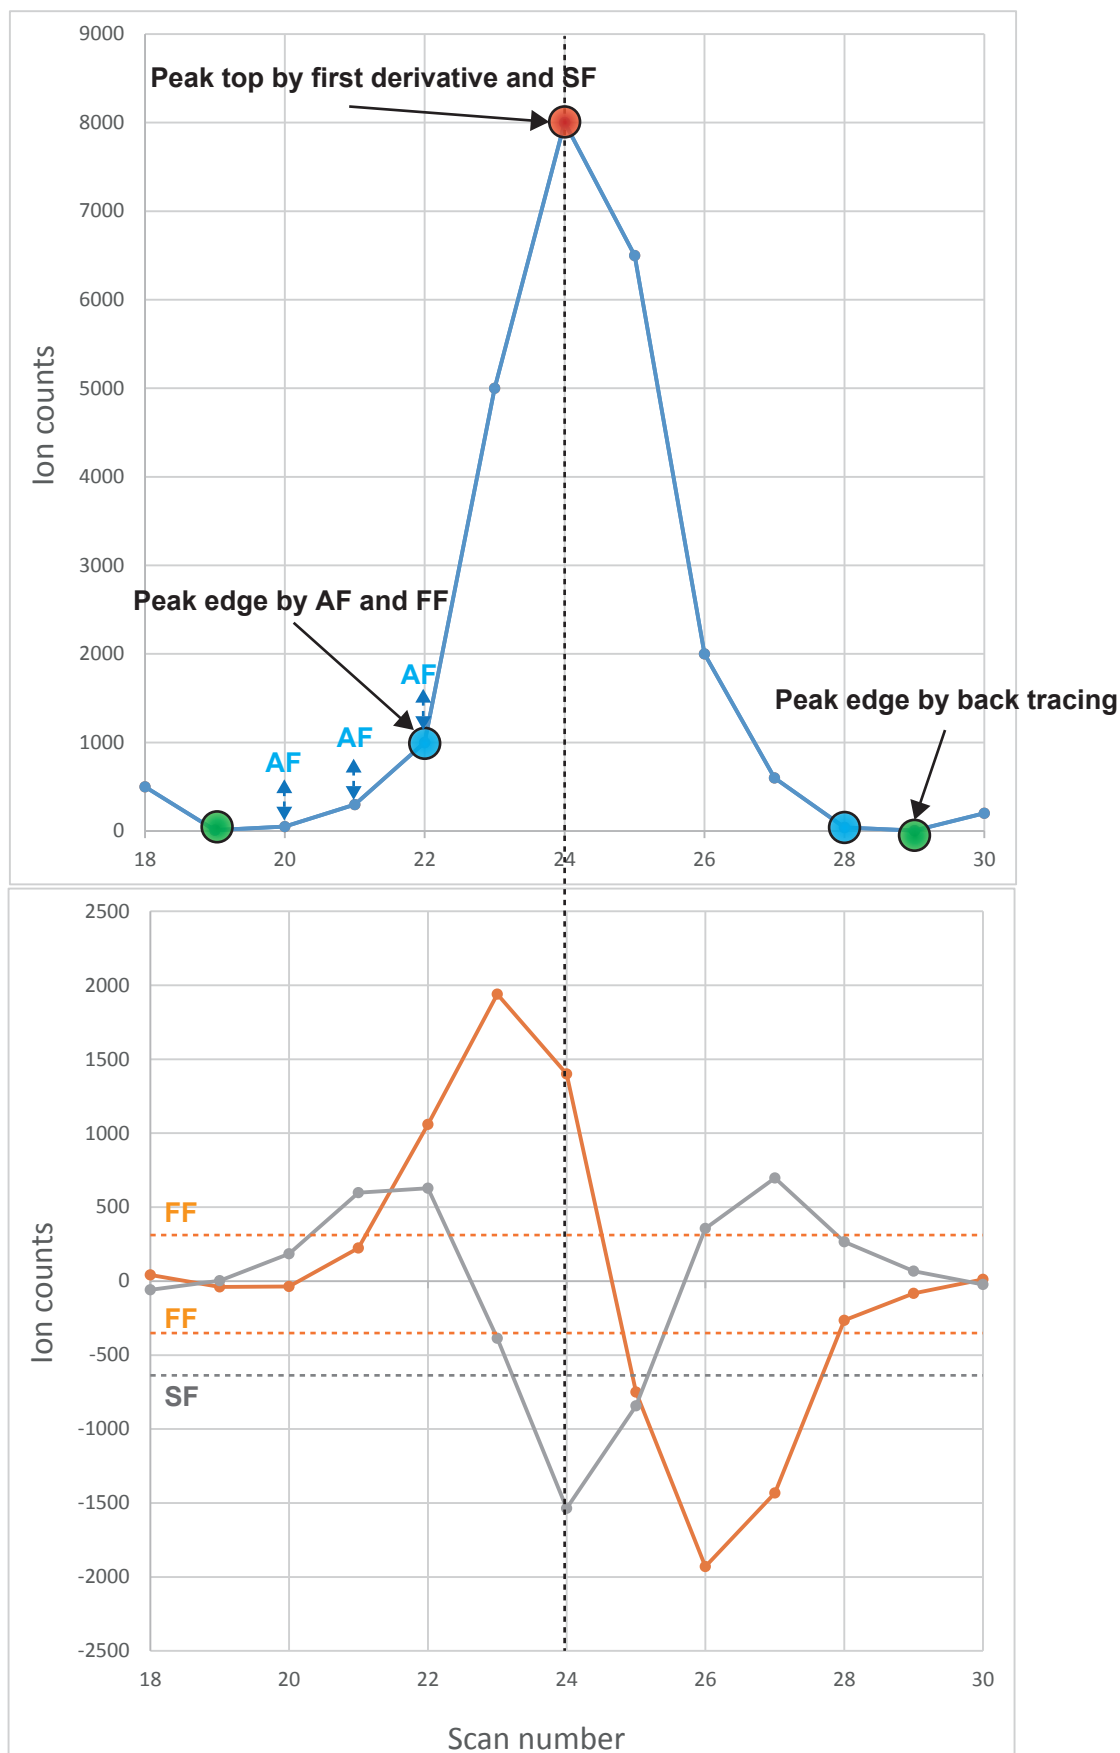

**Supplementary Fig. 7. Peak detection by three threshold values and back-tracing.** Blue, orange, and gray lines show the line plots of raw data points, first derivatives, and second derivatives, respectively. Blue dash with arrow, orange dash, and gray dash show the threshold values of amplitude filter (AF), first derivative filter (FF), and second derivative filter (SF), respectively. Blue circle shows the peak left- and right edge decided by the AF and FF thresholds. Green circle shows the final peak left- and right edge by the back-tracing method. The peak top described by the red circle is decided by the sign (positive/negative) change of the FF value and the SF threshold.

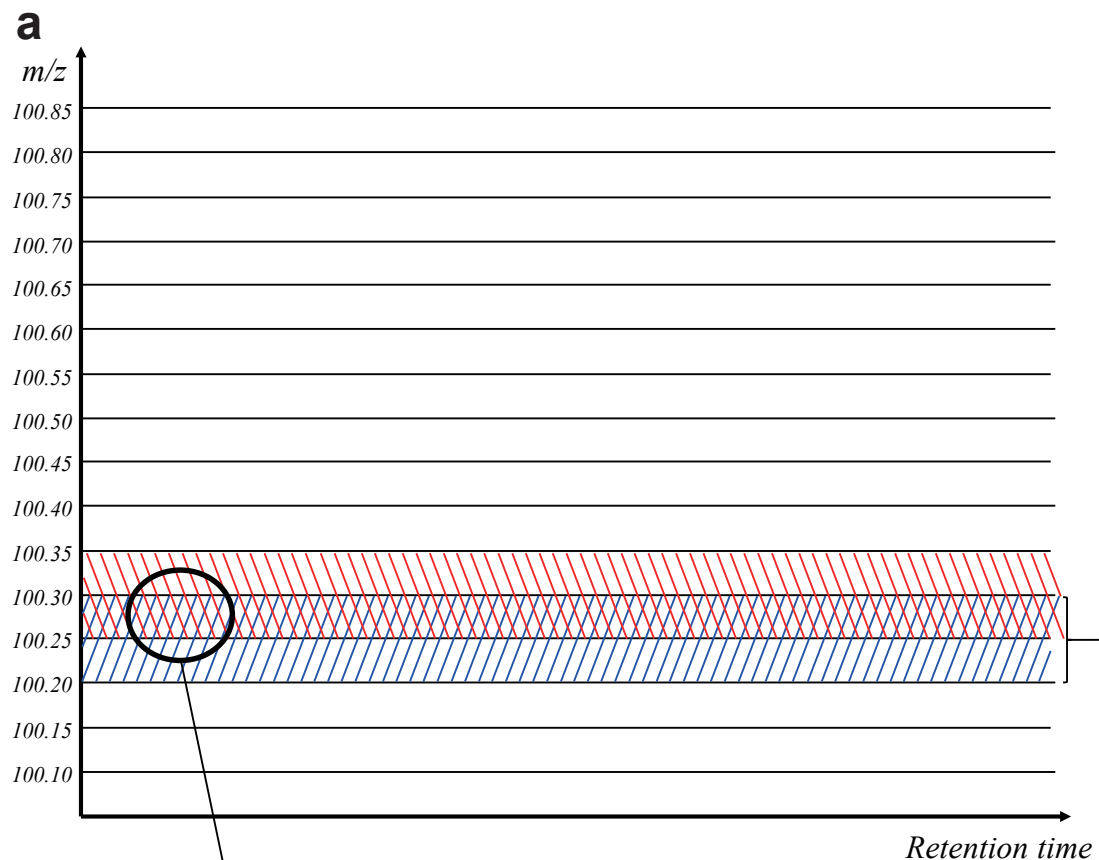

| Scan number | Retention time [min] | Base peak <i>m/z</i> | Base peak intensity |
|-------------|----------------------|----------------------|---------------------|
| 1           | 0.1                  | 100.2054             | 1                   |
| 2           | 0.12                 | 100.2053             | 10                  |
| 3           | 0.14                 | 100.2053             | 5                   |
| 4           | 0.16                 | 100.2052             | 50                  |
| 5           | 0.18                 | 100.2051             | 200                 |
| 6           | 0.2                  | 100.2054             | 1500                |
| 7           | 0.22                 | 100.2054             | 3000                |
| 8           | 0.24                 | 100.2054             | 1700                |
| 9           | 0.26                 | 100.2053             | 180                 |
| 10          | 0.28                 | 100.205              | 60                  |

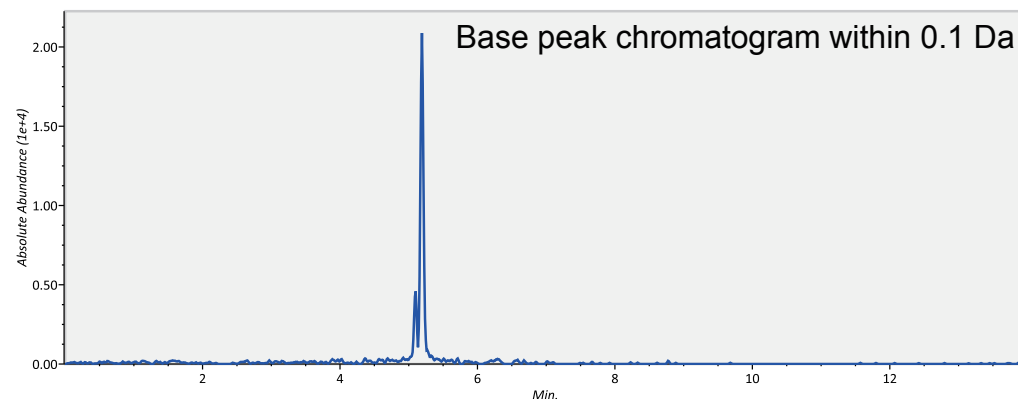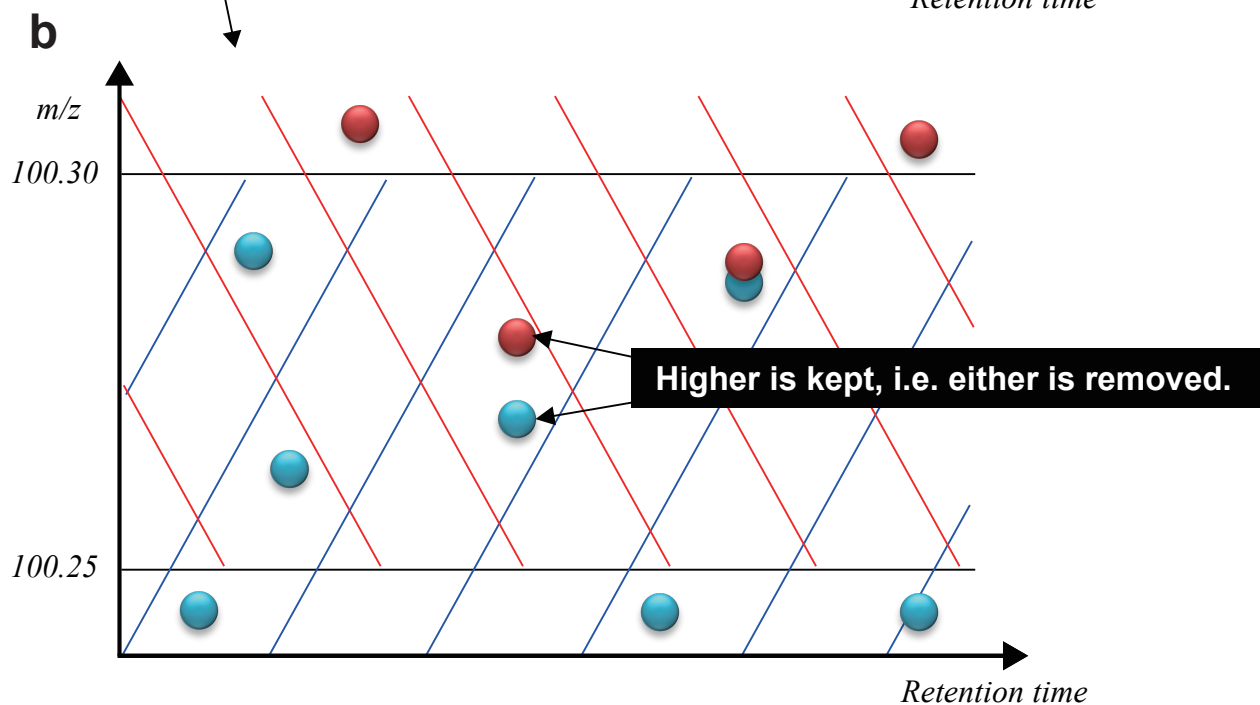

**Supplementary Fig. 8. Summary of the peak spotting method.**

(a) The base peak chromatogram is extracted for each mass slice of 0.1 Da (default). The retention time, base peak *m/z*, and peak intensity are shown in the top right table and the red color text indicates a spot.

(b) The blue and red spots show the detected peaks in *m/z* 100.20-100.30 and 100.25-100.35 bins, respectively. The spots of the same retention time and close *m/z* detected in adjacent bins are simply merged, i.e. the one with the higher intensity is kept.

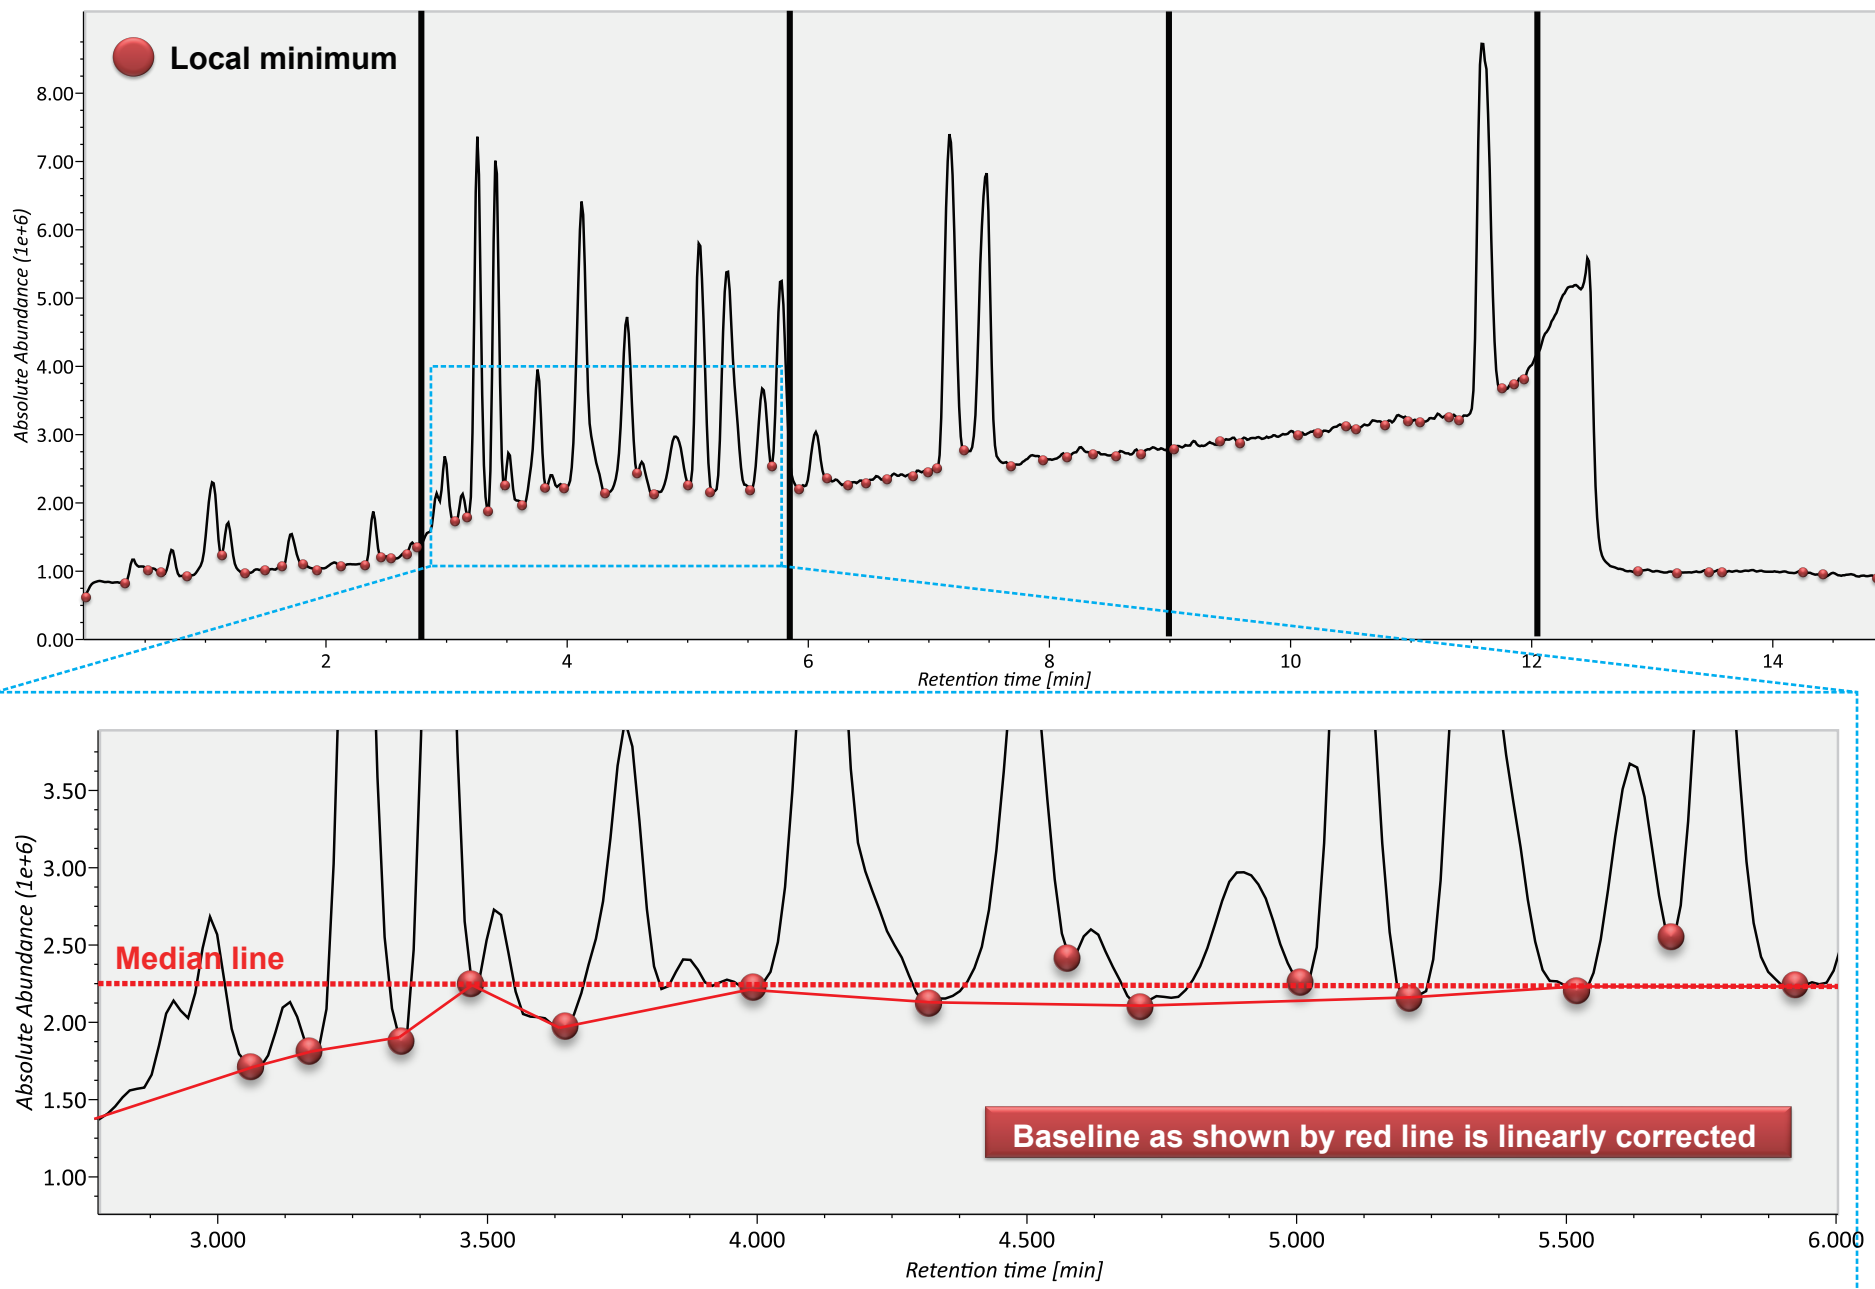

**Supplementary Fig. 9. Baseline correction of MS-DIAL program.** The local minima denoted by red circles are determined in each segment separated by black lines. The median value of the local minima is calculated for each segment. The local minima less than the median value are connected, from which all data points are subtracted.



## a. Making a reference peak table

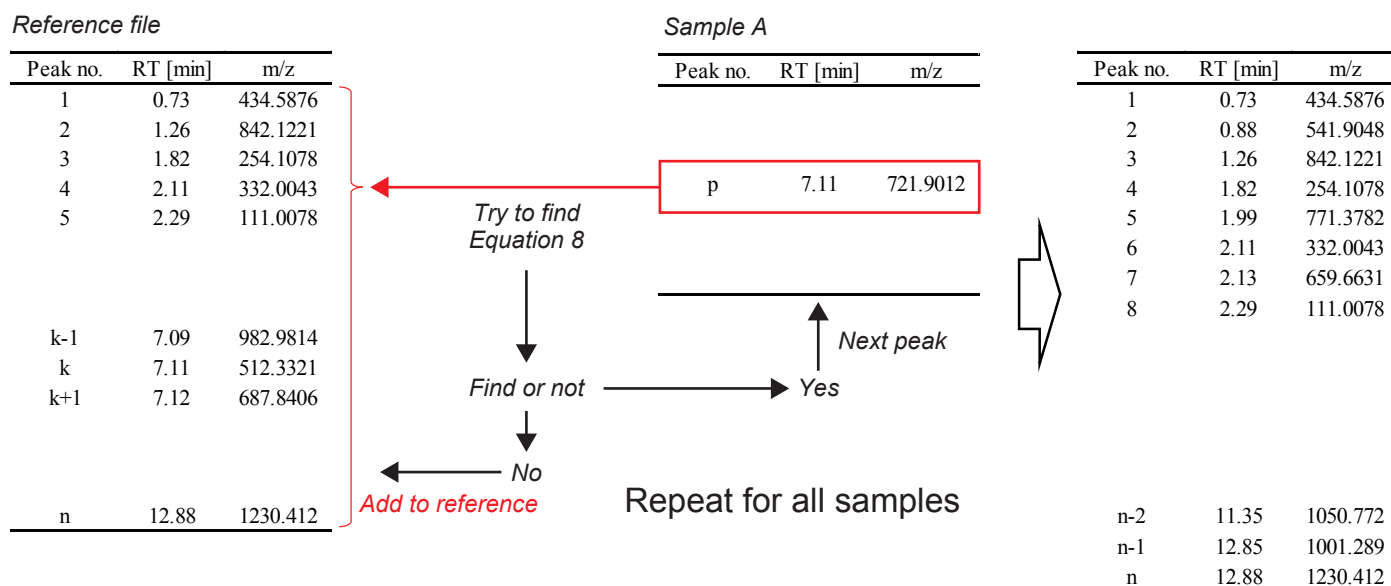

## b. Fitting each sample peak table to reference peak table

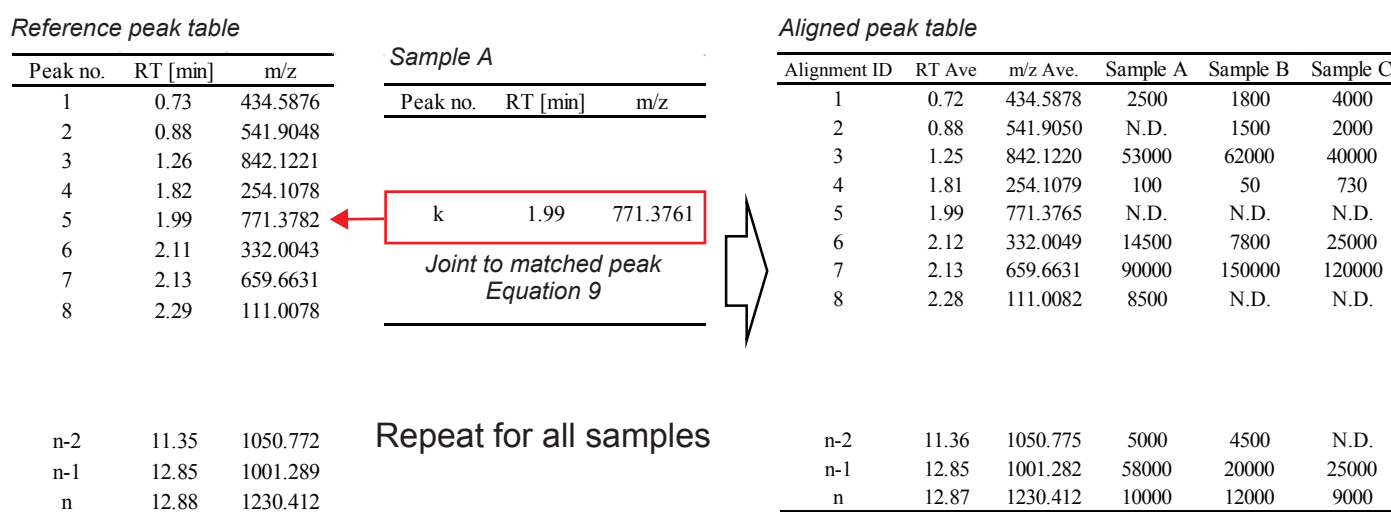

## c. Filtering aligned peaks

**Aligned peak table**

| Alignment ID | RT Ave. | m/z Ave. | Sample A | Sample B | Sample C | QC 1  | QC 2  | QC 3  |
|--------------|---------|----------|----------|----------|----------|-------|-------|-------|
| 1            | 0.72    | 434.5878 | 2500     | 1800     | 4000     | 1000  | N.D.  | 2000  |
| 2            | 0.88    | 541.9050 | N.D.     | 1500     | 2000     | 1400  | 2000  | 1500  |
| 3            | 1.25    | 842.1220 | 53000    | 62000    | 40000    | 45000 | 30000 | 35000 |
| 4            | 1.81    | 254.1079 | 100      | 50       | 730      | 100   | 50    | 730   |
| 5            | 1.99    | 771.3765 | N.D.     | N.D.     | N.D.     | N.D.  | N.D.  | N.D.  |
| 6            | 2.12    | 332.0049 | 14500    | 7800     | 25000    | 14500 | 7800  | 25000 |
| 7            | 2.13    | 659.6631 | 90000    | 150000   | 120000   | 75000 | 70000 | 72000 |
| 8            | 2.28    | 111.0082 | 8500     | N.D.     | N.D.     | 8500  | 8800  | 9000  |
| ...          | ...     | ...      | ...      | ...      | ...      | ...   | ...   | ...   |
| n            | 12.87   | 1230.412 | 10000    | 12000    | 9000     | 15000 | 12000 | 13000 |

**Condition**

1. Peak count filter: 80%
2. QC 'at least' filter: ON

**Exclusions:**

- Alignment ID 1: Excluded (Step 3)
- Alignment ID 5: Excluded (Step 1)
- Alignment ID 8: Excluded (Step 2)

## d. Interpolating missing values

**Aligned peak table**

| Alignment ID | RT Ave. | m/z Ave. | Sample A | Sample B | Sample C | QC 1  | QC 2  | QC 3  |
|--------------|---------|----------|----------|----------|----------|-------|-------|-------|
| 1'           | 0.88    | 541.9050 | N.D.     | 1500     | 2000     | 1400  | 2000  | 1500  |
| 2'           | 1.25    | 842.1220 | 53000    | 62000    | 40000    | 45000 | 30000 | 35000 |
| 3'           | 1.81    | 254.1079 | 100      | 50       | 730      | 100   | 50    | 730   |
| 4'           | 2.11    | 332.0049 | 14500    | 7800     | 25000    | 14500 | 7800  | 25000 |
| 5'           | 2.13    | 659.6631 | 90000    | 150000   | 120000   | 75000 | 70000 | 72000 |
| ...          | ...     | ...      | ...      | ...      | ...      | ...   | ...   | ...   |
| n'           | 12.87   | 1230.412 | 10000    | 12000    | 9000     | 15000 | 12000 | 13000 |

The maximum of raw data point within the blue range (equation 10) is interpolated.

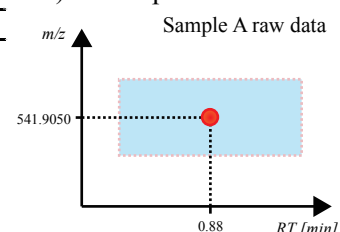

**Supplementary Fig. 10. Flow chart and summary of peak alignment.** The algorithm consists of four parts: (a) making a reference peak table, (b) fitting each sample peak table to reference peak table, (c) filtering aligned peaks, and (d) interpolating missing values.

**Supplementary Table 1. LipidBlast MS/MS information.** The focused 13 lipid classes, fatty acid length, precursor ion, and MS/MS spectrum are described. **(a)** LipidBlast MS/MS spectrum in positive ion mode. **(b)** LipidBlast MS/MS spectrum in negative ion mode. The ‘Fatty acid’ and ‘Record’ columns show the coverage of chain length and the total lipid number included in the LipidBlast library, respectively. The bracket shows the relative ion abundance standardized to Max 999 which is utilized for dot-product search. The word NL means neutral loss. In this study, the presence of fragment ions, which represent the lipid class or fatty acids, was manually confirmed after the automatic peak identification was finished in MS-DIAL software. The fragment ions described in ‘supplemental fragment’ column were also utilized to complement the identification result.

**(a) LipidBlast MS/MS spectrum in positive ion mode**

| <b>Lipid class</b>                     | <b>Short</b> | <b>Fatty acid</b> | <b>Record</b> | <b>Target precursor</b>    | <b>Class fragment</b> | <b>Fatty acid fragment</b>                                          | <b>Supplemental fragment</b>                            |
|----------------------------------------|--------------|-------------------|---------------|----------------------------|-----------------------|---------------------------------------------------------------------|---------------------------------------------------------|
| Diacylglyceryltrimethylhomoserines     | DGTS         | 10-26             | 8280          | [M+H] <sup>+</sup> (999)   | C10H21NO5H (400)      | NL of SN1 (300); NL of SN2 (300)                                    | C7H14NO2 (50); NL of SN1+H2O (300); NL of SN1+H2O (300) |
| Lysodiacylglyceryltrimethylhomoserines | lysoDGTS     | 10-26             | 91            | [M+H] <sup>+</sup> (400)   | C10H21NO5H (999)      | NL of SN1 SN2+H2O (50)                                              | [M+H-H2O] <sup>+</sup> (200); C7H14NO2 (100)            |
| Phosphatidylcholines                   | PC           | 10-26             | 4720          | [M+H] <sup>+</sup> (400)   | C5H15NO4P (999)       | NL of SN1 (50); NL of SN2 (50)                                      | NL of SN1+H2O (50); NL of SN1+H2O (50)                  |
| Lysophosphatidylcholines               | lysoPC       | 10-26             | 76            | [M+H] <sup>+</sup> (400)   | C5H15NO4P (999)       | NL of SN1 SN2 (50)                                                  | [M+H-H2O] <sup>+</sup> (150); NL of SN1 SN2+H2O (50)    |
| Phosphatidylethanolamines              | PE           | 10-26             | 4720          | [M+H] <sup>+</sup> (50)    | NL of C2H8NO4P (999)  | SN1-O (50); SN2-O (50)                                              | N/A                                                     |
| Lysophosphatidylethanolamines          | lysoPE       | 10-26             | 76            | [M+H] <sup>+</sup> (10)    | NL of C2H8NO4P (999)  | N/A                                                                 | N/A                                                     |
| Monoacylglycerols                      | MAG          | 10-26             | 70            | [M+NH4] <sup>+</sup> (100) | N/A                   | N/A                                                                 | [M+H] <sup>+</sup> (50); [M+H-H2O] <sup>+</sup> (999)   |
| Diacylglycerols                        | DAG          | 10-26             | 1964          | [M+NH4] <sup>+</sup> (100) | N/A                   | NL of SN1+NH3 (999);<br>NL of SN2+NH3 (999)                         | [M+H] <sup>+</sup> (50); [M+H-H2O] <sup>+</sup> (400)   |
| Triacylglycerols                       | TAG          | 10-26             | 6170          | [M+NH4] <sup>+</sup> (100) | N/A                   | NL of SN1+NH3 (999);<br>NL of SN2+NH3 (999);<br>NL of SN3+NH3 (999) | [M+H] <sup>+</sup> (50)                                 |
| Monogalactosyldiacylglycerols          | MGDG         | 10-26             | 4720          | [M+NH4] <sup>+</sup> (100) | NL of C6H11O6 (600)   | NL of SN1+C6H11O6 (999);<br>NL of SN2+C6H11O6 (999)                 | NL of C6H11O6+H2O (600)                                 |
| Digalactosyldiacylglycerols            | DGDG         | 10-26             | 4720          | [M+NH4] <sup>+</sup> (100) | NL of C12H21O11 (999) | NL of SN1+C12H21O11 (999);<br>NL of SN2+C12H21O11 (999)             | NL of C12H21O11+H2O (999)                               |

**(b) LipidBlast MS/MS spectrum in negative ion mode**

| Lipid class                    | Short  | Fatty acid | Record | Target precursor | Class fragment      | Fatty acid fragment  | Supplemental fragment                                                                                                                              |
|--------------------------------|--------|------------|--------|------------------|---------------------|----------------------|----------------------------------------------------------------------------------------------------------------------------------------------------|
| Phosphatidylcholines           | PC     | 10-26      | 4720   | [M+HCOO]- (200)  | [M-CH3]- (999)      | SN1 (600); SN2 (600) | NL of SN1+CH3 (50); NL of SN2+CH3 (50); NL of SN1+CH3+H2O (50); NL of SN2+CH3+H2O (50); C7H15NO5P (100)                                            |
| Lysophosphatidylcholines       | lysoPC | 10-26      | 76     | [M+HCOO]- (10)   | [M-CH3]- (400)      | SN1 SN2 (999)        | C7H15NO5P (100)                                                                                                                                    |
| Phosphatidylethanolamines      | PE     | 10-26      | 4720   | [M-H]- (700)     | C5H11NO5P (100)     | SN1 (999); SN2 (999) | NL of SN1 (50); NL of SN2 (50); NL of SN1+H2O (50); NL of SN2+H2O (50)                                                                             |
| Lysophosphatidylethanolamines  | lysoPE | 10-26      | 76     | [M-H]- (200)     | C5H11NO5P (100)     | SN1  SN2 (999)       | NL of SN1 SN2 (100); NL of SN1 SN2+H2O (100)                                                                                                       |
| Phosphatidylserines            | PS     | 10-26      | 4720   | [M-H]- (500)     | NL of C3H5NO2 (600) | SN1 (999); SN2 (999) | NL of C3H5NO2+SN1 (200); NL of C3H5NO2+SN2 (200); NL of C3H5NO2+SN1+H2O (200); NL of C3H5NO2+SN2+H2O (200)                                         |
| Phosphatidic acids             | PA     | 10-26      | 4720   | [M-H]- (400)     | C3H6O5P (300)       | SN1 (999); SN2 (999) | NL of SN1 (100); NL of SN2 (100); NL of SN1+H2O (100); NL of SN2+H2O (100)                                                                         |
| Phosphatidylinositols          | PI     | 10-26      | 4720   | [M-H]- (999)     | C9H14O9P (200)      | SN1 (200); SN2 (200) | NL of SN1 (100); NL of SN2 (100); NL of SN1+H2O (100); NL of SN2+H2O (100); C6H10O8P (200)                                                         |
| Phosphatidylglycerols          | PG     | 10-26      | 4720   | [M-H]- (500)     | N/A                 | SN1 (999); SN2 (999) | NL of SN1 (100); NL of SN2 (100); NL of SN1+H2O (100); NL of SN2+H2O (100)                                                                         |
| Free fatty acid                | FA     | 10-26      | 43     | [M-H]- (999)     | N/A                 | N/A                  | N/A                                                                                                                                                |
| Monogalactosyldiacylglycerols  | MGDG   | 10-26      | 4720   | [M+HCOO]- (300)  | C9H17O8 (50)        | SN1 (999); SN2 (999) | [M-H]- (100); NL of SN1+HCOOH (50); NL of SN2+HCOOH (50)                                                                                           |
| Digalactosyldiacylglycerols    | DGDG   | 10-26      | 4720   | [M+HCOO]- (100)  | C15H25O12 (999)     | SN1 (999); SN2 (999) | [M-H]- (500); NL of SN1+HCOOH (300); NL of SN2+HCOOH (300); NL of SN1+HCOOH+H2O (300); NL of SN2+HCOOH+H2O (300); C15H27O13 (200); C15H23O11 (500) |
| Sulfoquinovosyldiacylglycerols | SQDG   | 10-26      | 4720   | [M-H]- (999)     | C6H9O7S (200)       | SN1 (100); SN2 (100) | NL of SN1 (100); NL of SN2 (100)                                                                                                                   |

**Supplementary Table 2. Identification result of major lipid classes of 9 algal species.**

|                 | <i>Chlamydomonas reinhardtii</i> | <i>UTEX2341</i> | <i>Chlorella sorokiniana</i> | <i>Chlorella variabilis</i> | <i>Euglena gracilis</i> | <i>Nannochloropsis oculata</i> | <i>Dunaliella salina</i> | <i>Pleurochrysis carterae</i> | <i>Pavlova lutheri</i> | Total      |
|-----------------|----------------------------------|-----------------|------------------------------|-----------------------------|-------------------------|--------------------------------|--------------------------|-------------------------------|------------------------|------------|
| <i>Positive</i> |                                  |                 |                              |                             |                         |                                |                          |                               |                        |            |
| DAG             | 10 / 10                          | 6 / 6           | 8 / 12                       | 12 / 13                     | 31 / 28                 | 17 / 14                        | 1 / 1                    | 7 / 3                         | 1 / 0                  | 93 / 87    |
| TAG             | 11 / 9                           | 15 / 10         | 4 / 4                        | 31 / 26                     | 141 / 112               | 53 / 42                        | 26 / 20                  | 23 / 16                       | 16 / 13                | 320 / 252  |
| MGDG            | 13 / 13                          | 9 / 9           | 15 / 12                      | 15 / 14                     | 13 / 9                  | 11 / 6                         | 7 / 5                    | 13 / 8                        | 12 / 10                | 108 / 86   |
| DGDG            | 11 / 10                          | 12 / 12         | 10 / 7                       | 14 / 14                     | 11 / 9                  | 21 / 15                        | 4 / 3                    | 11 / 6                        | 8 / 7                  | 102 / 83   |
| lysoDGTS        | 14 / 11                          | 0 / 0           | 0 / 0                        | 0 / 0                       | 5 / 6                   | 17 / 16                        | 0 / 0                    | 2 / 1                         | 1 / 0                  | 39 / 34    |
| DGTS            | 64 / 49                          | 0 / 0           | 0 / 0                        | 0 / 0                       | 8 / 5                   | 78 / 57                        | 6 / 4                    | 3 / 2                         | 5 / 10                 | 164 / 127  |
| lysoPC          | 0 / 0                            | 3 / 4           | 9 / 8                        | 0 / 0                       | 4 / 1                   | 5 / 6                          | 0 / 1                    | 0 / 1                         | 1 / 1                  | 22 / 22    |
| PC              | 0 / 0                            | 14 / 13         | 25 / 18                      | 29 / 16                     | 23 / 28                 | 49 / 33                        | 0 / 2                    | 0 / 0                         | 4 / 2                  | 144 / 112  |
| lysoPE          | 0 / 0                            | 0 / 0           | 3 / 3                        | 0 / 0                       | 0 / 0                   | 2 / 0                          | 0 / 0                    | 0 / 0                         | 0 / 0                  | 5 / 3      |
| PE              | 3 / 1                            | 7 / 6           | 16 / 12                      | 17 / 13                     | 8 / 2                   | 14 / 5                         | 0 / 0                    | 1 / 0                         | 3 / 0                  | 69 / 39    |
| Total           | 126 / 103                        | 66 / 60         | 90 / 76                      | 118 / 96                    | 244 / 200               | 267 / 194                      | 44 / 36                  | 60 / 37                       | 51 / 43                | 1066 / 845 |
| <i>Negative</i> |                                  |                 |                              |                             |                         |                                |                          |                               |                        |            |
| MGDG            | 16 / 12                          | 14 / 14         | 25 / 19                      | 24 / 21                     | 23 / 18                 | 13 / 14                        | 7 / 6                    | 20 / 18                       | 15 / 12                | 157 / 134  |
| DGDG            | 16 / 13                          | 12 / 12         | 15 / 10                      | 24 / 18                     | 29 / 17                 | 27 / 22                        | 8 / 6                    | 19 / 15                       | 12 / 10                | 162 / 123  |
| SQDG            | 7 / 12                           | 6 / 12          | 10 / 6                       | 4 / 8                       | 8 / 22                  | 12 / 20                        | 2 / 6                    | 5 / 15                        | 4 / 11                 | 58 / 112   |
| lysoPC          | 0 / 0                            | 3 / 3           | 8 / 6                        | 0 / 0                       | 4 / 0                   | 8 / 5                          | 1 / 0                    | 0 / 0                         | 1 / 1                  | 25 / 15    |
| PC              | 0 / 0                            | 14 / 13         | 19 / 16                      | 18 / 15                     | 23 / 17                 | 26 / 27                        | 0 / 0                    | 0 / 0                         | 2 / 1                  | 102 / 89   |
| lysoPE          | 0 / 0                            | 0 / 0           | 6 / 4                        | 2 / 0                       | 1 / 0                   | 3 / 3                          | 0 / 0                    | 0 / 0                         | 0 / 0                  | 12 / 7     |
| PE              | 6 / 4                            | 11 / 8          | 19 / 13                      | 17 / 15                     | 16 / 11                 | 10 / 9                         | 3 / 1                    | 0 / 0                         | 2 / 1                  | 84 / 62    |
| PG              | 8 / 8                            | 11 / 9          | 18 / 16                      | 11 / 10                     | 6 / 5                   | 12 / 10                        | 7 / 7                    | 1 / 1                         | 5 / 3                  | 79 / 69    |
| PI              | 3 / 2                            | 3 / 3           | 9 / 5                        | 4 / 7                       | 3 / 4                   | 6 / 9                          | 2 / 1                    | 0 / 0                         | 0 / 1                  | 30 / 32    |
| PS              | 0 / 0                            | 3 / 3           | 1 / 1                        | 3 / 2                       | 1 / 1                   | 1 / 0                          | 0 / 0                    | 0 / 0                         | 0 / 0                  | 9 / 7      |
| PA              | 0 / 0                            | 0 / 0           | 0 / 0                        | 0 / 0                       | 4 / 5                   | 0 / 0                          | 0 / 0                    | 0 / 0                         | 0 / 0                  | 4 / 5      |
| FA              | 2 / 2                            | 1 / 1           | 1 / 3                        | 1 / 3                       | 2 / 2                   | 3 / 2                          | 3 / 1                    | 5 / 6                         | 2 / 1                  | 20 / 21    |
| Total           | 58 / 53                          | 78 / 78         | 131 / 99                     | 108 / 99                    | 120 / 102               | 121 / 121                      | 33 / 28                  | 50 / 55                       | 43 / 41                | 742 / 676  |

The numbers to the left and right of the slash indicate the number of identified lipids in SWATH and DDA methods, respectively. The row and column include lipid class names and algal names targeted in this study.

**Supplementary Table 3. Identification result of *Chlamydomonas reinhardtii* under data-dependent acquisition (DDA accumulation time 50 ms) and SWATH (isolation window, 65 Da; accumulation time, 30 ms).**

|        | SWATH | DDA |
|--------|-------|-----|
| MGDG   | 17    | 12  |
| DGDG   | 23    | 13  |
| SQDG   | 16    | 12  |
| lysoPC | 0     | 0   |
| PC     | 0     | 0   |
| lysoPE | 0     | 0   |
| PE     | 7     | 4   |
| PG     | 15    | 8   |
| PI     | 4     | 2   |
| PS     | 0     | 0   |
| PA     | 0     | 0   |
| FA     | 3     | 2   |
| Total  | 86    | 53  |

**Supplementary Table 4. Data processing parameters of MS-DIAL software used in this study. (a)**

SWATH positive ion mode in the hydrophilic metabolite analysis, **(b)** SWATH/DDA positive ion mode

in the lipid analysis, and **(c)** SWATH/DDA negative ion mode in the lipid analysis.

### (a) SWATH positive ion mode in the hydrophilic metabolite analysis

---

|                                                                    |                                                                                                                                                                                                                                          |
|--------------------------------------------------------------------|------------------------------------------------------------------------------------------------------------------------------------------------------------------------------------------------------------------------------------------|
| Retention time begin                                               | 0 min                                                                                                                                                                                                                                    |
| Retention time end                                                 | 14 min                                                                                                                                                                                                                                   |
| Mass range begin                                                   | 50 Da                                                                                                                                                                                                                                    |
| Mass range end                                                     | 500 Da                                                                                                                                                                                                                                   |
| MS <sup>1</sup> tolerance for centroid                             | 0.01 Da                                                                                                                                                                                                                                  |
| MS <sup>2</sup> tolerance for centroid                             | 0.1 Da                                                                                                                                                                                                                                   |
| Peak detection-based                                               | Checked                                                                                                                                                                                                                                  |
| Smoothing method                                                   | Linear weighted moving average                                                                                                                                                                                                           |
| Smoothing level                                                    | 2 scan                                                                                                                                                                                                                                   |
| Minimum peak width                                                 | 5 scan                                                                                                                                                                                                                                   |
| Minimum peak height                                                | 1000 amplitude                                                                                                                                                                                                                           |
| Mass slice width                                                   | 0.1 Da                                                                                                                                                                                                                                   |
| Band width                                                         | 5 scan                                                                                                                                                                                                                                   |
| Segment number                                                     | 1                                                                                                                                                                                                                                        |
| Peak consideration                                                 | Both                                                                                                                                                                                                                                     |
| Sigma window value                                                 | 0.001 min                                                                                                                                                                                                                                |
| Exclude after precursor                                            | Checked                                                                                                                                                                                                                                  |
| Retention time tolerance for peak identification                   | 0.5 min                                                                                                                                                                                                                                  |
| Accurate mass tolerance (MS <sup>1</sup> ) for peak identification | 0.025                                                                                                                                                                                                                                    |
| Accurate mass tolerance (MS <sup>2</sup> ) for peak identification | 0.25                                                                                                                                                                                                                                     |
| Identification score cut off                                       | 80%                                                                                                                                                                                                                                      |
| Exclusion mass list (tolerance: 0.005 Da)                          | 59.061, 77.0379, 100.0731, 118.0863,<br>122.0966, 124.0398, 124.0874,<br>140.999, 141.9576, 158.0261,<br>159.0302, 160.0226, 213.4248,<br>213.4351, 214.089, 214.105,<br>215.0933, 216.086, 216.1044,<br>279.0919, 354.286, and 371.3115 |

---



**(b) SWATH/DDA positive ion mode in the lipid analysis**

---

|                                                                    |                                                                                                                                     |
|--------------------------------------------------------------------|-------------------------------------------------------------------------------------------------------------------------------------|
| Retention time begin                                               | 0.5 min                                                                                                                             |
| Retention time end                                                 | 11.5 min                                                                                                                            |
| Mass range begin                                                   | 100 Da                                                                                                                              |
| Mass range end                                                     | 1250 Da                                                                                                                             |
| MS <sup>1</sup> tolerance for centroid                             | 0.01 Da                                                                                                                             |
| MS <sup>2</sup> tolerance for centroid                             | 0.1 Da                                                                                                                              |
| Peak detection-based                                               | Unchecked                                                                                                                           |
| Smoothing method                                                   | Linear weighted moving average                                                                                                      |
| Smoothing level                                                    | 2 scan                                                                                                                              |
| Minimum peak width                                                 | 5 scan                                                                                                                              |
| Minimum peak height                                                | 2000 amplitude                                                                                                                      |
| Mass slice width                                                   | 0.1 Da                                                                                                                              |
| Band width                                                         | 5 scan                                                                                                                              |
| Segment number                                                     | 1                                                                                                                                   |
| Peak consideration                                                 | Both                                                                                                                                |
| Sigma window value                                                 | 0.001 min                                                                                                                           |
| Exclude after precursor                                            | Checked                                                                                                                             |
| Retention time tolerance for peak identification                   | 0.5 min                                                                                                                             |
| Accurate mass tolerance (MS <sup>1</sup> ) for peak identification | 0.025                                                                                                                               |
| Accurate mass tolerance (MS <sup>2</sup> ) for peak identification | 0.25                                                                                                                                |
| Identification score cut off                                       | 70%                                                                                                                                 |
| Retention time tolerance for peak alignment                        | 0.1 min                                                                                                                             |
| MS <sup>1</sup> tolerance for peak alignment                       | 0.025 Da                                                                                                                            |
| Retention time factor                                              | 0.5                                                                                                                                 |
| MS <sup>1</sup> factor                                             | 0.5                                                                                                                                 |
| Peak count filter                                                  | 0%                                                                                                                                  |
| QC at least filter                                                 | Checked                                                                                                                             |
| Gap filling option                                                 | Checked                                                                                                                             |
| Exclusion mass list (tolerance: 0.005 Da)                          | 100.9993, 101.1073, 102.0901,<br>118.0854, 140.9984, 158.0264,<br>184.1788, 186.0576, 214.0881,<br>215.0947, 216.0849, and 279.0926 |

---

### (c) SWATH/DDA negative ion mode in the lipid analysis

---

|                                                                    |                                                                                                                                                                                                                    |
|--------------------------------------------------------------------|--------------------------------------------------------------------------------------------------------------------------------------------------------------------------------------------------------------------|
| Retention time begin                                               | 0.5 min                                                                                                                                                                                                            |
| Retention time end                                                 | 10 min                                                                                                                                                                                                             |
| Mass range begin                                                   | 100 Da                                                                                                                                                                                                             |
| Mass range end                                                     | 1250 Da                                                                                                                                                                                                            |
| MS <sup>1</sup> tolerance for centroid                             | 0.01 Da                                                                                                                                                                                                            |
| MS <sup>2</sup> tolerance for centroid                             | 0.1 Da                                                                                                                                                                                                             |
| Peak detection-based                                               | Unchecked                                                                                                                                                                                                          |
| Smoothing method                                                   | Linear weighted moving average                                                                                                                                                                                     |
| Smoothing level                                                    | 2 scan                                                                                                                                                                                                             |
| Minimum peak width                                                 | 4 scan                                                                                                                                                                                                             |
| Minimum peak height                                                | 500 amplitude                                                                                                                                                                                                      |
| Mass slice width                                                   | 0.1 Da                                                                                                                                                                                                             |
| Band width                                                         | 5 scan                                                                                                                                                                                                             |
| Segment number                                                     | 1                                                                                                                                                                                                                  |
| Peak consideration                                                 | Both                                                                                                                                                                                                               |
| Sigma window value                                                 | 0.001 min                                                                                                                                                                                                          |
| Exclude after precursor                                            | Checked                                                                                                                                                                                                            |
| Retention time tolerance for peak identification                   | 0.5 min                                                                                                                                                                                                            |
| Accurate mass tolerance (MS <sup>1</sup> ) for peak identification | 0.025                                                                                                                                                                                                              |
| Accurate mass tolerance (MS <sup>2</sup> ) for peak identification | 0.25                                                                                                                                                                                                               |
| Identification score cut off                                       | 70%                                                                                                                                                                                                                |
| Retention time tolerance for peak alignment                        | 0.1 min                                                                                                                                                                                                            |
| MS <sup>1</sup> tolerance for peak alignment                       | 0.025 Da                                                                                                                                                                                                           |
| Retention time factor                                              | 0.5                                                                                                                                                                                                                |
| MS <sup>1</sup> factor                                             | 0.5                                                                                                                                                                                                                |
| Peak count filter                                                  | 0%                                                                                                                                                                                                                 |
| QC at least filter                                                 | Checked                                                                                                                                                                                                            |
| Gap filling option                                                 | Checked                                                                                                                                                                                                            |
| Exclusion mass list (tolerance: 0.005 Da)                          | 100.9342, 112.9862, 115.9207,<br>130.9668, 132.9243, 139.0088,<br>158.9769, 182.9895, 186.9327,<br>212.0751, 213.0784, 248.9672,<br>316.9489, 384.9353, 452.9176,<br>520.9081, 588.8986, 656.8814,<br>and 724.8645 |

---

**Supplementary Note:** This not describes the mathematical equations implemented in the MS-DIAL program, cited in the **Online Methods**.

**Equation 1** is the function of linearly weighted smoothing average.

$$\text{Equation 1: } f(x)_{\text{new}} = \frac{\sum_{i=-n}^n (n - i + 1) \times f(x + i)}{n^2}$$

$n$  is the number of data points integrated by the smoother.

**Equation 2** and **Equation 3** are the mathematical functions to calculate first derivative and second derivative values, respectively.

$$\text{Equation 2: First derivative: } f'(x) = \frac{-2x_{-2} - x_{-1} + x_{+1} + 2x_{+2}}{10}$$

$$\text{Equation 3: Second derivative: } f''(x) = \frac{2x_{-2} - x_{-1} - 2x_0 - x_{+1} + 2x_{+2}}{7}$$

$x_0$  is the focused data point to calculate its derivatives that are calculated by five-point approximations.

**Equation 4** is the function of spectral centroiding.

$$\text{Equation 4: Centroid} = \frac{\sum_n \text{ion counts}(n) \times m/z(n)}{\sum_n \text{ion counts}(n)} \quad (n \in \text{centroid tolerance})$$

$n$  is the spans the user-defined region between the peak's left and right edges for each detected peak in the mass chromatogram.

**Equation 5, 6, and 7** are the functions to calculate the ideal slope value of detected peaks.

$$\text{Equation 5: } \text{ideal slope}_{\text{left}} = \sum_{k=\text{left edge}}^{\text{peak top}} f'(k) \quad \text{with } f'(k) \geq 0$$

$$\text{Equation 6: } ideal\ slope_{right} = \sum_{k=right\ edge}^{peak\ top} |f'(k)| \text{ with } f'(k) \leq 0$$

$$\text{Equation 7: } ideal\ slope = \frac{ideal\ slope_{left} + ideal\ slope_{right}}{\sum_{k=left\ edge}^{right\ edge} |f'(k)|}$$

$f'(k)$  is calculated by **Equation 2 (Online Methods)** and the value evaluates the smoothness, i.e., whether the peak contains any spike noise within its left- and right edges.

**Equation 8, 9, and 10** are the functions to calculate the sharpness value of detected peaks.

$$\text{Equation 8: } sharpness_{left} = \max_n \frac{A_{max} - A(n)}{n\sqrt{A_{max}}}$$

$$\text{Equation 9: } sharpness_{right} = \max_n \frac{A_{max} - A(n)}{n\sqrt{A_{max}}}$$

$$\text{Equation 10: } sharpness = \frac{sharpness_{left} + sharpness_{right}}{2}$$

Here,  $A_{max}$  and  $A(n)$  denote the height of the peak top, and the height of data point  $n$ -step away from the peak top, respectively. The sharpness value evaluates peak symmetry in combination with the absolute intensity.

**Equation 11** is the second Gaussian derivative filter fitted to the array of sharpness values (default delta = 0.001 min).

$$\text{Equation 11: Matched filter: } \left\{1 - \left(\frac{x}{\delta}\right)^2\right\} \times \exp\left\{-\frac{1}{2}\left(\frac{x}{\delta}\right)^2\right\} \text{ (eq. 11)}$$

**Equation 12** is the function of reverse dot product (also see **Equation 6 of Online Methods**).

$$\text{Equation 12: } dot\ product_{reverse} = \frac{(\sum wA_{act}.wA_{lib.})^2}{\sum wA_{act.}^2 \sum wA_{lib.}^2} \text{ (against spectrum included in library)}$$

**Equation 13, 14, and 15** are the functions to calculate total scores. If retention time information is not available for compound identification, the total score is calculated as **Equation 13**. If the formula information is not available, the total score is calculated as **Equation 14**. If both retention time and formula information are not available, the total score is calculated as **Equation 15**.

$$\text{Equation 13: Total score} = \frac{\text{MS/MS similarity} + \text{MS1 similarity} + 0.5 \times \text{isotope ratio similarity}}{2.5} \times 100$$

$$\text{Equation 14: Total score} = \frac{\text{MS/MS similarity} + \text{MS1 similarity} + \text{RT similarity}}{3} \times 100$$

$$\text{Equation 15: Total score} = \frac{\text{MS/MS similarity} + \text{MS1 similarity}}{2} \times 100$$
